# Supplementary material for: Epigenetics and chromatin structure regulate var2csa expression and the placental binding phenotype in Plasmodium falciparum
Source: bioRxiv preprint, doi:10.1101/2023.11.14.567110, version 2 (2026-01-14)
Supplement: Supplemental Table 1 [file 567110_file07.xlsx]

## Sheet: read_counts
gene	name	description	NF54CSAh_rep1	NF54CSAh_rep2	NF54CSAh_rep3	NF54_rep1	NF54_rep2	NF54_rep3
PF3D7_0100100	VAR	erythrocyte membrane protein 1, PfEMP1	32	4	7	727	263	315
PF3D7_0100200	RIF	rifin	1	1	0	3	28	2
PF3D7_0100300	VAR	erythrocyte membrane protein 1, PfEMP1	3	0	0	28	13	18
PF3D7_0100400	RIF	rifin	0	0	0	2	11	0
PF3D7_0100600	RIF	rifin	0	0	0	0	0	0
PF3D7_0100700		Plasmodium exported protein, unknown function, fragment	0	0	0	0	0	0
PF3D7_0100800	RIF	rifin	0	0	0	0	0	0
PF3D7_0100900	RIF	rifin	2	0	0	0	2	0
PF3D7_0101000	RIF	rifin	1	0	0	0	0	0
PF3D7_0101100	EPF4	exported protein family 4	1	1	0	0	0	0
PF3D7_0101200	EPF3	exported protein family 3	0	0	0	0	0	0
PF3D7_0101300	MC-2TM	Pfmc-2TM Maurer's cleft two transmembrane protein	0	0	0	0	0	0
PF3D7_0101600	RIF	rifin	1	0	1	0	0	0
PF3D7_0101800		stevor	0	0	0	0	0	0
PF3D7_0101900	RIF	rifin	2	0	0	1	0	0
PF3D7_0102200	RESA	ring-infected erythrocyte surface antigen	2709	306	647	4112	581	1679
PF3D7_0102300		Plasmodium exported protein, unknown function	0	0	0	0	0	0
PF3D7_0102500	EBA181	erythrocyte binding antigen-181	25	8	9	14	14	3
PF3D7_0102600	FIKK1	serine/threonine protein kinase, FIKK family	174	152	38	81	321	177
PF3D7_0102700	MaTrA	merozoite-associated tryptophan-rich antigen	13	11	10	3	3	15
PF3D7_0102800		seipin domain-containing protein, putative	0	0	2	0	0	2
PF3D7_0102900		aspartate--tRNA ligase	416	124	55	256	184	176
PF3D7_0103000		vacuolar protein sorting-associated protein VTA1, putative	0	0	1	1	0	0
PF3D7_0103100	VPS51	vacuolar protein sorting-associated protein 51, putative	14	2	1	2	1	3
PF3D7_0103200	NT4	nucleoside transporter 4	57	41	21	42	41	70
PF3D7_0103300		conserved protein, unknown function	204	31	7	171	54	82
PF3D7_0103400		zinc-carboxypeptidase, putative	16	12	1	16	13	17
PF3D7_0103500		conserved Plasmodium protein, unknown function	1	0	0	0	1	0
PF3D7_0103600	PSH1	ATP-dependent DNA/RNA helicase PSH1	11	1	1	8	2	2
PF3D7_0103700	PSTK	L-seryl-tRNA(Sec) kinase, putative	3	0	1	5	0	3
PF3D7_0103800	ARP1	actin-related protein ARP1, putative	1	1	0	0	1	1
PF3D7_0103900	PIESP15	parasite-infected erythrocyte surface protein	7	1	1	3	3	3
PF3D7_0104000	TRSP	thrombospondin-related sporozoite protein	0	0	0	0	0	0
PF3D7_0104100		protein E140, putative	0	0	0	0	1	0
PF3D7_0104200		StAR-related lipid transfer protein	67	72	21	17	49	29
PF3D7_0104300	UBP1	ubiquitin carboxyl-terminal hydrolase 1, putative	901	67	52	659	151	177
PF3D7_0104400	LytB	4-hydroxy-3-methylbut-2-enyl diphosphate reductase	15	9	0	5	5	8
PF3D7_0104500		conserved protein, unknown function	30	16	8	17	17	49
PF3D7_0104600		conserved Plasmodium protein, unknown function	4	0	0	3	1	1
PF3D7_0104700	MFR2	major facilitator superfamily-related transporter, putative	0	0	0	0	0	0
PF3D7_0104800	NPT1	novel putative transporter 1, putative	0	1	0	0	1	0
PF3D7_0105100		conserved Apicomplexan protein, unknown function	0	0	0	0	0	0
PF3D7_0105200		heptatricopeptide repeat and RAP domain-containing protein, putative	7	4	0	2	5	4
PF3D7_0105300	CAP	cyclase-associated protein	0	1	0	0	0	0
PF3D7_0105400		conserved Plasmodium protein, unknown function	0	0	0	0	0	0
PF3D7_0105500		conserved protein, unknown function	0	1	0	0	1	0
PF3D7_0105600		FtsJ-like methyltransferase, putative	177	26	19	125	63	76
PF3D7_0105700		asparagine-rich antigen Pfa35-2	3	3	0	4	0	2
PF3D7_0105800		cyclin-dependent kinases regulatory subunit, putative	0	1	0	1	0	1
PF3D7_0105900		3'-5' exonuclease, putative	0	0	0	0	0	0
PF3D7_0106000		conserved protein, unknown function	2	0	0	0	1	0
PF3D7_0106100		V-type proton ATPase subunit C, putative	49	13	3	22	19	16
PF3D7_0106200		EF hand domain-containing protein, putative	2	0	2	1	0	0
PF3D7_0106300	ATP6	calcium-transporting ATPase	1085	341	248	693	321	586
PF3D7_0106400		pre-rRNA-processing protein TSR2, putative	46	6	10	32	14	24
PF3D7_0106500		conserved Plasmodium protein, unknown function	3	0	0	0	0	0
PF3D7_0106600		conserved Plasmodium protein, unknown function	0	0	0	1	0	0
PF3D7_0106700	AARP2	small ribosomal subunit assembling AARP2 protein	781	59	29	534	118	200
PF3D7_0106800	RAB5c	ras-related protein Rab-5C	10	28	1	3	6	3
PF3D7_0106900	IspD	2-C-methyl-D-erythritol 4-phosphate cytidylyltransferase, putative	0	0	0	0	0	0
PF3D7_0107000	CEN1	centrin-1	2	5	0	3	1	5
PF3D7_0107100		conserved protein, unknown function	1	0	0	0	2	1
PF3D7_0107200	CCR4-3	CCR4 domain-containing protein 3, putative	0	1	0	1	0	0
PF3D7_0107300		conserved Plasmodium protein, unknown function	0	0	0	0	0	0
PF3D7_0107400	ATPk	ATP synthase-associated protein, putative	0	0	0	0	0	0
PF3D7_0107500	NCR1	Niemann-Pick type C1-related protein	1847	453	207	1188	332	984
PF3D7_0107600	eIK2	eukaryotic translation initiation factor 2-alpha kinase 2, putative	1	0	0	0	0	0
PF3D7_0107700		dolichyl-diphosphooligosaccharide--protein glycosyltransferase subunit OST3/OST6, putative	0	0	0	0	0	0
PF3D7_0107800	MRE11	double-strand break repair protein MRE11	3	1	0	3	0	1
PF3D7_0107900		conserved Plasmodium protein, unknown function	8	6	3	3	4	2
PF3D7_0108000		proteasome subunit beta type-3, putative	174	124	64	146	83	149
PF3D7_0108100		conserved protein, unknown function	1	1	0	1	0	0
PF3D7_0108300	ARP	conserved Plasmodium protein, unknown function	2381	118	46	1983	205	394
PF3D7_0108400		mitochondrial carrier protein, putative	21	8	7	8	3	9
PF3D7_0108500		ELM2 domain-containing protein, putative	3310	280	686	2366	1088	1049
PF3D7_0108600		DnaJ domain-containing protein, putative	224	13	59	137	78	63
PF3D7_0108700	PSOP24	secreted ookinete protein, putative	442	54	18	281	67	135
PF3D7_0108800		mitochondrial carrier protein, putative	13	4	1	8	8	14
PF3D7_0109000	PHIL1	photosensitized INA-labeled protein PHIL1	1	7	7	5	0	1
PF3D7_0109100	CCp5	LCCL domain-containing protein	0	0	0	1	0	0
PF3D7_0109200	CFIM25	cleavage and polyadenylation specificity factor subunit 5, putative	16	12	4	7	7	10
PF3D7_0109300		elongation of fatty acids protein, putative	0	0	0	0	0	0
PF3D7_0109400		tubulin-specific chaperone a, putative	17	20	1	6	15	3
PF3D7_0109500		N-acetyltransferase, GNAT family, putative	401	133	141	237	256	131
PF3D7_0109600	CoSP	cold-shock protein, putative	4	0	1	4	0	2
PF3D7_0109700	RRP36	rRNA biogenesis protein RRP36, putative	43	0	1	15	9	16
PF3D7_0109800	cPheRS	phenylalanine--tRNA ligase alpha subunit	426	110	106	277	199	175
PF3D7_0109850		phosphatidate cytidylyltransferase, putative	0	0	0	0	0	0
PF3D7_0109950	C2AP3	respiratory chain complex 2 associated protein 3	1	1	1	2	4	5
PF3D7_0110000		conserved Plasmodium protein, unknown function	17	12	4	7	15	12
PF3D7_0110100	SELB	selenocysteine-specific elongation factor, putative	36	12	6	20	16	33
PF3D7_0110200	ERV1	FAD-linked sulfhydryl oxidase ERV1, putative	19	3	3	10	8	15
PF3D7_0110400	RPB9	DNA-directed RNA polymerase II subunit RPB9, putative	432	138	110	200	183	262
PF3D7_0110500	BDP3	bromodomain protein 3, putative	163	22	6	91	32	38
PF3D7_0110600	PIP5K	phosphatidylinositol-4-phosphate 5-kinase	862	134	77	615	224	388
PF3D7_0110700	CAF1C	chromatin assembly factor 1 subunit C, putative	12	5	0	11	3	8
PF3D7_0110800		transcription initiation factor TFIIB, putative	189	81	33	110	95	106
PF3D7_0110900	AKLP1	adenylate kinase-like protein 1	8	2	2	3	3	1
PF3D7_0111000		kinesin-8B, putative	2	0	1	1	0	0
PF3D7_0111200		conserved protein, unknown function	0	0	0	0	0	0
PF3D7_0111300		P-loop containing nucleoside triphosphate hydrolase, putative	5	0	0	0	0	0
PF3D7_0111400	GEXP19	conserved Plasmodium protein, unknown function	0	0	0	0	0	1
PF3D7_0111500		UMP-CMP kinase, putative	11	14	3	5	12	1
PF3D7_0111600		conserved Plasmodium protein, unknown function	18	0	3	7	7	2
PF3D7_0111700		conserved protein, unknown function	2	0	0	0	1	0
PF3D7_0111800		eukaryotic translation initiation factor 4E, putative	26	4	1	7	5	10
PF3D7_0111900		mitochondrial distribution and morphology protein, putative	8	7	1	3	4	9
PF3D7_0112000	TatD	TatD-like deoxyribonuclease	20	8	5	19	13	12
PF3D7_0112100	PIMMS1	PIMMS1 protein	0	1	0	0	0	0
PF3D7_0112200	MRP1	multidrug resistance-associated protein 1	13	9	0	3	7	13
PF3D7_0112800		Plasmodium exported protein (hyp11), unknown function	2	0	0	3	0	2
PF3D7_0112900		Plasmodium exported protein, unknown function	0	0	0	1	0	0
PF3D7_0113000	GARP	glutamic acid-rich protein GARP	1484	50	34	4226	1237	887
PF3D7_0113100	SURF1.1	surface-associated interspersed protein 1.1 (SURFIN 1.1)	0	0	0	0	0	0
PF3D7_0113200		Plasmodium exported protein, unknown function	19	23	1	14	18	21
PF3D7_0113300		Plasmodium exported protein (hyp1), unknown function	378	32	31	232	84	107
PF3D7_0113400		Plasmodium exported protein, unknown function	5	0	0	1	0	3
PF3D7_0113700	HSP40	heat shock protein 40, type II	432	93	73	434	223	373
PF3D7_0113800		DBL containing protein, unknown function	10	0	0	4	0	0
PF3D7_0113900	CBP1	CX3CL1-binding protein 1	237	52	111	203	105	349
PF3D7_0114000	EPF1	exported protein family 1	119	1	1	19	2	2
PF3D7_0114100	MC-2TM	Pfmc-2TM Maurer's cleft two transmembrane protein	0	0	0	0	0	0
PF3D7_0114200	EPF3	exported protein family 3	0	0	0	0	0	0
PF3D7_0114500		Plasmodium exported protein (hyp10), unknown function	0	3	0	0	2	6
PF3D7_0114700	RIF	rifin	0	0	0	0	0	0
PF3D7_0114750		Plasmodium exported protein, unknown function, fragment	0	0	0	0	0	0
PF3D7_0114800		Plasmodium exported protein (hyp7), unknown function	0	0	0	0	0	0
PF3D7_0115000	SURF1.3	surface-associated interspersed protein 1.3 (SURFIN 1.3)	0	0	0	0	0	0
PF3D7_0115100		Plasmodium exported protein (PHISTa), unknown function	0	0	0	0	0	0
PF3D7_0115200	RIF	rifin	0	0	0	0	0	0
PF3D7_0115300	RIF	rifin	0	0	0	0	0	0
PF3D7_0115400		stevor	0	0	0	0	2	0
PF3D7_0115600	RIF	rifin	0	0	0	2	20	1
PF3D7_0115700	VAR	erythrocyte membrane protein 1, PfEMP1	2	0	2	188	66	85
PF3D7_0200100	VAR	erythrocyte membrane protein 1, PfEMP1	9	4	0	629	228	369
PF3D7_0200200	RIF	rifin	0	0	0	0	1	0
PF3D7_0200300		erythrocyte membrane protein 1 (PfEMP1), exon 2	0	2	0	0	0	0
PF3D7_0200400		stevor	0	0	0	0	0	0
PF3D7_0200500	RIF	rifin	1	0	0	0	0	0
PF3D7_0200600	RIF	rifin	1	0	0	0	0	0
PF3D7_0200700	RIF	rifin	0	0	0	0	0	0
PF3D7_0201000	RIF	rifin	0	0	0	0	0	0
PF3D7_0201100		Plasmodium exported protein, unknown function, fragment	0	0	0	0	0	0
PF3D7_0201200	RIF	rifin	0	0	0	0	1	0
PF3D7_0201300		stevor	0	0	0	0	0	0
PF3D7_0201400		Plasmodium exported protein (hyp10), unknown function	0	0	0	0	0	0
PF3D7_0201500		Plasmodium exported protein (hyp9), unknown function	89	48	4	17	66	40
PF3D7_0201600	RLP1	PHISTb domain-containing RESA-like protein 1	373	145	23	294	214	362
PF3D7_0201700		DnaJ protein, putative	490	48	54	540	118	627
PF3D7_0201800	KAHsp40	knob associated heat shock protein 40	1001	503	254	866	542	1299
PF3D7_0201900	EMP3	erythrocyte membrane protein 3	5073	409	76	2569	358	664
PF3D7_0202000	KAHRP	knob-associated histidine-rich protein	180242	33034	40476	141836	104947	82447
PF3D7_0202100	LSAP2	liver stage associated protein 2	78	14	38	57	17	87
PF3D7_0202200	PTP1	EMP1-trafficking protein	317	42	73	356	110	299
PF3D7_0202300		Plasmodium exported protein (hyp11), unknown function	1	7	0	1	0	2
PF3D7_0202400	PTEF	translation-enhancing factor	4072	519	57	912	263	330
PF3D7_0202500	ETRAMP2	early transcribed membrane protein 2	14714	3740	4493	14135	7996	9732
PF3D7_0202600		nucleic acid-binding protein, putative	27	6	1	20	4	22
PF3D7_0202700	OPP	octaprenyl pyrophosphate synthase	0	0	0	0	0	0
PF3D7_0202800		conserved Plasmodium protein, unknown function	0	0	0	0	0	0
PF3D7_0202900	DHHC12	palmitoyltransferase DHHC12, putative	0	0	0	0	0	0
PF3D7_0203000	ROPE	repetitive organellar protein, putative	2	0	0	2	0	0
PF3D7_0203100		protein kinase, putative	10	0	0	7	0	2
PF3D7_0203200		conserved Plasmodium protein, unknown function	8	0	0	2	0	1
PF3D7_0203300	ERCC1	ERCC1 nucleotide excision repair protein, putative	0	0	1	0	2	4
PF3D7_0203400		conserved protein, unknown function	0	5	1	0	0	2
PF3D7_0203600		conserved Plasmodium protein, unknown function	0	0	0	0	0	0
PF3D7_0203700	MAK16	protein MAK16, putative	414	75	35	338	102	176
PF3D7_0203800		conserved Plasmodium protein, unknown function	0	1	0	0	0	1
PF3D7_0203900		5'-3' exonuclease, putative	2	2	1	0	2	2
PF3D7_0204000	CAPH2	condensin-2 complex subunit H2, putative	1	2	0	1	1	0
PF3D7_0204100		Sel1 repeat-containing protein, putative	19	5	1	10	0	3
PF3D7_0204200	SEC66	translocation protein SEC66, putative	246	183	69	191	100	260
PF3D7_0204300		conserved Plasmodium protein, unknown function	54	1	1	36	18	18
PF3D7_0204400		dynein light chain, putative	2	1	0	0	0	3
PF3D7_0204500	AspAT	aspartate transaminase	47	8	1	28	5	34
PF3D7_0204600		5'-3' exonuclease, putative	14	3	0	7	3	6
PF3D7_0204700	HT1	hexose transporter	1511	585	445	670	586	614
PF3D7_0204800		3'-5' exonuclease, putative	0	0	0	0	0	0
PF3D7_0204900	COQ5	2-methoxy-6-polyprenyl-1,4-benzoquinol methylase, mitochondrial, putative	1	1	0	0	0	1
PF3D7_0205000		conserved Plasmodium protein, unknown function	0	0	0	0	0	0
PF3D7_0205100		conserved Plasmodium protein, unknown function	0	0	0	0	0	0
PF3D7_0205200		MORN repeat protein, putative	0	0	0	0	0	0
PF3D7_0205300		conserved Plasmodium protein, unknown function	0	0	0	0	0	0
PF3D7_0205400		PCI domain-containing protein, putative	112	13	14	48	30	28
PF3D7_0205500		DNA-directed RNA polymerase II 16 kDa subunit, putative	48	36	15	28	17	78
PF3D7_0205600		conserved Plasmodium protein, unknown function	41	8	1	16	10	3
PF3D7_0205700		RNA-binding protein, putative	37	18	2	27	11	40
PF3D7_0205800	PH1	PH domain-containing protein, putative	0	0	0	1	1	1
PF3D7_0205900	RPN1	26S proteasome regulatory subunit RPN1, putative	287	73	35	189	126	150
PF3D7_0206000	RAD2	DNA repair protein RAD2, putative	104	13	0	67	20	30
PF3D7_0206100	SufE	cysteine desulfuration protein SufE	51	19	8	28	16	65
PF3D7_0206200	PAT	pantothenate transporter	7	10	4	8	0	4
PF3D7_0206500		conserved Plasmodium protein, unknown function	201	31	11	141	35	74
PF3D7_0206600		DNA-directed RNA polymerase III subunit RPC10, putative	3	0	0	0	1	1
PF3D7_0206700	ADSL	adenylosuccinate lyase	229	75	51	140	78	129
PF3D7_0206800	MSP2	merozoite surface protein 2	23	14	33	21	18	14
PF3D7_0206900	MSP5	merozoite surface protein 5	4	5	1	2	1	0
PF3D7_0207000	MSP4	merozoite surface protein 4	5	10	12	1	6	4
PF3D7_0207100		conserved Plasmodium protein, unknown function	5	7	1	0	0	1
PF3D7_0207200	ISCA1	iron-sulfur assembly protein, putative	0	0	0	0	0	0
PF3D7_0207300	SERA8	serine repeat antigen 8	0	0	0	0	0	0
PF3D7_0207400	SERA7	serine repeat antigen 7	0	1	0	2	1	0
PF3D7_0207500	SERA6	serine repeat antigen 6	4	2	1	2	4	1
PF3D7_0207600	SERA5	serine repeat antigen 5	37	32	12	13	24	26
PF3D7_0207700	SERA4	serine repeat antigen 4	5	3	2	7	6	5
PF3D7_0207800	SERA3	serine repeat antigen 3	7	1	2	10	0	6
PF3D7_0207900	SERA2	serine repeat antigen 2	0	0	0	0	0	0
PF3D7_0208000	SERA1	serine repeat antigen 1	0	0	0	0	0	0
PF3D7_0208100		conserved Plasmodium protein, unknown function	0	2	0	3	5	2
PF3D7_0208200	KRR1	KRR1 small subunit processome component, putative	121	35	17	86	44	64
PF3D7_0208300		conserved Plasmodium protein, unknown function	61	8	4	48	18	15
PF3D7_0208400		conserved Plasmodium protein, unknown function	88	8	0	60	11	17
PF3D7_0208500	ACP	acyl carrier protein	0	0	0	0	0	0
PF3D7_0208600	RRF1	ribosome-recycling factor	2	5	0	3	3	1
PF3D7_0208700		SHS2 domain-containing protein, putative	10	5	2	4	5	20
PF3D7_0208800		protein P22, putative	21	5	5	13	10	5
PF3D7_0208900	P230p	6-cysteine protein P230p	15	0	5	3	0	0
PF3D7_0209000	P230	6-cysteine protein P230	4	0	0	1	1	2
PF3D7_0209100	PATPL1	patatin-like phospholipase 1	151	30	34	118	49	110
PF3D7_0209200	MTR3	exosome complex component MTR3, putative	48	22	8	24	13	56
PF3D7_0209300	IspF	2C-methyl-D-erythritol 2,4-cyclodiphosphate synthase	2	0	1	1	2	3
PF3D7_0209400		ARMT1-like domain-containing protein, putative	21	11	8	19	13	39
PF3D7_0209500		conserved Plasmodium protein, unknown function	0	0	0	0	0	0
PF3D7_0209600		transporter, putative	5	0	0	3	1	4
PF3D7_0209700		RING zinc finger protein, putative	368	69	65	243	87	191
PF3D7_0209800	UAP56	ATP-dependent RNA helicase UAP56	2011	639	400	1293	811	972
PF3D7_0210000	Sec61-gamma	secretory complex protein 61 gamma subunit	149	30	28	77	59	120
PF3D7_0210100	RPL37A	60S ribosomal protein L37ae, putative	2248	601	474	1463	1127	1286
PF3D7_0210200		conserved Plasmodium protein, unknown function	3	2	0	3	2	2
PF3D7_0210300		monocarboxylate transporter, putative	1	2	0	0	2	2
PF3D7_0210400		50S ribosomal protein L33, putative	0	4	1	0	0	2
PF3D7_0210500		conserved Plasmodium protein, unknown function	3	0	0	0	1	0
PF3D7_0210600	CERLI1	protein CERLI1	2	1	1	1	3	1
PF3D7_0210700	SYN17	syntaxin, Qa-SNARE family	0	0	0	0	0	0
PF3D7_0210800		conserved Plasmodium protein, unknown function	16	1	2	11	3	3
PF3D7_0210900		conserved Plasmodium protein, unknown function	119	19	18	98	54	164
PF3D7_0211100		conserved Plasmodium protein, unknown function	0	0	0	0	2	0
PF3D7_0211200	RAB5a	ras-related protein Rab-5A	3	4	1	1	4	1
PF3D7_0211300		ubiquinol-cytochrome-c reductase complex assembly factor 1, putative	0	0	0	0	0	0
PF3D7_0211400	KASIII	beta-ketoacyl-ACP synthase III	0	0	0	0	0	0
PF3D7_0211500		GAF domain-related protein, putative	0	0	0	0	0	0
PF3D7_0211600	ALG14	UDP-N-acetylglucosamine transferase subunit ALG14, putative	0	0	0	0	0	0
PF3D7_0211700	TKL1	tyrosine kinase-like protein, putative	1	1	0	0	4	1
PF3D7_0211800	AsnRS	asparagine--tRNA ligase	703	272	146	536	326	565
PF3D7_0211900		pseudouridine synthase, putative	1	0	0	0	0	0
PF3D7_0212000		GDP-fructose:GMP antiporter, putative	0	1	0	0	0	0
PF3D7_0212100		conserved Plasmodium protein, unknown function	496	38	24	362	73	209
PF3D7_0212200		ribosomal protein L12, mitochondrial, putative	23	4	2	16	7	9
PF3D7_0212300	ERF1	eukaryotic peptide chain release factor subunit 1, putative	1233	398	208	777	432	610
PF3D7_0212400		conserved Plasmodium membrane protein, unknown function	222	32	8	163	35	92
PF3D7_0212500		conserved Plasmodium protein, unknown function	824	67	21	580	95	208
PF3D7_0212600	SPATR	secreted protein with altered thrombospondin repeat domain	2	0	5	3	1	0
PF3D7_0212700		SRR1-like protein	8	11	1	6	5	9
PF3D7_0212800	MATE	multidrug efflux pump, putative	5	4	0	5	4	3
PF3D7_0212900	ATEL1	arginyl-tRNA--protein transferase	1	0	0	0	0	0
PF3D7_0213000		conserved protein, unknown function	0	0	0	0	0	0
PF3D7_0213100	SIS1	protein SIS1	503	418	143	298	261	418
PF3D7_0213200		mitochondrial respiratory chain complex II subunit, putative	0	0	0	1	2	0
PF3D7_0213300	PK7	protein kinase 7	0	2	0	0	0	0
PF3D7_0213400		conserved protein, unknown function	4	3	0	0	2	0
PF3D7_0213500		tetratricopeptide repeat protein, putative	23	7	2	23	6	19
PF3D7_0213600		conserved Plasmodium protein, unknown function	0	0	0	0	0	0
PF3D7_0213700		conserved protein, unknown function	72	79	26	30	28	141
PF3D7_0213800		conserved protein, unknown function	0	0	0	0	1	0
PF3D7_0213900		RTR1 domain-containing protein, putative	177	23	5	143	33	47
PF3D7_0214000	CCT8	T-complex protein 1 subunit theta	365	142	49	159	150	259
PF3D7_0214100	SEC31	protein transport protein SEC31	1454	258	168	885	402	558
PF3D7_0214200	mRPL13	ribosomal protein L13, mitochondrial	6	15	1	1	5	19
PF3D7_0214300		conserved Plasmodium protein, unknown function	6	0	1	1	0	3
PF3D7_0214400		protein LTV1, putative	149	30	15	113	42	113
PF3D7_0214500		conserved Plasmodium protein, unknown function	2	1	0	1	0	0
PF3D7_0214600	STK2	serine/threonine protein kinase STK2, putative	1	1	0	0	0	1
PF3D7_0214700		conserved Plasmodium protein, unknown function	0	0	0	0	0	0
PF3D7_0214800		conserved Plasmodium membrane protein, unknown function	834	115	84	519	191	245
PF3D7_0214900	RON6	rhoptry neck protein 6	1	1	0	0	1	0
PF3D7_0215000	ACS9	acyl-CoA synthetase	7	0	0	4	1	3
PF3D7_0215100		RING zinc finger protein, putative	33	35	16	36	32	43
PF3D7_0215200		conserved Plasmodium protein, unknown function	0	0	0	3	1	1
PF3D7_0215300	ACS8	acyl-CoA synthetase	111	23	13	72	37	99
PF3D7_0215400		conserved Plasmodium protein, unknown function	170	28	11	90	37	108
PF3D7_0215500		conserved Plasmodium protein, unknown function	43	3	2	29	20	7
PF3D7_0215600	GET2	Golgi to ER traffic protein 2	54	7	3	29	12	53
PF3D7_0215700	RPB2	DNA-directed RNA polymerase II subunit RPB2, putative	1397	506	389	1014	521	825
PF3D7_0215800	ORC5	origin recognition complex subunit 5	1	3	0	0	1	1
PF3D7_0215900	DHHC11	palmitoyltransferase DHHC11, putative	0	0	0	0	0	0
PF3D7_0216000		DEAD/DEAH box helicase, putative	0	0	0	1	0	1
PF3D7_0216100		conserved Plasmodium protein, unknown function	6	0	0	7	0	2
PF3D7_0216200		Alba domain-containing protein, putative	38	11	9	24	10	39
PF3D7_0216300		conserved Plasmodium protein, unknown function	70	9	2	40	29	27
PF3D7_0216400	VPS45	vacuolar protein sorting-associated protein 45	1	0	0	0	0	0
PF3D7_0216500		conserved Plasmodium protein, unknown function	1	0	0	0	0	0
PF3D7_0216600		sugar transporter, putative	432	109	72	373	138	296
PF3D7_0216700	ATG11	autophagy-related protein 11, putative	5	0	0	5	0	1
PF3D7_0216800		TMEM121 domain-containing protein, putative	1	0	0	0	0	0
PF3D7_0216900		conserved Plasmodium protein, unknown function	5	2	1	7	0	5
PF3D7_0217000		conserved Plasmodium membrane protein, unknown function	0	0	0	0	0	0
PF3D7_0217100		ATP synthase subunit alpha, mitochondrial	0	4	1	0	0	1
PF3D7_0217200		conserved Plasmodium protein, unknown function	7	0	0	1	0	1
PF3D7_0217300	AP2S	AP-2 complex subunit sigma, putative	5	0	1	2	2	0
PF3D7_0217400		conserved protein, unknown function	2	0	0	1	0	0
PF3D7_0217500	CDPK1	calcium-dependent protein kinase 1	2	11	11	7	6	2
PF3D7_0217600		conserved Plasmodium protein, unknown function	72	18	9	40	28	51
PF3D7_0217700		E2F-associated phosphoprotein, putative	15	17	0	4	8	16
PF3D7_0217800	RPS26	40S ribosomal protein S26	1921	1197	763	1201	1090	1571
PF3D7_0217900		thioesterase/thiol ester dehydrase-isomerase, putative	0	2	1	0	0	1
PF3D7_0218000	RFC2	replication factor C subunit 2, putative	0	9	1	0	0	1
PF3D7_0218100		conserved protein, unknown function	0	1	0	0	0	0
PF3D7_0218200		SUZ domain-containing protein, putative	14	6	0	9	4	3
PF3D7_0218300		rRNA methyltransferase, putative	1	1	0	3	0	2
PF3D7_0218400	DDX47	ATP-dependent RNA helicase DDX47, putative	232	57	33	140	70	147
PF3D7_0218500	SNRPD2	small nuclear ribonucleoprotein Sm D2, putative	295	177	96	216	139	228
PF3D7_0218600		patatin-like phospholipase, putative	283	18	7	143	58	69
PF3D7_0218700	PRP45	pre-mRNA-processing protein 45, putative	81	5	1	41	17	35
PF3D7_0219100		saccharopine dehydrogenase, putative	18	4	5	7	2	3
PF3D7_0219200	RPS30	40S ribosomal protein S30	1569	880	612	1201	747	1264
PF3D7_0219300		conserved Plasmodium protein, unknown function	7	1	3	3	0	6
PF3D7_0219400		ribosome associated membrane protein RAMP4, putative	314	116	82	178	220	110
PF3D7_0219500		pseudouridine synthase, putative	1	2	0	1	1	0
PF3D7_0219600	RFC1	replication factor C subunit 1	4	1	1	2	3	3
PF3D7_0219700	GEXP20	Plasmodium exported protein (PHISTc), unknown function	58	13	11	30	12	56
PF3D7_0219800		Plasmodium exported protein (PHISTc), unknown function	37	11	4	56	16	45
PF3D7_0219900		Plasmodium exported protein, unknown function	16	0	4	5	7	3
PF3D7_0220000	LSA3	liver stage antigen 3	3567	295	145	3580	420	1301
PF3D7_0220100		DnaJ protein, putative	312	106	48	232	86	285
PF3D7_0220200		Plasmodium exported protein, unknown function	294	214	38	141	173	285
PF3D7_0220300		Plasmodium exported protein, unknown function	29	44	4	6	30	39
PF3D7_0220500		Plasmodium exported protein (hyp2), unknown function	2	2	0	4	4	6
PF3D7_0220600		Plasmodium exported protein (hyp9), unknown function	65	143	20	24	54	74
PF3D7_0220700		Plasmodium exported protein (hyp9), unknown function	117	41	20	48	31	108
PF3D7_0220800	CLAG2	cytoadherence linked asexual protein 2	5	1	0	0	0	1
PF3D7_0221000		Plasmodium exported protein, unknown function	0	0	0	0	0	0
PF3D7_0221200		Plasmodium exported protein (hyp15), unknown function	4	0	2	0	3	2
PF3D7_0221400		stevor	0	0	0	0	0	0
PF3D7_0221700		Plasmodium exported protein, unknown function	23	4	2	25	3	15
PF3D7_0221800		hypothetical protein	5	1	1	1	1	0
PF3D7_0222000	EPF1	exported protein family 1	0	0	0	0	0	0
PF3D7_0222100	MC-2TM	Pfmc-2TM Maurer's cleft two transmembrane protein	0	0	0	0	0	0
PF3D7_0222200	EPF3	exported protein family 3	0	0	0	0	0	0
PF3D7_0222500	RIF	rifin	0	0	0	0	0	0
PF3D7_0222600	RIF	rifin	0	0	0	0	1	0
PF3D7_0222700	RIF	rifin	0	0	0	0	0	0
PF3D7_0222800		stevor	0	0	0	0	0	0
PF3D7_0223100	RIF	rifin	0	0	0	1	12	0
PF3D7_0223200	RIF	rifin	0	0	0	0	0	0
PF3D7_0223300		erythrocyte membrane protein 1 (PfEMP1), exon 2	0	0	0	0	0	0
PF3D7_0223400	RIF	rifin	0	0	2	3	20	1
PF3D7_0223500	VAR	erythrocyte membrane protein 1, PfEMP1	18	0	4	777	268	313
PF3D7_0300100	VAR	erythrocyte membrane protein 1, PfEMP1	42	6	9	568	162	233
PF3D7_0300200	RIF	rifin	0	0	0	0	1	0
PF3D7_0300400		stevor	0	0	0	0	1	0
PF3D7_0300500	RIF	rifin	0	0	0	0	0	0
PF3D7_0300600		Plasmodium exported protein, unknown function, fragment	0	0	0	0	0	0
PF3D7_0300700	RIF	rifin	0	0	0	0	0	0
PF3D7_0300800	RIF	rifin	0	0	0	1	0	0
PF3D7_0300900		stevor	0	0	0	0	1	2
PF3D7_0301000	ACS2	acyl-CoA synthetase	1	0	0	0	0	0
PF3D7_0301100		Plasmodium exported protein (hyp13), unknown function	0	0	0	0	0	0
PF3D7_0301200	FIKK3	serine/threonine protein kinase, FIKK family	29	3	6	30	8	41
PF3D7_0301300	EH1	epoxide hydrolase 1	10	3	2	8	9	15
PF3D7_0301400		Plasmodium exported protein, unknown function	7	3	1	0	9	0
PF3D7_0301500		Plasmodium exported protein, unknown function	7	1	2	7	4	1
PF3D7_0301600	GEXP21	Plasmodium exported protein (hyp1), unknown function	356	131	70	272	136	308
PF3D7_0301700		Plasmodium exported protein, unknown function	528	247	61	96	400	207
PF3D7_0301800		Plasmodium exported protein, unknown function	134	12	39	131	25	63
PF3D7_0301900		conserved protein, unknown function	1	0	0	0	0	0
PF3D7_0302000	PRP46	pre-mRNA-splicing factor PRP46, putative	128	30	25	117	63	103
PF3D7_0302100	SRPK1	serine/threonine protein kinase	469	50	15	303	97	131
PF3D7_0302200	CLAG3.2	cytoadherence linked asexual protein 3.2	2	1	0	0	0	0
PF3D7_0302500	CLAG3.1	cytoadherence linked asexual protein 3.1	13	4	4	11	7	12
PF3D7_0302600	ABCB4	ABC transporter B family member 4, putative	0	0	0	1	0	0
PF3D7_0302700		CDGSH iron-sulfur domain-containing protein, putative	5	4	1	2	2	4
PF3D7_0302800		RNA-binding protein, putative	48	3	4	31	12	15
PF3D7_0302900		exportin-1, putative	227	33	24	201	52	140
PF3D7_0303000	NSF	N-ethylmaleimide-sensitive fusion protein	66	19	13	37	17	47
PF3D7_0303100		CLP1 P-loop domain-containing protein, putative	10	3	1	8	3	2
PF3D7_0303200		lipin, putative	9	4	0	5	2	6
PF3D7_0303300	RPB6	DNA-directed RNA polymerases I, II, and III subunit RPABC2, putative	80	37	22	61	30	94
PF3D7_0303400	DHHC1	palmitoyltransferase DHHC1	1	0	0	2	0	0
PF3D7_0303500		spindle pole body protein, putative	0	0	0	0	0	0
PF3D7_0303600	Plrx	plasmoredoxin	5	4	4	2	8	3
PF3D7_0303700	BCKDH-E2	lipoamide acyltransferase component of branched-chain alpha-keto acid dehydrogenase complex	9	11	1	1	11	3
PF3D7_0303800		IBR domain protein, putative	0	0	0	0	0	0
PF3D7_0303900		phosphatidylethanolamine-binding protein, putative	0	0	0	0	0	1
PF3D7_0304000	IMC1a	inner membrane complex protein 1a, putative	0	2	0	0	0	0
PF3D7_0304100	IMC1e	inner membrane complex protein 1e, putative	0	0	0	0	0	0
PF3D7_0304200	EHD	EH domain-containing protein	391	144	117	258	156	324
PF3D7_0304300		conserved Plasmodium protein, unknown function	0	0	0	0	0	0
PF3D7_0304400	RPL44	60S ribosomal protein L44	759	283	114	510	356	861
PF3D7_0304500	GLP1	1-cys-glutaredoxin-like protein-1	0	3	1	0	4	1
PF3D7_0304600	CSP	circumsporozoite (CS) protein	2	0	0	1	0	0
PF3D7_0304700		conserved Plasmodium protein, unknown function	0	0	0	0	0	0
PF3D7_0304800		conserved Plasmodium membrane protein, unknown function	0	0	0	0	0	0
PF3D7_0304900		conserved protein, unknown function	35	7	2	14	5	17
PF3D7_0305000	EF-Ts	elongation factor Ts	25	11	6	14	11	20
PF3D7_0305100		conserved Plasmodium protein, unknown function	15	3	0	10	2	9
PF3D7_0305200		GRIP domain-containing protein, putative	41	5	0	22	4	4
PF3D7_0305300		transporter, putative	227	55	28	151	52	146
PF3D7_0305400		conserved protein, unknown function	14	5	3	4	3	6
PF3D7_0305500		protein dopey homolog, putative	768	104	23	625	132	298
PF3D7_0305600	APE1	DNA-(apurinic or apyrimidinic site) endonuclease	2	1	0	0	0	3
PF3D7_0305700		ubiquitin-conjugating enzyme MMS2, putative	293	95	50	248	121	213
PF3D7_0305800		P-loop containing nucleoside triphosphate hydrolase, putative	3	0	0	2	0	0
PF3D7_0305900		conserved Plasmodium protein, unknown function	0	0	0	0	0	0
PF3D7_0306000	QCR8	cytochrome b-c1 complex subunit 8, putative	1	1	1	1	2	0
PF3D7_0306100		conserved Plasmodium protein, unknown function	21	0	1	4	9	5
PF3D7_0306200	AHA1	activator of Hsp90 ATPase	17	9	1	5	4	21
PF3D7_0306300	GRX1	glutaredoxin 1	174	223	62	133	85	281
PF3D7_0306400		FAD-dependent glycerol-3-phosphate dehydrogenase, putative	3	2	2	2	3	2
PF3D7_0306500	COX6C	cytochrome c oxidase subunit 6c, putative	0	1	0	0	0	0
PF3D7_0306600	ATPTG17	ATP synthase-associated protein, putative	0	5	0	1	0	1
PF3D7_0306700	EMC5	ER membrane protein complex subunit 5, putative	32	11	14	22	14	59
PF3D7_0306800	CCT2	T-complex protein 1 subunit beta	841	559	192	567	335	700
PF3D7_0306900		40S ribosomal protein S23, putative	7011	2351	2503	3971	3216	2719
PF3D7_0307100	RPS12	40S ribosomal protein S12, putative	359	653	176	264	152	1194
PF3D7_0307200		60S ribosomal protein L7, putative	2908	1667	839	1700	1486	3060
PF3D7_0307300	EB1	microtubule-associated protein RP/EB family, putative	0	0	0	1	0	0
PF3D7_0307400	ClpP	ATP-dependent Clp protease proteolytic subunit	1	0	0	2	0	1
PF3D7_0307500	SKA2	spindle and kinetochore-associated protein 2, putative	1	0	0	1	1	0
PF3D7_0307600		conserved Plasmodium protein, unknown function	3	0	2	0	1	0
PF3D7_0307700		conserved Plasmodium protein, unknown function	23	26	1	10	14	8
PF3D7_0307800		PDZ domain-containing protein, putative	63	20	8	39	27	56
PF3D7_0307900		conserved Plasmodium protein, unknown function	6	0	0	3	1	0
PF3D7_0308000		DNA polymerase delta small subunit, putative	2	0	0	0	1	0
PF3D7_0308100		zinc finger protein, putative	1	0	0	0	0	0
PF3D7_0308200	CCT7	T-complex protein 1 subunit eta	928	484	266	511	363	552
PF3D7_0308300	PIC4	PhIL1-interacting candidate PIC4	0	0	0	0	0	0
PF3D7_0308500		activator of Hsp90 ATPase, putative	78	93	28	36	69	45
PF3D7_0308600	PRPF19	pre-mRNA-processing factor 19, putative	146	55	18	80	35	115
PF3D7_0308700		conserved protein, unknown function	1	1	0	0	0	0
PF3D7_0308800		conserved protein, unknown function	2	0	0	0	0	0
PF3D7_0308900	SF3B1	splicing factor 3B subunit 1, putative	602	113	48	494	156	362
PF3D7_0309000	YVH1	dual specificity protein phosphatase	31	1	1	9	9	11
PF3D7_0309100	OMD	OMD protein, putative	0	0	0	2	0	0
PF3D7_0309200	ARK2	serine/threonine protein kinase ARK2, putative	12	2	0	10	3	7
PF3D7_0309300		N2227-like protein, putative	204	70	76	161	77	232
PF3D7_0309500	AS	asparagine synthetase [glutamine-hydrolyzing], putative	1610	334	385	1066	734	1021
PF3D7_0309600	PfP2	60S acidic ribosomal protein P2	4628	1517	1360	2495	2156	2110
PF3D7_0309700	SBP2	SECIS-binding protein 2, putative	16	1	0	13	3	10
PF3D7_0309800	YTH2	YTH domain-containing protein 2	96	32	29	97	37	59
PF3D7_0309900		conserved Plasmodium protein, unknown function	1	1	0	0	0	0
PF3D7_0310000		50S ribosomal protein L9, apicoplast, putative	0	0	0	0	0	0
PF3D7_0310100	CDPK3	calcium-dependent protein kinase 3	0	0	0	1	0	1
PF3D7_0310200		phd finger protein, putative	997	44	19	767	85	124
PF3D7_0310300		phosphoglycerate mutase, putative	156	9	2	98	29	64
PF3D7_0310400	PIESP1	parasite-infected erythrocyte surface protein	7	0	1	0	1	3
PF3D7_0310500	DHX57	ATP-dependent RNA helicase DHX57, putative	167	30	9	107	46	68
PF3D7_0310600	EIF3K	eukaryotic translation initiation factor 3 subunit K, putative	29	2	2	16	8	15
PF3D7_0310700	TRAPPC4	trafficking protein particle complex subunit 4, putative	9	2	1	6	8	3
PF3D7_0310800		conserved Plasmodium protein, unknown function	31	12	13	17	15	36
PF3D7_0310900		conserved Plasmodium protein, unknown function	3	2	0	1	0	3
PF3D7_0311000		conserved Plasmodium protein, unknown function	0	0	0	0	0	0
PF3D7_0311100		pre-mRNA splicing factor, putative	184	27	11	166	76	80
PF3D7_0311200		valine--tRNA ligase, putative	38	9	1	27	15	13
PF3D7_0311300		phosphatidylinositol 3- and 4-kinase, putative	1	5	0	2	5	3
PF3D7_0311400	PKRP	kinase-related protein PKRP, putative	0	1	0	0	0	0
PF3D7_0311500		conserved protein, unknown function	20	6	18	12	7	13
PF3D7_0311600	OST1	dolichyl-diphosphooligosaccharide--protein glycosyltransferase subunit OST1, putative	13	2	1	1	1	4
PF3D7_0311700	PM6	plasmepsin VI	0	0	0	1	1	0
PF3D7_0311800		ATP synthase F0 subunit d-like protein, putative	1	2	0	0	0	1
PF3D7_0311900		heptatricopeptide repeat-containing protein, putative	0	1	0	0	0	0
PF3D7_0312000		conserved protein, unknown function	0	3	2	0	4	0
PF3D7_0312100		E3 ubiquitin-protein ligase	2	0	0	0	0	0
PF3D7_0312200		tetratricopeptide repeat protein, putative	0	0	0	1	0	2
PF3D7_0312300	RPN12	26S proteasome regulatory subunit RPN12, putative	9	13	3	10	6	36
PF3D7_0312400	GSK3	glycogen synthase kinase 3	12	28	1	7	24	7
PF3D7_0312500	MFR3	multidrug-resistant modulator MFR3	77	44	17	42	39	36
PF3D7_0312800		60S ribosomal protein L26, putative	2288	1297	917	1446	1103	1597
PF3D7_0312900		hypothetical protein	18	4	0	5	1	5
PF3D7_0313000		conserved Plasmodium protein, unknown function	30	2	2	16	12	29
PF3D7_0313100	HRD3	ubiquitin-protein ligase, putative	115	53	15	41	66	77
PF3D7_0313200		conserved protein, unknown function	2	0	0	0	0	1
PF3D7_0313300		YGGT family protein, putative	2	0	0	1	0	0
PF3D7_0313400		conserved Plasmodium protein, unknown function	48	2	2	27	12	12
PF3D7_0313500	PfG	Ras-like G protein	38	2	2	26	5	27
PF3D7_0313600		conserved Plasmodium protein, unknown function	3	4	0	0	1	0
PF3D7_0313700		conserved Plasmodium protein, unknown function	0	1	0	0	0	2
PF3D7_0313800		conserved Plasmodium protein, unknown function	0	0	0	0	0	1
PF3D7_0313900		conserved Plasmodium protein, unknown function	0	0	0	0	0	0
PF3D7_0314000		HSP20-like chaperone, putative	3	17	5	6	3	12
PF3D7_0314100		vesicle transport v-SNARE protein, putative	259	76	96	226	173	189
PF3D7_0314200		conserved Plasmodium protein, unknown function	5	0	0	0	0	0
PF3D7_0314300	DER1-2	DER1-like protein	1	0	0	0	1	0
PF3D7_0314400	PPP6	serine/threonine protein phosphatase 6, putative	332	146	107	213	178	264
PF3D7_0314500		conserved Plasmodium protein, unknown function	45	5	0	20	7	19
PF3D7_0314600		conserved protein, unknown function	6	0	0	4	6	3
PF3D7_0314700	RNF1	RING finger protein RNF1	3	2	0	3	3	5
PF3D7_0314800		conserved Plasmodium protein, unknown function	0	0	0	0	0	0
PF3D7_0314900		conserved Plasmodium membrane protein, unknown function	0	0	0	0	0	0
PF3D7_0315000		zinc finger protein, putative	0	1	0	0	0	0
PF3D7_0315100	eIF4E	eukaryotic translation initiation factor 4E	247	106	73	168	101	182
PF3D7_0315200	CTRP	circumsporozoite- and TRAP-related protein	70	8	12	43	9	17
PF3D7_0315300		conserved Plasmodium protein, unknown function	0	1	0	0	0	0
PF3D7_0315400		conserved Plasmodium protein, unknown function	1	1	0	0	4	0
PF3D7_0315500		ribosomal protein L47, mitochondrial, putative	0	0	0	0	0	0
PF3D7_0315600		zinc finger protein, putative	0	0	0	0	0	0
PF3D7_0315700		conserved Plasmodium membrane protein, unknown function	0	0	0	0	0	0
PF3D7_0315800		zinc finger protein, putative	46	4	4	29	15	53
PF3D7_0315900		conserved Plasmodium protein, unknown function	0	0	0	0	0	0
PF3D7_0316000	MA	microneme associated antigen	1	0	1	0	2	0
PF3D7_0316100		ribosomal protein L27, mitochondrial, putative	2	0	0	0	0	0
PF3D7_0316200		conserved Plasmodium protein, unknown function	0	0	0	0	1	0
PF3D7_0316300	PPase	inorganic pyrophosphatase, putative	2	1	2	0	2	3
PF3D7_0316400		CS domain-containing protein, putative	2	5	0	2	4	1
PF3D7_0316500	NUF2	kinetochore protein NUF2, putative	2	1	0	0	1	0
PF3D7_0316600	FNT	formate-nitrite transporter	726	214	93	400	379	452
PF3D7_0316700	YOP1	protein YOP1, putative	98	52	16	97	68	115
PF3D7_0316800		40S ribosomal protein S15A, putative	3103	1880	1112	2194	1571	2296
PF3D7_0316900		E3 ubiquitin-protein ligase, putative	28	2	3	20	4	13
PF3D7_0317000		proteasome subunit alpha type-3, putative	54	25	11	30	38	77
PF3D7_0317100	B9	6-cysteine protein	18	3	2	5	1	4
PF3D7_0317200	CRK4	cdc2-related protein kinase 4	5	5	1	4	1	4
PF3D7_0317300		conserved Plasmodium protein, unknown function	837	54	23	592	53	126
PF3D7_0317400		DNA replication complex GINS protein, putative	8	12	1	2	5	3
PF3D7_0317500	EG5	kinesin-5	77	2	0	53	5	22
PF3D7_0317600	RPS11	40S ribosomal protein S11, putative	4421	1614	1572	2604	2193	2108
PF3D7_0317700		CPSF (cleavage and polyadenylation specific factor), subunit A, putative	368	29	13	234	53	107
PF3D7_0317800		26S proteasome non-ATPase regulatory subunit 9, putative	46	8	0	29	7	32
PF3D7_0317900		conserved protein, unknown function	19	8	4	16	5	18
PF3D7_0318000		conserved Plasmodium protein, unknown function	1	0	0	0	0	0
PF3D7_0318100	STOML	stomatin-like protein, putative	10	27	3	8	14	25
PF3D7_0318200	RPB1	DNA-directed RNA polymerase II subunit RPB1	2014	445	248	1523	469	898
PF3D7_0318300		conserved Plasmodium protein, unknown function	198	38	15	177	62	64
PF3D7_0318400		coiled-coil domain-containing protein CCDC148/CCDC112, putative	0	0	0	0	1	0
PF3D7_0318500		conserved Plasmodium protein, unknown function	1	0	0	0	0	1
PF3D7_0318600		cleavage and polyadenylation specificity factor, putative	141	22	11	110	35	49
PF3D7_0318700		conserved Plasmodium protein, unknown function	0	0	0	0	0	0
PF3D7_0318800		triosephosphate isomerase, putative	0	0	0	0	0	0
PF3D7_0318900		conserved protein, unknown function	66	7	3	19	25	31
PF3D7_0319000	ATPase7	P4-type ATPase ATP7, putative	23	12	2	10	9	12
PF3D7_0319100	RBX1	E3 ubiquitin-protein ligase RBX1, putative	46	19	5	28	17	28
PF3D7_0319200	CCR4-4	CCR4 domain-containing protein 4, putative	80	6	1	44	11	31
PF3D7_0319300		ubiquitin-conjugating enzyme E2, putative	31	18	9	19	15	32
PF3D7_0319400		kinesin-8X	0	0	0	0	1	1
PF3D7_0319500		RNA-binding protein, putative	569	144	86	422	212	250
PF3D7_0319600	EF-1delta	elongation factor 1-delta, putative	614	396	193	385	296	710
PF3D7_0319700	ABCI3	ABC transporter I family member 1, putative	246	31	8	158	41	98
PF3D7_0319800		conserved Plasmodium protein, unknown function	0	0	0	0	0	0
PF3D7_0319900		conserved protein, unknown function	83	19	24	62	44	77
PF3D7_0320000	I2	protein phosphatase inhibitor 2	1	9	0	4	11	7
PF3D7_0320100	SEC22	protein transport protein SEC22	41	28	21	36	17	77
PF3D7_0320200		CPW-WPC family protein	0	0	0	0	0	0
PF3D7_0320300	CCT5	T-complex protein 1 subunit epsilon	601	391	162	389	281	550
PF3D7_0320400	Cap380	oocyst capsule protein Cap380	6	2	1	2	0	0
PF3D7_0320500	Nico	nicotinamidase, putative	5	0	1	0	2	2
PF3D7_0320600		conserved protein, unknown function	0	0	0	0	0	0
PF3D7_0320700	SPC25	signal peptidase complex subunit 2	1	6	1	0	1	2
PF3D7_0320800	DOZI	ATP-dependent RNA helicase DDX6	11	31	3	5	10	5
PF3D7_0320900	H2A.Z	histone H2A.Z	3314	1211	1630	2001	1483	1182
PF3D7_0321000		conserved protein, unknown function	53	7	1	28	9	29
PF3D7_0321100		conserved Plasmodium protein, unknown function	0	0	0	1	0	0
PF3D7_0321200	ALG7	UDP-N-acetylglucosamine--dolichyl-phosphate N-acetylglucosaminephosphotransferase, putative	0	0	0	0	0	0
PF3D7_0321300		conserved Plasmodium protein, unknown function	0	0	0	1	0	0
PF3D7_0321400	pPK1	pseudo protein kinase 1, putative	0	0	0	1	2	0
PF3D7_0321500		peptidase, putative	5	6	0	4	1	3
PF3D7_0321600	DDX42	ATP-dependent RNA helicase DDX42, putative	43	10	2	12	13	16
PF3D7_0321700		conserved Plasmodium protein, unknown function	1	0	0	1	0	0
PF3D7_0321800		WD repeat-containing protein, putative	480	50	7	395	62	133
PF3D7_0321900	CARL	cyclic amine resistance locus protein	152	21	16	118	42	86
PF3D7_0322000	CYP19A	peptidyl-prolyl cis-trans isomerase	2862	1229	550	1984	1193	1732
PF3D7_0322100	Prt1	mRNA-capping enzyme subunit beta	61	10	6	65	29	53
PF3D7_0322200		conserved protein, unknown function	1	0	0	0	0	0
PF3D7_0322300	DGAT	diacylglycerol O-acyltransferase	13	6	0	6	7	11
PF3D7_0322400		regulator of initiation factor 2 (eIF2)	58	2	1	39	11	9
PF3D7_0322500	IscA2	iron-sulfur assembly protein, putative	2	0	0	2	0	0
PF3D7_0322600		conserved Plasmodium protein, unknown function	1	0	0	0	0	1
PF3D7_0322700		conserved Plasmodium protein, unknown function	173	9	6	149	24	50
PF3D7_0322800		conserved Plasmodium protein, unknown function	0	0	0	0	0	0
PF3D7_0322900	RPS3A	40S ribosomal protein S3A, putative	3658	1805	1154	2355	1506	2440
PF3D7_0323000	TMA7	translation machinery-associated protein 7, putative	193	107	48	137	125	186
PF3D7_0323100		conserved Plasmodium protein, unknown function	179	21	10	121	47	62
PF3D7_0323200		conserved Plasmodium protein, unknown function	2	0	0	0	0	1
PF3D7_0323300		conserved protein, unknown function	1	0	0	1	0	0
PF3D7_0323400	RIPR	Rh5 interacting protein	2	0	1	0	0	1
PF3D7_0323500	SMN	survival motor neuron-like protein	31	16	7	30	10	35
PF3D7_0323600		BSD domain-containing protein, putative	11	1	0	5	5	4
PF3D7_0323700	SART1	U4/U6.U5 tri-snRNP-associated protein 1, putative	44	6	0	38	4	36
PF3D7_0323800		conserved Plasmodium protein, unknown function	133	12	2	67	10	32
PF3D7_0324000	EPF1	exported protein family 1	0	0	0	0	0	0
PF3D7_0324100	MC-2TM	Pfmc-2TM Maurer's cleft two transmembrane protein	0	0	0	0	0	0
PF3D7_0324200	EPF3	exported protein family 3	0	0	0	0	0	0
PF3D7_0324300	EPF4	exported protein family 4	1	0	0	1	0	0
PF3D7_0324400	RIF	rifin	0	0	0	1	0	0
PF3D7_0324500	RIF	rifin	0	0	0	0	0	0
PF3D7_0324600		stevor	0	0	0	0	1	0
PF3D7_0324800	RIF	rifin	2	0	0	3	9	1
PF3D7_0324900	VAR	erythrocyte membrane protein 1, PfEMP1	24	5	4	192	83	99
PF3D7_0400100	VAR	erythrocyte membrane protein 1, PfEMP1	9	5	2	157	58	81
PF3D7_0400300	RIF	rifin	0	1	1	1	7	0
PF3D7_0400400	VAR	erythrocyte membrane protein 1, PfEMP1	9	0	1	77	29	26
PF3D7_0400500	RIF	rifin	0	0	0	0	0	0
PF3D7_0400700	RIF	rifin	0	0	0	1	0	0
PF3D7_0400800		stevor	0	0	0	0	0	0
PF3D7_0400900	RIF	rifin	0	0	0	0	2	0
PF3D7_0401000	RIF	rifin	0	0	0	0	0	0
PF3D7_0401100		Plasmodium exported protein, unknown function, fragment	0	0	0	0	0	0
PF3D7_0401200	RIF	rifin	1	0	0	0	0	0
PF3D7_0401300	RIF	rifin	0	0	0	1	1	1
PF3D7_0401400	RIF	rifin	0	0	0	0	1	0
PF3D7_0401600	RIF	rifin	457	277	127	249	210	393
PF3D7_0401800	PfD80	Plasmodium exported protein (PHISTb), unknown function	195	90	58	214	916	150
PF3D7_0401900	ACS6	acyl-CoA synthetase	1	0	0	20	2	8
PF3D7_0402000		Plasmodium exported protein (PHISTa), unknown function	113	71	2	31	71	44
PF3D7_0402100		Plasmodium exported protein (PHISTb), unknown function	194	76	37	187	68	288
PF3D7_0402300	RH1	reticulocyte binding protein homologue 1	0	0	0	0	0	0
PF3D7_0402400	GEXP18	Plasmodium exported protein, unknown function	53	1	2	25	18	10
PF3D7_0402600		stevor	0	0	0	0	0	0
PF3D7_0402900		probable protein, unknown function	0	0	0	0	1	0
PF3D7_0403100		regulator of chromosome condensation, putative	0	2	1	5	2	5
PF3D7_0403200		pre-mRNA splicing factor, putative	308	18	12	263	57	101
PF3D7_0403300		conserved Plasmodium protein, unknown function	1	0	0	0	2	0
PF3D7_0403400		conserved Plasmodium protein, unknown function	219	12	3	127	9	46
PF3D7_0403500		ubiquitin specific protease, putative	3	0	0	1	1	0
PF3D7_0403600		conserved Plasmodium protein, unknown function	3	1	0	0	1	0
PF3D7_0403700	CLF1	pre-mRNA-splicing factor CLF1, putative	474	155	43	350	186	358
PF3D7_0403800		alpha/beta hydrolase, putative	153	41	25	100	29	68
PF3D7_0403900	SET8	SET domain protein, putative	2	0	0	0	0	0
PF3D7_0404000		conserved Plasmodium protein, unknown function	0	0	0	0	0	0
PF3D7_0404100	ApiAP2	AP2 domain transcription factor AP2-SP2, putative	0	0	0	0	0	0
PF3D7_0404200		conserved Plasmodium protein, unknown function	1	0	0	0	0	0
PF3D7_0404300		conserved Plasmodium protein, unknown function	660	57	19	545	140	195
PF3D7_0404400	P36	6-cysteine protein P36	0	0	0	0	0	0
PF3D7_0404500	P52	6-cysteine protein P52	10	1	1	7	5	22
PF3D7_0404600		conserved Plasmodium membrane protein, unknown function	60	3	1	145	22	55
PF3D7_0404700	DPAP3	dipeptidyl aminopeptidase 3	4	0	0	1	0	0
PF3D7_0404800		sporozoite-specific protein S10, putative	23	0	1	7	0	2
PF3D7_0404900	P41	6-cysteine protein P41	75	8	7	33	13	16
PF3D7_0405000	DDX51	ATP-dependent RNA helicase DDX51, putative	153	47	14	103	54	104
PF3D7_0405100	SEC24B	protein transport protein Sec24B, putative	204	46	39	158	85	149
PF3D7_0405200	CERLI2	protein CERLI2	7	2	0	6	8	6
PF3D7_0405300	LISP2	liver specific protein 2, putative	2	0	0	0	0	0
PF3D7_0405400	PRPF8	pre-mRNA-processing-splicing factor 8, putative	2754	596	387	2023	494	1228
PF3D7_0405500		conserved Plasmodium protein, unknown function	15	6	5	11	10	31
PF3D7_0405600		TMEM33 domain-containing protein, putative	6	3	1	5	10	5
PF3D7_0405700		lysine decarboxylase, putative	27	35	0	7	7	13
PF3D7_0405800		conserved protein, unknown function	0	0	0	0	0	0
PF3D7_0405900	ASP	apical sushi protein	1	0	0	0	0	0
PF3D7_0406000		conserved protein, unknown function	52	27	10	43	23	47
PF3D7_0406100		V-type proton ATPase subunit B	1780	696	428	1244	969	964
PF3D7_0406200	Pfs16	parasitophorous vacuole membrane protein S16	1608	472	358	466	445	291
PF3D7_0406400	cGLO2	cytosolic glyoxalase II	457	308	168	320	332	389
PF3D7_0406500		NYN domain-containing protein, putative	1953	50	42	1637	163	230
PF3D7_0406600		conserved protein, unknown function	0	0	0	0	0	0
PF3D7_0406700		KLRAQ domain-containing protein, putative	0	0	0	0	0	0
PF3D7_0406800		ribosomal protein L25, putative	2	1	0	0	0	0
PF3D7_0406900		conserved Plasmodium protein, unknown function	10	0	0	4	1	1
PF3D7_0407000		conserved Plasmodium protein, unknown function	9	1	1	5	4	3
PF3D7_0407100		methyltransferase, putative	5	2	0	2	3	1
PF3D7_0407200	PTH2	peptidyl-tRNA hydrolase 2, putative	186	91	70	93	91	129
PF3D7_0407300		transcription factor, putative	160	64	33	126	90	76
PF3D7_0407400		conserved Plasmodium protein, unknown function	2	2	1	1	4	2
PF3D7_0407500		mitochondrial carrier protein, putative	6	1	1	6	0	1
PF3D7_0407600		conserved Plasmodium protein, unknown function	0	0	0	0	0	0
PF3D7_0407700		conserved Plasmodium protein, unknown function	0	0	0	2	2	0
PF3D7_0407800	CINCH	protein CINCH	0	0	1	1	1	3
PF3D7_0407900		AAA family ATPase, putative	16	2	0	6	1	10
PF3D7_0408000		conserved Plasmodium protein, unknown function	3	2	1	1	0	1
PF3D7_0408100		conserved Plasmodium protein, unknown function	45	1	0	33	6	12
PF3D7_0408200		conserved Plasmodium protein, unknown function	4	0	0	1	0	0
PF3D7_0408300	ZRANB2	zinc finger Ran-binding domain-containing protein 2, putative	187	49	29	120	83	113
PF3D7_0408400		conserved protein, unknown function	0	0	0	1	0	0
PF3D7_0408500	FEN1	flap endonuclease 1	1	2	0	0	0	0
PF3D7_0408600	SIAP1	sporozoite invasion-associated protein 1	0	0	0	0	0	0
PF3D7_0408700	PLP1	perforin-like protein 1	0	0	0	0	0	0
PF3D7_0408800		conserved Plasmodium protein, unknown function	0	0	0	0	0	0
PF3D7_0408900	KAE1	tRNA N6-adenosine threonylcarbamoyltransferase	0	0	0	0	0	2
PF3D7_0409000		conserved Plasmodium protein, unknown function	4	0	0	1	0	0
PF3D7_0409100	PRPF31	U4/U6 small nuclear ribonucleoprotein PRP31, putative	182	36	17	122	58	143
PF3D7_0409200	SOF1	protein SOF1, putative	124	85	34	102	41	185
PF3D7_0409300		methyltransferase, putative	19	3	1	19	4	16
PF3D7_0409400	DnaJ	chaperone protein DnaJ	153	46	16	110	50	78
PF3D7_0409500		NAD(P)-binding protein, putative	2	0	0	0	0	0
PF3D7_0409600	RPA1	replication protein A1, large subunit	9	6	3	5	8	6
PF3D7_0409700	RF2	peptide chain release factor 2	2	2	2	0	4	3
PF3D7_0409800		zinc finger protein, putative	110	11	6	44	12	46
PF3D7_0409900	ALP5b	actin-like protein, putative	0	1	0	0	0	0
PF3D7_0410000	EVP1	erythrocyte vesicle protein 1	529	71	55	289	153	178
PF3D7_0410300	PPM1	protein phosphatase PPM1, putative	122	33	22	93	49	95
PF3D7_0410400	RRP4	exosome complex component RRP4	17	13	5	24	13	32
PF3D7_0410500		conserved Plasmodium protein, unknown function	2	0	0	0	0	1
PF3D7_0410600	ATRP	armadillo-type repeat protein ATRP	63	51	18	44	35	93
PF3D7_0410700	RbgA	ribosome biogenesis GTPase A, putative	1	1	0	0	1	1
PF3D7_0410800		conserved Plasmodium protein, unknown function	34	7	0	24	9	19
PF3D7_0410900		conserved Plasmodium protein, unknown function	121	15	4	49	25	58
PF3D7_0411000		conserved Plasmodium protein, unknown function	3010	305	202	2218	776	1422
PF3D7_0411100	MED8	mediator of RNA polymerase II transcription subunit 8, putative	0	0	0	0	0	0
PF3D7_0411200		PP-loop family protein, putative	5	1	0	2	1	2
PF3D7_0411300		conserved Plasmodium protein, unknown function	0	1	0	2	0	5
PF3D7_0411400		DEAD box ATP-dependent RNA helicase, putative	10	2	0	14	1	6
PF3D7_0411700		conserved Plasmodium protein, unknown function	0	0	0	0	0	0
PF3D7_0411800		conserved Plasmodium protein, unknown function	0	1	0	0	1	0
PF3D7_0411900		DNA polymerase alpha catalytic subunit A	9	1	0	2	1	4
PF3D7_0412000		LITAF-like zinc finger protein, putative	4	4	0	0	2	1
PF3D7_0412100	mtRPS12	ribosomal protein S12, mitochondrial	11	1	2	1	2	14
PF3D7_0412200		conserved Plasmodium protein, unknown function	1	1	2	1	0	1
PF3D7_0412300		phosphopantothenoylcysteine synthetase, putative	2	1	0	2	0	0
PF3D7_0412400	VAR	erythrocyte membrane protein 1, PfEMP1	11	3	3	2810	978	1210
PF3D7_0412700	VAR	erythrocyte membrane protein 1, PfEMP1	2	1	3	537	226	176
PF3D7_0412900	VAR	erythrocyte membrane protein 1, PfEMP1	0	0	0	10	4	2
PF3D7_0413100	VAR	erythrocyte membrane protein 1, PfEMP1	0	0	0	11	6	6
PF3D7_0413200	RIF	rifin	0	0	0	0	0	0
PF3D7_0413300	RIF	rifin	0	0	0	0	0	0
PF3D7_0413500	PGM2	phosphoglucomutase-2	0	0	0	0	0	1
PF3D7_0413600	RPT3	26S protease regulatory subunit 6B, putative	265	217	102	219	156	267
PF3D7_0413700		lysine decarboxylase-like protein, putative	3	5	1	0	4	2
PF3D7_0413800		50S ribosomal protein L10, putative	0	0	0	1	0	0
PF3D7_0413900	USP13	ubiquitin carboxyl-terminal hydrolase 13, putative	54	14	4	37	16	33
PF3D7_0414000	SMC3	structural maintenance of chromosomes protein 3	3	1	0	0	0	2
PF3D7_0414100		conserved Plasmodium membrane protein, unknown function	1	0	0	0	2	0
PF3D7_0414200		calmodulin-like protein	0	0	0	0	0	0
PF3D7_0414300		Rab5-interacting protein, putative	9	4	6	3	7	7
PF3D7_0414400		conserved Plasmodium protein, unknown function	0	0	0	0	0	0
PF3D7_0414500		RNA-binding protein, putative	0	0	0	0	0	0
PF3D7_0414600	APH	acylated pleckstrin-homology domain-containing protein, putative	1	2	0	1	1	1
PF3D7_0414700		GTP-binding protein, putative	1	0	0	0	0	0
PF3D7_0414800		conserved Plasmodium protein, unknown function	0	0	0	0	0	0
PF3D7_0414900	ARO	armadillo-domain containing rhoptry protein	3	6	9	3	1	2
PF3D7_0415000	GET3	ATPase GET3	75	50	23	66	47	103
PF3D7_0415100		conserved protein, unknown function	21	0	0	10	7	6
PF3D7_0415200		conserved Plasmodium protein, unknown function	1	0	0	2	0	2
PF3D7_0415300	CRK3	cdc2-related protein kinase 3	1058	102	69	701	258	241
PF3D7_0415400		coatomer subunit zeta, putative	49	23	15	44	21	57
PF3D7_0415500	CBP20	nuclear cap-binding protein subunit 2, putative	172	37	29	107	64	96
PF3D7_0415600	GAK	GTP:AMP phosphotransferase	2	6	1	0	1	3
PF3D7_0415700		conserved Plasmodium protein, unknown function	0	0	0	0	0	0
PF3D7_0415800		PhIL1-interacting candidate PIC3	1	0	0	0	0	0
PF3D7_0415900		60S ribosomal protein L15, putative	6140	1525	1325	3711	2488	2568
PF3D7_0416000		RNA-binding protein, putative	44	25	3	73	54	54
PF3D7_0416100	GATA	glutamyl-tRNA(Gln) amidotransferase subunit A	3	8	3	5	7	8
PF3D7_0416200		PRKR-interacting protein 1, putative	76	2	4	63	22	48
PF3D7_0416300	MCM9	DNA helicase MCM9, putative	4	0	0	5	3	2
PF3D7_0416400	HAT1	histone acetyltransferase, putative	74	34	2	41	36	32
PF3D7_0416500	MAF1	repressor of RNA polymerase III transcription MAF1	0	0	0	0	0	0
PF3D7_0416600	PHBL	prohibitin-like protein PHBL, putative	0	0	0	0	0	0
PF3D7_0416700		CDGSH iron-sulfur domain-containing protein, putative	2	5	2	1	6	16
PF3D7_0416800	SAR1	small GTP-binding protein sar1	773	313	189	516	499	446
PF3D7_0416900		conserved Plasmodium protein, unknown function	118	12	5	90	16	23
PF3D7_0417000		conserved Plasmodium protein, unknown function	0	0	0	0	0	0
PF3D7_0417100	PUF2	mRNA-binding protein PUF2	0	0	0	0	0	0
PF3D7_0417200	DHFR-TS	bifunctional dihydrofolate reductase-thymidylate synthase	0	1	1	0	1	1
PF3D7_0417300		LETM1-like protein, putative	83	9	3	48	15	58
PF3D7_0417400		conserved Plasmodium protein, unknown function	860	45	13	605	99	161
PF3D7_0417500		memo-like protein	5	12	1	1	15	4
PF3D7_0417600		conserved Plasmodium protein, unknown function	0	0	0	0	0	0
PF3D7_0417700		conserved Plasmodium protein, unknown function	0	0	0	0	0	0
PF3D7_0417800	CRK1	cdc2-related protein kinase 1	41	8	1	20	12	22
PF3D7_0417900		conserved Plasmodium protein, unknown function	1	0	0	0	0	1
PF3D7_0418000		conserved Plasmodium protein, unknown function	2	0	0	0	0	0
PF3D7_0418100	SOC1	protein SOC1, putative	340	48	22	152	46	92
PF3D7_0418200	EIF3M	eukaryotic translation initiation factor 3 subunit M, putative	309	50	31	182	135	152
PF3D7_0418300		conserved Plasmodium protein, unknown function	6664	1048	569	3112	977	1226
PF3D7_0418400		LSM domain-containing protein, putative	5	7	3	2	5	20
PF3D7_0418500	BET3	trafficking protein particle complex subunit 3, putative	17	19	4	10	7	22
PF3D7_0418600		regulator of chromosome condensation, putative	3	1	0	0	0	4
PF3D7_0418700		RNA-binding protein NOB1, putative	80	41	9	54	23	111
PF3D7_0418800		MOLO1 domain-containing protein, putative	0	0	0	0	0	0
PF3D7_0418900		conserved protein, unknown function	0	0	0	0	0	0
PF3D7_0419000		conserved Plasmodium protein, unknown function	0	0	0	0	0	0
PF3D7_0419100		conserved Plasmodium protein, unknown function	2	5	0	2	1	0
PF3D7_0419200		conserved Plasmodium protein, unknown function	7	2	2	5	6	5
PF3D7_0419300	GOT1	protein transport protein GOT1, putative	1	0	0	0	2	0
PF3D7_0419400		conserved Plasmodium protein, unknown function	0	3	0	0	0	2
PF3D7_0419500		conserved Plasmodium membrane protein, unknown function	10	0	0	3	1	1
PF3D7_0419600	RANBP1	ran-specific GTPase-activating protein 1, putative	2058	373	206	1530	587	778
PF3D7_0419700	Pf34	apical merozoite protein	3	0	0	0	0	1
PF3D7_0419800		60S ribosomal protein L7ae/L30e, putative	93	9	8	70	42	47
PF3D7_0419900		phosphatidylinositol 4-kinase, putative	567	22	13	366	35	112
PF3D7_0420000		zinc finger protein, putative	266	18	5	216	18	61
PF3D7_0420100	RIO2	serine/threonine protein kinase RIO2	226	34	13	150	53	81
PF3D7_0420200	ACPS	holo-[acyl-carrier-protein] synthase, putative	7	0	0	3	0	1
PF3D7_0420300	ApiAP2	AP2 domain transcription factor, putative	1157	123	28	877	90	257
PF3D7_0420400	RRF2	ribosome-recycling factor	12	3	1	2	5	9
PF3D7_0420500		conserved Plasmodium protein, unknown function	0	0	0	0	0	0
PF3D7_0420600		conserved Plasmodium protein, unknown function	0	0	0	0	0	0
PF3D7_0420700	VAR	erythrocyte membrane protein 1, PfEMP1	3	0	0	118	46	44
PF3D7_0420900	VAR	erythrocyte membrane protein 1, PfEMP1	0	0	0	22	11	7
PF3D7_0421100	VAR	erythrocyte membrane protein 1, PfEMP1	0	0	1	77	25	26
PF3D7_0421200	RIF	rifin	0	0	0	2	1	0
PF3D7_0421300	VAR	erythrocyte membrane protein 1, PfEMP1	6	2	1	1037	352	305
PF3D7_0421700		conserved Plasmodium protein, unknown function	0	0	0	0	0	0
PF3D7_0421800		conserved Plasmodium protein, unknown function	0	0	0	0	0	0
PF3D7_0421900		conserved Plasmodium protein, unknown function	0	0	0	0	0	0
PF3D7_0422000		steroid dehydrogenase, putative	10	8	1	4	2	5
PF3D7_0422100		transmembrane emp24 domain-containing protein, putative	81	17	7	36	28	35
PF3D7_0422200		erythrocyte membrane-associated antigen	127	5	2	97	9	12
PF3D7_0422300		alpha tubulin 2	9	4	3	6	2	2
PF3D7_0422400	RPS19	40S ribosomal protein S19	2614	2114	1013	1889	1289	3178
PF3D7_0422500	BRR2	pre-mRNA-splicing helicase BRR2, putative	1340	108	52	854	161	277
PF3D7_0422600		conserved Plasmodium protein, unknown function	2	3	1	3	0	1
PF3D7_0422700	EIF4A3	eukaryotic initiation factor 4A-III, putative	405	256	136	276	135	309
PF3D7_0422800	SR12	serpentine receptor 12, putative	0	0	0	0	0	1
PF3D7_0422900		methyltransferase, putative	0	0	0	0	0	1
PF3D7_0423000		conserved Plasmodium protein, unknown function	0	0	0	0	0	0
PF3D7_0423100		AP-4 complex subunit sigma, putative	44	7	4	22	17	31
PF3D7_0423200		BSD-domain protein, putative	1	1	0	3	4	2
PF3D7_0423300		conserved Plasmodium protein, unknown function	0	0	0	0	0	0
PF3D7_0423400	AARP	apical asparagine-rich protein AARP	1	2	1	0	0	0
PF3D7_0423500	GAPM2	glideosome associated protein with multiple membrane spans 2	4	8	7	6	5	1
PF3D7_0423600		conserved Plasmodium protein, unknown function	316	22	6	211	50	69
PF3D7_0423700	ETRAMP4	early transcribed membrane protein 4	6	23	3	3	6	5
PF3D7_0423800	CyRPA	cysteine-rich protective antigen	1	2	1	2	3	1
PF3D7_0423900		probable protein, unknown function	6	0	1	0	3	7
PF3D7_0424000		Plasmodium exported protein (PHISTc), unknown function	284	289	51	48	218	133
PF3D7_0424100	RH5	reticulocyte binding protein homologue 5	0	0	0	0	1	0
PF3D7_0424200	RH4	reticulocyte binding protein homologue 4	2	0	0	0	0	0
PF3D7_0424400	SURF4.2	surface-associated interspersed protein 4.2 (SURFIN 4.2)	2	0	0	3	0	0
PF3D7_0424500	FIKK4.1	serine/threonine protein kinase, FIKK family	141	29	13	126	37	212
PF3D7_0424600		Plasmodium exported protein (PHISTb)	648	191	201	447	276	596
PF3D7_0424700	FIKK4.2	serine/threonine protein kinase, FIKK family	8131	1098	663	4300	2018	1879
PF3D7_0424800		Plasmodium exported protein (PHISTb), unknown function	6	2	1	9	4	9
PF3D7_0424900		Plasmodium exported protein (PHISTa), unknown function	12	1	1	25	24	56
PF3D7_0425100		Plasmodium exported protein (hyp6), unknown function	1	0	0	0	0	0
PF3D7_0425200		Plasmodium exported protein (hyp15), unknown function	2	0	1	3	1	1
PF3D7_0425400		Plasmodium exported protein (PHISTa), unknown function	3	0	0	1	2	1
PF3D7_0425500		stevor	0	0	0	0	2	0
PF3D7_0425700	RIF	rifin	0	0	0	1	0	0
PF3D7_0425800	VAR	erythrocyte membrane protein 1, PfEMP1	23	4	2	154	40	61
PF3D7_0425900	RIF	rifin	0	0	0	1	14	0
PF3D7_0426000	VAR	erythrocyte membrane protein 1, PfEMP1	12	3	10	203	77	72
PF3D7_0500100	VAR	erythrocyte membrane protein 1, PfEMP1	25	12	3	384	153	62
PF3D7_0500400	RIF	rifin	0	0	0	0	0	0
PF3D7_0500500	RIF	rifin	0	0	0	0	0	0
PF3D7_0500800	MESA	mature parasite-infected erythrocyte surface antigen	233	85	2	170	69	39
PF3D7_0500900	FIKK5	serine/threonine protein kinase, FIKK family	3	0	1	0	0	0
PF3D7_0501000		Plasmodium exported protein, unknown function	734	562	116	411	401	661
PF3D7_0501100	HSP40	heat shock protein 40, type II	1012	337	264	1075	376	814
PF3D7_0501200	PIESP2	parasite-infected erythrocyte surface protein	1051	1168	217	527	1655	719
PF3D7_0501300	SBP1	skeleton-binding protein 1	21317	1008	1452	13794	5782	5131
PF3D7_0501400	FIRA	interspersed repeat antigen	9102	134	252	8404	465	776
PF3D7_0501500	RAP3	rhoptry-associated protein 3	0	0	1	0	0	1
PF3D7_0501600	RAP2	rhoptry-associated protein 2	0	2	5	0	1	7
PF3D7_0501700	APC3	anaphase-promoting complex subunit 3, putative	0	0	0	0	0	0
PF3D7_0501800	CAF1A	chromatin assembly factor 1 subunit A	6	7	0	3	2	5
PF3D7_0501900	TRAPPC13	trafficking protein particle complex subunit 13, putative	3	1	0	2	0	1
PF3D7_0502000	VPS11	vacuolar protein sorting-associated protein 11, putative	39	0	0	20	8	6
PF3D7_0502100		HCNGP-like protein	4	0	0	0	1	2
PF3D7_0502200	MPV17	protein Mpv17, putative	12	4	0	7	5	2
PF3D7_0502300		conserved Plasmodium protein, unknown function	0	0	0	0	0	0
PF3D7_0502400	MSP8	merozoite surface protein 8	735	86	67	598	155	330
PF3D7_0502500		conserved Plasmodium protein, unknown function	1	0	0	0	0	0
PF3D7_0502600		conserved Plasmodium protein, unknown function	9	0	0	0	0	1
PF3D7_0502700		conserved protein, unknown function	23	6	6	14	7	8
PF3D7_0502800		DnaJ protein, putative	2	0	1	1	1	0
PF3D7_0502900		Tim10/DDP family zinc finger protein, putative	19	45	7	3	15	47
PF3D7_0503000		50S ribosomal protein L28, apicoplast, putative	11	5	1	5	4	7
PF3D7_0503100	IspE	4-diphosphocytidyl-2-C-methyl-D-erythritol kinase, putative	1	0	0	2	0	1
PF3D7_0503200	CDC6	cell division control protein 6, putative	0	1	0	0	0	2
PF3D7_0503300	SRSF12	serine/arginine-rich splicing factor 12	605	88	25	525	208	362
PF3D7_0503400	ADF1	actin-depolymerizing factor 1	2	10	4	1	6	4
PF3D7_0503500		protein kinase, putative	28	8	5	10	2	9
PF3D7_0503600	MyoB	myosin B	45	6	5	8	1	8
PF3D7_0503800	RPL31	60S ribosomal protein L31	806	594	263	476	394	985
PF3D7_0503900		conserved Plasmodium protein, unknown function	2	0	0	1	0	1
PF3D7_0504000	ATPase3	cation transporting P-ATPase	20	2	1	6	4	10
PF3D7_0504100		AN1-type zinc finger protein, putative	0	0	0	0	2	0
PF3D7_0504200	DDX27	ATP-dependent RNA helicase DDX27, putative	6	2	0	0	1	0
PF3D7_0504300		conserved Plasmodium protein, unknown function	0	0	0	0	0	0
PF3D7_0504400		ATP-dependent helicase, putative	0	2	1	1	1	0
PF3D7_0504500		MOLO1 domain-containing protein, putative	0	0	0	0	0	0
PF3D7_0504600	BCKDHB	2-oxoisovalerate dehydrogenase subunit beta, mitochondrial, putative	1	0	2	0	0	1
PF3D7_0504700	CEP120	centrosomal protein CEP120, putative	6	0	0	8	1	3
PF3D7_0504800		conserved Plasmodium protein, unknown function	3	0	0	0	0	1
PF3D7_0504900		transmembrane protein TMEM222, putative	0	0	0	0	1	0
PF3D7_0505000		MMS19-like protein, putative	311	17	7	202	34	70
PF3D7_0505100	TRS85	trafficking protein particle complex subunit 8, putative	223	25	16	180	59	86
PF3D7_0505200	ALP2b	actin-like protein, putative	9	13	1	3	7	2
PF3D7_0505300		UDP-N-acetylglucosamine transporter, putative	0	0	0	0	1	0
PF3D7_0505400		conserved protein, unknown function	0	2	0	0	2	0
PF3D7_0505500	MSH6	DNA mismatch repair protein MSH6, putative	15	4	2	10	7	7
PF3D7_0505600		BCNT domain-containing protein, putative	8	0	0	1	3	0
PF3D7_0505700		conserved Plasmodium membrane protein, unknown function	271	27	9	211	43	76
PF3D7_0505800	SUMO	small ubiquitin-related modifier	610	308	216	365	327	428
PF3D7_0505900	MED11	mediator of RNA polymerase II transcription subunit 11, putative	57	61	41	45	45	130
PF3D7_0506000		conserved Plasmodium protein, unknown function	13	6	1	12	8	10
PF3D7_0506100		60S ribosomal subunit protein L24, putative	26	3	0	9	5	7
PF3D7_0506200	TBP	TATA-box-binding protein	37	6	8	22	11	17
PF3D7_0506300		conserved protein, unknown function	0	1	0	0	0	0
PF3D7_0506400		conserved Plasmodium protein, unknown function	0	0	0	0	0	0
PF3D7_0506500		conserved Plasmodium protein, unknown function	225	10	4	87	11	27
PF3D7_0506700		GTPase-activating protein, putative	170	41	20	103	67	85
PF3D7_0506800	TCF25	transcription factor 25, putative	148	22	4	75	29	85
PF3D7_0506900	ROM4	rhomboid protease ROM4	42	4	5	6	2	10
PF3D7_0507000		conserved protein, unknown function	2	0	0	2	0	0
PF3D7_0507100	RPL4	60S ribosomal protein L4	8753	3106	2310	5470	3730	4515
PF3D7_0507200	SUB3	subtilisin-like protease 3	0	0	0	0	0	2
PF3D7_0507300	SOPT	subtilisin-like ookinete protein SOPT	2	0	0	0	0	0
PF3D7_0507400	SUB1-ProM	subtilisin propeptide-like protein	0	1	2	0	0	0
PF3D7_0507500	SUB1	subtilisin-like protease 1	17	2	3	2	1	9
PF3D7_0507600	CAF40	protein CAF40, putative	64	43	9	54	26	84
PF3D7_0507700	NPL4	nuclear protein localization protein 4, putative	34	6	3	10	12	38
PF3D7_0507800		conserved protein, unknown function	298	31	9	190	38	101
PF3D7_0507900		conserved Plasmodium protein, unknown function	4	4	5	3	7	22
PF3D7_0508000	P38	6-cysteine protein	0	0	0	0	0	0
PF3D7_0508100	SET9	SET domain protein, putative	2	3	2	4	2	1
PF3D7_0508200		longevity-assurance (LAG1) protein, putative	0	1	0	0	2	0
PF3D7_0508300	TPT	triose phosphate transporter	62	25	13	31	41	39
PF3D7_0508400		conserved protein, unknown function	2	1	1	2	0	4
PF3D7_0508500	ND6	ND6 protein, putative	102	9	9	74	16	52
PF3D7_0508600		conserved protein, unknown function	227	62	77	190	119	167
PF3D7_0508700	PRP5	pre-mRNA-processing ATP-dependent RNA helicase PRP5, putative	114	5	2	79	14	47
PF3D7_0508800	SSB	single-stranded DNA-binding protein	8	13	0	4	3	4
PF3D7_0508900	AAP6	protein AAP6	12	0	0	3	0	0
PF3D7_0509000	alphaSNAP	alpha-soluble NSF attachment protein, putative	54	51	14	37	32	78
PF3D7_0509100	SMC4	structural maintenance of chromosomes protein 4, putative	2	0	0	1	0	1
PF3D7_0509200	LRR2	leucine-rich repeat protein	0	0	0	0	0	0
PF3D7_0509300		conserved Plasmodium protein, unknown function	27	5	2	12	5	10
PF3D7_0509400	RNAPI	RNA polymerase I	933	89	44	729	173	313
PF3D7_0509500		ERCC4 domain-containing protein, putative	1	2	0	0	1	0
PF3D7_0509600	AsnRS	asparagine--tRNA ligase	28	16	4	18	8	43
PF3D7_0509700		conserved Plasmodium protein, unknown function	0	0	0	0	0	1
PF3D7_0509800	PI4KB	phosphatidylinositol 4-kinase beta	336	49	11	207	60	128
PF3D7_0509900		NSE4 domain-containing protein, putative	3	1	0	0	0	1
PF3D7_0510000		conserved Plasmodium protein, unknown function	3	0	0	1	0	0
PF3D7_0510100		KH domain-containing protein, putative	4	0	1	2	1	1
PF3D7_0510200	CYP87	peptidyl-prolyl cis-trans isomerase	87	28	15	79	31	34
PF3D7_0510300	SIP	stripes inner membrane complex protein, putative	0	2	0	0	0	0
PF3D7_0510400		PDCD2 domain-containing protein, putative	6	1	0	4	2	2
PF3D7_0510500	TopoI	topoisomerase I	70	11	1	29	19	30
PF3D7_0510700		conserved Plasmodium protein, unknown function	0	0	0	0	0	0
PF3D7_0510800		WD repeat-containing protein, putative	0	0	0	0	0	0
PF3D7_0511000	TCTP	translationally-controlled tumor protein homolog	534	359	147	340	311	451
PF3D7_0511100		conserved Plasmodium protein, unknown function	3	0	1	1	1	1
PF3D7_0511200	SCD	stearoyl-CoA desaturase	1	1	0	1	0	0
PF3D7_0511300		MORN repeat protein, putative	3	4	0	3	4	4
PF3D7_0511400		conserved Plasmodium protein, unknown function	0	0	0	0	2	0
PF3D7_0511500		RNA pseudouridylate synthase, putative	2270	67	24	1828	80	243
PF3D7_0511600	ARNP	apical rhoptry neck protein	0	0	0	1	0	1
PF3D7_0511700	CGI121	EKC/KEOPS complex subunit CGI121	3	1	0	5	2	1
PF3D7_0511800	INO1	inositol-3-phosphate synthase	294	189	71	340	208	613
PF3D7_0511900		conserved Plasmodium protein, unknown function	4	0	1	5	1	5
PF3D7_0512000	PFD6	prefoldin subunit 6	51	21	9	32	25	54
PF3D7_0512100		conserved protein, unknown function	1	0	0	0	1	0
PF3D7_0512200	GS	glutathione synthetase	19	6	2	11	13	16
PF3D7_0512300	MAT1	CDK-activating kinase assembly factor MAT1	10	3	1	11	4	16
PF3D7_0512400		conserved Plasmodium protein, unknown function	2	0	0	2	2	1
PF3D7_0512500		conserved Plasmodium protein, unknown function	0	0	0	0	0	0
PF3D7_0512600	RAB1b	ras-related protein Rab-1B	671	301	243	424	293	514
PF3D7_0512700	OPRT	orotate phosphoribosyltransferase	20	10	2	9	11	29
PF3D7_0512800		conserved Plasmodium protein, unknown function	20	10	0	9	1	14
PF3D7_0512900	AKAL	AKAP-like protein	1	1	0	0	0	0
PF3D7_0513000		conserved protein, unknown function	8	1	0	5	0	8
PF3D7_0513100		conserved protein, unknown function	26	3	6	19	9	22
PF3D7_0513200		CPSF domain-containing protein, putative	183	4	2	107	14	30
PF3D7_0513300	PNP	purine nucleoside phosphorylase	1597	1183	535	1385	1062	1864
PF3D7_0513400	YihA1	GTP-binding protein YihA1	5	6	1	4	2	8
PF3D7_0513500	PAM16	mitochondrial import inner membrane translocase subunit TIM16, putative	6	1	0	3	4	1
PF3D7_0513600		deoxyribodipyrimidine photo-lyase, putative	12	4	0	2	3	9
PF3D7_0513700	PSOP12	secreted ookinete protein, putative	0	0	0	0	0	0
PF3D7_0513800	RAB1a	ras-related protein Rab-1A	0	4	0	0	2	2
PF3D7_0513900		conserved protein, unknown function	1	1	0	0	0	0
PF3D7_0514000	TTL	tubulin--tyrosine ligase, putative	0	0	0	0	0	0
PF3D7_0514100	UvrD	ATP-dependent DNA helicase UvrD	3	3	0	0	2	1
PF3D7_0514200		conserved Plasmodium protein, unknown function	73	16	11	58	45	50
PF3D7_0514300		aspartate--tRNA ligase, putative	13	4	0	6	5	10
PF3D7_0514500		conserved Plasmodium membrane protein, unknown function	0	0	0	0	0	0
PF3D7_0514600		ribose-5-phosphate isomerase, putative	175	78	40	88	73	95
PF3D7_0514700		MORN repeat protein, putative	0	0	0	0	0	0
PF3D7_0514800		inositol polyphosphate multikinase, putative	12	1	1	9	5	3
PF3D7_0514900		conserved Plasmodium protein, unknown function	26	3	5	11	3	11
PF3D7_0515000	CWC2	pre-mRNA-splicing factor CWC2, putative	465	65	29	291	131	214
PF3D7_0515100	ROM9	rhomboid protease ROM9	0	0	0	1	2	0
PF3D7_0515200		conserved Plasmodium protein, unknown function	0	0	0	0	0	0
PF3D7_0515300	PI3K	phosphatidylinositol 3-kinase	146	11	9	108	28	54
PF3D7_0515400		conserved protein, unknown function	0	0	1	1	1	2
PF3D7_0515500	GEP1	gametogenesis essential protein 1, putative	0	0	0	0	0	0
PF3D7_0515600	GEP	gamete egress protein GEP, putative	0	0	0	1	0	0
PF3D7_0515700	GAP40	glideosome-associated protein 40, putative	11	9	8	3	5	7
PF3D7_0515800		BolA-like protein, putative	2	4	0	3	2	3
PF3D7_0515900	NIF2	NLI interacting factor-like phosphatase, putative	5	4	1	1	1	2
PF3D7_0516000		RAP protein, putative	7	10	0	2	4	3
PF3D7_0516100	ATPase1	cation-transporting ATPase 1	1	0	0	0	0	0
PF3D7_0516200	RPS11	40S ribosomal protein S11	5049	1344	1729	2832	2462	1911
PF3D7_0516300		tRNA pseudouridine synthase, putative	298	44	31	113	45	127
PF3D7_0516400	PhLP1	phosducin-like protein 1, putative	26	4	3	21	8	8
PF3D7_0516500	MFS1	major facilitator superfamily domain-containing protein, putative	0	1	0	0	0	0
PF3D7_0516600	MB2	sporozoite surface antigen MB2	56	5	0	43	10	19
PF3D7_0516700		ubiquitin carboxyl-terminal hydrolase 2, putative	250	41	25	123	55	147
PF3D7_0516800	ApiAP2	AP2 domain transcription factor AP2-O2, putative	1	0	1	2	0	1
PF3D7_0516900	RPL2	60S ribosomal protein L2	11263	3441	3872	5962	5263	3699
PF3D7_0517000		60S ribosomal protein L12, putative	1424	704	255	1067	624	1415
PF3D7_0517100		conserved protein, unknown function	9	2	1	3	2	10
PF3D7_0517200		conserved Plasmodium protein, unknown function	171	4	9	84	8	54
PF3D7_0517300	SR1	serine/arginine-rich splicing factor 1	6621	1050	1219	4347	1998	2125
PF3D7_0517400	FACT-L	FACT complex subunit SPT16, putative	201	48	18	117	72	84
PF3D7_0517500		UTP--glucose-1-phosphate uridylyltransferase, putative	16	2	0	2	2	2
PF3D7_0517600	CPbeta	F-actin-capping protein subunit beta, putative	10	1	3	2	1	6
PF3D7_0517700	EIF3B	eukaryotic translation initiation factor 3 subunit B, putative	599	338	102	346	240	790
PF3D7_0517800	DCX	apicortin	0	0	0	0	0	0
PF3D7_0517900		zinc finger protein, putative	6	1	2	5	1	13
PF3D7_0518000		NOSIP domain-containing protein, putative	115	34	43	60	54	85
PF3D7_0518100	AMR2	protein AMR2	28	14	1	11	10	27
PF3D7_0518200	MDM2	SWIB/MDM2 domain-containing protein	0	1	0	0	0	0
PF3D7_0518300		proteasome subunit beta type-1, putative	138	143	56	83	122	153
PF3D7_0518400	CYC3	cyclin, putative	1	0	0	2	1	2
PF3D7_0518500	DDX23	ATP-dependent RNA helicase DDX23, putative	595	113	79	444	164	230
PF3D7_0518600	WDR26	WD repeat-containing protein 26, putative	3	1	0	1	0	2
PF3D7_0518700	PUF1	mRNA-binding protein PUF1	25	1	1	16	1	4
PF3D7_0518800	PSOP13	secreted ookinete protein, putative	0	0	0	0	0	0
PF3D7_0518900		conserved protein, unknown function	0	0	0	0	0	1
PF3D7_0519000	SLBP	histone RNA hairpin-binding protein, putative	0	2	0	0	0	0
PF3D7_0519100		50S ribosomal protein L14, mitochondrial, putative	0	0	0	0	0	0
PF3D7_0519200		V-type proton ATPase 16 kDa proteolipid subunit	1231	614	528	728	641	587
PF3D7_0519300	COX10	protoheme IX farnesyltransferase	1	2	0	0	0	0
PF3D7_0519400	RPS24	40S ribosomal protein S24	2882	1098	1026	1757	1563	1702
PF3D7_0519500	CCR4-1	CCR4 domain-containing protein 1, putative	212	24	8	104	28	48
PF3D7_0519600		zinc finger protein, putative	106	22	7	64	34	75
PF3D7_0519700		FoP domain-containing protein, putative	151	17	6	98	42	127
PF3D7_0519800		EELM2 domain-containing protein, putative	1197	285	125	948	368	602
PF3D7_0519900		conserved protein, unknown function	5	0	0	2	1	1
PF3D7_0520000	RPS9	40S ribosomal protein S9, putative	3360	2205	1271	2256	1741	3330
PF3D7_0520100	PPM9	protein phosphatase PPM9, putative	216	42	20	125	59	62
PF3D7_0520200	MED17	mediator of RNA polymerase II transcription subunit 17, putative	12	10	0	10	9	15
PF3D7_0520300	LSM2	U6 snRNA-associated Sm-like protein LSm2, putative	33	7	4	19	9	39
PF3D7_0520400		single-stranded DNA-binding protein, putative	0	0	0	0	0	0
PF3D7_0520500		phosphomethylpyrimidine kinase, putative	8	0	0	1	2	6
PF3D7_0520600	Ap4AH	bis(5'-nucleosyl)-tetraphosphatase [asymmetrical]	269	78	33	148	62	229
PF3D7_0520700		CDC73 domain-containing protein, putative	23	1	0	13	3	3
PF3D7_0520800		conserved protein, unknown function	65	4	1	28	6	15
PF3D7_0520900	SAHH	adenosylhomocysteinase	1153	656	338	758	463	904
PF3D7_0521000		conserved Plasmodium protein, unknown function	25	4	0	20	5	25
PF3D7_0521100		conserved Plasmodium protein, unknown function	0	0	0	0	0	0
PF3D7_0521200		conserved protein, unknown function	0	0	0	0	0	0
PF3D7_0521300		zinc finger protein, putative	23	0	1	16	5	5
PF3D7_0521400		conserved protein, unknown function	6	0	0	3	2	0
PF3D7_0521500		ribosomal large subunit pseudouridylate synthase, putative	4	2	0	8	5	6
PF3D7_0521600		conserved Plasmodium protein, unknown function	0	0	0	0	0	0
PF3D7_0521700	DDX1	ATP-dependent RNA helicase DDX1, putative	87	40	14	69	47	50
PF3D7_0521800		AFG1-like ATPase, putative	1	3	1	0	0	0
PF3D7_0521900		conserved Plasmodium protein, unknown function	3	0	0	4	0	0
PF3D7_0522000		conserved Plasmodium protein, unknown function	14	1	1	5	10	5
PF3D7_0522100		conserved Plasmodium protein, unknown function	1	0	0	0	0	0
PF3D7_0522200	TAF10	transcription initiation factor TFIID subunit 10, putative	5	1	0	2	2	2
PF3D7_0522300		18S rRNA (guanine-N(7))-methyltransferase, putative	219	132	47	181	109	145
PF3D7_0522400		conserved Plasmodium protein, unknown function	0	0	0	1	0	1
PF3D7_0522500	RPL17	50S ribosomal protein L17, apicoplast, putative	0	0	0	1	1	0
PF3D7_0522600		magnesium transporter NIPA, putative	1	0	1	0	1	0
PF3D7_0522700	SufA	iron-sulfur cluster assembly protein SufA	0	0	0	0	0	0
PF3D7_0522800	BUD31	pre-mRNA-splicing factor BUD31, putative	105	31	16	59	32	90
PF3D7_0522900		zinc finger protein, putative	5	0	0	0	1	2
PF3D7_0523000	MDR1	multidrug resistance protein 1	1607	459	262	1000	421	1015
PF3D7_0523100	QCR2	mitochondrial-processing peptidase subunit alpha, putative	81	59	13	60	42	61
PF3D7_0523200		heptatricopeptide repeat-containing protein, putative	10	0	0	0	1	1
PF3D7_0523300	ApiCOX18	cytochrome c oxidase subunit ApiCOX18, putative	4	2	0	2	0	0
PF3D7_0523400		DnaJ protein, putative	145	67	32	102	63	112
PF3D7_0523500		dynein light chain Tctex-type, putative	0	0	0	0	0	0
PF3D7_0523600		conserved protein, unknown function	0	2	0	0	1	3
PF3D7_0523700		conserved Plasmodium membrane protein, unknown function	2	0	0	1	0	0
PF3D7_0523800		divalent metal transporter, putative	200	32	55	158	73	95
PF3D7_0523900		MerC domain-containing protein, putative	44	16	8	41	25	105
PF3D7_0524000	KASbeta	karyopherin beta	1412	334	106	894	379	1227
PF3D7_0524100		conserved Plasmodium protein, unknown function	94	5	1	64	8	32
PF3D7_0524200		conserved Plasmodium membrane protein, unknown function	0	0	0	0	0	0
PF3D7_0524300		conserved Plasmodium protein, unknown function	44	6	3	21	18	48
PF3D7_0524400	RBG1	ribosome-interacting GTPase 1, putative	826	349	282	687	412	498
PF3D7_0524500		conserved Plasmodium protein, unknown function	8	0	0	5	5	0
PF3D7_0524600		50S ribosomal protein L12, apicoplast, putative	0	2	0	0	0	2
PF3D7_0524700	TOM22	mitochondrial import receptor subunit TOM22, putative	34	18	5	17	13	36
PF3D7_0524800	UFD1	ubiquitin fusion degradation protein 1, putative	13	7	2	6	5	8
PF3D7_0524900	TYW1	S-adenosyl-L-methionine-dependent tRNA 4-demethylwyosine synthase, putative	454	58	23	319	111	151
PF3D7_0525000		zinc finger protein, putative	165	529	41	51	200	210
PF3D7_0525100	ACS10	acyl-CoA synthetase	470	365	127	341	159	529
PF3D7_0525200	SMC6	structural maintenance of chromosomes protein 6, putative	20	2	0	12	1	5
PF3D7_0525300		conserved protein, unknown function	0	0	0	0	0	0
PF3D7_0525400		7-helix-1 protein	0	1	0	0	0	0
PF3D7_0525500		WD repeat-containing protein, putative	48	1	0	19	4	11
PF3D7_0525600		RNA methyltransferase, putative	1	2	0	0	0	0
PF3D7_0525700		conserved protein, unknown function	4	4	0	0	1	1
PF3D7_0525800	IMC1g	inner membrane complex protein 1g, putative	2	16	7	3	1	11
PF3D7_0525900	NEK2	NIMA related kinase 2	0	0	0	0	0	0
PF3D7_0526000		RAP protein, putative	1	0	0	0	0	0
PF3D7_0526100		conserved Plasmodium membrane protein, unknown function	0	0	0	0	0	0
PF3D7_0526200	ARFGAP2	ADP-ribosylation factor GTPase-activating protein 2	9	8	0	0	2	4
PF3D7_0526300	WDR55	WD repeat-containing protein 55, putative	43	12	11	19	17	56
PF3D7_0526400		conserved Plasmodium protein, unknown function	0	0	0	1	0	1
PF3D7_0526500		conserved Plasmodium protein, unknown function	431	50	24	359	107	132
PF3D7_0526600		conserved Plasmodium protein, unknown function	12	6	0	9	2	5
PF3D7_0526700		conserved protein, unknown function	11	6	0	1	2	3
PF3D7_0526800		conserved Plasmodium protein, unknown function	465	113	60	489	212	324
PF3D7_0526900		transmembrane emp24 domain-containing protein, putative	158	57	24	125	37	225
PF3D7_0527000	MCM3	DNA replication licensing factor MCM3, putative	53	21	8	16	12	13
PF3D7_0527100	UBC13	ubiquitin-conjugating enzyme E2 13	492	140	113	313	192	242
PF3D7_0527200	USP14	ubiquitin carboxyl-terminal hydrolase 14	177	49	29	87	63	139
PF3D7_0527300	METAP1a	methionine aminopeptidase 1a, putative	107	44	18	68	45	64
PF3D7_0527400		conserved Plasmodium protein, unknown function	70	10	6	49	29	38
PF3D7_0527500	HIP	Hsc70-interacting protein	1847	470	305	1102	730	747
PF3D7_0527600		conserved Plasmodium protein, unknown function	9	10	1	8	6	22
PF3D7_0527900	DDX41	ATP-dependent RNA helicase DDX41, putative	432	112	95	257	119	263
PF3D7_0528000	UMP1	proteasome maturation factor UMP1, putative	7	6	1	2	3	3
PF3D7_0528100		AP-1/2 complex subunit beta, putative	422	141	99	255	127	243
PF3D7_0528200	EIF3E	eukaryotic translation initiation factor 3 subunit E, putative	242	88	42	157	98	323
PF3D7_0528300		conserved protein, unknown function	0	0	0	0	0	0
PF3D7_0528400	DHHC7	palmitoyltransferase DHHC7	1	0	1	1	1	0
PF3D7_0528500	CPalpha	F-actin-capping protein subunit alpha, putative	0	0	0	0	0	0
PF3D7_0528600		conserved Plasmodium protein, unknown function	8	6	4	12	7	27
PF3D7_0528700	CYP23	peptidyl-prolyl cis-trans isomerase	246	95	102	218	108	251
PF3D7_0528800		nuclear GTP-binding protein, putative	29	2	2	13	12	21
PF3D7_0528900		conserved protein, unknown function	2	0	0	0	1	0
PF3D7_0529000	TIP	T-cell immunomodulatory protein homolog, putative	112	53	22	69	18	94
PF3D7_0529100	ATrx2	thioredoxin-like protein, putative	2	5	2	1	5	2
PF3D7_0529200		sugar transporter, putative	0	1	0	0	0	0
PF3D7_0529300	TIC22	apicoplast TIC22 protein	0	2	0	0	0	0
PF3D7_0529400		conserved Plasmodium protein, unknown function	11	8	0	12	7	5
PF3D7_0529500		cell cycle regulator protein, putative	420	117	137	233	185	165
PF3D7_0529700		heptatricopeptide repeat-containing protein, putative	1	2	0	0	0	0
PF3D7_0529800		conserved Plasmodium protein, unknown function	5	1	0	1	1	0
PF3D7_0529900		RING zinc finger protein, putative	480	182	132	294	170	256
PF3D7_0530000		conserved Plasmodium protein, unknown function	29	9	9	44	10	41
PF3D7_0530100	SYN6	SNARE protein, putative	22	6	6	14	21	30
PF3D7_0530200	PPT	phosphoenolpyruvate/phosphate translocator	0	0	0	0	0	0
PF3D7_0530300	PIC6	PhIL1-interacting candidate PIC6	2	0	0	0	0	0
PF3D7_0530400		conserved Plasmodium protein, unknown function	2	0	0	1	0	1
PF3D7_0530500		conserved Plasmodium membrane protein, unknown function	0	0	0	0	0	0
PF3D7_0530600		XAP-5 DNA binding protein, putative	26	10	2	13	6	7
PF3D7_0530700		conserved Plasmodium protein, unknown function	114	8	2	87	29	26
PF3D7_0530750	DPM3	dolichol-phosphate mannosyltransferase subunit 3, putative	0	0	0	0	0	0
PF3D7_0530800		CPW-WPC family protein	4	0	0	4	1	4
PF3D7_0530900	FRM1	formin 1	1	1	0	2	1	0
PF3D7_0531000		SURF1 domain-containing protein, putative	13	6	1	23	6	4
PF3D7_0531100		conserved Plasmodium protein, unknown function	0	0	0	0	0	0
PF3D7_0531200		ribosomal protein S16, mitochondrial, putative	0	0	0	0	0	0
PF3D7_0531300		conserved Plasmodium protein, unknown function	0	0	0	0	0	0
PF3D7_0531400		G-patch domain-containing protein, putative	17	0	0	17	1	1
PF3D7_0532100	ETRAMP5	early transcribed membrane protein 5	10418	4425	2207	6841	5353	4398
PF3D7_0532200		Plasmodium exported protein (PHISTc), unknown function	22	5	4	11	11	19
PF3D7_0532300		Plasmodium exported protein (PHISTb), unknown function	1278	893	280	1567	1097	3231
PF3D7_0532400	LyMP	lysine-rich membrane-associated PHISTb protein	0	0	0	0	0	0
PF3D7_0532500		Plasmodium exported protein, unknown function	0	0	0	0	0	0
PF3D7_0532600		Plasmodium exported protein, unknown function	0	0	0	0	0	0
PF3D7_0532900	RIF	rifin	0	0	0	0	0	0
PF3D7_0600200	VAR	erythrocyte membrane protein 1, PfEMP1	10	3	4	223	64	71
PF3D7_0600300	RIF	rifin	2	0	0	0	32	2
PF3D7_0600400	VAR	erythrocyte membrane protein 1, PfEMP1	0	0	0	15	10	10
PF3D7_0600500	RIF	rifin	0	0	0	0	1	1
PF3D7_0600600	VAR	erythrocyte membrane protein 1 (PfEMP1), exon 2	0	0	0	0	0	0
PF3D7_0600700	RIF	rifin	0	0	0	0	0	0
PF3D7_0601000	EPF4	exported protein family 4	0	0	0	0	0	0
PF3D7_0601100	EPF3	exported protein family 3	0	0	0	0	0	0
PF3D7_0601200	MC-2TM	Pfmc-2TM Maurer's cleft two transmembrane protein	0	0	0	0	2	1
PF3D7_0601300	EPF1	exported protein family 1	0	0	0	0	0	0
PF3D7_0601500		Plasmodium exported protein (PHISTb), unknown function	0	0	0	0	0	0
PF3D7_0601600		tetratricopeptide repeat protein, putative	0	0	0	1	1	1
PF3D7_0601900		conserved Plasmodium protein, unknown function	1064	374	270	951	1165	827
PF3D7_0602000		zinc finger protein, putative	11	1	0	0	1	1
PF3D7_0602100	MTR4	ATP-dependent RNA helicase MTR4	203	27	7	154	39	113
PF3D7_0602200		MYND-type zinc finger protein, putative	156	47	36	76	100	64
PF3D7_0602300	PALM	liver merozoite formation protein, putative	0	0	0	0	0	0
PF3D7_0602400	EF-G	elongation factor G	102	64	12	52	66	62
PF3D7_0602500		geranylgeranyl transferase type-2 subunit beta, putative	15	9	6	8	10	14
PF3D7_0602600		SAC3 domain-containing protein, putative	76	9	3	53	18	43
PF3D7_0602700		conserved Plasmodium protein, unknown function	1	0	0	2	0	3
PF3D7_0602800	JmjC2	JmjC domain-containing protein 2, putative	4	0	2	3	2	2
PF3D7_0602900		conserved Plasmodium protein, unknown function	37	5	2	49	11	23
PF3D7_0603000		SDE2 domain-containing protein, putative	22	1	2	10	10	3
PF3D7_0603100		RNA-binding protein, putative	0	0	0	0	0	0
PF3D7_0603200	BCS1	mitochondrial chaperone BCS1, putative	0	0	0	0	0	1
PF3D7_0603300	DHODH	dihydroorotate dehydrogenase	113	46	16	43	49	48
PF3D7_0603400	TEX1	trophozoite exported protein 1	163	14	4	89	34	44
PF3D7_0603500	CAX	cation/H+ antiporter	0	1	0	2	0	1
PF3D7_0603600		AT-rich interactive domain-containing protein, putative	1	0	0	0	0	2
PF3D7_0603700	mFRS	phenylalanine--tRNA ligase	0	0	0	0	0	0
PF3D7_0603800	CEP76	NdP2 protein, putative	0	0	1	2	2	2
PF3D7_0603900		conserved Plasmodium protein, unknown function	0	0	0	0	0	0
PF3D7_0604000		conserved Plasmodium protein, unknown function	0	0	0	0	1	0
PF3D7_0604100	SIP2	AP2 domain transcription factor	4	1	0	2	0	0
PF3D7_0604200		ribosomal protein L41, mitochondrial, putative	0	0	0	0	1	1
PF3D7_0604300		conserved Plasmodium protein, unknown function	20	10	0	34	12	22
PF3D7_0604400		conserved protein, unknown function	0	0	0	1	0	0
PF3D7_0604500		GYF domain-containing protein, putative	524	26	5	444	30	83
PF3D7_0604600		DNA helicase, putative	4	0	0	2	0	0
PF3D7_0604700	GILP	glyoxalase I-like protein GILP	5	8	2	2	1	2
PF3D7_0604800		RAP protein, putative	4	0	0	1	3	0
PF3D7_0604900		conserved Plasmodium protein, unknown function	0	1	0	0	0	0
PF3D7_0605000		50S ribosomal protein L24, putative	0	0	0	0	0	0
PF3D7_0605100	KH1	KH domain-containing protein, putative	422	95	49	194	135	149
PF3D7_0605200		acylphosphatase, putative	0	0	0	0	0	0
PF3D7_0605300	ARK1	serine/threonine protein kinase ARK1	2	0	0	0	2	2
PF3D7_0605400		calcium-binding protein, putative	0	0	0	0	0	0
PF3D7_0605500		cyclin dependent kinase binding protein, putative	0	0	0	0	0	0
PF3D7_0605600		nucleoside diphosphate kinase, putative	0	0	0	0	0	0
PF3D7_0605700		conserved Plasmodium protein, unknown function	0	0	0	0	0	0
PF3D7_0605800	RAD50	DNA repair protein RAD50, putative	15	4	0	9	2	7
PF3D7_0605900		elongation of fatty acids protein, putative	53	16	30	43	7	27
PF3D7_0606000	KIC1	protein KIC1	455	65	41	424	104	187
PF3D7_0606100		RNA-binding protein, putative	315	57	19	258	81	213
PF3D7_0606200	PEX4	ubiquitin-conjugating enzyme E2 PEX4, putative	57	19	14	66	31	51
PF3D7_0606300		conserved Plasmodium protein, unknown function	0	0	0	0	0	0
PF3D7_0606400		conserved Plasmodium protein, unknown function	0	0	0	0	0	0
PF3D7_0606500	PTB	polypyrimidine tract-binding protein, putative	143	18	18	111	37	105
PF3D7_0606600		conserved Plasmodium protein, unknown function	705	47	10	570	62	132
PF3D7_0606700		coatomer alpha subunit, putative	708	142	91	478	208	370
PF3D7_0606800	VFT1	VFT protein	6	0	1	0	0	4
PF3D7_0606900	GLP2	glutaredoxin-like protein	9	8	2	5	5	6
PF3D7_0607000		translation initiation factor IF-2, putative	1562	86	37	1105	184	332
PF3D7_0607100		MYND-type zinc finger protein, putative	2	0	0	0	0	0
PF3D7_0607200		RING zinc finger protein, putative	0	0	0	0	0	0
PF3D7_0607300	UROD	uroporphyrinogen III decarboxylase	1	0	0	0	0	0
PF3D7_0607400		G-protein associated signal transduction protein, putative	28	14	11	27	15	19
PF3D7_0607500	COQ2	4-hydroxybenzoate polyprenyltransferase, putative	7	1	2	6	1	6
PF3D7_0607600	SAS6	spindle assembly abnormal protein 6, putative	0	1	0	0	0	2
PF3D7_0607700		conserved Plasmodium protein, unknown function	1	0	0	0	0	0
PF3D7_0607800		GTP-binding protein, putative	1	2	0	0	0	1
PF3D7_0607900		conserved Plasmodium protein, unknown function	0	2	0	0	3	0
PF3D7_0608000	DPH7	diphthine methyltransferase, putative	78	51	21	59	60	77
PF3D7_0608100		conserved Plasmodium protein, unknown function	64	5	1	44	15	13
PF3D7_0608200		conserved Plasmodium protein, unknown function	0	2	0	0	2	0
PF3D7_0608300		heptatricopeptide repeat-containing protein, putative	1	0	0	1	0	0
PF3D7_0608310	SAM50	sorting assembly machinery 50 kDa subunit, putative	6	0	0	2	3	0
PF3D7_0608400	C4AP4	respiratory chain complex 4 associated protein 4	1	1	0	0	0	0
PF3D7_0608500		proteasome subunit alpha type-2, putative	156	135	36	99	76	170
PF3D7_0608600		conserved Plasmodium protein, unknown function	2	0	0	1	0	1
PF3D7_0608700	CCT6	T-complex protein 1 subunit zeta	935	536	261	498	474	605
PF3D7_0608800	OAT	ornithine aminotransferase	2334	5930	882	951	2258	1788
PF3D7_0608900		conserved Plasmodium protein, unknown function	8	5	0	0	5	3
PF3D7_0609000	NUP637	nucleoporin NUP637, putative	995	71	23	672	122	181
PF3D7_0609100	ZIP1	zinc transporter ZIP1, putative	162	102	34	140	70	235
PF3D7_0609200		citrate synthase-like protein, putative	22	8	2	10	15	15
PF3D7_0609300		conserved Plasmodium protein, unknown function	0	2	0	0	0	0
PF3D7_0609400	CLS	mitochondrial cardiolipin synthase, putative	9	4	0	6	4	4
PF3D7_0609500		conserved Plasmodium protein, unknown function	1	0	0	0	0	0
PF3D7_0609600		conserved Plasmodium protein, unknown function	0	0	0	0	0	0
PF3D7_0609700	KIC6	protein KIC6	723	74	38	613	114	252
PF3D7_0609800	DHHC2	palmitoyltransferase DHHC2, putative	1	1	0	5	2	4
PF3D7_0609900		conserved Plasmodium protein, unknown function	97	7	6	77	19	17
PF3D7_0610000		ribosomal protein L19, mitochondrial, putative	0	0	0	0	0	0
PF3D7_0610100	SLU7	pre-mRNA-splicing factor SLU7, putative	330	36	26	229	127	152
PF3D7_0610200	RBM25	RNA-binding protein 25, putative	93	7	1	63	15	18
PF3D7_0610400	H3	histone H3	74	242	200	49	96	106
PF3D7_0610500		peptidyl-tRNA hydrolase PTRHD1, putative	90	21	13	44	34	33
PF3D7_0610600	CDPK2	calcium-dependent protein kinase 2	6	8	1	5	16	8
PF3D7_0610700		conserved Plasmodium protein, unknown function	8	0	4	3	4	2
PF3D7_0610800	TK	transketolase	1287	367	270	811	449	683
PF3D7_0610900	SPT5	transcription elongation factor SPT5, putative	324	37	22	190	118	153
PF3D7_0611000		SNARE associated Golgi protein, putative	0	0	0	0	0	0
PF3D7_0611100	SDH3	succinate dehydrogenase subunit 3, putative	0	0	0	0	0	0
PF3D7_0611200	AP2-EXP2	AP2 domain transcription factor AP2-EXP2	2	4	0	0	4	0
PF3D7_0611300	ATPTG2	ATP synthase-associated protein, putative	0	5	1	0	1	3
PF3D7_0611400	SWIB	SWI/SNF-related matrix-associated actin-dependent regulator of chromatin	11	3	1	3	6	6
PF3D7_0611500		conserved protein, unknown function	2	0	0	0	0	1
PF3D7_0611600	BTP1	basal complex transmembrane protein 1	2	0	0	2	0	0
PF3D7_0611700	RPL39	60S ribosomal protein L39	832	525	373	500	460	855
PF3D7_0611800		conserved Plasmodium protein, unknown function	101	18	1	55	14	27
PF3D7_0611900		lsm12, putative	6	15	2	4	5	3
PF3D7_0612000		conserved Plasmodium protein, unknown function	0	1	0	0	0	1
PF3D7_0612100	EIF3L	eukaryotic translation initiation factor 3 subunit L, putative	134	30	16	80	41	89
PF3D7_0612200	LRR6	leucine-rich repeat protein	0	1	0	1	0	1
PF3D7_0612300	TMEM234	transmembrane protein 234, putative	0	0	0	0	0	0
PF3D7_0612400		conserved Plasmodium protein, unknown function	0	0	0	0	0	0
PF3D7_0612500		conserved Plasmodium protein, unknown function	0	0	0	1	0	1
PF3D7_0612600	NCS6	cytoplasmic tRNA 2-thiolation protein 1, putative	32	18	2	23	6	19
PF3D7_0612700	P12	6-cysteine protein P12	1	0	0	0	0	0
PF3D7_0612800	P12p	6-cysteine protein P12p	13	7	7	9	8	24
PF3D7_0612900	NOG1	nucleolar GTP-binding protein 1, putative	1082	104	91	795	334	292
PF3D7_0613000		conserved Plasmodium protein, unknown function	1	0	0	0	0	1
PF3D7_0613100		conserved Plasmodium protein, unknown function	11	2	1	2	1	12
PF3D7_0613200		conserved Plasmodium protein, unknown function	0	1	0	0	1	2
PF3D7_0613300	ROP14	rhoptry protein ROP14	2	0	0	0	0	0
PF3D7_0613400	RPL18	50S ribosomal protein L18, apicoplast, putative	2	15	1	1	2	2
PF3D7_0613500		AP-3 complex subunit beta, putative	29	16	1	8	16	5
PF3D7_0613600		conserved Plasmodium protein, unknown function	0	0	0	0	0	1
PF3D7_0613700		syntaxin-binding protein, putative	38	24	14	17	24	25
PF3D7_0613800	ApiAP2	AP2 domain transcription factor, putative	7	1	0	2	0	0
PF3D7_0613900	MyoE	myosin E, putative	7	3	2	3	0	2
PF3D7_0614000		thiamine-phosphate synthase, putative	3	2	0	2	3	2
PF3D7_0614100		filamin domain-containing protein, putative	7	0	0	0	0	0
PF3D7_0614200	NAR1	cytosolic Fe-S cluster assembly factor NAR1, putative	19	3	3	18	10	8
PF3D7_0614300	MFR1	major facilitator superfamily-related transporter, putative	874	176	81	597	243	552
PF3D7_0614400	CWF7	pre-mRNA-splicing factor CWF7, putative	137	34	19	113	56	131
PF3D7_0614500	RPL19	60S ribosomal protein L19	2436	726	362	1484	1202	1401
PF3D7_0614600		conserved Plasmodium protein, unknown function	0	0	0	0	0	0
PF3D7_0614700		F-box protein FBXO6, putative	0	0	0	0	0	0
PF3D7_0614800	NTHL1	endonuclease III-like protein 1, putative	9	2	0	4	6	5
PF3D7_0614900		conserved Plasmodium membrane protein, unknown function	1	1	0	0	0	0
PF3D7_0615000		conserved Plasmodium protein, unknown function	15	6	4	15	11	47
PF3D7_0615100	ENR	enoyl-acyl carrier reductase	0	0	0	0	0	0
PF3D7_0615200		conserved protein, unknown function	0	0	0	0	0	0
PF3D7_0615300	GWT1	GPI-anchored wall transfer protein 1, putative	2	0	0	1	1	0
PF3D7_0615400		ribonuclease, putative	234	15	9	248	17	66
PF3D7_0615500	CRK5	cdc2-related protein kinase 5	3	1	0	1	0	2
PF3D7_0615600		zinc finger protein, putative	190	25	7	147	37	100
PF3D7_0615700	ALYREF	THO complex subunit 4, putative	36	12	23	29	20	54
PF3D7_0615800	COG4	conserved oligomeric Golgi complex subunit 4, putative	6	3	1	1	0	2
PF3D7_0615900		protein phosphatase, putative	67	21	2	29	37	18
PF3D7_0616000	PDXK	pyridoxal kinase	85	47	10	26	59	26
PF3D7_0616100		conserved Plasmodium protein, unknown function	13	11	1	17	13	18
PF3D7_0616200	NDC80	kinetochore protein NDC80, putative	1	3	0	1	0	0
PF3D7_0616300		conserved Plasmodium protein, unknown function	7	1	0	9	5	6
PF3D7_0616400		conserved Plasmodium protein, unknown function	21	1	1	5	4	2
PF3D7_0616500	TLP	TRAP-like protein	5	0	0	0	0	0
PF3D7_0616600		conserved protein, unknown function	0	0	0	0	0	0
PF3D7_0616700		ras GTPAse, putative	4	1	0	1	1	1
PF3D7_0616800	MQO	malate:quinone oxidoreductase	55	50	13	24	41	51
PF3D7_0616900		conserved Plasmodium protein, unknown function	17	1	0	6	3	9
PF3D7_0617000	TOM40	mitochondrial import receptor subunit TOM40, putative	172	166	68	119	91	176
PF3D7_0617100		AP-2 complex subunit alpha, putative	151	31	10	94	19	105
PF3D7_0617200		BFR1 domain-containing protein, putative	739	99	29	538	254	405
PF3D7_0617300		RNA-binding protein, putative	2	0	0	1	0	0
PF3D7_0617400	VAR	erythrocyte membrane protein 1, PfEMP1	12	3	5	7438	2193	2742
PF3D7_0617600		stevor	0	1	1	1	13	2
PF3D7_0617700	RIF	rifin	0	0	0	0	0	1
PF3D7_0617800	H2A	histone H2A	919	763	599	634	526	558
PF3D7_0617900	H3.3	histone H3 variant	1583	744	617	975	736	1042
PF3D7_0618000		conserved Plasmodium membrane protein, unknown function	3	0	0	0	0	4
PF3D7_0618100		conserved Plasmodium protein, unknown function	0	1	0	0	1	0
PF3D7_0618200		conserved protein, unknown function	192	98	33	123	99	244
PF3D7_0618300		60S ribosomal protein L27a, putative	4121	1427	1277	2147	2200	1541
PF3D7_0618400		LMBR1 domain-containing protein, putative	0	0	0	0	0	0
PF3D7_0618500	MDH	malate dehydrogenase	1	0	2	1	0	2
PF3D7_0618600	ROM10	rhomboid protease ROM10	0	0	0	0	0	2
PF3D7_0618700		trafficking protein particle complex subunit 6A, putative	15	1	0	3	2	8
PF3D7_0618800		heptatricopeptide repeat-containing protein, putative	0	0	0	0	0	0
PF3D7_0618900	GPI1	phosphatidylinositol N-acetylglucosaminyltransferase subunit GPI1	0	0	0	0	0	0
PF3D7_0619000		FPL domain-containing protein, putative	352	48	11	281	60	107
PF3D7_0619100		conserved Plasmodium protein, unknown function	17	10	4	7	17	17
PF3D7_0619200		conserved Plasmodium protein, unknown function	147	12	3	129	21	37
PF3D7_0619300		conserved Plasmodium protein, unknown function	0	0	0	0	0	0
PF3D7_0619400		cell division cycle protein 48 homologue, putative	1041	744	323	654	475	740
PF3D7_0619500	ACS12	acyl-CoA synthetase	28	4	4	8	10	12
PF3D7_0619600		conserved Plasmodium protein, unknown function	0	0	0	0	0	0
PF3D7_0619700		F-box protein FBXO1, putative	3	0	0	2	0	0
PF3D7_0619800		conserved Plasmodium membrane protein, unknown function	32	1	3	26	10	17
PF3D7_0619900	SF3A2	splicing factor 3A subunit 2, putative	27	3	6	8	11	16
PF3D7_0620000	PIMMS43	PIMMS43 protein	0	0	0	0	0	0
PF3D7_0620100	ATPTG12	ATP synthase-associated protein, putative	0	0	0	0	0	0
PF3D7_0620200		conserved Plasmodium protein, unknown function	0	0	0	0	0	0
PF3D7_0620300		conserved Plasmodium protein, unknown function	0	0	1	0	0	0
PF3D7_0620400	MSP10	merozoite surface protein 10	0	1	0	0	0	0
PF3D7_0620500		cleavage stimulation factor subunit 1, putative	97	35	7	78	29	41
PF3D7_0620600		conserved Plasmodium protein, unknown function	4	0	0	1	1	0
PF3D7_0620700		DnaJ protein, putative	0	0	0	0	0	1
PF3D7_0621000		conserved Plasmodium protein, unknown function	10	0	0	4	5	0
PF3D7_0621100		conserved Plasmodium protein, unknown function	8	1	1	2	3	4
PF3D7_0621200	PDX1	pyridoxine biosynthesis protein PDX1	1824	959	340	1034	1342	1089
PF3D7_0621300	PUF3	mRNA-binding protein PUF3	88	2	5	55	12	26
PF3D7_0621350	SYS1	protein SYS1, putative	0	0	0	0	0	0
PF3D7_0621400	ALV7	Pf77 protein	44	0	2	7	0	8
PF3D7_0621500	RPP1	ribonuclease P/MRP protein subunit RPP1, putative	2	0	0	1	0	2
PF3D7_0621700		RAP protein, putative	12	0	0	7	2	7
PF3D7_0621800		nascent polypeptide-associated complex subunit alpha, putative	1401	680	334	1052	553	1122
PF3D7_0621900	SRP68	signal recognition particle subunit SRP68, putative	290	44	34	185	70	132
PF3D7_0622000		conserved Plasmodium protein, unknown function	6	3	2	2	1	4
PF3D7_0622100		conserved Plasmodium protein, unknown function	33	0	1	14	0	3
PF3D7_0622200	MIAB	tRNA-2-methylthio-N(6)-dimethylallyladenosine synthase	404	63	28	296	123	170
PF3D7_0622300		vacuolar transporter chaperone, putative	9	0	1	1	0	0
PF3D7_0622400		conserved protein, unknown function	0	0	0	0	0	0
PF3D7_0622500		RNA methyltransferase, putative	8	1	1	3	1	2
PF3D7_0622600	QCR9	cytochrome b-c1 complex subunit 9, putative	0	1	0	0	0	1
PF3D7_0622700		conserved Plasmodium membrane protein, unknown function	1	0	0	5	3	1
PF3D7_0622800		leucine--tRNA ligase, putative	628	83	44	460	151	479
PF3D7_0622900	AP2Tel	AP2 domain transcription factor AP2Tel	390	24	8	322	45	88
PF3D7_0623000	CS	chorismate synthase	93	51	15	46	35	56
PF3D7_0623100	NAB2	nuclear polyadenylated RNA-binding protein NAB2, putative	1348	152	86	1137	290	424
PF3D7_0623200	FNR	ferredoxin--NADP reductase	53	8	3	32	14	17
PF3D7_0623300		EGF-like membrane protein, putative	0	2	0	0	3	1
PF3D7_0623400	Mei2	MEI2-like RNA-binding protein	0	0	0	0	0	0
PF3D7_0623500	SOD2	superoxide dismutase [Fe]	35	16	8	31	23	70
PF3D7_0623600		splicing factor-like protein 1, putative	445	79	52	287	134	167
PF3D7_0623700	SUV3	ATP-dependent RNA helicase SUV3, putative	6	1	0	1	1	4
PF3D7_0623800	TKL4	tyrosine kinase-like protein, putative	2391	106	65	1932	271	490
PF3D7_0623900		ribonuclease H2 subunit A, putative	31	5	2	8	5	7
PF3D7_0624000	HK	hexokinase	1386	886	406	842	638	1239
PF3D7_0624100		conserved protein, unknown function	2	0	0	2	0	1
PF3D7_0624200		SURP domain-containing protein, putative	6	4	0	2	7	3
PF3D7_0624300		CPW-WPC family protein	1	2	0	0	0	1
PF3D7_0624400		conserved protein, unknown function	86	16	7	47	41	32
PF3D7_0624500	APC11	anaphase-promoting complex subunit 11, putative	1	2	0	3	5	2
PF3D7_0624600	ISWI	ISWI chromatin-remodeling complex ATPase	1568	158	43	1282	155	500
PF3D7_0624700	PIGL	N-acetylglucosaminyl-phosphatidylinositol de-N-acetylase, putative	0	0	0	0	0	0
PF3D7_0624800		conserved Plasmodium protein, unknown function	0	0	0	0	0	0
PF3D7_0624900		GAS8-like protein, putative	0	0	0	0	0	0
PF3D7_0625000	SMS1	sphingomyelin synthase 1, putative	0	0	0	0	0	0
PF3D7_0625100	SMS2	sphingomyelin synthase 2, putative	0	0	0	0	0	0
PF3D7_0625200		conserved Plasmodium protein, unknown function	0	0	0	0	0	0
PF3D7_0625300	MtDNAP	mitochondrial DNA polymerase	1	1	0	2	0	0
PF3D7_0625400		conserved Plasmodium protein, unknown function	75	12	7	43	30	74
PF3D7_0625500		conserved Plasmodium membrane protein, unknown function	8	3	0	3	1	3
PF3D7_0625600	PAP	poly(A) polymerase PAP, putative	274	105	51	214	119	403
PF3D7_0625700		conserved protein, unknown function	0	0	0	1	1	1
PF3D7_0625800		conserved Plasmodium protein, unknown function	11	2	3	4	4	7
PF3D7_0625900		conserved Plasmodium protein, unknown function	0	0	0	0	0	0
PF3D7_0626000		conserved Plasmodium protein, unknown function	75	2	3	51	16	15
PF3D7_0626100		oxidoreductase, short-chain dehydrogenase family, putative	18	8	3	3	10	14
PF3D7_0626200		conserved Plasmodium protein, unknown function	7	1	1	2	5	0
PF3D7_0626300	FabB/FabF	3-oxoacyl-acyl-carrier protein synthase I/II	0	0	0	0	0	0
PF3D7_0626400		CRAL/TRIO domain-containing protein, putative	0	1	0	0	0	0
PF3D7_0626500	CEP135	centrosomal protein CEP135, putative	0	0	0	0	0	0
PF3D7_0626600		conserved Plasmodium protein, unknown function	8	0	3	2	0	3
PF3D7_0626700		ATPase	69	42	21	61	27	174
PF3D7_0626800	PyrK	pyruvate kinase	4691	1625	1082	3601	2423	3923
PF3D7_0626900		ribosomal protein L46, mitochondrial, putative	9	1	0	2	0	1
PF3D7_0627000		conserved Plasmodium protein, unknown function	1	0	0	0	0	0
PF3D7_0627100		ankyrin-repeat protein, putative	646	105	50	532	117	425
PF3D7_0627200		myosin light chain, putative	0	0	0	0	0	0
PF3D7_0627300	RNF5	E3 ubiquitin-protein ligase RNF5, putative	346	114	51	259	133	287
PF3D7_0627400	TIM22	mitochondrial import inner membrane translocase subunit TIM22, putative	7	4	0	0	1	2
PF3D7_0627500	DJ1	protein DJ-1	688	465	255	911	574	1026
PF3D7_0627600		conserved Plasmodium protein, unknown function	2	0	0	2	1	1
PF3D7_0627700		transportin	556	147	60	306	109	260
PF3D7_0627800	ACAS	acetyl-CoA synthetase	553	260	145	380	222	319
PF3D7_0627900	POP4	ribonuclease P protein subunit p29, putative	28	9	5	21	13	19
PF3D7_0628000	PTPS	6-pyruvoyltetrahydropterin synthase	4	2	0	1	0	3
PF3D7_0628100	HECT1	HECT domain-containing protein 1, putative	10	2	0	6	1	5
PF3D7_0628200	PK4	eukaryotic translation initiation factor 2-alpha kinase	985	109	32	738	157	306
PF3D7_0628300	CEPT	choline/ethanolaminephosphotransferase, putative	162	84	95	178	41	182
PF3D7_0628400		protease, putative	1	1	0	1	0	1
PF3D7_0628500		conserved Plasmodium protein, unknown function	2	0	0	0	0	1
PF3D7_0628600		DNA methyltransferase 1-associated protein 1, putative	53	20	15	37	19	68
PF3D7_0628700		conserved Plasmodium protein, unknown function	13	2	1	1	2	2
PF3D7_0628800	GATB	glutamyl-tRNA(Gln) amidotransferase subunit B	1	1	0	0	0	0
PF3D7_0628900		RAP protein, putative	1	2	0	0	1	0
PF3D7_0629000	GNA1	glucosamine 6-phosphate N-acetyltransferase	0	0	0	0	0	0
PF3D7_0629100	NAPRT	nicotinate phosphoribosyltransferase, putative	41	17	4	32	12	19
PF3D7_0629200		DnaJ protein, putative	68	15	7	44	22	76
PF3D7_0629300	PL	phospholipase, putative	11	0	1	1	0	0
PF3D7_0629400	PABP3	polyadenylate-binding protein 3, putative	3	6	0	2	0	3
PF3D7_0629500	AAT1	amino acid transporter AAT1	143	51	21	72	34	109
PF3D7_0629600		ribosomal RNA-processing protein 7, putative	29	12	9	21	17	13
PF3D7_0629700	SET1	SET domain protein, putative	428	36	16	426	23	119
PF3D7_0629800		cullin-2, putative	51	5	4	41	13	53
PF3D7_0629900		CRAL/TRIO domain-containing protein, putative	380	162	94	244	88	162
PF3D7_0630000		CPW-WPC family protein	0	0	0	0	0	0
PF3D7_0630100		alpha/beta hydrolase, putative	9	2	1	3	6	7
PF3D7_0630200	PSOP6	secreted ookinete protein, putative	0	0	0	0	0	0
PF3D7_0630300		DNA polymerase epsilon catalytic subunit A, putative	0	2	0	0	0	0
PF3D7_0630400		conserved Plasmodium protein, unknown function	0	0	0	0	0	0
PF3D7_0630500	YTM1	ribosome biogenesis protein YTM1, putative	10	2	0	7	5	0
PF3D7_0630600		deubiquitinating enzyme MINDY, putative	58	29	9	34	24	72
PF3D7_0630700		bifunctional methylenetetrahydrofolate dehydrogenase/cyclohydrolase, putative	4	0	0	2	5	1
PF3D7_0630800		TPH domain-containing protein, putative	0	0	0	0	0	0
PF3D7_0630900	HAS1	ATP-dependent RNA helicase HAS1	72	8	10	43	16	34
PF3D7_0631000		tetratricopeptide repeat protein, putative	1	0	0	0	0	0
PF3D7_0631100		Plasmodium exported protein (PHISTb), unknown function	1	0	0	0	0	0
PF3D7_0631300	EPF1	exported protein family 1	0	0	0	0	0	0
PF3D7_0631400	MC-2TM	Pfmc-2TM Maurer's cleft two transmembrane protein	0	0	0	0	0	0
PF3D7_0631500	EPF3	exported protein family 3	2	1	0	2	1	0
PF3D7_0631600	EPF4	exported protein family 4	0	0	0	0	0	0
PF3D7_0631800	RIF	rifin	0	0	0	0	0	0
PF3D7_0631900		stevor	0	0	0	0	0	0
PF3D7_0632000	RIF	rifin	0	0	0	0	1	1
PF3D7_0632100	RIF	rifin	0	0	0	0	0	0
PF3D7_0632200	RIF	rifin	0	0	0	0	0	0
PF3D7_0632300	RIF	rifin	0	0	0	0	0	0
PF3D7_0632400	RIF	rifin	0	0	0	3	11	0
PF3D7_0632500	VAR	erythrocyte membrane protein 1, PfEMP1	96	20	25	9775	1978	3971
PF3D7_0632700	RIF	rifin	0	1	0	4	40	2
PF3D7_0632800	VAR	erythrocyte membrane protein 1, PfEMP1	16	3	3	1760	596	694
PF3D7_0700100	VAR	erythrocyte membrane protein 1, PfEMP1	6	0	3	22	12	11
PF3D7_0700200	RIF	rifin	0	0	0	0	12	1
PF3D7_0700300	RIF	rifin	0	0	0	0	0	0
PF3D7_0700400		stevor	0	0	0	0	0	0
PF3D7_0700500	RIF	rifin	0	0	0	0	1	0
PF3D7_0700800	MC-2TM	Pfmc-2TM Maurer's cleft two transmembrane protein	0	0	0	0	2	0
PF3D7_0701100	RIF	rifin	0	0	0	0	4	1
PF3D7_0701500	EPF3	exported protein family 3	0	0	0	0	0	0
PF3D7_0701600	MC-2TM	Pfmc-2TM Maurer's cleft two transmembrane protein	0	0	0	0	1	0
PF3D7_0701700	EPF1	exported protein family 1	0	0	0	0	0	0
PF3D7_0701800	RIF	rifin	0	0	0	0	0	0
PF3D7_0701900		Plasmodium exported protein, unknown function	52	5	4	111	8	33
PF3D7_0702000		Plasmodium exported protein (hyp12), unknown function	28	3	1	36	8	29
PF3D7_0702200	LPL20	lysophospholipase LPL20	69	17	18	70	35	187
PF3D7_0702300	STARP	sporozoite threonine and asparagine-rich protein	80	4	0	86	13	46
PF3D7_0702400	SEMP1	small exported membrane protein 1	5624	1346	1621	3270	4338	2594
PF3D7_0702500		Plasmodium exported protein, unknown function	7238	3438	2526	4739	5428	4344
PF3D7_0702600		chitinase, fragment	4	0	0	0	1	2
PF3D7_0702900		centrin, putative	58	23	11	38	25	50
PF3D7_0703000		conserved Plasmodium protein, unknown function	11	0	1	6	3	2
PF3D7_0703100	CIA2	cytosolic iron-sulfur assembly component 2, putative	5	1	2	2	2	2
PF3D7_0703200		conserved Plasmodium protein, unknown function	19	3	0	3	2	2
PF3D7_0703300		conserved Plasmodium protein, unknown function	16	9	1	7	8	12
PF3D7_0703400		conserved Plasmodium protein, unknown function	29	0	1	6	1	5
PF3D7_0703500		erythrocyte membrane-associated antigen	2657	266	103	1670	397	672
PF3D7_0703600		conserved protein, unknown function	1	3	0	0	1	2
PF3D7_0703700		conserved protein, unknown function	365	100	89	206	219	114
PF3D7_0703800		conserved Plasmodium protein, unknown function	12	0	0	8	0	3
PF3D7_0703900		conserved Plasmodium membrane protein, unknown function	201	11	1	132	15	34
PF3D7_0704000		conserved Plasmodium membrane protein, unknown function	58	5	0	62	8	19
PF3D7_0704100	BTP2	basal complex transmembrane protein 2	12	2	0	2	0	2
PF3D7_0704200	NSUN1	RNA cytosine C(5)-methyltransferase, putative	102	16	10	74	19	50
PF3D7_0704300		conserved Plasmodium membrane protein, unknown function	2	0	0	1	0	4
PF3D7_0704400		phosphoinositide-binding protein, putative	10	10	1	9	10	8
PF3D7_0704500		serine/threonine protein kinase, putative	4	1	0	1	0	1
PF3D7_0704600	UT	HECT-type E3 ubiquitin ligase UT	1342	88	30	1253	126	352
PF3D7_0704700	PPAT	phosphopantetheine adenylyltransferase, putative	11	1	0	6	2	1
PF3D7_0704800	PPM12	protein phosphatase PPM12, putative	4	0	0	1	1	2
PF3D7_0704900	RF2	peptide chain release factor 2	0	2	0	1	1	2
PF3D7_0705000		mRNA cap guanine-N7 methyltransferase, putative	72	10	0	50	8	33
PF3D7_0705100		conserved Plasmodium protein, unknown function	0	1	0	3	0	0
PF3D7_0705200		conserved Plasmodium protein, unknown function	1	0	0	0	0	0
PF3D7_0705300	ORC2	origin recognition complex subunit 2	0	0	0	1	0	0
PF3D7_0705400	MCM7	DNA replication licensing factor MCM7	3	10	2	1	3	1
PF3D7_0705500		inositol-phosphate phosphatase, putative	1446	141	60	1083	203	371
PF3D7_0705600		RNA helicase, putative	66	4	2	12	2	10
PF3D7_0705700		40S ribosomal protein S29, putative	1016	467	230	650	528	991
PF3D7_0705800	CRISP	cysteine-rich secretory protein	3	0	0	0	1	0
PF3D7_0705900		ATP synthase subunit C, putative	68	25	9	30	32	32
PF3D7_0706000		importin-7, putative	204	11	4	131	30	38
PF3D7_0706100		conserved Plasmodium protein, unknown function	4	4	2	4	1	8
PF3D7_0706200		conserved protein, unknown function	0	0	0	0	0	0
PF3D7_0706300		conserved Plasmodium protein, unknown function	0	0	0	0	0	0
PF3D7_0706400	RPL37	60S ribosomal protein L37	1136	606	219	761	565	1041
PF3D7_0706500		conserved Plasmodium protein, unknown function	570	42	11	482	64	144
PF3D7_0706600		conserved Plasmodium protein, unknown function	0	0	0	0	0	0
PF3D7_0706700	MSH2-2	DNA mismatch repair protein MSH2, putative	0	0	0	0	0	0
PF3D7_0707200		conserved Plasmodium protein, unknown function	1	0	0	0	0	0
PF3D7_0707300	RAMA	rhoptry-associated membrane antigen	4	2	2	5	4	5
PF3D7_0707400		AAA family ATPase, putative	77	48	7	46	26	50
PF3D7_0707500		conserved Plasmodium protein, unknown function	14	1	1	7	3	0
PF3D7_0707600	MED10	mediator of RNA polymerase II transcription subunit 10, putative	2	4	1	8	3	10
PF3D7_0707700		E3 ubiquitin-protein ligase, putative	367	67	28	275	128	187
PF3D7_0707800		RAP protein, putative	8	5	1	3	4	5
PF3D7_0707900		ribosomal protein S8e, putative	61	46	15	33	24	109
PF3D7_0708000		cytoskeleton associated protein, putative	42	3	1	10	9	11
PF3D7_0708100	RPB10	DNA-directed RNA polymerases I, II, and III subunit RPABC5, putative	23	18	6	12	10	56
PF3D7_0708200		conserved Plasmodium protein, unknown function	2	0	0	1	0	1
PF3D7_0708300	BUD32	EKC/KEOPS complex subunit BUD32	22	15	6	15	19	41
PF3D7_0708400	HSP90	heat shock protein 90	6152	1889	682	3690	2470	3529
PF3D7_0708500		heat shock protein 86 family protein	166	21	5	161	41	91
PF3D7_0708600	IMC1d	inner membrane complex protein 1d, putative	0	0	0	0	0	0
PF3D7_0708700	COX4	cytochrome c oxidase subunit 4, putative	43	7	6	20	8	24
PF3D7_0708800	HSP110c	heat shock protein 110	1251	175	54	1167	308	658
PF3D7_0708900	SCO1	protein SCO1, putative	26	0	1	11	3	8
PF3D7_0709000	CRT	chloroquine resistance transporter	656	300	192	501	267	561
PF3D7_0709100		Cg1 protein	5	3	2	3	1	9
PF3D7_0709200	GLP3	glutaredoxin-like protein	29	2	3	12	7	7
PF3D7_0709300	MED14	mediator of RNA polymerase II transcription subunit 14, putative	279	36	15	205	64	100
PF3D7_0709400		Cg7 protein	1	2	0	1	0	1
PF3D7_0709500		nucleic acid-binding protein, putative	0	0	0	0	1	1
PF3D7_0709600	POP1	ribonucleases P/MRP protein subunit POP1, putative	76	15	2	47	12	47
PF3D7_0709700	PARE	prodrug activation and resistance esterase	127	51	33	107	53	79
PF3D7_0709800		conserved protein, unknown function	0	0	1	0	0	0
PF3D7_0709900		hydrolase, putative	0	2	0	0	0	0
PF3D7_0710000		conserved Plasmodium protein, unknown function	25	1	1	13	7	3
PF3D7_0710100		conserved protein, unknown function	18	1	2	11	2	10
PF3D7_0710200		conserved Plasmodium protein, unknown function	21	1	0	10	1	1
PF3D7_0710300		conserved protein, unknown function	36	38	15	22	33	54
PF3D7_0710400	RAD14	DNA repair protein RAD14, putative	10	1	1	5	4	2
PF3D7_0710500		conserved protein, unknown function	1	0	0	0	1	0
PF3D7_0710600	RPL34	60S ribosomal protein L34	3616	1591	1097	2345	2260	2211
PF3D7_0710700		conserved Plasmodium protein, unknown function	88	8	4	38	17	48
PF3D7_0710800	USE1	protein transport protein USE1, putative	8	2	1	3	6	11
PF3D7_0710900	RPL1	50S ribosomal protein L1, mitochondrial, putative	9	0	0	3	0	4
PF3D7_0711000	CDC48	AAA family ATPase, CDC48 subfamily	53	21	4	25	15	22
PF3D7_0711100		conserved protein, unknown function	22	8	6	9	7	3
PF3D7_0711200		conserved Plasmodium protein, unknown function	4	0	0	1	0	4
PF3D7_0711300		conserved Plasmodium protein, unknown function	23	8	1	4	6	13
PF3D7_0711400	SAP18	histone deacetylase complex subunit SAP18, putative	19	3	0	3	1	7
PF3D7_0711500		regulator of chromosome condensation, putative	279	105	35	150	100	176
PF3D7_0711700	VAR	erythrocyte membrane protein 1, PfEMP1	44	11	14	3207	1112	1308
PF3D7_0712000	VAR	erythrocyte membrane protein 1, PfEMP1	4	0	0	1091	423	501
PF3D7_0712300	VAR	erythrocyte membrane protein 1, PfEMP1	16	4	3	518	124	175
PF3D7_0712400	VAR	erythrocyte membrane protein 1, PfEMP1	10	4	0	2496	916	930
PF3D7_0712600	VAR	erythrocyte membrane protein 1, PfEMP1	6	1	3	585	193	229
PF3D7_0712800	VAR	erythrocyte membrane protein 1, PfEMP1	22	3	8	331	130	160
PF3D7_0712900	VAR	erythrocyte membrane protein 1, PfEMP1	6	0	2	272	75	101
PF3D7_0713000	RIF	rifin	0	0	0	0	0	0
PF3D7_0713100	MC-2TM	Pfmc-2TM Maurer's cleft two transmembrane protein	0	0	0	0	0	0
PF3D7_0713200	EPF1	exported protein family 1	0	0	0	4	0	4
PF3D7_0713400	SR25	GPCR-like receptor SR25	89	28	19	60	31	57
PF3D7_0713500		conserved Plasmodium protein, unknown function	19	3	0	6	2	0
PF3D7_0713600		ribosomal protein S5, mitochondrial, putative	20	0	0	3	2	2
PF3D7_0713700		conserved Plasmodium protein, unknown function	16	7	4	6	10	16
PF3D7_0713800	NELFA	negative elongation factor A, putative	0	1	0	0	0	1
PF3D7_0713900		conserved Plasmodium protein, unknown function	836	48	10	588	49	106
PF3D7_0714000	H2B.Z	histone H2B variant	840	337	222	488	318	616
PF3D7_0714100		MAATS1 domain-containing protein, putative	0	0	0	0	0	0
PF3D7_0714200		conserved Plasmodium protein, unknown function	141	24	5	113	38	63
PF3D7_0714300	DHHC4	palmitoyltransferase DHHC4, putative	73	13	4	74	23	52
PF3D7_0714400		calmodulin, putative	3	0	0	0	0	1
PF3D7_0714500		transcription elongation factor s-II, putative	45	4	3	14	4	21
PF3D7_0714600		conserved protein, unknown function	17	4	0	13	9	10
PF3D7_0715000	PNPase	4-nitrophenylphosphatase	35	8	14	16	12	20
PF3D7_0715100	MYCBP	C-Myc-binding protein, putative	0	0	0	0	0	0
PF3D7_0715200		conserved Plasmodium protein, unknown function	0	0	0	0	0	0
PF3D7_0715300		calcium/calmodulin-dependent protein kinase, putative	0	0	0	0	0	0
PF3D7_0715400	PSOP20	secreted ookinete protein, putative	0	0	0	0	0	0
PF3D7_0715500		ATP synthase subunit epsilon, mitochondrial, putative	0	0	0	0	0	0
PF3D7_0715600		GTP-binding translation elongation factor tu family protein, putative	2	8	0	1	1	1
PF3D7_0715700		conserved protein, unknown function	0	0	0	0	0	0
PF3D7_0715800	DMT1	drug/metabolite transporter DMT1, putative	1	6	0	0	3	2
PF3D7_0715900	CDF	cation diffusion facilitator family protein, putative	0	3	0	0	1	1
PF3D7_0716000		RNA-binding protein, putative	499	28	20	444	91	127
PF3D7_0716100	SDA1	protein SDA1, putative	139	17	5	107	19	76
PF3D7_0716200		PDCD2 domain-containing protein, putative	1602	379	330	644	306	673
PF3D7_0716300		conserved protein, unknown function	35	45	3	14	22	27
PF3D7_0716400		transcription initiation factor IIA subunit 1, putative	27	15	3	46	17	31
PF3D7_0716500		conserved Plasmodium protein, unknown function	0	0	0	0	0	0
PF3D7_0716600	SufS	cysteine desulfurase	2	1	0	0	0	1
PF3D7_0716700		conserved Plasmodium protein, unknown function	0	0	0	0	1	0
PF3D7_0716800	EIF3I	eukaryotic translation initiation factor 3 subunit I, putative	1090	231	153	696	392	649
PF3D7_0716900	DMT2	drug/metabolite transporter DMT2	14	3	4	12	11	1
PF3D7_0717000		conserved Plasmodium membrane protein, unknown function	2	0	0	0	0	0
PF3D7_0717100		CRAL/TRIO domain-containing protein, putative	31	12	4	14	11	16
PF3D7_0717200		conserved Plasmodium protein, unknown function	67	17	5	76	30	55
PF3D7_0717300		transcription initiation factor IIE subunit alpha, putative	110	70	20	87	58	99
PF3D7_0717400		queuine tRNA-ribosyltransferase, putative	243	47	17	161	73	184
PF3D7_0717500	CDPK4	calcium-dependent protein kinase 4	138	11	3	54	11	45
PF3D7_0717600	IMC32	inner membrane complex protein, putative	1	0	0	1	0	0
PF3D7_0717700		serine--tRNA ligase, putative	343	127	46	233	146	406
PF3D7_0717800		conserved Plasmodium protein, unknown function	7	2	0	0	2	0
PF3D7_0717900		thioredoxin-like protein	29	16	2	16	10	21
PF3D7_0718000		dynein heavy chain, putative	0	0	0	1	0	0
PF3D7_0718100	EST	exported serine/threonine protein kinase	0	0	0	0	1	0
PF3D7_0718300	CRMP2	cysteine repeat modular protein 2	1	0	0	0	0	0
PF3D7_0718400		ribosomal protein S8, mitochondrial, putative	54	62	16	19	68	26
PF3D7_0718500		prefoldin subunit 3, putative	92	54	24	43	72	87
PF3D7_0718600		conserved Plasmodium protein, unknown function	9	0	1	6	0	3
PF3D7_0718700		conserved Plasmodium membrane protein, unknown function	0	0	0	0	0	0
PF3D7_0718800		conserved protein, unknown function	0	0	0	0	0	0
PF3D7_0718900		conserved Plasmodium protein, unknown function	0	0	0	0	0	0
PF3D7_0719000		conserved protein, unknown function	4	4	1	2	3	3
PF3D7_0719100		ATP synthase F0 subunit a-like protein, putative	0	0	0	0	0	0
PF3D7_0719200	NEK4	NIMA related kinase 4	0	0	0	0	0	0
PF3D7_0719300	ARP6	actin-related protein ARP6	222	43	16	238	62	121
PF3D7_0719400		conserved Plasmodium protein, unknown function	7	2	0	5	1	3
PF3D7_0719500	CDC50A	LEM3/CDC50 family protein, putative	3	0	0	1	0	0
PF3D7_0719600		60S ribosomal protein L11a, putative	3604	1224	1016	2129	1698	1903
PF3D7_0719700	RPS10	40S ribosomal protein S10, putative	2796	494	500	1495	1180	1061
PF3D7_0719800		conserved protein, unknown function	34	2	1	26	4	10
PF3D7_0719900		conserved Plasmodium membrane protein, unknown function	507	38	11	344	75	137
PF3D7_0720000	CSL4	exosome complex component CSL4, putative	72	17	18	51	25	36
PF3D7_0720100	ESF2	pre-rRNA-processing protein ESF2, putative	32	6	2	14	8	45
PF3D7_0720200		conserved protein, unknown function	67	30	16	47	23	74
PF3D7_0720300		conserved Plasmodium protein, unknown function	0	0	0	0	0	0
PF3D7_0720400	AIF	apoptosis-inducing factor, putative	32	22	1	14	11	25
PF3D7_0720500		conserved Plasmodium protein, unknown function	3	0	0	0	2	0
PF3D7_0720600		conserved protein, unknown function	154	23	23	119	90	109
PF3D7_0720700	PX1	phosphoinositide-binding protein PX1	1027	56	39	934	159	327
PF3D7_0720800		Ham1-like protein, putative	28	9	5	6	13	6
PF3D7_0720900		tetratricopeptide repeat protein, putative	27	2	0	11	1	4
PF3D7_0721000		conserved Plasmodium membrane protein, unknown function	231	21	6	142	22	68
PF3D7_0721100		conserved protein, unknown function	12	5	1	1	6	5
PF3D7_0721200		conserved Plasmodium protein, unknown function	39	5	6	26	9	10
PF3D7_0721300	DDX31	ATP-dependent DNA helicase DDX31	232	43	16	138	57	131
PF3D7_0721400		rhoptry protein, putative	9	14	4	6	6	17
PF3D7_0721500		conserved Plasmodium membrane protein, unknown function	0	0	0	0	0	0
PF3D7_0721600		40S ribosomal protein S5, putative	3780	1694	957	2495	1832	2330
PF3D7_0721700	PSOP1	secreted ookinete protein, putative	13	0	3	3	1	6
PF3D7_0721800		conserved Plasmodium protein, unknown function	138	39	28	100	69	76
PF3D7_0721900		V-type ATPase V0 subunit e, putative	16	3	4	3	5	8
PF3D7_0722000		conserved Plasmodium protein, unknown function	14	2	0	9	12	13
PF3D7_0722100	PELO	protein pelota homolog, putative	30	4	6	21	8	42
PF3D7_0722200	RALP1	rhoptry-associated leucine zipper-like protein 1	7	1	0	6	1	0
PF3D7_0722300		ubiquitin carboxyl-terminal hydrolase, putative	66	6	2	74	16	22
PF3D7_0722400	OLA1	Obg-like ATPase 1, putative	935	314	209	528	446	358
PF3D7_0722500	CWC15	pre-mRNA-splicing factor CWC15, putative	255	22	21	158	68	123
PF3D7_0722600	UTP7	U3 small nucleolar RNA-associated protein 7, putative	141	23	12	70	49	100
PF3D7_0722700	C3AP1	respiratory chain complex 3 associated protein 1	31	23	13	18	16	16
PF3D7_0722800		conserved protein, unknown function	1	0	0	3	0	0
PF3D7_0722900		conserved protein, unknown function	0	0	0	0	0	0
PF3D7_0723000		tRNAHis guanylyltransferase, putative	2	0	0	0	2	1
PF3D7_0723100	CPH1	protein CPH1, putative	0	0	0	0	0	0
PF3D7_0723200		conserved Plasmodium protein, unknown function	0	0	0	0	0	0
PF3D7_0723300		conserved protein, unknown function	1	1	0	0	2	0
PF3D7_0723400		conserved Plasmodium protein, unknown function	805	26	15	586	101	104
PF3D7_0723500		dynactin subunit 5, putative	6	0	3	5	0	4
PF3D7_0723600		proteasome assembly chaperone 4, putative	90	63	26	63	46	97
PF3D7_0723700		metallo-hydrolase/oxidoreductase, putative	183	18	9	55	16	22
PF3D7_0723800		conserved Plasmodium protein, unknown function	5	1	0	3	3	1
PF3D7_0723900		RNA-binding protein, putative	508	67	32	346	145	129
PF3D7_0724000		Rab GTPase activator and protein kinase, putative	3	0	0	0	1	2
PF3D7_0724100		conserved Plasmodium protein, unknown function	327	17	5	284	44	54
PF3D7_0724200	TAP42	type 2A phosphatase-associated protein 42, putative	57	18	14	50	24	33
PF3D7_0724300	COQ3	ubiquinone biosynthesis O-methyltransferase, putative	2	3	1	0	2	1
PF3D7_0724400	PAM18	mitochondrial import inner membrane translocase subunit TIM14, putative	30	13	11	37	24	40
PF3D7_0724500		conserved Plasmodium protein, unknown function	16	1	0	5	3	8
PF3D7_0724600		protein kinase, putative	14	1	0	5	1	3
PF3D7_0724700	BDP6	bromodomain protein 6, putative	269	24	18	214	39	102
PF3D7_0724800		kelch domain-containing protein, putative	0	1	1	0	0	0
PF3D7_0724900		kinesin-20, putative	1	0	1	0	0	0
PF3D7_0725000		exonuclease I, putative	3	1	1	4	1	0
PF3D7_0725100		conserved Plasmodium membrane protein, unknown function	56	2	0	29	14	26
PF3D7_0725200		mago nashi protein homologue, putative	8	3	0	6	7	9
PF3D7_0725300		conserved protein, unknown function	452	54	28	271	120	104
PF3D7_0725400		conserved Plasmodium protein, unknown function	3	7	10	2	7	2
PF3D7_0726050		conserved Plasmodium protein, unknown function	8	3	1	3	1	14
PF3D7_0726100		Plasmodium exported protein, unknown function	206	17	23	128	31	186
PF3D7_0726200	FIKK7.1	serine/threonine protein kinase, FIKK family	302	197	26	110	101	211
PF3D7_0726300	PMS1	DNA mismatch repair protein PMS1, putative	74	5	8	37	4	23
PF3D7_0726400		conserved Plasmodium membrane protein, unknown function	94	2	5	79	8	21
PF3D7_0726500		ubiquitin carboxyl-terminal hydrolase, putative	473	40	29	359	71	192
PF3D7_0726600		conserved Plasmodium protein, unknown function	11	0	0	3	2	0
PF3D7_0726700		conserved Plasmodium protein, unknown function	2	3	0	0	1	1
PF3D7_0726800	OST2	dolichyl-diphosphooligosaccharide--protein glycosyltransferase subunit OST2, putative	0	0	0	0	0	0
PF3D7_0726900	TIM50	mitochondrial import inner membrane translocase subunit TIM50, putative	18	9	1	4	6	5
PF3D7_0727000	VPS53	vacuolar protein sorting-associated protein 53, putative	45	5	1	31	10	13
PF3D7_0727100		conserved protein, unknown function	6	2	0	1	2	2
PF3D7_0727200	NFS1	cysteine desulfurase IscS	300	115	86	206	100	215
PF3D7_0727300	DNMT	DNA (cytosine-5)-methyltransferase	41	9	5	31	12	25
PF3D7_0727400		proteasome subunit alpha type-5, putative	433	232	165	226	235	290
PF3D7_0727500		mTERF domain-containing protein, putative	1	0	0	0	0	0
PF3D7_0727600		conserved Plasmodium protein, unknown function	2	0	0	0	0	1
PF3D7_0727700		conserved Plasmodium protein, unknown function	4	1	0	1	2	2
PF3D7_0727800		cation transporting ATPase, putative	161	36	10	129	38	67
PF3D7_0727900		conserved Plasmodium protein, unknown function	102	15	3	89	15	29
PF3D7_0728000	eIF2alpha	eukaryotic translation initiation factor 2 subunit alpha	723	502	258	531	303	673
PF3D7_0728100		anaphase-promoting complex subunit 1, putative	0	0	0	0	0	0
PF3D7_0728200	ALP3	actin-like protein, putative	0	0	0	0	0	0
PF3D7_0728300		conserved protein, unknown function	0	3	0	0	1	0
PF3D7_0728400		SDH5 domain-containing protein, putative	0	0	0	0	0	0
PF3D7_0728500		EF hand domain-containing protein, putative	0	0	0	0	0	0
PF3D7_0728600		RING zinc finger protein, putative	2	2	0	0	0	1
PF3D7_0728700		alpha/beta hydrolase, putative	0	0	0	0	0	0
PF3D7_0728800		conserved Plasmodium protein, unknown function	1	0	0	0	0	0
PF3D7_0728900		RNA-binding protein, putative	80	10	7	47	21	67
PF3D7_0729000	SRP9	signal recognition particle subunit SRP9	18	6	7	11	13	18
PF3D7_0729100		allantoicase, putative	103	6	1	37	4	4
PF3D7_0729200	AOP	1-cys peroxiredoxin	0	1	0	0	0	0
PF3D7_0729300	NMD3	60S ribosomal export protein NMD3, putative	68	3	2	39	17	24
PF3D7_0729400		ribosome biogenesis protein BRX1, putative	513	126	66	360	213	178
PF3D7_0729500	MT-A70	N6-adenosine-methyltransferase MT-A70	124	25	12	119	31	100
PF3D7_0729600	CMC1	COX assembly mitochondrial protein, putative	1	3	0	0	0	1
PF3D7_0729700		zinc finger protein, putative	0	0	0	0	0	0
PF3D7_0729800		dynein light chain, putative	0	0	0	0	0	0
PF3D7_0729900		dynein heavy chain, putative	6	2	1	3	2	8
PF3D7_0730000		conserved protein, unknown function	1	0	0	1	2	1
PF3D7_0730100		tRNA pseudouridine synthase D, putative	0	2	0	3	1	1
PF3D7_0730200		AP-4 complex subunit beta, putative	27	15	4	20	16	15
PF3D7_0730300	ApiAP2	AP2 domain transcription factor AP2-L, putative	2045	410	172	1531	373	1792
PF3D7_0730400	IMP2	IMP1-like protein, putative	8	5	1	4	1	1
PF3D7_0730500		conserved Plasmodium protein, unknown function	3	0	0	0	0	1
PF3D7_0730800		Plasmodium exported protein, unknown function	3864	1449	1006	3595	1772	3115
PF3D7_0730900	PTP4	EMP1-trafficking protein	1773	380	51	704	169	575
PF3D7_0731100	PTP2	EMP1-trafficking protein	2649	1031	843	4637	1340	5475
PF3D7_0731200		Plasmodium exported protein, unknown function	45	8	14	32	17	26
PF3D7_0731300	PfG174	Plasmodium exported protein (PHISTb), unknown function	555	257	94	209	197	504
PF3D7_0731500	EBA175	erythrocyte binding antigen-175	218	80	155	142	55	57
PF3D7_0731600	ACS5	acyl-CoA synthetase	56	24	1	56	23	86
PF3D7_0731700		Plasmodium exported protein (hyp9), unknown function	1	1	0	0	0	2
PF3D7_0731800	GEXP08	alpha/beta hydrolase, putative	30	5	1	15	1	18
PF3D7_0732000		stevor	0	0	0	0	0	0
PF3D7_0732200	RIF	rifin	1	0	0	0	0	1
PF3D7_0732300	RIF	rifin	0	0	0	0	0	0
PF3D7_0732400	RIF	rifin	1	0	0	1	0	0
PF3D7_0732500	RIF	rifin	0	0	0	1	1	0
PF3D7_0732600		Plasmodium exported protein, unknown function, fragment	0	0	0	0	0	0
PF3D7_0732700	RIF	rifin	0	0	0	0	0	0
PF3D7_0732800		erythrocyte membrane protein 1 (PfEMP1), exon 2	0	0	0	0	0	0
PF3D7_0732900	RIF	rifin	2	0	0	1	48	5
PF3D7_0733000	VAR	erythrocyte membrane protein 1, PfEMP1	9	1	4	352	109	187
PF3D7_0800100	VAR	erythrocyte membrane protein 1, PfEMP1	47	23	11	212	91	93
PF3D7_0800200	VAR	erythrocyte membrane protein 1, PfEMP1	3	2	2	11	8	1
PF3D7_0800300	VAR	erythrocyte membrane protein 1, PfEMP1	5	2	1	48	22	26
PF3D7_0800400	RIF	rifin	0	0	0	0	1	0
PF3D7_0800500	RIF	rifin	0	0	0	0	0	0
PF3D7_0800600		Plasmodium exported protein (PHISTa), unknown function	0	0	0	0	0	0
PF3D7_0800700	SURF8.3	surface-associated interspersed protein 8.3 (SURFIN 8.3)	6	0	0	3	0	1
PF3D7_0800800		Plasmodium exported protein (hyp7), unknown function	0	0	0	0	0	0
PF3D7_0801000		Plasmodium exported protein (PHISTc)	4037	1276	522	2802	1017	1466
PF3D7_0801300	WARP	von Willebrand factor A domain-related protein	0	0	0	2	0	0
PF3D7_0801400		conserved Plasmodium protein, unknown function	0	0	0	0	0	0
PF3D7_0801500	NOL10	nucleolar protein 10, putative	70	32	8	61	41	58
PF3D7_0801600		conserved protein, unknown function	0	0	0	0	0	0
PF3D7_0801700	SENP2	sentrin-specific protease 2, putative	82	11	1	53	16	12
PF3D7_0801800		mannose-6-phosphate isomerase, putative	1236	279	88	755	317	558
PF3D7_0801900	LSD2	lysine-specific histone demethylase, putative	192	3	5	67	11	21
PF3D7_0802000	GDH3	glutamate dehydrogenase, putative	1418	472	173	598	615	626
PF3D7_0802100	AP2-LT	AP2 domain transcription factor AP2-LT	4	0	2	1	1	0
PF3D7_0802200	1-CysPxn	1-cys peroxiredoxin	59	25	2	16	31	45
PF3D7_0802300	PWP2	periodic tryptophan protein 2, putative	522	93	72	342	181	170
PF3D7_0802400		cyclin-like protein, putative	161	49	31	135	67	147
PF3D7_0802500		inositol 5-phosphatase, putative	55	11	3	49	13	42
PF3D7_0802600	ACbeta	adenylyl cyclase beta	18	4	0	11	0	1
PF3D7_0802700		conserved Plasmodium protein, unknown function	1	0	0	0	0	0
PF3D7_0802800	CNA	serine/threonine protein phosphatase 2B catalytic subunit A	0	1	4	0	0	1
PF3D7_0802900		conserved Plasmodium protein, unknown function	0	0	1	2	0	3
PF3D7_0803000	CYP81	peptidyl-prolyl cis-trans isomerase	99	20	4	91	38	41
PF3D7_0803100	UTP14	U3 small nucleolar RNA-associated protein 14, putative	145	7	1	103	13	54
PF3D7_0803200		filament assembling protein, putative	1	1	0	0	1	0
PF3D7_0803300	MORG1	mitogen-activated protein kinase organizer 1, putative	1	0	0	0	0	2
PF3D7_0803400	RAD54	DNA repair and recombination protein RAD54, putative	0	0	1	1	2	0
PF3D7_0803500		AAA family ATPase, putative	44	11	7	42	18	29
PF3D7_0803600		conserved Plasmodium protein, unknown function	80	11	9	70	20	49
PF3D7_0803700	g-tub	tubulin gamma chain	11	19	1	2	5	6
PF3D7_0803800		proteasome subunit beta type-4	187	57	24	107	90	164
PF3D7_0804000		cactin homolog, putative	519	85	38	376	154	218
PF3D7_0804300		zinc finger protein, putative	301	24	14	160	61	50
PF3D7_0804400	METAP1c	methionine aminopeptidase 1c, putative	3	2	0	2	0	2
PF3D7_0804500		conserved Plasmodium membrane protein, unknown function	307	27	10	229	40	46
PF3D7_0804600		tRNA pseudouridine synthase, putative	62	10	10	37	11	27
PF3D7_0804700		conserved Plasmodium protein, unknown function	6	1	0	4	0	4
PF3D7_0804800	CYP24	peptidyl-prolyl cis-trans isomerase	37	11	5	24	13	43
PF3D7_0804900		GTPase-activating protein, putative	84	40	20	58	40	97
PF3D7_0805000		alpha/beta hydrolase, putative	0	0	0	0	0	0
PF3D7_0805100		conserved protein, unknown function	0	0	0	0	0	0
PF3D7_0805200	GAMER	gamete release protein, putative	16	15	34	9	4	4
PF3D7_0805300		zinc finger protein, putative	0	0	0	0	0	0
PF3D7_0805400		N-acetyltransferase, GNAT family, putative	7	4	4	4	7	7
PF3D7_0805500		conserved Plasmodium protein, unknown function	51	2	3	40	10	17
PF3D7_0805600	PAP2	phosphatidic acid phosphatase 2	139	46	33	83	57	75
PF3D7_0805700	FIKK8	serine/threonine protein kinase, FIKK family	2	1	0	0	0	0
PF3D7_0805800		conserved Plasmodium protein, unknown function	0	0	0	0	0	0
PF3D7_0805900		conserved protein, unknown function	8	3	2	4	3	22
PF3D7_0806000		AAA family ATPase, putative	28	6	1	27	4	23
PF3D7_0806100		conserved Plasmodium protein, unknown function	25	2	1	20	15	13
PF3D7_0806200	DPY19	Dpy-19-like C-mannosyltransferase	0	0	0	0	0	0
PF3D7_0806300	FLP	ferlin-like protein, putative	0	0	0	4	0	2
PF3D7_0806400	ALG13	UDP-N-acetylglucosamine transferase subunit ALG13, putative	0	0	0	0	0	0
PF3D7_0806500		DnaJ protein, putative	178	105	44	149	94	169
PF3D7_0806600		kinesin-like protein, putative	78	6	6	61	12	61
PF3D7_0806700		conserved Plasmodium membrane protein, unknown function	308	16	10	247	35	83
PF3D7_0806800		V-type proton ATPase subunit a, putative	1430	306	275	750	351	634
PF3D7_0806900		YEATS domain-containing protein, putative	11	0	2	1	2	5
PF3D7_0807000		conserved protein, unknown function	42	34	14	29	23	75
PF3D7_0807100	PSH3	DNA helicase PSH3	85	9	1	57	30	43
PF3D7_0807200		conserved Plasmodium membrane protein, unknown function	187	60	36	101	133	120
PF3D7_0807300	RAB18	ras-related protein Rab-18	233	195	89	96	68	361
PF3D7_0807400	COQ10	coenzyme Q-binding protein COQ10 homolog, mitochondrial	0	0	0	0	0	0
PF3D7_0807500		proteasome subunit alpha type-6, putative	148	112	40	122	77	198
PF3D7_0807600		conserved Plasmodium protein, unknown function	501	78	13	475	93	240
PF3D7_0807700	DegP	serine protease DegP	162	7	8	49	11	27
PF3D7_0807800	RPN10	26S proteasome regulatory subunit RPN10, putative	108	30	19	79	53	131
PF3D7_0807900	TyrRS	tyrosine--tRNA ligase	499	327	124	320	224	422
PF3D7_0808000		conserved Plasmodium protein, unknown function	9	0	1	1	1	3
PF3D7_0808100		AP-3 complex subunit delta, putative	44	10	2	29	14	38
PF3D7_0808200	PMX	plasmepsin X	12	17	14	7	6	10
PF3D7_0808300		ubiquitin regulatory protein, putative	154	45	37	125	59	137
PF3D7_0808400	SEC28	coatomer subunit epsilon, putative	8	3	3	7	6	15
PF3D7_0808450	MPODD	protein MPODD, putative	0	0	0	0	0	0
PF3D7_0808600	VAR	erythrocyte membrane protein 1, PfEMP1	17	2	6	1173	447	562
PF3D7_0808700	VAR	erythrocyte membrane protein 1, PfEMP1	3	3	1	289	75	106
PF3D7_0808800	RIF	rifin	0	0	0	0	0	0
PF3D7_0808900	RIF	rifin	0	1	0	0	10	0
PF3D7_0809100	VAR	erythrocyte membrane protein 1, PfEMP1	27	4	10	1701	688	789
PF3D7_0809200	pfa55-14	asparagine-rich antigen Pfa55-14	36	0	1	13	14	3
PF3D7_0809250	C4AP5	respiratory chain complex 4 associated protein 5	0	1	0	0	0	0
PF3D7_0809400		conserved protein, unknown function	2	0	0	0	0	0
PF3D7_0809500		histone acetyltransferase subunit NuA4, putative	9	7	4	4	5	37
PF3D7_0809600		peptidase family C50, putative	1	1	0	1	0	0
PF3D7_0809700	RUVB1	RuvB-like helicase 1	1	0	0	0	0	0
PF3D7_0809800		conserved Plasmodium protein, unknown function	4	1	0	2	0	0
PF3D7_0809900	JmjC1	JmjC domain-containing protein 1, putative	153	22	9	124	28	80
PF3D7_0810000		acyl-CoA binding protein, putative	15	7	1	7	8	49
PF3D7_0810100		ribosomal protein L33, apicoplast, putative	0	0	0	0	0	0
PF3D7_0810200	ABCK1	ABC1 family, putative	0	0	0	0	0	0
PF3D7_0810300	PPM5	protein phosphatase PPM5, putative	16	19	1	7	15	20
PF3D7_0810400	AQP2	aquaporin, putative	8	7	3	4	4	6
PF3D7_0810500	PPM7	protein phosphatase PPM7, putative	141	55	21	106	57	110
PF3D7_0810600	DBP1	ATP-dependent RNA helicase DBP1, putative	445	46	12	283	89	215
PF3D7_0810700		conserved Plasmodium protein, unknown function	0	1	0	1	4	1
PF3D7_0810800	PPPK-DHPS	hydroxymethyldihydropterin pyrophosphokinase-dihydropteroate synthase	17	6	1	18	24	43
PF3D7_0810900		conserved Plasmodium protein, unknown function	0	0	0	0	0	0
PF3D7_0811000	CUL1	cullin-1, putative	0	0	0	0	0	0
PF3D7_0811100		mitochondrial carrier protein, putative	3	0	0	0	0	0
PF3D7_0811200	EMC1	ER membrane protein complex subunit 1, putative	39	3	0	10	6	19
PF3D7_0811300	CAF1	CCR4-associated factor 1	1438	55	19	997	104	304
PF3D7_0811400		conserved protein, unknown function	1243	197	115	886	368	535
PF3D7_0811500	CARM1	histone-arginine methyltransferase CARM1, putative	19	1	0	6	2	1
PF3D7_0811600		conserved protein, unknown function	31	20	4	6	6	12
PF3D7_0811700		conserved Plasmodium protein, unknown function	0	0	0	0	0	0
PF3D7_0811800		conserved Plasmodium protein, unknown function	4	0	0	2	1	0
PF3D7_0811900		RNA-binding protein, putative	5	2	0	3	1	3
PF3D7_0812000		conserved protein, unknown function	3	1	0	1	1	1
PF3D7_0812100		proteasome activator complex subunit 4, putative	79	9	3	93	20	33
PF3D7_0812200	YihA3	GTP-binding protein YihA3	1	0	0	1	0	0
PF3D7_0812220		trypsin-like serine protease, putative	1	2	0	1	1	0
PF3D7_0812300	SSP3	sporozoite surface protein 3, putative	0	2	0	1	1	1
PF3D7_0812400	KARalpha	karyopherin alpha	336	394	112	266	201	497
PF3D7_0812500		RNA-binding protein, putative	633	32	17	495	68	145
PF3D7_0812600		ubiquitin-conjugating enzyme E2, putative	175	58	75	116	83	94
PF3D7_0812700	SNRPC	U1 small nuclear ribonucleoprotein C, putative	51	11	4	23	18	21
PF3D7_0812800		zinc finger protein, putative	1	0	0	0	0	5
PF3D7_0812900		conserved Plasmodium protein, unknown function	3	1	0	2	0	0
PF3D7_0813000	KIC7	protein KIC7	69	14	6	53	23	46
PF3D7_0813100		conserved Plasmodium protein, unknown function	0	0	0	0	0	0
PF3D7_0813200		CS domain protein, putative	31	13	1	11	13	17
PF3D7_0813300		NPL domain-containing protein, putative	3281	906	377	1882	1630	979
PF3D7_0813400		conserved protein, unknown function	783	144	70	764	371	812
PF3D7_0813500		PUB domain-containing protein, putative	2	2	1	1	1	3
PF3D7_0813600		translation initiation factor SUI1, putative	183	30	10	166	62	136
PF3D7_0813700	ABCF1	ABC transporter F family member 1	38	5	2	18	11	6
PF3D7_0813800	GMD	GDP-mannose 4,6-dehydratase	0	0	0	0	0	0
PF3D7_0813900	RPS16	40S ribosomal protein S16, putative	1777	1166	667	1156	894	1953
PF3D7_0814000		60S ribosomal protein L13-2, putative	3806	1107	520	2561	1694	2013
PF3D7_0814100		conserved Plasmodium protein, unknown function	11	0	2	2	2	1
PF3D7_0814200	ALBA1	DNA/RNA-binding protein Alba 1	8230	479	281	5530	1608	1849
PF3D7_0814300		AAA family ATPase, putative	78	6	5	67	20	45
PF3D7_0814400		phospholipase DDHD1, putative	7	0	2	3	0	0
PF3D7_0814500		conserved protein, unknown function	20	1	1	29	6	9
PF3D7_0814600	PIMMS22	PIMMS22 protein, putative	0	0	0	0	0	0
PF3D7_0814700		conserved Plasmodium protein, unknown function	1	0	0	1	0	1
PF3D7_0814900	FeSOD	superoxide dismutase [Fe]	155	86	27	111	51	176
PF3D7_0815000	Sel3	selenoprotein	2	1	0	1	0	0
PF3D7_0815100		heptatricopeptide repeat and RAP domain-containing protein, putative	0	0	0	0	0	1
PF3D7_0815200		importin subunit beta, putative	300	105	61	178	76	265
PF3D7_0815300		FAD-dependent monooxygenase, putative	1	0	0	0	1	0
PF3D7_0815400	ATPTG3	ATP synthase-associated protein, putative	0	1	0	0	0	0
PF3D7_0815500		conserved Plasmodium protein, unknown function	0	0	0	0	0	1
PF3D7_0815600	EIF3G	eukaryotic translation initiation factor 3 subunit G, putative	1317	236	265	804	538	519
PF3D7_0815700	Ub	ubiquitin	1	0	0	0	0	0
PF3D7_0815800	VPS9	vacuolar protein sorting-associated protein 9, putative	70	25	1	25	18	23
PF3D7_0815900	aLipDH	dihydrolipoyl dehydrogenase, apicoplast	1	1	0	0	0	1
PF3D7_0816000	RRB1	ribosome assembly protein RRB1, putative	53	16	5	21	18	68
PF3D7_0816100	PPCDC	phosphopantothenoylcysteine decarboxylase, putative	41	16	14	34	17	48
PF3D7_0816200	VPS2	vacuolar protein sorting-associated protein 2, putative	0	0	0	0	0	0
PF3D7_0816300		HAP2-GCS1 domain-containing protein, putative	0	0	0	2	0	0
PF3D7_0816400		EF-hand calcium-binding domain-containing protein, putative	0	0	0	1	0	0
PF3D7_0816500	HSP20	small heat shock protein HSP20, putative	0	0	0	0	0	0
PF3D7_0816600	ClpB1	chaperone protein ClpB1	18	38	3	4	19	10
PF3D7_0816700	TRAPPC2L	trafficking protein particle complex subunit 2-like protein, putative	0	1	0	0	1	0
PF3D7_0816800	DMC1	meiotic recombination protein DMC1, putative	0	0	0	0	0	0
PF3D7_0816900	AK2	adenylate kinase 2	0	0	0	0	0	0
PF3D7_0817000	UBA3	NEDD8-activating enzyme E1 catalytic subunit, putative	0	0	0	0	0	0
PF3D7_0817100		tRNA modification GTPase, putative	0	0	0	0	0	1
PF3D7_0817200		conserved protein, unknown function	16	0	0	10	4	1
PF3D7_0817300		conserved Plasmodium protein, unknown function	417	256	23	99	184	191
PF3D7_0817400		phosphatase, putative	2	3	1	2	1	1
PF3D7_0817500	HINT1	histidine triad nucleotide-binding protein 1	1184	193	233	883	651	565
PF3D7_0817600		conserved protein, unknown function	1	1	3	1	1	1
PF3D7_0817700	RON5	rhoptry neck protein 5	4	5	5	0	3	5
PF3D7_0817800	C3AP3	respiratory chain complex 3 associated protein 3	0	0	0	0	0	0
PF3D7_0817900	HMGB2	high mobility group protein B2	328	129	130	182	153	213
PF3D7_0818000	SNRNP27	U4/U6.U5 small nuclear ribonucleoprotein, putative	503	72	76	280	127	139
PF3D7_0818100		zinc finger protein, putative	1	1	1	2	0	1
PF3D7_0818200	14-3-3I	14-3-3 protein	4486	1725	1367	2797	1844	1970
PF3D7_0818300		dynactin subunit 6, putative	4	0	0	0	0	2
PF3D7_0818400	FCF1	rRNA-processing protein FCF1, putative	34	16	3	12	11	38
PF3D7_0818500		zinc finger protein, putative	541	77	81	364	187	319
PF3D7_0818600	PBLP	BEM46-like protein, putative	26	0	2	9	2	14
PF3D7_0818700		DNA helicase, putative	575	50	46	472	130	305
PF3D7_0818800	IMP4	U3 small nucleolar ribonucleoprotein protein IMP4, putative	40	17	21	31	18	41
PF3D7_0818900	HSP70	heat shock protein 70	16472	7971	4185	10680	6996	9351
PF3D7_0819000		ribonuclease, putative	169	38	9	135	38	99
PF3D7_0819100		BRIX domain, putative	19	2	3	8	4	5
PF3D7_0819200	PLP5	perforin-like protein 5	9	2	2	5	1	3
PF3D7_0819300		conserved Plasmodium protein, unknown function	0	0	0	1	0	0
PF3D7_0819400	PLP4	perforin-like protein 4	0	0	0	0	0	0
PF3D7_0819500		conserved protein, unknown function	25	54	7	11	31	29
PF3D7_0819600		ubiquitin-like protein, putative	31	11	2	18	28	12
PF3D7_0819700		conserved Plasmodium protein, unknown function	0	0	0	0	0	0
PF3D7_0819800		conserved Plasmodium protein, unknown function	4	0	0	2	0	2
PF3D7_0819900	LSM3	U6 snRNA-associated Sm-like protein LSm3, putative	6	5	0	1	0	12
PF3D7_0820000	SRCAP	Snf2-related CBP activator, putative	452	140	38	347	89	291
PF3D7_0820100		RNA-binding protein, putative	1	2	0	0	3	2
PF3D7_0820200	PGPS	phosphatidylglycerophosphate synthase	47	4	1	13	10	12
PF3D7_0820300		conserved Plasmodium protein, unknown function	745	100	54	446	187	250
PF3D7_0820400		conserved Plasmodium protein, unknown function	0	0	0	0	0	0
PF3D7_0820500	YIF1	protein transport protein YIF1, putative	129	21	12	66	35	101
PF3D7_0820600		conserved protein, unknown function	0	0	0	1	0	0
PF3D7_0820700	KDH	2-oxoglutarate dehydrogenase E1 component	8	8	3	13	5	12
PF3D7_0820800		conserved Plasmodium protein, unknown function	2	2	0	0	0	1
PF3D7_0820900		conserved Plasmodium protein, unknown function	15	0	0	15	2	3
PF3D7_0821000		conserved Plasmodium protein, unknown function	1	3	0	1	4	0
PF3D7_0821100	PK1	protein kinase 1	257	26	25	165	66	80
PF3D7_0821200		conserved protein, unknown function	39	12	8	21	17	41
PF3D7_0821300	DHX36	ATP-dependent RNA helicase DHX36, putative	178	46	26	111	40	79
PF3D7_0821400		conserved Plasmodium protein, unknown function	205	74	66	122	55	209
PF3D7_0821500	NEP1	ribosomal RNA small subunit methyltransferase NEP1, putative	18	2	2	9	6	7
PF3D7_0821600	CLP1	polyribonucleotide 5'-hydroxyl-kinase Clp1, putative	79	10	7	52	25	84
PF3D7_0821700		60S ribosomal protein L22, putative	265	159	54	140	110	512
PF3D7_0821800	SEC61B	protein transport protein SEC61 subunit beta, putative	69	76	23	43	54	189
PF3D7_0821900		WPP motif-containing protein, putative	0	6	0	0	2	1
PF3D7_0822000		ribosomal protein L4, mitochondrial, putative	0	3	0	3	0	1
PF3D7_0822100	MED7	mediator of RNA polymerase II transcription subunit 7, putative	76	11	6	44	22	30
PF3D7_0822200		phosphorylated CTD interacting factor 1 WW domain-containing protein, putative	8	2	0	6	1	0
PF3D7_0822300	SNRPG	small nuclear ribonucleoprotein G, putative	33	26	20	22	27	73
PF3D7_0822400		conserved Plasmodium protein, unknown function	5	1	0	2	2	8
PF3D7_0822500	DLC1	dynein light chain 1	1	0	0	1	0	1
PF3D7_0822600	SEC23	protein transport protein SEC23	897	178	202	659	213	582
PF3D7_0822700	TRP1	thrombospondin-related protein 1, putative	2	0	0	0	0	0
PF3D7_0822800	SNRNP40	U5 small nuclear ribonucleoprotein 40 kDa protein, putative	67	32	20	52	27	70
PF3D7_0822900	PIC2	PhIL1-interacting candidate PIC2	5	1	0	2	0	2
PF3D7_0823000	VPS15	serine/threonine protein kinase VPS15, putative	21	5	3	14	6	13
PF3D7_0823100		RWD domain-containing protein, putative	84	38	12	42	35	152
PF3D7_0823200		RNA-binding protein, putative	14609	3391	4316	3884	3003	2555
PF3D7_0823300	GCN5	histone acetyltransferase GCN5	491	111	20	308	102	163
PF3D7_0823400		alpha/beta hydrolase, putative	1	0	0	0	0	0
PF3D7_0823500	IMC1i	inner membrane complex protein 1i, putative	10	0	0	0	1	3
PF3D7_0823600	LipB	lipoate-protein ligase B	19	0	2	3	0	4
PF3D7_0823700	TOM7	mitochondrial import receptor subunit TOM7, putative	4	0	3	4	4	1
PF3D7_0823800		DnaJ protein, putative	102	63	14	73	55	125
PF3D7_0823900	DTC	dicarboxylate/tricarboxylate carrier	14	21	4	14	13	27
PF3D7_0824000		conserved Plasmodium protein, unknown function	0	0	0	0	0	0
PF3D7_0824100		3'-5' exonuclease, putative	0	0	0	0	0	0
PF3D7_0824200		conserved Plasmodium protein, unknown function	1	2	0	2	0	4
PF3D7_0824300	Obg2	GTP-binding protein Obg2, putative	0	0	0	0	0	0
PF3D7_0824400	NT2	nucleoside transporter 2	17	13	2	8	13	12
PF3D7_0824500		conserved protein, unknown function	3	1	0	1	3	4
PF3D7_0824600	DRE2	Fe-S cluster assembly protein DRE2, putative	15	8	0	17	12	27
PF3D7_0824700	LMF1	lipase maturation factor, putative	0	0	0	0	0	0
PF3D7_0824800		conserved Plasmodium membrane protein, unknown function	55	3	3	30	4	13
PF3D7_0824900		conserved Plasmodium protein, unknown function	28	3	0	20	8	4
PF3D7_0825000		conserved Plasmodium protein, unknown function	21	3	1	23	2	6
PF3D7_0825100		ankyrin-repeat protein, putative	0	0	0	0	0	0
PF3D7_0825200	IF3a	translation initiation factor IF-3	0	0	0	1	0	1
PF3D7_0825300		SAYSvFN domain-containing protein, putative	0	0	0	0	0	0
PF3D7_0825400	ATPTG15	ATP synthase-associated protein, putative	0	0	0	0	0	0
PF3D7_0825500	KRI1	protein KRI1, putative	85	4	3	38	17	29
PF3D7_0825600	COA5	cytochrome c oxidase assembly factor 5, putative	0	0	0	0	0	1
PF3D7_0825700	CryPH	crystalloid-specific PH domain-containing protein, putative	0	0	0	0	0	0
PF3D7_0825800		PH-like domain-containing protein, putative	1	0	0	0	0	1
PF3D7_0825900		conserved Plasmodium protein, unknown function	1	0	0	0	0	1
PF3D7_0826000		conserved Plasmodium protein, unknown function	5	1	0	0	1	1
PF3D7_0826100	HEUL	HECT-like E3 ubiquitin ligase, putative	1841	95	23	1358	88	272
PF3D7_0826200		alpha/beta hydrolase, putative	0	0	0	0	0	0
PF3D7_0826300		SPRY domain, putative	1	0	1	0	2	1
PF3D7_0826400	CPT	cis-prenyltransferase	0	0	0	0	0	0
PF3D7_0826500	UBE4B	ubiquitin conjugation factor E4 B, putative	288	55	28	221	104	149
PF3D7_0826600	VAMP7	SNARE protein, putative	15	1	1	3	4	4
PF3D7_0826700	RACK1	receptor for activated c kinase	4684	2813	1295	3440	2348	4233
PF3D7_0826900		conserved Plasmodium protein, unknown function	9	1	1	2	1	2
[truncated: 3,286 more rows]

## Sheet: DEseq2_DEgenes
gene	name	description	baseMean	log2FoldChange	lfcSE	stat	pvalue	padj
PF3D7_1200600	VAR2CSA	erythrocyte membrane protein 1, PfEMP1	17491	3.35724	0.633017	5.30355	1.13569e-07	7.33213e-06
PF3D7_0805200	GAMER	gamete release protein, putative	24.6278	3.2852	0.928257	3.53911	0.000401484	0.0189773
PF3D7_1342600	MyoA	myosin A	61.645	2.96286	0.833222	3.55591	0.000376676	0.018201
PF3D7_0823200		RNA-binding protein, putative	5407.58	1.66816	0.512171	3.25704	0.0011258	0.0465625
PF3D7_1372000		Plasmodium exported protein (PHISTa), unknown function	433.952	1.36766	0.40254	3.39758	0.000679836	0.0299921
PF3D7_0831700	HSP70x	heat shock protein 70	10311.1	-1.3471	0.411189	-3.27611	0.00105247	0.0442203
PF3D7_0800100	VAR	erythrocyte membrane protein 1, PfEMP1	66.1291	-1.82898	0.554553	-3.29811	0.000973382	0.0415571
PF3D7_1372200	HRPIII	histidine-rich protein III	789.711	-2.17778	0.553414	-3.93518	8.31341e-05	0.00431482
PF3D7_1035800	M712	probable protein, unknown function	226.384	-2.37791	0.450045	-5.28372	1.26589e-07	7.97811e-06
PF3D7_0113000	GARP	glutamic acid-rich protein GARP	936.641	-2.56272	0.767022	-3.34113	0.000834384	0.0362068
PF3D7_0424900		Plasmodium exported protein (PHISTa), unknown function	15.2689	-2.90988	0.844388	-3.44614	0.000568651	0.0264073
PF3D7_0426000	VAR	erythrocyte membrane protein 1, PfEMP1	51.9633	-2.97144	0.754135	-3.9402	8.14133e-05	0.00431002
PF3D7_1229300	PIC1	PhIL1-interacting candidate PIC1	45.2611	-2.98295	0.764972	-3.89943	9.64204e-05	0.00490817
PF3D7_0425800	VAR	erythrocyte membrane protein 1, PfEMP1	35.1073	-3.01104	0.683796	-4.40342	1.06557e-05	0.000600122
PF3D7_1300300	VAR	erythrocyte membrane protein 1, PfEMP1	39.0433	-3.10971	0.700279	-4.44068	8.96766e-06	0.00051603
PF3D7_1041300	VAR	erythrocyte membrane protein 1, PfEMP1	132.782	-3.23212	0.531425	-6.08199	1.18698e-09	9.81851e-08
PF3D7_0800300	VAR	erythrocyte membrane protein 1, PfEMP1	13.8104	-3.28498	0.872954	-3.76306	0.000167848	0.00838288
PF3D7_0324900	VAR	erythrocyte membrane protein 1, PfEMP1	53.2223	-3.29195	0.593061	-5.55077	2.84407e-08	2.03466e-06
PF3D7_1150400	VAR	erythrocyte membrane protein 1, PfEMP1	38.9699	-3.43388	0.718309	-4.78051	1.74855e-06	0.000102853
PF3D7_0500100	VAR	erythrocyte membrane protein 1, PfEMP1	85.0627	-3.61587	0.706788	-5.11591	3.12226e-07	1.922e-05
PF3D7_1100200	VAR	erythrocyte membrane protein 1, PfEMP1	56.3177	-3.69495	0.689898	-5.35578	8.51866e-08	5.63722e-06
PF3D7_0400400	VAR	erythrocyte membrane protein 1, PfEMP1	18.112	-3.72098	0.91273	-4.07676	4.56683e-05	0.00251842
PF3D7_0300100	VAR	erythrocyte membrane protein 1, PfEMP1	128.764	-3.77691	0.58815	-6.42168	1.3478e-10	1.18921e-08
PF3D7_0400100	VAR	erythrocyte membrane protein 1, PfEMP1	40.4401	-3.79378	0.679081	-5.58664	2.31504e-08	1.7022e-06
PF3D7_0712800	VAR	erythrocyte membrane protein 1, PfEMP1	85.7748	-3.80245	0.63193	-6.01721	1.77448e-09	1.38148e-07
PF3D7_1219300	VAR	erythrocyte membrane protein 1, PfEMP1	131.034	-3.82253	0.585399	-6.52979	6.58625e-11	6.01166e-09
PF3D7_0600200	VAR	erythrocyte membrane protein 1, PfEMP1	48.2925	-3.89461	0.723093	-5.38604	7.20261e-08	4.88854e-06
PF3D7_1000100	VAR	erythrocyte membrane protein 1, PfEMP1	117.586	-4.09929	0.619877	-6.61307	3.76429e-11	3.6904e-09
PF3D7_1240300	VAR	erythrocyte membrane protein 1, PfEMP1	236.513	-4.14504	0.494324	-8.38526	5.06139e-17	8.37343e-15
PF3D7_0100300	VAR	erythrocyte membrane protein 1, PfEMP1	7.81184	-4.23093	1.2313	-3.43614	0.000590073	0.0265842
PF3D7_1255200	VAR	erythrocyte membrane protein 1, PfEMP1	87.8147	-4.37179	0.723543	-6.04219	1.52032e-09	1.21948e-07
PF3D7_0100100	VAR	erythrocyte membrane protein 1, PfEMP1	172.71	-4.67075	0.586717	-7.96082	1.70902e-15	2.15418e-13
PF3D7_0712300	VAR	erythrocyte membrane protein 1, PfEMP1	104.007	-4.8249	0.659933	-7.3112	2.64771e-13	3.04717e-11
PF3D7_1300100	VAR	erythrocyte membrane protein 1, PfEMP1	76.1681	-5.03845	0.855273	-5.89104	3.83767e-09	2.90237e-07
PF3D7_0833500	VAR	erythrocyte membrane protein 1, PfEMP1	293.03	-5.07661	0.578737	-8.77188	1.75702e-18	3.10055e-16
PF3D7_0733000	VAR	erythrocyte membrane protein 1, PfEMP1	83.521	-5.09913	0.701412	-7.2698	3.60011e-13	3.97062e-11
PF3D7_1200400	VAR	erythrocyte membrane protein 1, PfEMP1	70.8563	-5.11798	0.774742	-6.60604	3.94746e-11	3.73176e-09
PF3D7_0600400	VAR	erythrocyte membrane protein 1, PfEMP1	4.70203	-5.32224	1.54941	-3.435	0.000592545	0.0265842
PF3D7_0937800	VAR	erythrocyte membrane protein 1, PfEMP1	420.652	-5.34957	0.555656	-9.62749	6.12059e-22	1.47284e-19
PF3D7_1240900	VAR	erythrocyte membrane protein 1, PfEMP1	121.836	-5.38726	0.670415	-8.03571	9.30421e-16	1.23141e-13
PF3D7_1373500	VAR	erythrocyte membrane protein 1, PfEMP1	156.225	-5.47923	0.680913	-8.04688	8.49292e-16	1.1832e-13
PF3D7_0420900	VAR	erythrocyte membrane protein 1, PfEMP1	5.32728	-5.50435	1.5484	-3.55486	0.000378184	0.018201
PF3D7_0712900	VAR	erythrocyte membrane protein 1, PfEMP1	57.0628	-5.52424	0.829601	-6.65891	2.75857e-11	2.80844e-09
PF3D7_0808700	VAR	erythrocyte membrane protein 1, PfEMP1	59.5268	-5.55049	0.827381	-6.7085	1.96631e-11	2.08193e-09
PF3D7_0223500	VAR	erythrocyte membrane protein 1, PfEMP1	175.376	-5.78892	0.693806	-8.34372	7.19884e-17	1.05863e-14
PF3D7_0809100	VAR	erythrocyte membrane protein 1, PfEMP1	416.01	-5.82274	0.600266	-9.70027	3.00715e-22	7.95993e-20
PF3D7_0711700	VAR	erythrocyte membrane protein 1, PfEMP1	726.192	-5.85994	0.555863	-10.5421	5.52747e-26	2.09017e-23
PF3D7_0115700	VAR	erythrocyte membrane protein 1, PfEMP1	44.0563	-5.97312	0.957588	-6.23768	4.44122e-10	3.79223e-08
PF3D7_0420700	VAR	erythrocyte membrane protein 1, PfEMP1	26.9771	-5.99741	1.08922	-5.50614	3.66797e-08	2.55503e-06
PF3D7_0808600	VAR	erythrocyte membrane protein 1, PfEMP1	282.773	-6.07054	0.622592	-9.75043	1.83695e-22	5.40268e-20
PF3D7_1240400	VAR	erythrocyte membrane protein 1, PfEMP1	1118.77	-6.13234	0.590861	-10.3786	3.10144e-25	1.02619e-22
PF3D7_0421100	VAR	erythrocyte membrane protein 1, PfEMP1	16.7003	-6.17815	1.27891	-4.83081	1.35982e-06	8.18053e-05
PF3D7_1000200	RIF	rifin	15.3687	-6.20726	1.55667	-3.98752	6.67671e-05	0.00360678
PF3D7_0712600	VAR	erythrocyte membrane protein 1, PfEMP1	129.309	-6.2299	0.746422	-8.34636	7.04016e-17	1.05863e-14
PF3D7_0632500	VAR	erythrocyte membrane protein 1, PfEMP1	1921.96	-6.30271	0.565363	-11.1481	7.31691e-29	3.87357e-26
PF3D7_0200100	VAR	erythrocyte membrane protein 1, PfEMP1	156.001	-6.33063	0.669227	-9.45961	3.09095e-21	6.40143e-19
PF3D7_0412700	VAR	erythrocyte membrane protein 1, PfEMP1	124.278	-6.6514	0.863213	-7.7054	1.30434e-14	1.56935e-12
PF3D7_1240600	VAR	erythrocyte membrane protein 1, PfEMP1	786.881	-6.80825	0.58152	-11.7077	1.16423e-31	8.88202e-29
PF3D7_0632800	VAR	erythrocyte membrane protein 1, PfEMP1	389.343	-6.87118	0.620961	-11.0654	1.84654e-28	8.1463e-26
PF3D7_0421300	VAR	erythrocyte membrane protein 1, PfEMP1	217.39	-7.28456	0.770685	-9.45206	3.32229e-21	6.40143e-19
PF3D7_0412400	VAR	erythrocyte membrane protein 1, PfEMP1	635.744	-7.85412	0.632556	-12.4165	2.12736e-35	2.81556e-32
PF3D7_0712400	VAR	erythrocyte membrane protein 1, PfEMP1	556.728	-8.09807	0.692402	-11.6956	1.3422e-31	8.88202e-29
PF3D7_0617400	VAR	erythrocyte membrane protein 1, PfEMP1	1550.4	-8.77917	0.649915	-13.5082	1.39943e-41	3.7043e-38
PF3D7_0712000	VAR	erythrocyte membrane protein 1, PfEMP1	257.819	-8.87379	0.939018	-9.45008	3.38572e-21	6.40143e-19
