# Supplementary material for: Epigenetics and chromatin structure regulate var2csa expression and the placental binding phenotype in Plasmodium falciparum
Source: bioRxiv preprint, doi:10.1101/2023.11.14.567110, version 2 (2026-01-14)
Supplement: Supplemental Table 3 [file 567110_file09.xlsx]

## Sheet: Info
MeDIP-seq peak calling
Peak calling was performed using MACS2 with --mfold lower and upper limits set to 2 and 50, respectively.
NF54CSAh has 3 biological replicates and NF54 has 2 biological replicates.
Genes that contain any overlap with a peak are listed.
Differential peak calling using DiffBind found no significant differences between samples.
5mC
sample	total peaks	peaks in genes
NF54CSAh	7283	6824 (94%)
NF54	6469	6073 (94%)
5mC vs 5hmC vs 6mA
DNA mark	total peaks	peaks in genes
5mC	7283	6824 (94%)
5hmC	269	262 (97%)
6mA	0	N/A

## Sheet: NF54CSAh_5mC_peaks
chr	start	end	length	abs_summit	pileup	-log10(p-value)	fold_enrichment	-log10(q-value)	peak_name	gene	name	description
Pf3D7_01_v3	150	884	735	461	243	69.1677	3.94873	66.8708	CSA_5mC_peak_1	intergenic
Pf3D7_01_v3	966	5450	4485	1602	265	71.7978	3.79944	69.4292	CSA_5mC_peak_2	intergenic
Pf3D7_01_v3	5659	6480	822	6022	161	18.1008	2.15723	16.9596	CSA_5mC_peak_3	intergenic
Pf3D7_01_v3	8821	11398	2578	10759	246	52.0718	3.14283	50.2214	CSA_5mC_peak_4	intergenic
Pf3D7_01_v3	11701	12138	438	11909	142	13.8959	2.01686	12.8414	CSA_5mC_peak_5	intergenic
Pf3D7_01_v3	19570	19916	347	19753	137	14.0842	2.05682	13.0266	CSA_5mC_peak_6	intergenic
Pf3D7_01_v3	29489	32973	3485	31972	211	43.7288	3.08116	42.0823	CSA_5mC_peak_7	PF3D7_0100100	VAR	erythrocyte membrane protein 1, PfEMP1
Pf3D7_01_v3	33113	34201	1089	33390	227	44.0061	2.95361	42.3528	CSA_5mC_peak_8	PF3D7_0100100	VAR	erythrocyte membrane protein 1, PfEMP1
Pf3D7_01_v3	34260	34965	706	34534	169	29.8185	2.75117	28.4503	CSA_5mC_peak_9	PF3D7_0100100	VAR	erythrocyte membrane protein 1, PfEMP1
Pf3D7_01_v3	35373	35802	430	35582	173	31.6357	2.8159	30.2335	CSA_5mC_peak_10	PF3D7_0100100	VAR	erythrocyte membrane protein 1, PfEMP1
Pf3D7_01_v3	36717	37295	579	37144	148	20.965	2.41132	19.7658	CSA_5mC_peak_11	PF3D7_0100100	VAR	erythrocyte membrane protein 1, PfEMP1
Pf3D7_01_v3	39344	39734	391	39485	154	14.4698	1.98992	13.4036	CSA_5mC_peak_12	PF3D7_0100200	RIF	rifin
Pf3D7_01_v3	42475	42791	317	42596	136	16.4645	2.21712	15.3561	CSA_5mC_peak_13	PF3D7_0100300	VAR	erythrocyte membrane protein 1, PfEMP1
Pf3D7_01_v3	45438	46574	1137	45844	198	38.0369	2.92191	36.5106	CSA_5mC_peak_14	PF3D7_0100300	VAR	erythrocyte membrane protein 1, PfEMP1
Pf3D7_01_v3	54277	54692	416	54484	163	22.8461	2.408	21.6109	CSA_5mC_peak_15	PF3D7_0100600	RIF	rifin
Pf3D7_01_v3	62610	63229	620	62784	180	28.5949	2.59123	27.2502	CSA_5mC_peak_16	PF3D7_0100900	RIF	rifin
Pf3D7_01_v3	74748	75089	342	74916	163	27.169	2.65407	25.8512	CSA_5mC_peak_17	PF3D7_0101300	MC-2TM	Pfmc-2TM Maurer's cleft two transmembrane protein
Pf3D7_01_v3	82259	82654	396	82423	151	17.2134	2.16514	16.0901	CSA_5mC_peak_18	PF3D7_0101600	RIF	rifin
Pf3D7_01_v3	90595	91088	494	90865	216	41.7832	2.94443	40.1791	CSA_5mC_peak_19	PF3D7_0101900	RIF	rifin
Pf3D7_01_v3	95112	95516	405	95294	163	20.5467	2.28022	19.3565	CSA_5mC_peak_20	intergenic
Pf3D7_01_v3	99851	100527	677	100030	148	15.8075	2.09958	14.7127	CSA_5mC_peak_21	PF3D7_0102200	RESA	ring-infected erythrocyte surface antigen
Pf3D7_01_v3	101449	102512	1064	102133	241	67.9612	3.91637	65.6966	CSA_5mC_peak_22	PF3D7_0102200	RESA	ring-infected erythrocyte surface antigen
Pf3D7_01_v3	107875	108354	480	108148	144	18.1684	2.26874	17.026	CSA_5mC_peak_23	intergenic
Pf3D7_01_v3	111464	112423	960	111785	214	44.5729	3.09333	42.9068	CSA_5mC_peak_24	PF3D7_0102500	EBA181	erythrocyte binding antigen-181
Pf3D7_01_v3	112909	114116	1208	113184	353	129.756	5.07952	125.562	CSA_5mC_peak_25	PF3D7_0102500	EBA181	erythrocyte binding antigen-181
Pf3D7_01_v3	114726	115086	361	114901	169	16.2932	2.01939	15.1892	CSA_5mC_peak_26	PF3D7_0102500	EBA181	erythrocyte binding antigen-181
Pf3D7_01_v3	115154	115784	631	115581	185	23.1886	2.28536	21.9467	CSA_5mC_peak_27	PF3D7_0102500	EBA181	erythrocyte binding antigen-181
Pf3D7_01_v3	118626	118884	259	118746	143	15.9762	2.13964	14.8788	CSA_5mC_peak_28	PF3D7_0102600	FIKK1	serine/threonine protein kinase, FIKK family
Pf3D7_01_v3	119671	121013	1343	120277	247	47.496	2.94594	45.7614	CSA_5mC_peak_29	PF3D7_0102600	FIKK1	serine/threonine protein kinase, FIKK family
Pf3D7_01_v3	121933	122173	241	122062	136	14.9759	2.12038	13.8994	CSA_5mC_peak_30	PF3D7_0102600	FIKK1	serine/threonine protein kinase, FIKK family
Pf3D7_01_v3	127655	128070	416	127868	219	39.1098	2.79928	37.5615	CSA_5mC_peak_31	PF3D7_0102800		seipin domain-containing protein, putative
Pf3D7_01_v3	130062	130794	733	130524	243	48.6453	3.02397	46.8817	CSA_5mC_peak_32	PF3D7_0102900		aspartate--tRNA ligase
Pf3D7_01_v3	134255	134556	302	134420	140	12.6145	1.94749	11.5902	CSA_5mC_peak_33	PF3D7_0103100	VPS51	vacuolar protein sorting-associated protein 51, putative
Pf3D7_01_v3	134712	135234	523	135044	197	27.7577	2.4328	26.4287	CSA_5mC_peak_34	PF3D7_0103100	VPS51	vacuolar protein sorting-associated protein 51, putative
Pf3D7_01_v3	135368	136152	785	135861	251	56.658	3.29219	54.6903	CSA_5mC_peak_35	PF3D7_0103100	VPS51	vacuolar protein sorting-associated protein 51, putative
Pf3D7_01_v3	138011	138283	273	138112	132	10.4343	1.84511	9.45967	CSA_5mC_peak_36	PF3D7_0103100	VPS51	vacuolar protein sorting-associated protein 51, putative
Pf3D7_01_v3	138788	139409	622	139203	173	27.4856	2.58724	26.1622	CSA_5mC_peak_37	PF3D7_0103100	VPS51	vacuolar protein sorting-associated protein 51, putative
Pf3D7_01_v3	140975	141357	383	141157	215	38.9729	2.82373	37.4271	CSA_5mC_peak_38	PF3D7_0103200	NT4	nucleoside transporter 4
Pf3D7_01_v3	144096	145140	1045	144839	269	57.0301	3.15488	55.052	CSA_5mC_peak_39	PF3D7_0103300		conserved protein, unknown function
Pf3D7_01_v3	145858	146273	416	146054	177	24.6037	2.40557	23.3351	CSA_5mC_peak_40	PF3D7_0103300		conserved protein, unknown function
Pf3D7_01_v3	147861	148646	786	148093	238	63.1424	3.72129	61.0067	CSA_5mC_peak_41	PF3D7_0103400		zinc-carboxypeptidase, putative
Pf3D7_01_v3	148718	149230	513	149057	174	31.6336	2.80627	30.232	CSA_5mC_peak_42	PF3D7_0103400		zinc-carboxypeptidase, putative
Pf3D7_01_v3	149467	150545	1079	150343	225	45.5933	3.04117	43.904	CSA_5mC_peak_43	PF3D7_0103400		zinc-carboxypeptidase, putative
Pf3D7_01_v3	152418	152719	302	152546	134	15.2795	2.15328	14.1964	CSA_5mC_peak_44	PF3D7_0103400		zinc-carboxypeptidase, putative
Pf3D7_01_v3	157031	157399	369	157230	189	37.6204	2.98576	36.1027	CSA_5mC_peak_45	PF3D7_0103500		conserved Plasmodium protein, unknown function
Pf3D7_01_v3	161354	162786	1433	162236	324	91.5543	3.95923	88.6325	CSA_5mC_peak_46	PF3D7_0103600	PSH1	ATP-dependent DNA/RNA helicase PSH1
Pf3D7_01_v3	163733	164252	520	164168	106	5.62018	1.59365	4.77838	CSA_5mC_peak_47	PF3D7_0103600	PSH1	ATP-dependent DNA/RNA helicase PSH1
Pf3D7_01_v3	164545	165097	553	164826	106	4.1602	1.46577	3.36956	CSA_5mC_peak_48	PF3D7_0103600	PSH1	ATP-dependent DNA/RNA helicase PSH1
Pf3D7_01_v3	166737	167067	331	166936	174	31.5096	2.79937	30.1104	CSA_5mC_peak_49	PF3D7_0103700	PSTK	L-seryl-tRNA(Sec) kinase, putative
Pf3D7_01_v3	174183	174538	356	174355	165	28.0419	2.68643	26.7073	CSA_5mC_peak_50	PF3D7_0103900	PIESP15	parasite-infected erythrocyte surface protein
Pf3D7_01_v3	180880	181189	310	181042	113	5.16278	1.53231	4.33607	CSA_5mC_peak_51	PF3D7_0104100		protein E140, putative
Pf3D7_01_v3	185178	185961	784	185798	253	75.3052	4.11057	72.8422	CSA_5mC_peak_52	intergenic
Pf3D7_01_v3	190628	191296	669	190818	169	29.8185	2.75117	28.4503	CSA_5mC_peak_53	PF3D7_0104300	UBP1	ubiquitin carboxyl-terminal hydrolase 1, putative
Pf3D7_01_v3	191667	192095	429	191945	182	25.8671	2.43687	24.5743	CSA_5mC_peak_54	PF3D7_0104300	UBP1	ubiquitin carboxyl-terminal hydrolase 1, putative
Pf3D7_01_v3	192387	195433	3047	192560	282	82.6985	4.07169	80.0243	CSA_5mC_peak_55	PF3D7_0104300	UBP1	ubiquitin carboxyl-terminal hydrolase 1, putative
Pf3D7_01_v3	195825	196241	417	196008	250	60.6044	3.47163	58.536	CSA_5mC_peak_56	PF3D7_0104300	UBP1	ubiquitin carboxyl-terminal hydrolase 1, putative
Pf3D7_01_v3	198947	199262	316	199094	138	14.4639	2.07518	13.3981	CSA_5mC_peak_57	PF3D7_0104300	UBP1	ubiquitin carboxyl-terminal hydrolase 1, putative
Pf3D7_01_v3	204945	205336	392	205168	158	20.5079	2.31087	19.3182	CSA_5mC_peak_58	PF3D7_0104500		conserved protein, unknown function
Pf3D7_01_v3	206291	206563	273	206413	187	25.1833	2.37102	23.9032	CSA_5mC_peak_59	PF3D7_0104600		conserved Plasmodium protein, unknown function
Pf3D7_01_v3	209131	209570	440	209460	129	10.1549	1.84011	9.18699	CSA_5mC_peak_60	PF3D7_0104600		conserved Plasmodium protein, unknown function
Pf3D7_01_v3	212188	212560	373	212348	209	37.3595	2.7964	35.8468	CSA_5mC_peak_61	PF3D7_0104700	MFR2	major facilitator superfamily-related transporter, putative
Pf3D7_01_v3	217747	218033	287	217902	153	22.9641	2.49223	21.7262	CSA_5mC_peak_62	intergenic
Pf3D7_01_v3	223462	224080	619	223667	183	24.5071	2.36223	23.2401	CSA_5mC_peak_63	PF3D7_0105200		heptatricopeptide repeat and RAP domain-containing protein, putative
Pf3D7_01_v3	228942	229365	424	229195	176	21.1088	2.23229	19.907	CSA_5mC_peak_64	PF3D7_0105500		conserved protein, unknown function
Pf3D7_01_v3	229427	229743	317	229598	105	5.92044	1.62302	5.06921	CSA_5mC_peak_65	PF3D7_0105500		conserved protein, unknown function
Pf3D7_01_v3	230294	230712	419	230489	247	58.9678	3.43013	56.9418	CSA_5mC_peak_66	PF3D7_0105600		FtsJ-like methyltransferase, putative
Pf3D7_01_v3	231043	231339	297	231190	113	7.37177	1.70894	6.47698	CSA_5mC_peak_67	PF3D7_0105600		FtsJ-like methyltransferase, putative
Pf3D7_01_v3	239385	239776	392	239556	179	24.8826	2.40668	23.6086	CSA_5mC_peak_68	PF3D7_0105700		asparagine-rich antigen Pfa35-2
Pf3D7_01_v3	240492	240973	482	240807	208	28.0924	2.3837	26.7571	CSA_5mC_peak_69	PF3D7_0105700		asparagine-rich antigen Pfa35-2
Pf3D7_01_v3	241325	241586	262	241449	161	23.0086	2.43186	21.7699	CSA_5mC_peak_70	PF3D7_0105700		asparagine-rich antigen Pfa35-2
Pf3D7_01_v3	242972	244016	1045	243571	242	60.0701	3.53171	58.0155	CSA_5mC_peak_71	PF3D7_0105700		asparagine-rich antigen Pfa35-2
Pf3D7_01_v3	244323	244825	503	244621	178	26.1304	2.47779	24.8324	CSA_5mC_peak_72	PF3D7_0105700		asparagine-rich antigen Pfa35-2
Pf3D7_01_v3	245439	245977	539	245767	203	32.9923	2.63764	31.5652	CSA_5mC_peak_73	PF3D7_0105700		asparagine-rich antigen Pfa35-2
Pf3D7_01_v3	246541	247461	921	247187	262	56.8408	3.20393	54.8688	CSA_5mC_peak_74	PF3D7_0105700		asparagine-rich antigen Pfa35-2
Pf3D7_01_v3	249700	250411	712	249858	208	38.0505	2.83674	36.5239	CSA_5mC_peak_75	PF3D7_0105800		cyclin-dependent kinases regulatory subunit, putative
Pf3D7_01_v3	254265	254711	447	254493	223	46.4557	3.09819	44.7461	CSA_5mC_peak_76	PF3D7_0105900		3'-5' exonuclease, putative
Pf3D7_01_v3	257376	257809	434	257542	181	26.3768	2.46952	25.074	CSA_5mC_peak_77	PF3D7_0106000		conserved protein, unknown function
Pf3D7_01_v3	261375	261614	240	261470	103	3.35523	1.3979	2.59728	CSA_5mC_peak_78	PF3D7_0106100		V-type proton ATPase subunit C, putative
Pf3D7_01_v3	266296	266836	541	266637	165	20.6632	2.27399	19.4702	CSA_5mC_peak_79	PF3D7_0106300	ATP6	calcium-transporting ATPase
Pf3D7_01_v3	267604	267961	358	267757	161	15.7026	2.02526	14.6108	CSA_5mC_peak_80	PF3D7_0106300	ATP6	calcium-transporting ATPase
Pf3D7_01_v3	268657	269214	558	269045	169	29.8185	2.75117	28.4503	CSA_5mC_peak_81	PF3D7_0106300	ATP6	calcium-transporting ATPase
Pf3D7_01_v3	273280	273519	240	273396	153	22.9641	2.49223	21.7262	CSA_5mC_peak_82	PF3D7_0106400		pre-rRNA-processing protein TSR2, putative
Pf3D7_01_v3	274356	274659	304	274544	143	19.0238	2.32953	17.8642	CSA_5mC_peak_83	PF3D7_0106500		conserved Plasmodium protein, unknown function
Pf3D7_01_v3	276137	276862	726	276384	169	19.029	2.16308	17.8693	CSA_5mC_peak_84	PF3D7_0106500		conserved Plasmodium protein, unknown function
Pf3D7_01_v3	277780	278016	237	277926	128	7.86093	1.6864	6.95216	CSA_5mC_peak_85	PF3D7_0106500		conserved Plasmodium protein, unknown function
Pf3D7_01_v3	279179	279925	747	279514	331	102.673	4.30088	99.4237	CSA_5mC_peak_86	PF3D7_0106600		conserved Plasmodium protein, unknown function
Pf3D7_01_v3	281151	281495	345	281327	184	32.0884	2.74106	30.6784	CSA_5mC_peak_87	PF3D7_0106700	AARP2	small ribosomal subunit assembling AARP2 protein
Pf3D7_01_v3	282258	282719	462	282453	223	46.9593	3.12136	45.2377	CSA_5mC_peak_88	PF3D7_0106700	AARP2	small ribosomal subunit assembling AARP2 protein
Pf3D7_01_v3	282772	284429	1658	283290	222	51.17	3.32924	49.3437	CSA_5mC_peak_89	PF3D7_0106700	AARP2	small ribosomal subunit assembling AARP2 protein
Pf3D7_01_v3	285049	285458	410	285227	213	44.3452	3.09188	42.6849	CSA_5mC_peak_90	PF3D7_0106700	AARP2	small ribosomal subunit assembling AARP2 protein
Pf3D7_01_v3	290507	290977	471	290807	181	28.2733	2.56691	26.9348	CSA_5mC_peak_91	PF3D7_0106900	IspD	2-C-methyl-D-erythritol 4-phosphate cytidylyltransferase, putative
Pf3D7_01_v3	291313	292317	1005	291517	307	84.0795	3.8505	81.3686	CSA_5mC_peak_92	PF3D7_0106900	IspD	2-C-methyl-D-erythritol 4-phosphate cytidylyltransferase, putative
Pf3D7_01_v3	295811	296066	256	295955	151	15.7795	2.08109	14.6853	CSA_5mC_peak_93	PF3D7_0107100		conserved protein, unknown function
Pf3D7_01_v3	299570	299893	324	299773	144	19.4172	2.34658	18.2492	CSA_5mC_peak_94	PF3D7_0107300		conserved Plasmodium protein, unknown function
Pf3D7_01_v3	300569	301005	437	300759	114	6.31482	1.62195	5.45122	CSA_5mC_peak_95	PF3D7_0107300		conserved Plasmodium protein, unknown function
Pf3D7_01_v3	303589	303824	236	303714	113	7.37177	1.70894	6.47698	CSA_5mC_peak_96	PF3D7_0107400	ATPk	ATP synthase-associated protein, putative
Pf3D7_01_v3	306502	307211	710	306807	251	57.4745	3.32682	55.4855	CSA_5mC_peak_97	PF3D7_0107500	NCR1	Niemann-Pick type C1-related protein
Pf3D7_01_v3	308032	308882	851	308560	254	56.1635	3.24462	54.2078	CSA_5mC_peak_98	PF3D7_0107500	NCR1	Niemann-Pick type C1-related protein
Pf3D7_01_v3	314582	315431	850	314782	235	54.0061	3.32852	52.1064	CSA_5mC_peak_99	PF3D7_0107600	eIK2	eukaryotic translation initiation factor 2-alpha kinase 2, putative
Pf3D7_01_v3	315900	316778	879	316044	161	18.5965	2.18464	17.4456	CSA_5mC_peak_100	PF3D7_0107600	eIK2	eukaryotic translation initiation factor 2-alpha kinase 2, putative
Pf3D7_01_v3	318852	319080	229	318976	109	6.67555	1.67004	5.80137	CSA_5mC_peak_101	PF3D7_0107600	eIK2	eukaryotic translation initiation factor 2-alpha kinase 2, putative
Pf3D7_01_v3	322428	322689	262	322556	134	15.757	2.18475	14.6632	CSA_5mC_peak_102	PF3D7_0107800	MRE11	double-strand break repair protein MRE11
Pf3D7_01_v3	323149	323481	333	323291	164	16.3303	2.0449	15.2254	CSA_5mC_peak_103	PF3D7_0107800	MRE11	double-strand break repair protein MRE11
Pf3D7_01_v3	323912	324267	356	324102	123	6.31558	1.59194	5.45184	CSA_5mC_peak_104	PF3D7_0107800	MRE11	double-strand break repair protein MRE11
Pf3D7_01_v3	326047	326322	276	326204	132	14.85	2.13823	13.7753	CSA_5mC_peak_105	PF3D7_0107800	MRE11	double-strand break repair protein MRE11
Pf3D7_01_v3	327128	327356	229	327253	114	8.48516	1.79058	7.5594	CSA_5mC_peak_106	PF3D7_0107900		conserved Plasmodium protein, unknown function
Pf3D7_01_v3	337841	338787	947	338498	287	89.8075	4.31731	86.9365	CSA_5mC_peak_107	PF3D7_0108300	ARP	conserved Plasmodium protein, unknown function
Pf3D7_01_v3	340814	341350	537	341003	170	20.4798	2.23398	19.2905	CSA_5mC_peak_108	PF3D7_0108300	ARP	conserved Plasmodium protein, unknown function
Pf3D7_01_v3	341477	342148	672	341675	158	18.3137	2.18647	17.168	CSA_5mC_peak_109	PF3D7_0108300	ARP	conserved Plasmodium protein, unknown function
Pf3D7_01_v3	349162	349790	629	349492	188	38.7949	3.05865	37.2527	CSA_5mC_peak_110	PF3D7_0108500		ELM2 domain-containing protein, putative
Pf3D7_01_v3	350865	351103	239	350938	114	9.40724	1.86108	8.45743	CSA_5mC_peak_111	PF3D7_0108600		DnaJ domain-containing protein, putative
Pf3D7_01_v3	353234	353626	393	353431	114	5.59257	1.56427	4.75215	CSA_5mC_peak_112	PF3D7_0108700	PSOP24	secreted ookinete protein, putative
Pf3D7_01_v3	354879	356175	1297	355423	241	52.9063	3.22252	51.0358	CSA_5mC_peak_113	PF3D7_0108700	PSOP24	secreted ookinete protein, putative
Pf3D7_01_v3	361412	361923	512	361703	145	19.7998	2.36277	18.624	CSA_5mC_peak_114	intergenic
Pf3D7_01_v3	364694	364962	269	364836	161	21.6403	2.35447	20.4284	CSA_5mC_peak_115	PF3D7_0109000	PHIL1	photosensitized INA-labeled protein PHIL1
Pf3D7_01_v3	369770	370050	281	369871	132	11.127	1.89111	10.1365	CSA_5mC_peak_116	PF3D7_0109200	CFIM25	cleavage and polyadenylation specificity factor subunit 5, putative
Pf3D7_01_v3	376440	376713	274	376616	109	8.04022	1.78017	7.12629	CSA_5mC_peak_117	PF3D7_0109500		N-acetyltransferase, GNAT family, putative
Pf3D7_01_v3	378962	379566	605	379348	269	75.7051	3.92412	73.2327	CSA_5mC_peak_118	PF3D7_0109700	RRP36	rRNA biogenesis protein RRP36, putative
Pf3D7_01_v3	380688	381078	391	380838	176	23.5374	2.35697	22.2888	CSA_5mC_peak_119	PF3D7_0109800	cPheRS	phenylalanine--tRNA ligase alpha subunit
Pf3D7_01_v3	388410	388795	386	388585	154	16.7964	2.12331	15.6818	CSA_5mC_peak_120	PF3D7_0110000		conserved Plasmodium protein, unknown function
Pf3D7_01_v3	390076	390325	250	390212	168	29.1772	2.72398	27.8217	CSA_5mC_peak_121	PF3D7_0110100	SELB	selenocysteine-specific elongation factor, putative
Pf3D7_01_v3	393892	394250	359	394094	208	47.6477	3.30628	45.9088	CSA_5mC_peak_122	PF3D7_0110400	RPB9	DNA-directed RNA polymerase II subunit RPB9, putative
Pf3D7_01_v3	395144	395390	247	395291	142	18.6609	2.31422	17.5081	CSA_5mC_peak_123	PF3D7_0110400	RPB9	DNA-directed RNA polymerase II subunit RPB9, putative
Pf3D7_01_v3	396616	397531	916	396903	255	68.2947	3.75883	66.0222	CSA_5mC_peak_124	PF3D7_0110500	BDP3	bromodomain protein 3, putative
Pf3D7_01_v3	397764	398691	928	398293	259	61.7125	3.43028	59.6144	CSA_5mC_peak_125	PF3D7_0110500	BDP3	bromodomain protein 3, putative
Pf3D7_01_v3	399155	399549	395	399327	241	53.6846	3.25647	51.7931	CSA_5mC_peak_126	PF3D7_0110500	BDP3	bromodomain protein 3, putative
Pf3D7_01_v3	401326	401838	513	401639	164	13.0293	1.86698	11.9941	CSA_5mC_peak_127	PF3D7_0110500	BDP3	bromodomain protein 3, putative
Pf3D7_01_v3	402098	402659	562	402455	136	13.966	2.0551	12.9103	CSA_5mC_peak_128	PF3D7_0110500	BDP3	bromodomain protein 3, putative
Pf3D7_01_v3	406476	407152	677	406809	119	10.8658	1.942	9.88094	CSA_5mC_peak_129	PF3D7_0110600	PIP5K	phosphatidylinositol-4-phosphate 5-kinase
Pf3D7_01_v3	407755	408062	308	407948	104	6.48492	1.6752	5.61669	CSA_5mC_peak_130	PF3D7_0110600	PIP5K	phosphatidylinositol-4-phosphate 5-kinase
Pf3D7_01_v3	408103	408787	685	408387	230	59.7502	3.65431	57.7034	CSA_5mC_peak_131	PF3D7_0110600	PIP5K	phosphatidylinositol-4-phosphate 5-kinase
Pf3D7_01_v3	412345	412601	257	412509	120	11.1682	1.95818	10.1761	CSA_5mC_peak_132	PF3D7_0110600	PIP5K	phosphatidylinositol-4-phosphate 5-kinase
Pf3D7_01_v3	413574	413811	238	413689	120	11.1682	1.95818	10.1761	CSA_5mC_peak_133	PF3D7_0110700	CAF1C	chromatin assembly factor 1 subunit C, putative
Pf3D7_01_v3	414816	415130	315	414993	149	19.5339	2.31657	18.3637	CSA_5mC_peak_134	PF3D7_0110700	CAF1C	chromatin assembly factor 1 subunit C, putative
Pf3D7_01_v3	418347	418701	355	418513	192	40.7923	3.12338	39.2087	CSA_5mC_peak_135	PF3D7_0110800		transcription initiation factor TFIIB, putative
Pf3D7_01_v3	422393	422797	405	422627	224	50.3588	3.2701	48.552	CSA_5mC_peak_136	PF3D7_0111000		kinesin-8B, putative
Pf3D7_01_v3	423922	424237	316	424133	148	14.2192	2.00502	13.1579	CSA_5mC_peak_137	PF3D7_0111000		kinesin-8B, putative
Pf3D7_01_v3	424456	425395	940	424777	160	15.0721	1.99532	13.9932	CSA_5mC_peak_138	PF3D7_0111000		kinesin-8B, putative
Pf3D7_01_v3	425512	425880	369	425710	176	23.5374	2.35697	22.2888	CSA_5mC_peak_139	PF3D7_0111000		kinesin-8B, putative
Pf3D7_01_v3	427144	427569	426	427344	184	29.5385	2.60922	28.1758	CSA_5mC_peak_140	PF3D7_0111000		kinesin-8B, putative
Pf3D7_01_v3	431671	432041	371	431823	138	15.2967	2.12831	14.2134	CSA_5mC_peak_141	PF3D7_0111300		P-loop containing nucleoside triphosphate hydrolase, putative
Pf3D7_01_v3	433995	434600	606	434314	301	81.4156	3.80877	78.7772	CSA_5mC_peak_142	PF3D7_0111300		P-loop containing nucleoside triphosphate hydrolase, putative
Pf3D7_01_v3	436451	436924	474	436616	139	11.217	1.86427	10.2233	CSA_5mC_peak_143	PF3D7_0111300		P-loop containing nucleoside triphosphate hydrolase, putative
Pf3D7_01_v3	437244	437858	615	437492	247	51.2575	3.1004	49.4284	CSA_5mC_peak_144	PF3D7_0111400	GEXP19	conserved Plasmodium protein, unknown function
Pf3D7_01_v3	439790	440463	674	440308	185	29.9649	2.62333	28.5942	CSA_5mC_peak_145	PF3D7_0111500		UMP-CMP kinase, putative
Pf3D7_01_v3	440661	441050	390	440906	154	22.6942	2.4679	21.4618	CSA_5mC_peak_146	PF3D7_0111500		UMP-CMP kinase, putative
Pf3D7_01_v3	446006	446797	792	446309	358	117.097	4.52765	113.319	CSA_5mC_peak_147	PF3D7_0111800		eukaryotic translation initiation factor 4E, putative
Pf3D7_01_v3	448210	448487	278	448358	173	22.2095	2.3068	20.9862	CSA_5mC_peak_148	PF3D7_0111800		eukaryotic translation initiation factor 4E, putative
Pf3D7_01_v3	452881	453137	257	453034	158	14.7673	1.98776	13.695	CSA_5mC_peak_149	PF3D7_0112000	TatD	TatD-like deoxyribonuclease
Pf3D7_01_v3	477506	477735	230	477615	114	7.3888	1.70605	6.49367	CSA_5mC_peak_150	intergenic
Pf3D7_01_v3	487593	489729	2137	488691	366	119.128	4.50928	115.284	CSA_5mC_peak_151	PF3D7_0112900		Plasmodium exported protein, unknown function
Pf3D7_01_v3	493375	493824	450	493608	292	90.282	4.27263	87.3984	CSA_5mC_peak_152	intergenic
Pf3D7_01_v3	495151	495726	576	495297	169	29.8185	2.75117	28.4503	CSA_5mC_peak_153	PF3D7_0113100	SURF1.1	surface-associated interspersed protein 1.1 (SURFIN 1.1)
Pf3D7_01_v3	496345	500356	4012	497229	270	65.4319	3.47915	63.2351	CSA_5mC_peak_154	PF3D7_0113100	SURF1.1	surface-associated interspersed protein 1.1 (SURFIN 1.1)
Pf3D7_01_v3	501349	502408	1060	502187	233	46.2808	3.00414	44.5753	CSA_5mC_peak_155	PF3D7_0113200		Plasmodium exported protein, unknown function
Pf3D7_01_v3	502766	503171	406	502955	175	32.5591	2.84827	31.1397	CSA_5mC_peak_156	PF3D7_0113200		Plasmodium exported protein, unknown function
Pf3D7_01_v3	508593	509133	541	508908	277	47.5998	2.75356	45.8626	CSA_5mC_peak_157	PF3D7_0113400		Plasmodium exported protein, unknown function
Pf3D7_01_v3	512363	513679	1317	513453	236	49.0298	3.09826	47.2566	CSA_5mC_peak_158	intergenic
Pf3D7_01_v3	513902	514277	376	514092	210	40.7333	2.94676	39.1513	CSA_5mC_peak_159	intergenic
Pf3D7_01_v3	514773	517842	3070	516585	267	66.3389	3.54551	64.1176	CSA_5mC_peak_160	intergenic
Pf3D7_01_v3	518123	518405	283	518271	192	29.9364	2.57003	28.5663	CSA_5mC_peak_161	intergenic
Pf3D7_01_v3	520107	520591	485	520445	216	45.5742	3.12211	43.8853	CSA_5mC_peak_162	PF3D7_0113700	HSP40	heat shock protein 40, type II
Pf3D7_01_v3	521358	521639	282	521469	101	2.1375	1.27517	1.43676	CSA_5mC_peak_163	PF3D7_0113700	HSP40	heat shock protein 40, type II
Pf3D7_01_v3	521703	522562	860	521961	215	40.7111	2.90333	39.1297	CSA_5mC_peak_164	PF3D7_0113700	HSP40	heat shock protein 40, type II
Pf3D7_01_v3	527478	528307	830	527726	186	25.2287	2.37939	23.9479	CSA_5mC_peak_165	PF3D7_0113800		DBL containing protein, unknown function
Pf3D7_01_v3	529027	530161	1135	529506	232	49.6622	3.16153	47.8736	CSA_5mC_peak_166	PF3D7_0113800		DBL containing protein, unknown function
Pf3D7_01_v3	530462	531049	588	530710	237	42.2592	2.80387	40.6449	CSA_5mC_peak_167	PF3D7_0113800		DBL containing protein, unknown function
Pf3D7_01_v3	531997	534236	2240	533188	246	57.3037	3.36708	55.3198	CSA_5mC_peak_168	PF3D7_0113800		DBL containing protein, unknown function
Pf3D7_01_v3	534905	536479	1575	535326	276	69.548	3.58838	67.2409	CSA_5mC_peak_169	PF3D7_0113800		DBL containing protein, unknown function
Pf3D7_01_v3	537975	538346	372	538166	237	64.6611	3.80714	62.4846	CSA_5mC_peak_170	PF3D7_0113900	CBP1	CX3CL1-binding protein 1
Pf3D7_01_v3	538525	538795	271	538623	153	22.7974	2.48221	21.5629	CSA_5mC_peak_171	intergenic
Pf3D7_01_v3	542856	546535	3680	543357	317	109.75	4.76703	106.257	CSA_5mC_peak_172	PF3D7_0114000	EPF1	exported protein family 1
Pf3D7_01_v3	550856	551517	662	551327	251	74.0639	4.0782	71.6324	CSA_5mC_peak_173	PF3D7_0114200	EPF3	exported protein family 3
Pf3D7_01_v3	553002	553579	578	553286	253	64.6437	3.61806	62.4678	CSA_5mC_peak_174	intergenic
Pf3D7_01_v3	554342	554632	291	554465	151	18.3446	2.23181	17.1982	CSA_5mC_peak_175	intergenic
Pf3D7_01_v3	561026	561334	309	561165	151	16.4932	2.12286	15.3844	CSA_5mC_peak_176	intergenic
Pf3D7_01_v3	563931	564555	625	564318	223	53.755	3.44331	51.8623	CSA_5mC_peak_177	PF3D7_0114700	RIF	rifin
Pf3D7_01_v3	579109	580597	1489	579900	210	50.2125	3.41468	48.4092	CSA_5mC_peak_178	PF3D7_0115000	SURF1.3	surface-associated interspersed protein 1.3 (SURFIN 1.3)
Pf3D7_01_v3	581031	581433	403	581191	207	48.5949	3.36613	46.8327	CSA_5mC_peak_179	PF3D7_0115000	SURF1.3	surface-associated interspersed protein 1.3 (SURFIN 1.3)
Pf3D7_01_v3	581928	582372	445	582146	195	42.3138	3.17193	40.6979	CSA_5mC_peak_180	PF3D7_0115000	SURF1.3	surface-associated interspersed protein 1.3 (SURFIN 1.3)
Pf3D7_01_v3	582550	582864	315	582699	162	26.7365	2.63788	25.4268	CSA_5mC_peak_181	PF3D7_0115000	SURF1.3	surface-associated interspersed protein 1.3 (SURFIN 1.3)
Pf3D7_01_v3	595409	595922	514	595650	318	117.76	5.10285	113.961	CSA_5mC_peak_182	PF3D7_0115300	RIF	rifin
Pf3D7_01_v3	598701	599230	530	598863	135	11.1926	1.88104	10.1997	CSA_5mC_peak_183	PF3D7_0115400		stevor
Pf3D7_01_v3	605141	605370	230	605307	119	6.82936	1.64385	5.95034	CSA_5mC_peak_184	PF3D7_0115600	RIF	rifin
Pf3D7_01_v3	607214	607543	330	607399	131	14.7194	2.1362	13.6483	CSA_5mC_peak_185	PF3D7_0115700	VAR	erythrocyte membrane protein 1, PfEMP1
Pf3D7_01_v3	608675	610728	2054	609127	199	44.3733	3.23667	42.7116	CSA_5mC_peak_186	PF3D7_0115700	VAR	erythrocyte membrane protein 1, PfEMP1
Pf3D7_01_v3	610831	615037	4207	612344	230	54.1068	3.38426	52.204	CSA_5mC_peak_187	PF3D7_0115700	VAR	erythrocyte membrane protein 1, PfEMP1
Pf3D7_01_v3	620591	620881	291	620740	129	14.0438	2.10383	12.9867	CSA_5mC_peak_188	intergenic
Pf3D7_01_v3	625236	625505	270	625358	134	15.757	2.18475	14.6632	CSA_5mC_peak_189	intergenic
Pf3D7_01_v3	627358	628165	808	627995	163	19.9145	2.24539	18.7365	CSA_5mC_peak_190	intergenic
Pf3D7_01_v3	628485	628739	255	628577	122	7.02871	1.64808	6.14373	CSA_5mC_peak_191	intergenic
Pf3D7_01_v3	629892	630325	434	630140	147	16.1119	2.12364	15.0108	CSA_5mC_peak_192	intergenic
Pf3D7_01_v3	630892	631254	363	630978	114	6.51937	1.6381	5.65012	CSA_5mC_peak_193	intergenic
Pf3D7_01_v3	632132	632361	230	632269	110	5.08933	1.53526	4.26569	CSA_5mC_peak_194	intergenic
Pf3D7_01_v3	633800	634040	241	633897	143	14.2792	2.03506	13.2169	CSA_5mC_peak_195	intergenic
Pf3D7_01_v3	639304	639572	269	639429	121	3.8335	1.40262	3.05568	CSA_5mC_peak_196	intergenic
Pf3D7_01_v3	639790	640703	914	640234	239	66.7619	3.884	64.5292	CSA_5mC_peak_197	intergenic
Pf3D7_02_v3	1010	6324	5315	1794	313	80.7479	3.669	78.1305	CSA_5mC_peak_198	intergenic
Pf3D7_02_v3	6745	7296	552	7203	109	5.56423	1.57838	4.72481	CSA_5mC_peak_199	intergenic
Pf3D7_02_v3	9756	12336	2581	11327	244	54.9295	3.28276	53.0058	CSA_5mC_peak_200	intergenic
Pf3D7_02_v3	13831	14250	420	13982	130	9.29783	1.77751	8.35101	CSA_5mC_peak_201	intergenic
Pf3D7_02_v3	14861	15125	265	14976	128	4.88465	1.47128	4.06807	CSA_5mC_peak_202	intergenic
Pf3D7_02_v3	16556	17114	559	16784	165	17.2666	2.09032	16.1424	CSA_5mC_peak_203	intergenic
Pf3D7_02_v3	23262	23793	532	23590	137	12.9699	1.98549	11.9364	CSA_5mC_peak_204	intergenic
Pf3D7_02_v3	25677	27865	2189	25896	244	64.4384	3.71066	62.2675	CSA_5mC_peak_205	PF3D7_0200100	VAR	erythrocyte membrane protein 1, PfEMP1
Pf3D7_02_v3	27981	28731	751	28473	190	35.6271	2.872	34.1488	CSA_5mC_peak_206	PF3D7_0200100	VAR	erythrocyte membrane protein 1, PfEMP1
Pf3D7_02_v3	29253	29745	493	29455	232	62.6213	3.77072	60.4988	CSA_5mC_peak_207	PF3D7_0200100	VAR	erythrocyte membrane protein 1, PfEMP1
Pf3D7_02_v3	30522	30782	261	30681	129	9.97304	1.82774	9.01002	CSA_5mC_peak_208	PF3D7_0200100	VAR	erythrocyte membrane protein 1, PfEMP1
Pf3D7_02_v3	33187	33705	519	33505	180	25.3753	2.42522	24.0917	CSA_5mC_peak_209	PF3D7_0200200	RIF	rifin
Pf3D7_02_v3	38674	39039	366	38869	147	14.835	2.04702	13.7606	CSA_5mC_peak_210	PF3D7_0200400		stevor
Pf3D7_02_v3	42040	42275	236	42147	118	7.69708	1.71301	6.79335	CSA_5mC_peak_211	PF3D7_0200500	RIF	rifin
Pf3D7_02_v3	45821	46123	303	45972	126	9.11042	1.78157	8.16865	CSA_5mC_peak_212	PF3D7_0200600	RIF	rifin
Pf3D7_02_v3	54636	55036	401	54848	187	30.0807	2.61391	28.7081	CSA_5mC_peak_213	intergenic
Pf3D7_02_v3	57726	58075	350	57914	156	21.6242	2.38939	20.4127	CSA_5mC_peak_214	PF3D7_0201000	RIF	rifin
Pf3D7_02_v3	63564	63967	404	63740	177	23.9111	2.36984	22.6555	CSA_5mC_peak_215	PF3D7_0201200	RIF	rifin
Pf3D7_02_v3	66765	67090	326	66913	147	12.6662	1.91726	11.6399	CSA_5mC_peak_216	PF3D7_0201300		stevor
Pf3D7_02_v3	69711	69951	241	69845	163	19.9364	2.24659	18.7578	CSA_5mC_peak_217	PF3D7_0201400		Plasmodium exported protein (hyp10), unknown function
Pf3D7_02_v3	73453	73919	467	73656	240	61.5819	3.62384	59.4876	CSA_5mC_peak_218	PF3D7_0201500		Plasmodium exported protein (hyp9), unknown function
Pf3D7_02_v3	77175	77872	698	77610	253	61.4822	3.47948	59.3902	CSA_5mC_peak_219	PF3D7_0201600	RLP1	PHISTb domain-containing RESA-like protein 1
Pf3D7_02_v3	81172	81921	750	81376	193	27.9778	2.46846	26.6451	CSA_5mC_peak_220	PF3D7_0201700		DnaJ protein, putative
Pf3D7_02_v3	82541	83079	539	82766	204	29.6357	2.47627	28.2714	CSA_5mC_peak_221	PF3D7_0201700		DnaJ protein, putative
Pf3D7_02_v3	87819	88225	407	88043	152	22.5587	2.47605	21.3285	CSA_5mC_peak_222	PF3D7_0201800	KAHsp40	knob associated heat shock protein 40
Pf3D7_02_v3	91325	91556	232	91455	111	8.57581	1.81253	7.6472	CSA_5mC_peak_223	PF3D7_0201900	EMP3	erythrocyte membrane protein 3
Pf3D7_02_v3	93644	94302	659	93744	116	9.97988	1.89345	9.01603	CSA_5mC_peak_224	PF3D7_0201900	EMP3	erythrocyte membrane protein 3
Pf3D7_02_v3	94674	95358	685	94934	190	39.7891	3.09102	38.2262	CSA_5mC_peak_225	PF3D7_0201900	EMP3	erythrocyte membrane protein 3
Pf3D7_02_v3	96903	98492	1590	98125	321	97.3225	4.20945	94.2303	CSA_5mC_peak_226	PF3D7_0201900	EMP3	erythrocyte membrane protein 3
Pf3D7_02_v3	103735	104437	703	104073	337	129.435	5.31152	125.25	CSA_5mC_peak_227	PF3D7_0202000	KAHRP	knob-associated histidine-rich protein
Pf3D7_02_v3	104575	104834	260	104642	99	4.27383	1.49649	3.4793	CSA_5mC_peak_228	PF3D7_0202000	KAHRP	knob-associated histidine-rich protein
Pf3D7_02_v3	104884	105442	559	105091	208	49.1321	3.38232	47.3565	CSA_5mC_peak_229	PF3D7_0202000	KAHRP	knob-associated histidine-rich protein
Pf3D7_02_v3	120620	123091	2472	121387	350	114.837	4.5383	111.138	CSA_5mC_peak_230	PF3D7_0202400	PTEF	translation-enhancing factor
Pf3D7_02_v3	130123	132272	2150	131924	241	57.2194	3.41315	55.2371	CSA_5mC_peak_231	PF3D7_0202600		nucleic acid-binding protein, putative
Pf3D7_02_v3	132321	132612	292	132450	126	6.97396	1.63045	6.09105	CSA_5mC_peak_232	PF3D7_0202600		nucleic acid-binding protein, putative
Pf3D7_02_v3	133238	133615	378	133425	212	37.0549	2.7593	35.5486	CSA_5mC_peak_233	PF3D7_0202600		nucleic acid-binding protein, putative
Pf3D7_02_v3	141174	141411	238	141333	151	17.6198	2.18905	16.4882	CSA_5mC_peak_234	PF3D7_0202800		conserved Plasmodium protein, unknown function
Pf3D7_02_v3	142721	145771	3051	143818	270	67.2906	3.55521	65.0454	CSA_5mC_peak_235	PF3D7_0203000	ROPE	repetitive organellar protein, putative
Pf3D7_02_v3	145928	147174	1247	146629	283	60.7789	3.18825	58.7061	CSA_5mC_peak_236	PF3D7_0203000	ROPE	repetitive organellar protein, putative
Pf3D7_02_v3	147289	147606	318	147442	179	27.7941	2.55708	26.4647	CSA_5mC_peak_237	PF3D7_0203000	ROPE	repetitive organellar protein, putative
Pf3D7_02_v3	150624	151372	749	151049	250	58.4386	3.37758	56.426	CSA_5mC_peak_238	PF3D7_0203100		protein kinase, putative
Pf3D7_02_v3	151688	152547	860	151949	244	61.8123	3.58936	59.712	CSA_5mC_peak_239	PF3D7_0203100		protein kinase, putative
Pf3D7_02_v3	153402	154732	1331	153748	236	55.6431	3.39294	53.7009	CSA_5mC_peak_240	PF3D7_0203100		protein kinase, putative
Pf3D7_02_v3	155657	155899	243	155733	128	7.35529	1.65091	6.46098	CSA_5mC_peak_241	PF3D7_0203100		protein kinase, putative
Pf3D7_02_v3	156257	157017	761	156685	265	59.7911	3.29662	57.743	CSA_5mC_peak_242	PF3D7_0203100		protein kinase, putative
Pf3D7_02_v3	158905	159556	652	158961	139	8.72523	1.70551	7.79297	CSA_5mC_peak_243	PF3D7_0203200		conserved Plasmodium protein, unknown function
Pf3D7_02_v3	165556	166010	455	165837	150	21.7561	2.44368	20.5415	CSA_5mC_peak_244	PF3D7_0203600		conserved Plasmodium protein, unknown function
Pf3D7_02_v3	166165	166505	341	166322	171	22.4841	2.33384	21.2559	CSA_5mC_peak_245	PF3D7_0203600		conserved Plasmodium protein, unknown function
Pf3D7_02_v3	166697	167039	343	166880	147	13.98	1.99584	12.9242	CSA_5mC_peak_246	PF3D7_0203600		conserved Plasmodium protein, unknown function
Pf3D7_02_v3	168741	169317	577	169045	246	70.9907	3.99728	68.6433	CSA_5mC_peak_247	PF3D7_0203700	MAK16	protein MAK16, putative
Pf3D7_02_v3	169405	170114	710	169687	234	52.7632	3.28206	50.8953	CSA_5mC_peak_248	PF3D7_0203700	MAK16	protein MAK16, putative
Pf3D7_02_v3	175489	175748	260	175632	137	16.8229	2.2333	15.7074	CSA_5mC_peak_249	intergenic
Pf3D7_02_v3	181248	181613	366	181434	166	26.5688	2.5938	25.2626	CSA_5mC_peak_250	PF3D7_0204000	CAPH2	condensin-2 complex subunit H2, putative
Pf3D7_02_v3	182984	183530	547	183194	206	39.4352	2.91951	37.88	CSA_5mC_peak_251	PF3D7_0204100		Sel1 repeat-containing protein, putative
Pf3D7_02_v3	183980	184333	354	184159	174	20.0238	2.18778	18.8438	CSA_5mC_peak_252	PF3D7_0204100		Sel1 repeat-containing protein, putative
Pf3D7_02_v3	184603	185052	450	184880	199	32.9181	2.66324	31.4922	CSA_5mC_peak_253	PF3D7_0204100		Sel1 repeat-containing protein, putative
Pf3D7_02_v3	185332	185887	556	185529	222	53.6081	3.44736	51.7186	CSA_5mC_peak_254	PF3D7_0204100		Sel1 repeat-containing protein, putative
Pf3D7_02_v3	187227	187733	507	187516	192	38.9387	3.02533	37.3939	CSA_5mC_peak_255	PF3D7_0204100		Sel1 repeat-containing protein, putative
Pf3D7_02_v3	188569	189272	704	188855	239	55.4058	3.35189	53.4691	CSA_5mC_peak_256	PF3D7_0204100		Sel1 repeat-containing protein, putative
Pf3D7_02_v3	192161	192494	334	192334	209	49.6713	3.3985	47.8819	CSA_5mC_peak_257	intergenic
Pf3D7_02_v3	194974	196277	1304	195549	262	69.461	3.7311	67.1575	CSA_5mC_peak_258	PF3D7_0204300		conserved Plasmodium protein, unknown function
Pf3D7_02_v3	201342	201605	264	201478	140	9.67734	1.76273	8.72131	CSA_5mC_peak_259	PF3D7_0204600		5'-3' exonuclease, putative
Pf3D7_02_v3	202782	203265	484	203162	145	18.1356	2.25967	16.9939	CSA_5mC_peak_260	PF3D7_0204600		5'-3' exonuclease, putative
Pf3D7_02_v3	203597	203964	368	203753	165	15.3657	1.98839	14.2812	CSA_5mC_peak_261	PF3D7_0204600		5'-3' exonuclease, putative
Pf3D7_02_v3	206780	207451	672	207120	181	29.778	2.64515	28.4112	CSA_5mC_peak_262	PF3D7_0204700	HT1	hexose transporter
Pf3D7_02_v3	209813	210145	333	210062	110	6.02785	1.61325	5.17369	CSA_5mC_peak_263	PF3D7_0204800		3'-5' exonuclease, putative
Pf3D7_02_v3	210463	210887	425	210674	202	34.7628	2.72859	33.3012	CSA_5mC_peak_264	PF3D7_0204800		3'-5' exonuclease, putative
Pf3D7_02_v3	212030	212398	369	212193	177	20.3257	2.18706	19.1395	CSA_5mC_peak_265	PF3D7_0204900	COQ5	2-methoxy-6-polyprenyl-1,4-benzoquinol methylase, mitochondrial, putative
Pf3D7_02_v3	213005	213839	835	213287	281	93.3757	4.5637	90.3991	CSA_5mC_peak_266	PF3D7_0205000		conserved Plasmodium protein, unknown function
Pf3D7_02_v3	213882	214347	466	214138	166	21.0305	2.28769	19.8301	CSA_5mC_peak_267	PF3D7_0205000		conserved Plasmodium protein, unknown function
Pf3D7_02_v3	214789	216011	1223	215279	283	76.0553	3.7818	73.5726	CSA_5mC_peak_268	PF3D7_0205100		conserved Plasmodium protein, unknown function
Pf3D7_02_v3	218327	218844	518	218712	144	19.4172	2.34658	18.2492	CSA_5mC_peak_269	PF3D7_0205200		MORN repeat protein, putative
Pf3D7_02_v3	219734	219967	234	219841	122	5.73515	1.55126	4.88992	CSA_5mC_peak_270	PF3D7_0205300		conserved Plasmodium protein, unknown function
Pf3D7_02_v3	220137	220379	243	220248	111	4.29031	1.46416	3.49529	CSA_5mC_peak_271	PF3D7_0205300		conserved Plasmodium protein, unknown function
Pf3D7_02_v3	220454	220873	420	220652	141	15.4611	2.11997	14.3734	CSA_5mC_peak_272	PF3D7_0205300		conserved Plasmodium protein, unknown function
Pf3D7_02_v3	221082	221319	238	221236	126	13.055	2.05528	12.0188	CSA_5mC_peak_273	PF3D7_0205300		conserved Plasmodium protein, unknown function
Pf3D7_02_v3	223299	223695	397	223453	178	29.5123	2.6555	28.1503	CSA_5mC_peak_274	PF3D7_0205400		PCI domain-containing protein, putative
Pf3D7_02_v3	229642	229980	339	229790	186	34.0359	2.8254	32.5883	CSA_5mC_peak_275	PF3D7_0205600		conserved Plasmodium protein, unknown function
Pf3D7_02_v3	235499	235873	375	235680	184	21.6556	2.21597	20.4435	CSA_5mC_peak_276	PF3D7_0205900	RPN1	26S proteasome regulatory subunit RPN1, putative
Pf3D7_02_v3	240098	241470	1373	240743	200	32.5187	2.63689	31.1003	CSA_5mC_peak_277	PF3D7_0206000	RAD2	DNA repair protein RAD2, putative
Pf3D7_02_v3	241528	241756	229	241601	105	4.18289	1.47054	3.39154	CSA_5mC_peak_278	PF3D7_0206000	RAD2	DNA repair protein RAD2, putative
Pf3D7_02_v3	242127	243473	1347	242856	202	28.3877	2.43158	27.047	CSA_5mC_peak_279	PF3D7_0206000	RAD2	DNA repair protein RAD2, putative
Pf3D7_02_v3	248068	248491	424	248147	114	9.40724	1.86108	8.45743	CSA_5mC_peak_280	PF3D7_0206100	SufE	cysteine desulfuration protein SufE
Pf3D7_02_v3	249508	249851	344	249676	168	18.3283	2.1314	17.1823	CSA_5mC_peak_281	PF3D7_0206200	PAT	pantothenate transporter
Pf3D7_02_v3	252835	253185	351	252980	141	13.2681	1.9832	12.228	CSA_5mC_peak_282	intergenic
Pf3D7_02_v3	254417	255051	635	254622	168	26.847	2.59277	25.5352	CSA_5mC_peak_283	intergenic
Pf3D7_02_v3	255423	256266	844	255599	206	37.7805	2.84032	36.2599	CSA_5mC_peak_284	intergenic
Pf3D7_02_v3	256945	257193	249	257139	102	4.05603	1.46717	3.26976	CSA_5mC_peak_285	intergenic
Pf3D7_02_v3	257318	257734	417	257541	205	37.32	2.8266	35.8087	CSA_5mC_peak_286	intergenic
Pf3D7_02_v3	259063	260331	1269	259718	267	73.5783	3.85433	71.1603	CSA_5mC_peak_287	intergenic
Pf3D7_02_v3	261249	261820	572	261408	194	36.698	2.89059	35.1991	CSA_5mC_peak_288	intergenic
Pf3D7_02_v3	264030	264730	701	264561	181	28.7668	2.59247	27.4189	CSA_5mC_peak_289	PF3D7_0206500		conserved Plasmodium protein, unknown function
Pf3D7_02_v3	271707	271983	277	271852	175	21.1376	2.23943	19.9353	CSA_5mC_peak_290	PF3D7_0206700	ADSL	adenylosuccinate lyase
Pf3D7_02_v3	273825	274268	444	274054	192	40.7923	3.12338	39.2087	CSA_5mC_peak_291	PF3D7_0206700	ADSL	adenylosuccinate lyase
Pf3D7_02_v3	276081	276354	274	276170	121	7.96558	1.72068	7.05418	CSA_5mC_peak_292	PF3D7_0206900	MSP5	merozoite surface protein 5
Pf3D7_02_v3	277464	278323	860	278114	267	75.4204	3.93551	72.9551	CSA_5mC_peak_293	PF3D7_0207000	MSP4	merozoite surface protein 4
Pf3D7_02_v3	281443	281709	267	281512	116	8.89886	1.81228	7.96202	CSA_5mC_peak_294	PF3D7_0207100		conserved Plasmodium protein, unknown function
Pf3D7_02_v3	281930	282290	361	282108	170	22.1215	2.32097	20.9003	CSA_5mC_peak_295	PF3D7_0207100		conserved Plasmodium protein, unknown function
Pf3D7_02_v3	283013	283900	888	283675	273	73.7258	3.79283	71.3036	CSA_5mC_peak_296	PF3D7_0207100		conserved Plasmodium protein, unknown function
Pf3D7_02_v3	284060	284629	570	284327	199	24.7145	2.28105	23.4435	CSA_5mC_peak_297	PF3D7_0207100		conserved Plasmodium protein, unknown function
Pf3D7_02_v3	284966	285453	488	285228	250	61.9076	3.52895	59.805	CSA_5mC_peak_298	PF3D7_0207100		conserved Plasmodium protein, unknown function
Pf3D7_02_v3	290866	291138	273	291042	127	7.62383	1.67332	6.72188	CSA_5mC_peak_299	PF3D7_0207300	SERA8	serine repeat antigen 8
Pf3D7_02_v3	294723	295052	330	294873	183	25.6418	2.41893	24.3529	CSA_5mC_peak_300	PF3D7_0207400	SERA7	serine repeat antigen 7
Pf3D7_02_v3	295386	295680	295	295531	149	12.0206	1.87008	11.0096	CSA_5mC_peak_301	PF3D7_0207400	SERA7	serine repeat antigen 7
Pf3D7_02_v3	295833	296135	303	296036	134	8.7904	1.7277	7.85672	CSA_5mC_peak_302	PF3D7_0207400	SERA7	serine repeat antigen 7
Pf3D7_02_v3	299385	299686	302	299557	167	21.0088	2.28025	19.809	CSA_5mC_peak_303	PF3D7_0207500	SERA6	serine repeat antigen 6
Pf3D7_02_v3	299945	300549	605	300351	154	15.0085	2.02075	13.9316	CSA_5mC_peak_304	PF3D7_0207500	SERA6	serine repeat antigen 6
Pf3D7_02_v3	304137	304539	403	304287	186	26.1036	2.42248	24.806	CSA_5mC_peak_305	PF3D7_0207600	SERA5	serine repeat antigen 5
Pf3D7_02_v3	305052	305386	335	305256	136	11.1193	1.87164	10.1289	CSA_5mC_peak_306	PF3D7_0207600	SERA5	serine repeat antigen 5
Pf3D7_02_v3	306681	306981	301	306834	115	9.0702	1.83022	8.12935	CSA_5mC_peak_307	PF3D7_0207600	SERA5	serine repeat antigen 5
Pf3D7_02_v3	309000	309806	807	309217	196	34.5027	2.76354	33.046	CSA_5mC_peak_308	PF3D7_0207700	SERA4	serine repeat antigen 4
Pf3D7_02_v3	314820	315270	451	315127	135	9.12417	1.74599	8.18207	CSA_5mC_peak_309	PF3D7_0207800	SERA3	serine repeat antigen 3
Pf3D7_02_v3	317815	318292	478	318080	151	17.5836	2.18692	16.4528	CSA_5mC_peak_310	PF3D7_0207900	SERA2	serine repeat antigen 2
Pf3D7_02_v3	318388	318653	266	318537	144	12.0819	1.89556	11.0686	CSA_5mC_peak_311	PF3D7_0207900	SERA2	serine repeat antigen 2
Pf3D7_02_v3	320473	321013	541	320653	198	35.1554	2.77928	33.6862	CSA_5mC_peak_312	PF3D7_0207900	SERA2	serine repeat antigen 2
Pf3D7_02_v3	322998	323299	302	323163	163	20.3643	2.27016	19.1774	CSA_5mC_peak_313	PF3D7_0208000	SERA1	serine repeat antigen 1
Pf3D7_02_v3	325667	325928	262	325721	100	5.8222	1.63452	4.97393	CSA_5mC_peak_314	PF3D7_0208000	SERA1	serine repeat antigen 1
Pf3D7_02_v3	331654	332403	750	331951	285	81.5038	3.98531	78.8633	CSA_5mC_peak_315	PF3D7_0208100		conserved Plasmodium protein, unknown function
Pf3D7_02_v3	332758	333100	343	332929	220	33.4912	2.5477	32.0545	CSA_5mC_peak_316	PF3D7_0208100		conserved Plasmodium protein, unknown function
Pf3D7_02_v3	333287	334063	777	333863	236	47.1148	3.01559	45.3889	CSA_5mC_peak_317	PF3D7_0208100		conserved Plasmodium protein, unknown function
Pf3D7_02_v3	334386	334852	467	334615	340	102.366	4.18982	99.1256	CSA_5mC_peak_318	PF3D7_0208100		conserved Plasmodium protein, unknown function
Pf3D7_02_v3	335641	336057	417	335846	177	16.2579	1.98271	15.1545	CSA_5mC_peak_319	PF3D7_0208200	KRR1	KRR1 small subunit processome component, putative
Pf3D7_02_v3	344016	344281	266	344189	125	8.99614	1.77788	8.05704	CSA_5mC_peak_320	PF3D7_0208400		conserved Plasmodium protein, unknown function
Pf3D7_02_v3	344572	344990	419	344793	229	46.2552	3.03639	44.5504	CSA_5mC_peak_321	PF3D7_0208400		conserved Plasmodium protein, unknown function
Pf3D7_02_v3	345338	345777	440	345574	261	67.1773	3.64279	64.9344	CSA_5mC_peak_322	PF3D7_0208400		conserved Plasmodium protein, unknown function
Pf3D7_02_v3	347010	347271	262	347095	133	12.7913	1.99578	11.7615	CSA_5mC_peak_323	PF3D7_0208400		conserved Plasmodium protein, unknown function
Pf3D7_02_v3	348718	349389	672	349232	225	49.8315	3.23546	48.0384	CSA_5mC_peak_324	PF3D7_0208400		conserved Plasmodium protein, unknown function
Pf3D7_02_v3	349981	350444	464	350196	258	76.1143	4.08131	73.63	CSA_5mC_peak_325	PF3D7_0208400		conserved Plasmodium protein, unknown function
Pf3D7_02_v3	354850	355705	856	355432	300	85.9824	3.99895	83.2191	CSA_5mC_peak_326	PF3D7_0208600	RRF1	ribosome-recycling factor
Pf3D7_02_v3	360007	360244	238	360168	123	9.76716	1.8416	8.80848	CSA_5mC_peak_327	PF3D7_0208800		protein P22, putative
Pf3D7_02_v3	360927	361298	372	361097	186	31.8956	2.71429	30.489	CSA_5mC_peak_328	PF3D7_0208900	P230p	6-cysteine protein P230p
Pf3D7_02_v3	363525	363967	443	363799	145	13.4353	1.97311	12.3916	CSA_5mC_peak_329	PF3D7_0208900	P230p	6-cysteine protein P230p
Pf3D7_02_v3	366918	367506	589	367011	146	14.8444	2.05303	13.7698	CSA_5mC_peak_330	PF3D7_0208900	P230p	6-cysteine protein P230p
Pf3D7_02_v3	370117	370506	390	370322	212	31.4758	2.50934	30.077	CSA_5mC_peak_331	PF3D7_0209000	P230	6-cysteine protein P230
Pf3D7_02_v3	370722	372326	1605	371841	243	63.8426	3.69462	61.6871	CSA_5mC_peak_332	PF3D7_0209000	P230	6-cysteine protein P230
Pf3D7_02_v3	372386	372936	551	372588	161	19.1115	2.21318	17.9498	CSA_5mC_peak_333	PF3D7_0209000	P230	6-cysteine protein P230
Pf3D7_02_v3	382284	382927	644	382692	118	10.5669	1.92582	9.58917	CSA_5mC_peak_334	PF3D7_0209100	PATPL1	patatin-like phospholipase 1
Pf3D7_02_v3	385867	386096	230	385954	125	12.732	2.0391	11.7029	CSA_5mC_peak_335	PF3D7_0209200	MTR3	exosome complex component MTR3, putative
Pf3D7_02_v3	391579	392342	764	391887	254	60.2538	3.41675	58.1948	CSA_5mC_peak_336	PF3D7_0209500		conserved Plasmodium protein, unknown function
Pf3D7_02_v3	397680	398292	613	398143	149	12.1078	1.87524	11.093	CSA_5mC_peak_337	PF3D7_0209600		transporter, putative
Pf3D7_02_v3	400115	400509	395	400297	220	54.98	3.5385	53.0545	CSA_5mC_peak_338	PF3D7_0209700		RING zinc finger protein, putative
Pf3D7_02_v3	401562	401803	242	401680	149	13.8645	1.97901	12.8114	CSA_5mC_peak_339	PF3D7_0209700		RING zinc finger protein, putative
Pf3D7_02_v3	408113	408462	350	408281	187	34.07	2.81824	32.6215	CSA_5mC_peak_340	intergenic
Pf3D7_02_v3	413769	414366	598	414075	215	47.3458	3.21708	45.6147	CSA_5mC_peak_341	PF3D7_0210200		conserved Plasmodium protein, unknown function
Pf3D7_02_v3	414651	415003	353	414829	169	24.8213	2.47325	23.5482	CSA_5mC_peak_342	PF3D7_0210200		conserved Plasmodium protein, unknown function
Pf3D7_02_v3	417693	418052	360	417907	146	10.7501	1.80617	9.76777	CSA_5mC_peak_343	PF3D7_0210200		conserved Plasmodium protein, unknown function
Pf3D7_02_v3	418454	418825	372	418626	156	16.0238	2.06831	14.9253	CSA_5mC_peak_344	PF3D7_0210200		conserved Plasmodium protein, unknown function
Pf3D7_02_v3	419585	420025	441	419779	210	45.8857	3.19653	44.1897	CSA_5mC_peak_345	PF3D7_0210200		conserved Plasmodium protein, unknown function
Pf3D7_02_v3	420390	421118	729	420639	222	44.6802	3.02584	43.0119	CSA_5mC_peak_346	PF3D7_0210200		conserved Plasmodium protein, unknown function
Pf3D7_02_v3	424260	424576	317	424406	181	29.778	2.64515	28.4112	CSA_5mC_peak_347	PF3D7_0210300		monocarboxylate transporter, putative
Pf3D7_02_v3	427751	428365	615	428230	151	14.2887	1.99407	13.2262	CSA_5mC_peak_348	PF3D7_0210500		conserved Plasmodium protein, unknown function
Pf3D7_02_v3	433587	433834	248	433669	140	14.2382	2.04926	13.1765	CSA_5mC_peak_349	PF3D7_0210600	CERLI1	protein CERLI1
Pf3D7_02_v3	436072	436382	311	436244	148	13.5595	1.96582	12.5135	CSA_5mC_peak_350	PF3D7_0210700	SYN17	syntaxin, Qa-SNARE family
Pf3D7_02_v3	454643	455014	372	454745	143	8.79531	1.69646	7.86152	CSA_5mC_peak_351	PF3D7_0211100		conserved Plasmodium protein, unknown function
Pf3D7_02_v3	463332	463834	503	463652	220	47.6006	3.17966	45.8632	CSA_5mC_peak_352	PF3D7_0211500		GAF domain-related protein, putative
Pf3D7_02_v3	464432	465179	748	464775	276	75.4182	3.83124	72.9529	CSA_5mC_peak_353	PF3D7_0211500		GAF domain-related protein, putative
Pf3D7_02_v3	470706	471850	1145	471039	244	64.6885	3.72234	62.511	CSA_5mC_peak_354	PF3D7_0211700	TKL1	tyrosine kinase-like protein, putative
Pf3D7_02_v3	475222	475742	521	475419	227	52.6599	3.34771	50.7947	CSA_5mC_peak_355	PF3D7_0211800	AsnRS	asparagine--tRNA ligase
Pf3D7_02_v3	476778	477005	228	476874	110	6.86876	1.68158	5.98875	CSA_5mC_peak_356	PF3D7_0211800	AsnRS	asparagine--tRNA ligase
Pf3D7_02_v3	477619	478146	528	477813	168	16.9539	2.0588	15.8361	CSA_5mC_peak_357	PF3D7_0211800	AsnRS	asparagine--tRNA ligase
Pf3D7_02_v3	481379	481626	248	481478	141	18.2873	2.29803	17.1421	CSA_5mC_peak_358	PF3D7_0212000		GDP-fructose:GMP antiporter, putative
Pf3D7_02_v3	487020	488263	1244	487952	335	101.195	4.20054	97.9905	CSA_5mC_peak_359	PF3D7_0212100		conserved Plasmodium protein, unknown function
Pf3D7_02_v3	490132	490515	384	490322	187	32.4083	2.73235	30.9919	CSA_5mC_peak_360	PF3D7_0212200		ribosomal protein L12, mitochondrial, putative
Pf3D7_02_v3	493355	493973	619	493543	176	25.7479	2.47202	24.4571	CSA_5mC_peak_361	PF3D7_0212300	ERF1	eukaryotic peptide chain release factor subunit 1, putative
Pf3D7_02_v3	496438	496670	233	496510	148	16.1899	2.12241	15.0874	CSA_5mC_peak_362	PF3D7_0212400		conserved Plasmodium membrane protein, unknown function
Pf3D7_02_v3	499207	499541	335	499376	153	15.7747	2.06996	14.6805	CSA_5mC_peak_363	PF3D7_0212400		conserved Plasmodium membrane protein, unknown function
Pf3D7_02_v3	504001	504561	561	504274	164	17.3408	2.09946	16.215	CSA_5mC_peak_364	PF3D7_0212400		conserved Plasmodium membrane protein, unknown function
Pf3D7_02_v3	505651	505911	261	505773	164	14.7547	1.96	13.6831	CSA_5mC_peak_365	PF3D7_0212400		conserved Plasmodium membrane protein, unknown function
Pf3D7_02_v3	509516	510700	1185	510433	210	32.0821	2.54875	30.6722	CSA_5mC_peak_366	PF3D7_0212500		conserved Plasmodium protein, unknown function
Pf3D7_02_v3	511419	511734	316	511591	196	29.2796	2.51092	27.9222	CSA_5mC_peak_367	PF3D7_0212500		conserved Plasmodium protein, unknown function
Pf3D7_02_v3	513311	514021	711	513647	271	77.1074	3.9618	74.598	CSA_5mC_peak_368	PF3D7_0212500		conserved Plasmodium protein, unknown function
Pf3D7_02_v3	518142	518522	381	518352	208	33.2108	2.61284	31.779	CSA_5mC_peak_369	PF3D7_0212500		conserved Plasmodium protein, unknown function
Pf3D7_02_v3	518890	519354	465	519045	155	20.3682	2.32345	19.1812	CSA_5mC_peak_370	PF3D7_0212500		conserved Plasmodium protein, unknown function
Pf3D7_02_v3	520660	520984	325	520807	146	14.5152	2.03318	13.4475	CSA_5mC_peak_371	PF3D7_0212500		conserved Plasmodium protein, unknown function
Pf3D7_02_v3	523607	523978	372	523891	124	11.1572	1.93465	10.1662	CSA_5mC_peak_372	PF3D7_0212600	SPATR	secreted protein with altered thrombospondin repeat domain
Pf3D7_02_v3	525291	525603	313	525460	173	23.5499	2.37712	22.3012	CSA_5mC_peak_373	PF3D7_0212700		SRR1-like protein
Pf3D7_02_v3	525773	526048	276	525887	177	33.4923	2.88063	32.0548	CSA_5mC_peak_374	PF3D7_0212700		SRR1-like protein
Pf3D7_02_v3	528795	529298	504	529100	211	36.0679	2.7217	34.5809	CSA_5mC_peak_375	PF3D7_0212800	MATE	multidrug efflux pump, putative
Pf3D7_02_v3	529408	529659	252	529497	122	7.4184	1.67672	6.5225	CSA_5mC_peak_376	PF3D7_0212800	MATE	multidrug efflux pump, putative
Pf3D7_02_v3	530373	531098	726	530674	176	33.0245	2.86445	31.596	CSA_5mC_peak_377	PF3D7_0212800	MATE	multidrug efflux pump, putative
Pf3D7_02_v3	533199	533606	408	533413	137	16.8229	2.2333	15.7074	CSA_5mC_peak_378	PF3D7_0212900	ATEL1	arginyl-tRNA--protein transferase
Pf3D7_02_v3	535607	535880	274	535728	133	15.4079	2.16857	14.3215	CSA_5mC_peak_379	PF3D7_0213000		conserved protein, unknown function
Pf3D7_02_v3	538089	538496	408	538208	149	15.3576	2.06724	14.2733	CSA_5mC_peak_380	PF3D7_0213100	SIS1	protein SIS1
Pf3D7_02_v3	538781	539127	347	538934	120	4.99882	1.49959	4.17777	CSA_5mC_peak_381	PF3D7_0213100	SIS1	protein SIS1
Pf3D7_02_v3	540089	540326	238	540185	128	13.7109	2.08765	12.6606	CSA_5mC_peak_382	PF3D7_0213100	SIS1	protein SIS1
Pf3D7_02_v3	542974	543253	280	543141	123	9.73858	1.83957	8.78055	CSA_5mC_peak_383	PF3D7_0213400	PK7	protein kinase 7
Pf3D7_02_v3	545036	545377	342	545186	147	16.2741	2.1334	15.1704	CSA_5mC_peak_384	PF3D7_0213500		tetratricopeptide repeat protein, putative
Pf3D7_02_v3	546490	546730	241	546607	134	12.0578	1.94233	11.0463	CSA_5mC_peak_385	PF3D7_0213600		conserved Plasmodium protein, unknown function
Pf3D7_02_v3	549777	550036	260	549889	128	9.88024	1.82596	8.91899	CSA_5mC_peak_386	PF3D7_0213600		conserved Plasmodium protein, unknown function
Pf3D7_02_v3	550259	550511	253	550390	139	10.6787	1.8302	9.69801	CSA_5mC_peak_387	PF3D7_0213600		conserved Plasmodium protein, unknown function
Pf3D7_02_v3	551483	551755	273	551599	158	14.7673	1.98776	13.695	CSA_5mC_peak_388	PF3D7_0213600		conserved Plasmodium protein, unknown function
Pf3D7_02_v3	553175	553593	419	553392	157	15.0865	2.01039	14.007	CSA_5mC_peak_389	PF3D7_0213600		conserved Plasmodium protein, unknown function
Pf3D7_02_v3	554252	554914	663	554551	335	115.255	4.74528	111.542	CSA_5mC_peak_390	PF3D7_0213600		conserved Plasmodium protein, unknown function
Pf3D7_02_v3	557857	558193	337	558033	168	17.6299	2.09447	16.4981	CSA_5mC_peak_391	PF3D7_0213700		conserved protein, unknown function
Pf3D7_02_v3	561574	561905	332	561789	111	6.25125	1.62778	5.39004	CSA_5mC_peak_392	PF3D7_0213900		RTR1 domain-containing protein, putative
Pf3D7_02_v3	562041	562915	875	562633	305	99.4261	4.49298	96.2751	CSA_5mC_peak_393	PF3D7_0213900		RTR1 domain-containing protein, putative
Pf3D7_02_v3	563031	563576	546	563368	201	34.3198	2.71515	32.8669	CSA_5mC_peak_394	PF3D7_0213900		RTR1 domain-containing protein, putative
Pf3D7_02_v3	566637	567027	391	566858	111	5.10397	1.53344	4.27995	CSA_5mC_peak_395	PF3D7_0214000	CCT8	T-complex protein 1 subunit theta
Pf3D7_02_v3	569582	570273	692	570018	184	29.5385	2.60922	28.1758	CSA_5mC_peak_396	PF3D7_0214100	SEC31	protein transport protein SEC31
Pf3D7_02_v3	570653	570897	245	570753	136	11.0563	1.86757	10.0668	CSA_5mC_peak_397	PF3D7_0214100	SEC31	protein transport protein SEC31
Pf3D7_02_v3	571010	571501	492	571306	220	42.4816	2.94288	40.8618	CSA_5mC_peak_398	PF3D7_0214100	SEC31	protein transport protein SEC31
Pf3D7_02_v3	572821	573162	342	573032	157	17.6323	2.15384	16.5005	CSA_5mC_peak_399	PF3D7_0214100	SEC31	protein transport protein SEC31
Pf3D7_02_v3	578442	578775	334	578614	169	29.8185	2.75117	28.4503	CSA_5mC_peak_400	PF3D7_0214300		conserved Plasmodium protein, unknown function
Pf3D7_02_v3	580025	580457	433	580294	129	13.3477	2.05654	12.3055	CSA_5mC_peak_401	PF3D7_0214300		conserved Plasmodium protein, unknown function
Pf3D7_02_v3	581431	581712	282	581578	128	12.0648	1.97519	11.0524	CSA_5mC_peak_402	PF3D7_0214300		conserved Plasmodium protein, unknown function
Pf3D7_02_v3	583883	585323	1441	584826	318	92.5467	4.05896	89.5955	CSA_5mC_peak_403	PF3D7_0214300		conserved Plasmodium protein, unknown function
Pf3D7_02_v3	585695	586330	636	586072	334	105.638	4.3794	102.29	CSA_5mC_peak_404	PF3D7_0214300		conserved Plasmodium protein, unknown function
Pf3D7_02_v3	586607	587171	565	586926	222	52.9343	3.41448	51.0627	CSA_5mC_peak_405	PF3D7_0214300		conserved Plasmodium protein, unknown function
Pf3D7_02_v3	587326	588019	694	587751	225	46.8016	3.09592	45.0837	CSA_5mC_peak_406	PF3D7_0214400		protein LTV1, putative
Pf3D7_02_v3	588163	589035	873	588680	225	58.2772	3.64272	56.2687	CSA_5mC_peak_407	PF3D7_0214400		protein LTV1, putative
Pf3D7_02_v3	593232	593476	245	593306	111	8.5125	1.80756	7.58625	CSA_5mC_peak_408	PF3D7_0214600	STK2	serine/threonine protein kinase STK2, putative
Pf3D7_02_v3	594364	594853	490	594630	205	36.1045	2.76891	34.617	CSA_5mC_peak_409	PF3D7_0214600	STK2	serine/threonine protein kinase STK2, putative
Pf3D7_02_v3	595048	595452	405	595244	200	28.0466	2.42795	26.7119	CSA_5mC_peak_410	PF3D7_0214600	STK2	serine/threonine protein kinase STK2, putative
Pf3D7_02_v3	595688	596572	885	595922	247	54.7313	3.24669	52.8123	CSA_5mC_peak_411	PF3D7_0214600	STK2	serine/threonine protein kinase STK2, putative
Pf3D7_02_v3	596762	597335	574	596999	267	70.1657	3.70676	67.8411	CSA_5mC_peak_412	PF3D7_0214600	STK2	serine/threonine protein kinase STK2, putative
Pf3D7_02_v3	597466	597943	478	597690	207	35.3687	2.71915	33.8957	CSA_5mC_peak_413	PF3D7_0214600	STK2	serine/threonine protein kinase STK2, putative
Pf3D7_02_v3	606107	606489	383	606300	247	69.8826	3.93068	67.5655	CSA_5mC_peak_414	PF3D7_0214800		conserved Plasmodium membrane protein, unknown function
Pf3D7_02_v3	607759	608548	790	608207	225	43.6571	2.95446	42.0119	CSA_5mC_peak_415	PF3D7_0214800		conserved Plasmodium membrane protein, unknown function
Pf3D7_02_v3	611087	612604	1518	611928	327	103.191	4.36771	99.924	CSA_5mC_peak_416	PF3D7_0214900	RON6	rhoptry neck protein 6
Pf3D7_02_v3	615000	615239	240	615166	126	13.055	2.05528	12.0188	CSA_5mC_peak_417	PF3D7_0214900	RON6	rhoptry neck protein 6
Pf3D7_02_v3	618168	618993	826	618311	192	40.7923	3.12338	39.2087	CSA_5mC_peak_418	PF3D7_0215000	ACS9	acyl-CoA synthetase
Pf3D7_02_v3	619984	620326	343	620178	153	22.4847	2.46345	21.2565	CSA_5mC_peak_419	PF3D7_0215000	ACS9	acyl-CoA synthetase
Pf3D7_02_v3	627003	627281	279	627126	121	7.07945	1.65539	6.19311	CSA_5mC_peak_420	PF3D7_0215200		conserved Plasmodium protein, unknown function
Pf3D7_02_v3	628646	629130	485	628873	229	48.8112	3.15071	47.0438	CSA_5mC_peak_421	PF3D7_0215300	ACS8	acyl-CoA synthetase
Pf3D7_02_v3	635321	635962	642	635560	218	49.063	3.26953	47.2894	CSA_5mC_peak_422	PF3D7_0215400		conserved Plasmodium protein, unknown function
Pf3D7_02_v3	637210	637598	389	637412	206	48.0598	3.34995	46.311	CSA_5mC_peak_423	PF3D7_0215400		conserved Plasmodium protein, unknown function
Pf3D7_02_v3	641378	641782	405	641566	193	27.5231	2.4467	26.1991	CSA_5mC_peak_424	PF3D7_0215500		conserved Plasmodium protein, unknown function
Pf3D7_02_v3	641911	642549	639	642322	173	31.6357	2.8159	30.2335	CSA_5mC_peak_425	PF3D7_0215500		conserved Plasmodium protein, unknown function
Pf3D7_02_v3	643717	644330	614	644178	156	19.7664	2.2818	18.5918	CSA_5mC_peak_426	PF3D7_0215600	GET2	Golgi to ER traffic protein 2
Pf3D7_02_v3	647741	648065	325	647947	112	5.85751	1.5923	5.00806	CSA_5mC_peak_427	PF3D7_0215700	RPB2	DNA-directed RNA polymerase II subunit RPB2, putative
Pf3D7_02_v3	649661	649888	228	649757	126	6.38339	1.58771	5.51774	CSA_5mC_peak_428	PF3D7_0215700	RPB2	DNA-directed RNA polymerase II subunit RPB2, putative
Pf3D7_02_v3	651920	652147	228	652045	135	11.6051	1.90782	10.6023	CSA_5mC_peak_429	PF3D7_0215800	ORC5	origin recognition complex subunit 5
Pf3D7_02_v3	652893	653182	290	653002	131	9.34051	1.77626	8.3927	CSA_5mC_peak_430	PF3D7_0215800	ORC5	origin recognition complex subunit 5
Pf3D7_02_v3	653378	653825	448	653642	126	13.055	2.05528	12.0188	CSA_5mC_peak_431	PF3D7_0215800	ORC5	origin recognition complex subunit 5
Pf3D7_02_v3	654054	654377	324	654206	189	39.2908	3.07483	37.7386	CSA_5mC_peak_432	intergenic
Pf3D7_02_v3	658677	659026	350	658859	131	14.7194	2.1362	13.6483	CSA_5mC_peak_433	PF3D7_0216000		DEAD/DEAH box helicase, putative
Pf3D7_02_v3	660640	660939	300	660837	127	7.40961	1.65817	6.51385	CSA_5mC_peak_434	PF3D7_0216000		DEAD/DEAH box helicase, putative
Pf3D7_02_v3	662825	664742	1918	664492	287	90.6044	4.35247	87.7121	CSA_5mC_peak_435	PF3D7_0216000		DEAD/DEAH box helicase, putative
Pf3D7_02_v3	669200	669431	232	669325	127	10.6245	1.88185	9.64522	CSA_5mC_peak_436	PF3D7_0216200		Alba domain-containing protein, putative
Pf3D7_02_v3	672856	673656	801	673107	302	91.8237	4.21284	88.8947	CSA_5mC_peak_437	PF3D7_0216300		conserved Plasmodium protein, unknown function
Pf3D7_02_v3	679414	679687	274	679595	137	14.92	2.11047	13.8442	CSA_5mC_peak_438	PF3D7_0216500		conserved Plasmodium protein, unknown function
Pf3D7_02_v3	682421	683962	1542	682938	230	51.9573	3.28456	50.1096	CSA_5mC_peak_439	PF3D7_0216500		conserved Plasmodium protein, unknown function
Pf3D7_02_v3	686557	686955	399	686848	128	8.78178	1.75038	7.84822	CSA_5mC_peak_440	PF3D7_0216600		sugar transporter, putative
Pf3D7_02_v3	687218	687608	391	687401	143	10.4613	1.80023	9.48602	CSA_5mC_peak_441	PF3D7_0216600		sugar transporter, putative
Pf3D7_02_v3	692779	695790	3012	695256	307	84.9663	3.88444	82.2312	CSA_5mC_peak_442	PF3D7_0216700	ATG11	autophagy-related protein 11, putative
Pf3D7_02_v3	698587	698908	322	698744	136	16.4645	2.21712	15.3561	CSA_5mC_peak_443	PF3D7_0216800		TMEM121 domain-containing protein, putative
Pf3D7_02_v3	700368	700685	318	700590	115	9.69175	1.87727	8.73477	CSA_5mC_peak_444	intergenic
Pf3D7_02_v3	701223	701658	436	701413	174	28.3021	2.62337	26.963	CSA_5mC_peak_445	PF3D7_0216900		conserved Plasmodium protein, unknown function
Pf3D7_02_v3	701732	702396	665	701991	249	64.4609	3.65408	62.2889	CSA_5mC_peak_446	PF3D7_0216900		conserved Plasmodium protein, unknown function
Pf3D7_02_v3	703951	704244	294	704099	122	11.7834	1.99055	10.7766	CSA_5mC_peak_447	PF3D7_0217000		conserved Plasmodium membrane protein, unknown function
Pf3D7_02_v3	704713	704958	246	704853	126	13.055	2.05528	12.0188	CSA_5mC_peak_448	PF3D7_0217000		conserved Plasmodium membrane protein, unknown function
Pf3D7_02_v3	707840	708483	644	708122	229	44.9657	2.97952	43.2905	CSA_5mC_peak_449	PF3D7_0217100		ATP synthase subunit alpha, mitochondrial
Pf3D7_02_v3	710089	710433	345	710211	142	12.6581	1.94034	11.633	CSA_5mC_peak_450	PF3D7_0217200		conserved Plasmodium protein, unknown function
Pf3D7_02_v3	713286	713757	472	713624	140	16.2756	2.17758	15.1719	CSA_5mC_peak_451	PF3D7_0217200		conserved Plasmodium protein, unknown function
Pf3D7_02_v3	714687	715036	350	714841	181	28.7668	2.59247	27.4189	CSA_5mC_peak_452	PF3D7_0217200		conserved Plasmodium protein, unknown function
Pf3D7_02_v3	720260	720864	605	720613	194	41.8044	3.15575	40.1993	CSA_5mC_peak_453	PF3D7_0217500	CDPK1	calcium-dependent protein kinase 1
Pf3D7_02_v3	721209	721566	358	721330	149	12.9621	1.92573	11.9293	CSA_5mC_peak_454	PF3D7_0217500	CDPK1	calcium-dependent protein kinase 1
Pf3D7_02_v3	725141	725970	830	725728	226	55.0306	3.47156	53.1035	CSA_5mC_peak_455	PF3D7_0217600		conserved Plasmodium protein, unknown function
Pf3D7_02_v3	726633	727016	384	726830	225	45.5173	3.03774	43.8296	CSA_5mC_peak_456	PF3D7_0217600		conserved Plasmodium protein, unknown function
Pf3D7_02_v3	736491	736801	311	736636	166	17.6582	2.10618	16.5259	CSA_5mC_peak_457	PF3D7_0217900		thioesterase/thiol ester dehydrase-isomerase, putative
Pf3D7_02_v3	738998	739270	273	739085	139	14.5851	2.07693	13.5162	CSA_5mC_peak_458	PF3D7_0218000	RFC2	replication factor C subunit 2, putative
Pf3D7_02_v3	743680	744389	710	743872	200	32.6352	2.64242	31.2145	CSA_5mC_peak_459	PF3D7_0218200		SUZ domain-containing protein, putative
Pf3D7_02_v3	744994	745642	649	745463	146	20.1853	2.37895	19.0015	CSA_5mC_peak_460	PF3D7_0218200		SUZ domain-containing protein, putative
Pf3D7_02_v3	751156	751737	582	751534	217	51.6824	3.4087	49.8428	CSA_5mC_peak_461	PF3D7_0218400	DDX47	ATP-dependent RNA helicase DDX47, putative
Pf3D7_02_v3	755615	755915	301	755813	161	16.0279	2.04312	14.9292	CSA_5mC_peak_462	PF3D7_0218600		patatin-like phospholipase, putative
Pf3D7_02_v3	756403	757343	941	757105	214	37.9561	2.78521	36.4313	CSA_5mC_peak_463	PF3D7_0218600		patatin-like phospholipase, putative
Pf3D7_02_v3	758035	758712	678	758252	249	60.1212	3.46061	58.0653	CSA_5mC_peak_464	PF3D7_0218600		patatin-like phospholipase, putative
Pf3D7_02_v3	759922	760367	446	760120	223	47.595	3.15075	45.8579	CSA_5mC_peak_465	PF3D7_0218600		patatin-like phospholipase, putative
Pf3D7_02_v3	761872	762298	427	762072	266	68.1542	3.63183	65.885	CSA_5mC_peak_466	PF3D7_0218600		patatin-like phospholipase, putative
Pf3D7_02_v3	763663	764899	1237	763952	257	59.5032	3.3566	57.4635	CSA_5mC_peak_467	PF3D7_0218700	PRP45	pre-mRNA-processing protein 45, putative
Pf3D7_02_v3	769777	770042	266	769935	124	8.48326	1.74578	7.55759	CSA_5mC_peak_468	PF3D7_0219100		saccharopine dehydrogenase, putative
Pf3D7_02_v3	776931	777312	382	777115	238	50.0306	3.12441	48.2324	CSA_5mC_peak_469	PF3D7_0219500		pseudouridine synthase, putative
Pf3D7_02_v3	777961	778253	293	778106	190	30.0823	2.59164	28.7096	CSA_5mC_peak_470	PF3D7_0219500		pseudouridine synthase, putative
Pf3D7_02_v3	780504	780831	328	780642	157	10.6414	1.75994	9.66167	CSA_5mC_peak_471	PF3D7_0219600	RFC1	replication factor C subunit 1
Pf3D7_02_v3	781595	782073	479	781978	119	4.49821	1.46187	3.69546	CSA_5mC_peak_472	PF3D7_0219600	RFC1	replication factor C subunit 1
Pf3D7_02_v3	787177	787637	461	787394	203	42.926	3.11982	41.2969	CSA_5mC_peak_473	PF3D7_0219800		Plasmodium exported protein (PHISTc), unknown function
Pf3D7_02_v3	797160	798170	1011	797669	236	56.013	3.40986	54.0607	CSA_5mC_peak_474	PF3D7_0220000	LSA3	liver stage antigen 3
Pf3D7_02_v3	798638	801179	2542	800412	272	64.695	3.43081	62.5173	CSA_5mC_peak_475	PF3D7_0220000	LSA3	liver stage antigen 3
Pf3D7_02_v3	801405	801656	252	801549	155	18.2367	2.20021	17.093	CSA_5mC_peak_476	PF3D7_0220000	LSA3	liver stage antigen 3
Pf3D7_02_v3	805248	805625	378	805405	132	10.6821	1.86158	9.70133	CSA_5mC_peak_477	PF3D7_0220100		DnaJ protein, putative
Pf3D7_02_v3	805842	806294	453	805984	191	38.9752	3.03735	37.4294	CSA_5mC_peak_478	PF3D7_0220100		DnaJ protein, putative
Pf3D7_02_v3	807179	807732	554	807532	154	13.2645	1.92096	12.2247	CSA_5mC_peak_479	PF3D7_0220100		DnaJ protein, putative
Pf3D7_02_v3	809361	809905	545	809773	151	14.803	2.02406	13.7293	CSA_5mC_peak_480	PF3D7_0220200		Plasmodium exported protein, unknown function
Pf3D7_02_v3	814922	815214	293	815087	185	33.7197	2.81779	32.278	CSA_5mC_peak_481	PF3D7_0220300		Plasmodium exported protein, unknown function
Pf3D7_02_v3	820820	821070	251	820945	109	4.52403	1.4898	3.72045	CSA_5mC_peak_482	intergenic
Pf3D7_02_v3	822134	822486	353	822311	161	19.55	2.23754	18.3794	CSA_5mC_peak_483	intergenic
Pf3D7_02_v3	823929	824551	623	824084	130	13.7946	2.08049	12.7436	CSA_5mC_peak_484	PF3D7_0220500		Plasmodium exported protein (hyp2), unknown function
Pf3D7_02_v3	828295	828570	276	828383	114	5.54478	1.56041	4.70592	CSA_5mC_peak_485	intergenic
Pf3D7_02_v3	834167	834643	477	834333	187	28.8265	2.55094	27.4776	CSA_5mC_peak_486	PF3D7_0220700		Plasmodium exported protein (hyp9), unknown function
Pf3D7_02_v3	834939	835256	318	835082	174	31.2241	2.78351	29.8297	CSA_5mC_peak_487	PF3D7_0220700		Plasmodium exported protein (hyp9), unknown function
Pf3D7_02_v3	844312	844600	289	844421	129	12.2173	1.97992	11.2007	CSA_5mC_peak_488	PF3D7_0220800	CLAG2	cytoadherence linked asexual protein 2
Pf3D7_02_v3	855561	855800	240	855658	137	12.3578	1.94634	11.3396	CSA_5mC_peak_489	PF3D7_0221200		Plasmodium exported protein (hyp15), unknown function
Pf3D7_02_v3	860945	861467	523	861271	161	20.7875	2.30659	19.5923	CSA_5mC_peak_490	PF3D7_0221400		stevor
Pf3D7_02_v3	866922	867304	383	867062	215	34.8863	2.64045	33.4227	CSA_5mC_peak_491	intergenic
Pf3D7_02_v3	869606	870726	1121	870499	246	52.0718	3.14283	50.2214	CSA_5mC_peak_492	PF3D7_0221700		Plasmodium exported protein, unknown function
Pf3D7_02_v3	889989	890358	370	890179	195	37.214	2.9077	35.7047	CSA_5mC_peak_493	PF3D7_0222500	RIF	rifin
Pf3D7_02_v3	893341	893759	419	893527	152	17.7482	2.19038	16.6142	CSA_5mC_peak_494	PF3D7_0222600	RIF	rifin
Pf3D7_02_v3	896558	897045	488	896805	193	36.2739	2.87803	34.7834	CSA_5mC_peak_495	PF3D7_0222700	RIF	rifin
Pf3D7_02_v3	899729	899992	264	899833	130	7.46909	1.65215	6.5719	CSA_5mC_peak_496	PF3D7_0222800		stevor
Pf3D7_02_v3	908008	908430	423	908194	197	38.7715	2.96815	37.2305	CSA_5mC_peak_497	PF3D7_0223200	RIF	rifin
Pf3D7_02_v3	913797	914117	321	913928	147	19.2806	2.31568	18.1156	CSA_5mC_peak_498	PF3D7_0223400	RIF	rifin
Pf3D7_02_v3	917562	918200	639	917783	210	50.2125	3.41468	48.4092	CSA_5mC_peak_499	PF3D7_0223500	VAR	erythrocyte membrane protein 1, PfEMP1
Pf3D7_02_v3	918480	923855	5376	922695	301	88.7173	4.09778	85.8772	CSA_5mC_peak_500	PF3D7_0223500	VAR	erythrocyte membrane protein 1, PfEMP1
Pf3D7_02_v3	934631	938272	3642	936322	240	50.8388	3.14194	49.0205	CSA_5mC_peak_501	intergenic
Pf3D7_02_v3	940958	941336	379	941218	122	6.687	1.62279	5.81253	CSA_5mC_peak_502	intergenic
Pf3D7_02_v3	941847	942423	577	942149	218	40.7136	2.87905	39.1321	CSA_5mC_peak_503	intergenic
Pf3D7_02_v3	942478	946635	4158	946114	278	91.3438	4.51347	88.4287	CSA_5mC_peak_504	intergenic
Pf3D7_03_v3	7552	8016	465	7743	137	16.8229	2.2333	15.7074	CSA_5mC_peak_505	intergenic
Pf3D7_03_v3	8146	8496	351	8306	123	10.8604	1.91917	9.87632	CSA_5mC_peak_506	intergenic
Pf3D7_03_v3	15492	15855	364	15681	179	29.9468	2.67034	28.5764	CSA_5mC_peak_507	intergenic
Pf3D7_03_v3	19783	20041	259	19907	125	6.75118	1.61761	5.87496	CSA_5mC_peak_508	intergenic
Pf3D7_03_v3	20359	20671	313	20452	112	5.26481	1.54376	4.43502	CSA_5mC_peak_509	intergenic
Pf3D7_03_v3	24584	25089	506	24945	126	7.92199	1.69805	7.01169	CSA_5mC_peak_510	intergenic
Pf3D7_03_v3	26830	27123	294	26924	114	4.5239	1.47639	3.72034	CSA_5mC_peak_511	intergenic
Pf3D7_03_v3	31338	31593	256	31459	157	23.3563	2.4829	22.1117	CSA_5mC_peak_512	intergenic
Pf3D7_03_v3	31779	32055	277	31869	100	5.38695	1.59556	4.5528	CSA_5mC_peak_513	intergenic
Pf3D7_03_v3	36774	39634	2861	37737	281	67.6272	3.4649	65.3722	CSA_5mC_peak_514	PF3D7_0300100	VAR	erythrocyte membrane protein 1, PfEMP1
Pf3D7_03_v3	39856	42197	2342	40833	222	47.2722	3.14517	45.5428	CSA_5mC_peak_515	PF3D7_0300100	VAR	erythrocyte membrane protein 1, PfEMP1
Pf3D7_03_v3	42406	43197	792	42960	174	32.0961	2.83208	30.6853	CSA_5mC_peak_516	PF3D7_0300100	VAR	erythrocyte membrane protein 1, PfEMP1
Pf3D7_03_v3	52604	53044	441	52869	162	22.0231	2.369	20.8039	CSA_5mC_peak_517	PF3D7_0300400		stevor
Pf3D7_03_v3	55429	55662	234	55591	140	12.6578	1.9502	11.6328	CSA_5mC_peak_518	PF3D7_0300500	RIF	rifin
Pf3D7_03_v3	55825	56220	396	56049	162	26.2071	2.60718	24.9078	CSA_5mC_peak_519	PF3D7_0300500	RIF	rifin
Pf3D7_03_v3	62025	62411	387	62195	180	30.1047	2.67044	28.7317	CSA_5mC_peak_520	PF3D7_0300700	RIF	rifin
Pf3D7_03_v3	68131	68392	262	68300	131	9.06607	1.75774	8.12527	CSA_5mC_peak_521	PF3D7_0300900		stevor
Pf3D7_03_v3	69382	69791	410	69596	249	58.5526	3.3922	56.5374	CSA_5mC_peak_522	PF3D7_0301000	ACS2	acyl-CoA synthetase
Pf3D7_03_v3	69969	70327	359	70131	126	10.4349	1.87373	9.4602	CSA_5mC_peak_523	PF3D7_0301000	ACS2	acyl-CoA synthetase
Pf3D7_03_v3	71030	71426	397	71239	188	28.1642	2.51097	26.8274	CSA_5mC_peak_524	PF3D7_0301000	ACS2	acyl-CoA synthetase
Pf3D7_03_v3	79645	79946	302	79855	124	12.4017	2.02216	11.3807	CSA_5mC_peak_525	PF3D7_0301200	FIKK3	serine/threonine protein kinase, FIKK family
Pf3D7_03_v3	82684	83235	552	83028	221	42.9591	2.9562	41.329	CSA_5mC_peak_526	PF3D7_0301300	EH1	epoxide hydrolase 1
Pf3D7_03_v3	85415	85888	474	85635	225	48.1229	3.15636	46.3724	CSA_5mC_peak_527	PF3D7_0301400		Plasmodium exported protein, unknown function
Pf3D7_03_v3	96292	96702	411	96375	134	10.6358	1.84933	9.65617	CSA_5mC_peak_528	PF3D7_0301700		Plasmodium exported protein, unknown function
Pf3D7_03_v3	106291	106557	267	106374	146	15.0719	2.06675	13.993	CSA_5mC_peak_529	PF3D7_0301900		conserved protein, unknown function
Pf3D7_03_v3	108394	108797	404	108549	128	8.04782	1.69944	7.13379	CSA_5mC_peak_530	PF3D7_0302000	PRP46	pre-mRNA-splicing factor PRP46, putative
Pf3D7_03_v3	109206	109782	577	109426	211	38.9131	2.85278	37.3686	CSA_5mC_peak_531	PF3D7_0302000	PRP46	pre-mRNA-splicing factor PRP46, putative
Pf3D7_03_v3	114748	115208	461	114882	184	27.6063	2.51099	26.28	CSA_5mC_peak_532	PF3D7_0302100	SRPK1	serine/threonine protein kinase
Pf3D7_03_v3	115328	115786	459	115533	164	21.1011	2.30434	19.8998	CSA_5mC_peak_533	PF3D7_0302100	SRPK1	serine/threonine protein kinase
Pf3D7_03_v3	117236	117984	749	117443	223	39.2542	2.7761	37.703	CSA_5mC_peak_534	PF3D7_0302100	SRPK1	serine/threonine protein kinase
Pf3D7_03_v3	124704	125086	383	124926	270	73.1511	3.80162	70.7442	CSA_5mC_peak_535	PF3D7_0302200	CLAG3.2	cytoadherence linked asexual protein 3.2
Pf3D7_03_v3	127219	127516	298	127410	142	10.45	1.80349	9.47487	CSA_5mC_peak_536	intergenic
Pf3D7_03_v3	128191	128619	429	128361	134	10.4374	1.83632	9.46263	CSA_5mC_peak_537	intergenic
Pf3D7_03_v3	128667	129462	796	129057	220	46.6561	3.13526	44.9415	CSA_5mC_peak_538	intergenic
Pf3D7_03_v3	130277	130619	343	130446	179	27.772	2.55592	26.4429	CSA_5mC_peak_539	intergenic
Pf3D7_03_v3	133686	134070	385	133894	165	23.1871	2.41261	21.9453	CSA_5mC_peak_540	intergenic
Pf3D7_03_v3	140380	141046	667	140877	262	68.9616	3.70933	66.671	CSA_5mC_peak_541	PF3D7_0302500	CLAG3.1	cytoadherence linked asexual protein 3.1
Pf3D7_03_v3	160437	161135	699	160664	151	8.72631	1.66714	7.79404	CSA_5mC_peak_542	PF3D7_0303000	NSF	N-ethylmaleimide-sensitive fusion protein
Pf3D7_03_v3	161253	161694	442	161500	182	28.8051	2.58681	27.4567	CSA_5mC_peak_543	PF3D7_0303000	NSF	N-ethylmaleimide-sensitive fusion protein
Pf3D7_03_v3	165441	165891	451	165720	202	23.0869	2.19289	21.8469	CSA_5mC_peak_544	PF3D7_0303100		CLP1 P-loop domain-containing protein, putative
Pf3D7_03_v3	166504	166847	344	166676	176	21.3944	2.24687	20.1868	CSA_5mC_peak_545	PF3D7_0303100		CLP1 P-loop domain-containing protein, putative
Pf3D7_03_v3	170130	171817	1688	171394	312	86.1624	3.87911	83.3943	CSA_5mC_peak_546	PF3D7_0303200		lipin, putative
Pf3D7_03_v3	172193	172556	364	172340	212	36.8149	2.74835	35.3137	CSA_5mC_peak_547	PF3D7_0303200		lipin, putative
Pf3D7_03_v3	175315	175583	269	175447	145	12.6618	1.92624	11.6359	CSA_5mC_peak_548	PF3D7_0303300	RPB6	DNA-directed RNA polymerases I, II, and III subunit RPABC2, putative
Pf3D7_03_v3	182796	183655	860	183345	246	57.4714	3.37441	55.4825	CSA_5mC_peak_549	PF3D7_0303500		spindle pole body protein, putative
Pf3D7_03_v3	186845	187629	785	187454	264	71.6063	3.80247	69.2417	CSA_5mC_peak_550	PF3D7_0303500		spindle pole body protein, putative
Pf3D7_03_v3	191932	192618	687	192233	231	42.9219	2.87525	41.2929	CSA_5mC_peak_551	PF3D7_0303700	BCKDH-E2	lipoamide acyltransferase component of branched-chain alpha-keto acid dehydrogenase complex
Pf3D7_03_v3	195536	195820	285	195670	167	20.2071	2.23712	19.0228	CSA_5mC_peak_552	PF3D7_0303800		IBR domain protein, putative
Pf3D7_03_v3	199315	199930	616	199658	208	40.9973	2.97707	39.4095	CSA_5mC_peak_553	PF3D7_0304000	IMC1a	inner membrane complex protein 1a, putative
Pf3D7_03_v3	204791	205275	485	204984	133	4.86126	1.45853	4.04555	CSA_5mC_peak_554	PF3D7_0304100	IMC1e	inner membrane complex protein 1e, putative
Pf3D7_03_v3	205836	206162	327	205970	120	8.18474	1.7409	7.26712	CSA_5mC_peak_555	PF3D7_0304100	IMC1e	inner membrane complex protein 1e, putative
Pf3D7_03_v3	207079	207433	355	207262	214	45.2952	3.12794	43.613	CSA_5mC_peak_556	PF3D7_0304200	EHD	EH domain-containing protein
Pf3D7_03_v3	215488	215845	358	215638	177	20.3257	2.18706	19.1395	CSA_5mC_peak_557	PF3D7_0304300		conserved Plasmodium protein, unknown function
Pf3D7_03_v3	216073	216300	228	216181	139	10.7199	1.83281	9.73825	CSA_5mC_peak_558	PF3D7_0304300		conserved Plasmodium protein, unknown function
Pf3D7_03_v3	221567	222371	805	221778	218	54.6154	3.54415	52.6995	CSA_5mC_peak_559	PF3D7_0304600	CSP	circumsporozoite (CS) protein
Pf3D7_03_v3	224151	225395	1245	224550	256	61.5943	3.45442	59.4994	CSA_5mC_peak_560	PF3D7_0304700		conserved Plasmodium protein, unknown function
Pf3D7_03_v3	226897	227133	237	226970	112	8.84925	1.82872	7.91354	CSA_5mC_peak_561	PF3D7_0304800		conserved Plasmodium membrane protein, unknown function
Pf3D7_03_v3	227188	227446	259	227298	127	13.3813	2.07147	12.3381	CSA_5mC_peak_562	PF3D7_0304800		conserved Plasmodium membrane protein, unknown function
Pf3D7_03_v3	232029	232346	318	232140	138	11.7729	1.90413	10.767	CSA_5mC_peak_563	PF3D7_0304900		conserved protein, unknown function
Pf3D7_03_v3	236466	236754	289	236617	153	14.4737	1.99499	13.4074	CSA_5mC_peak_564	PF3D7_0305100		conserved Plasmodium protein, unknown function
Pf3D7_03_v3	238562	239298	737	238980	233	46.9072	3.03134	45.1872	CSA_5mC_peak_565	PF3D7_0305100		conserved Plasmodium protein, unknown function
Pf3D7_03_v3	240175	240527	353	240367	121	5.71124	1.55233	4.86669	CSA_5mC_peak_566	PF3D7_0305100		conserved Plasmodium protein, unknown function
Pf3D7_03_v3	240645	240925	281	240770	142	9.23256	1.72735	8.28725	CSA_5mC_peak_567	PF3D7_0305100		conserved Plasmodium protein, unknown function
Pf3D7_03_v3	242843	243468	626	243320	174	20.0238	2.18778	18.8438	CSA_5mC_peak_568	PF3D7_0305100		conserved Plasmodium protein, unknown function
Pf3D7_03_v3	243994	246417	2424	245003	271	65.7101	3.48099	63.5052	CSA_5mC_peak_569	PF3D7_0305100		conserved Plasmodium protein, unknown function
Pf3D7_03_v3	252313	254455	2143	253683	284	66.2497	3.38545	64.0304	CSA_5mC_peak_570	PF3D7_0305200		GRIP domain-containing protein, putative
Pf3D7_03_v3	257247	257787	541	257519	293	82.1666	3.92256	79.508	CSA_5mC_peak_571	PF3D7_0305300		transporter, putative
Pf3D7_03_v3	259148	259480	333	259305	216	46.9143	3.1862	45.1939	CSA_5mC_peak_572	PF3D7_0305300		transporter, putative
Pf3D7_03_v3	261655	261882	228	261714	123	7.11925	1.65121	6.23182	CSA_5mC_peak_573	PF3D7_0305500		protein dopey homolog, putative
Pf3D7_03_v3	262070	262534	465	262317	222	35.6454	2.62715	34.1669	CSA_5mC_peak_574	PF3D7_0305500		protein dopey homolog, putative
Pf3D7_03_v3	264764	265334	571	264971	157	18.7797	2.21892	17.6248	CSA_5mC_peak_575	PF3D7_0305500		protein dopey homolog, putative
Pf3D7_03_v3	269181	269731	551	269557	238	49.3756	3.09611	47.5938	CSA_5mC_peak_576	PF3D7_0305500		protein dopey homolog, putative
Pf3D7_03_v3	270101	270442	342	270278	204	37.3319	2.83539	35.8197	CSA_5mC_peak_577	PF3D7_0305500		protein dopey homolog, putative
Pf3D7_03_v3	271107	272007	901	271394	211	43.9715	3.0929	42.3193	CSA_5mC_peak_578	PF3D7_0305500		protein dopey homolog, putative
Pf3D7_03_v3	273161	273434	274	273298	140	13.3142	1.99132	12.2726	CSA_5mC_peak_579	PF3D7_0305500		protein dopey homolog, putative
Pf3D7_03_v3	276600	277503	904	277098	237	44.5567	2.89937	42.8911	CSA_5mC_peak_580	PF3D7_0305600	APE1	DNA-(apurinic or apyrimidinic site) endonuclease
Pf3D7_03_v3	282175	282584	410	282404	249	58.4074	3.38591	56.3958	CSA_5mC_peak_581	PF3D7_0305800		P-loop containing nucleoside triphosphate hydrolase, putative
Pf3D7_03_v3	282988	283553	566	283240	266	71.7919	3.78785	69.4235	CSA_5mC_peak_582	PF3D7_0305800		P-loop containing nucleoside triphosphate hydrolase, putative
Pf3D7_03_v3	283717	284676	960	283964	257	68.6048	3.74971	66.3233	CSA_5mC_peak_583	PF3D7_0305800		P-loop containing nucleoside triphosphate hydrolase, putative
Pf3D7_03_v3	289253	289593	341	289442	153	10.5862	1.77052	9.60789	CSA_5mC_peak_584	PF3D7_0306100		conserved Plasmodium protein, unknown function
Pf3D7_03_v3	293930	294244	315	294086	152	17.1925	2.1579	16.0696	CSA_5mC_peak_585	PF3D7_0306200	AHA1	activator of Hsp90 ATPase
Pf3D7_03_v3	298546	298806	261	298727	117	8.92035	1.80901	7.98291	CSA_5mC_peak_586	PF3D7_0306400		FAD-dependent glycerol-3-phosphate dehydrogenase, putative
Pf3D7_03_v3	301543	301865	323	301749	137	12.0607	1.92734	11.0487	CSA_5mC_peak_587	PF3D7_0306500	COX6C	cytochrome c oxidase subunit 6c, putative
Pf3D7_03_v3	306170	307089	920	306548	170	17.9466	2.10105	16.8083	CSA_5mC_peak_588	PF3D7_0306800	CCT2	T-complex protein 1 subunit beta
Pf3D7_03_v3	315137	315652	516	315324	138	11.4888	1.88606	10.4889	CSA_5mC_peak_589	PF3D7_0307200		60S ribosomal protein L7, putative
Pf3D7_03_v3	319138	319530	393	319337	218	42.7411	2.97157	41.1162	CSA_5mC_peak_590	PF3D7_0307300	EB1	microtubule-associated protein RP/EB family, putative
Pf3D7_03_v3	321612	321997	386	321773	159	21.3024	2.34927	20.0971	CSA_5mC_peak_591	PF3D7_0307400	ClpP	ATP-dependent Clp protease proteolytic subunit
Pf3D7_03_v3	327604	328025	422	327802	140	14.3473	2.05611	13.2842	CSA_5mC_peak_592	PF3D7_0307600		conserved Plasmodium protein, unknown function
Pf3D7_03_v3	329685	330030	346	329834	167	20.9959	2.27956	19.7964	CSA_5mC_peak_593	PF3D7_0307700		conserved Plasmodium protein, unknown function
Pf3D7_03_v3	330446	331222	777	330789	151	19.9534	2.32736	18.7748	CSA_5mC_peak_594	PF3D7_0307700		conserved Plasmodium protein, unknown function
Pf3D7_03_v3	332024	332783	760	332324	159	18.4931	2.19062	17.344	CSA_5mC_peak_595	PF3D7_0307700		conserved Plasmodium protein, unknown function
Pf3D7_03_v3	333827	334472	646	334000	156	18.5903	2.21431	17.4394	CSA_5mC_peak_596	PF3D7_0307700		conserved Plasmodium protein, unknown function
Pf3D7_03_v3	337425	338095	671	337752	193	40.9237	3.11973	39.3376	CSA_5mC_peak_597	PF3D7_0307800		PDZ domain-containing protein, putative
Pf3D7_03_v3	341958	342309	352	342155	145	12.0267	1.88773	11.0157	CSA_5mC_peak_598	PF3D7_0307900		conserved Plasmodium protein, unknown function
Pf3D7_03_v3	343789	344736	948	344555	213	43.174	3.03596	41.5396	CSA_5mC_peak_599	PF3D7_0307900		conserved Plasmodium protein, unknown function
Pf3D7_03_v3	345187	345590	404	345400	205	39.9899	2.9552	38.4234	CSA_5mC_peak_600	PF3D7_0307900		conserved Plasmodium protein, unknown function
Pf3D7_03_v3	345811	346460	650	346185	224	49.9963	3.25306	48.1993	CSA_5mC_peak_601	PF3D7_0307900		conserved Plasmodium protein, unknown function
Pf3D7_03_v3	347867	348552	686	348116	197	40.1351	3.03768	38.5655	CSA_5mC_peak_602	PF3D7_0307900		conserved Plasmodium protein, unknown function
Pf3D7_03_v3	349132	350415	1284	349503	230	44.8337	2.96562	43.1621	CSA_5mC_peak_603	PF3D7_0307900		conserved Plasmodium protein, unknown function
Pf3D7_03_v3	351341	351664	324	351523	205	36.0451	2.76611	34.5588	CSA_5mC_peak_604	PF3D7_0307900		conserved Plasmodium protein, unknown function
Pf3D7_03_v3	353217	353913	697	353410	226	54.1964	3.43142	52.2915	CSA_5mC_peak_605	PF3D7_0308000		DNA polymerase delta small subunit, putative
Pf3D7_03_v3	354831	355193	363	355055	220	48.2834	3.21196	46.5296	CSA_5mC_peak_606	PF3D7_0308000		DNA polymerase delta small subunit, putative
Pf3D7_03_v3	357261	357575	315	357435	175	18.9168	2.12597	17.7593	CSA_5mC_peak_607	PF3D7_0308100		zinc finger protein, putative
Pf3D7_03_v3	358459	358778	320	358586	167	12.7828	1.84263	11.7531	CSA_5mC_peak_608	PF3D7_0308100		zinc finger protein, putative
Pf3D7_03_v3	360869	361352	484	361250	126	10.8872	1.90509	9.90169	CSA_5mC_peak_609	PF3D7_0308100		zinc finger protein, putative
Pf3D7_03_v3	363459	363766	308	363578	138	9.40741	1.75304	8.45748	CSA_5mC_peak_610	PF3D7_0308200	CCT7	T-complex protein 1 subunit eta
Pf3D7_03_v3	366359	366764	406	366550	173	28.3826	2.636	27.0421	CSA_5mC_peak_611	PF3D7_0308300	PIC4	PhIL1-interacting candidate PIC4
Pf3D7_03_v3	376328	376632	305	376466	152	13.89	1.96608	12.8358	CSA_5mC_peak_612	PF3D7_0308700		conserved protein, unknown function
Pf3D7_03_v3	379068	379303	236	379204	134	11.4717	1.90403	10.473	CSA_5mC_peak_613	PF3D7_0308900	SF3B1	splicing factor 3B subunit 1, putative
Pf3D7_03_v3	382313	383274	962	382604	238	54.1528	3.30565	52.2485	CSA_5mC_peak_614	PF3D7_0308900	SF3B1	splicing factor 3B subunit 1, putative
Pf3D7_03_v3	390329	390873	545	390623	275	63.6406	3.3623	61.4913	CSA_5mC_peak_615	PF3D7_0309200	ARK2	serine/threonine protein kinase ARK2, putative
Pf3D7_03_v3	390918	393781	2864	392156	225	44.2685	2.98171	42.6099	CSA_5mC_peak_616	PF3D7_0309200	ARK2	serine/threonine protein kinase ARK2, putative
Pf3D7_03_v3	397639	397986	348	397804	157	17.8188	2.1644	16.6835	CSA_5mC_peak_617	PF3D7_0309300		N2227-like protein, putative
Pf3D7_03_v3	398469	398730	262	398612	166	28.4822	2.70262	27.1393	CSA_5mC_peak_618	PF3D7_0309300		N2227-like protein, putative
Pf3D7_03_v3	407997	408364	368	408152	162	23.3455	2.44348	22.1009	CSA_5mC_peak_619	PF3D7_0309600	PfP2	60S acidic ribosomal protein P2
Pf3D7_03_v3	409605	410973	1369	410501	287	87.3357	4.2095	84.5363	CSA_5mC_peak_620	PF3D7_0309700	SBP2	SECIS-binding protein 2, putative
Pf3D7_03_v3	416406	416757	352	416616	138	15.1517	2.11904	14.0706	CSA_5mC_peak_621	PF3D7_0309900		conserved Plasmodium protein, unknown function
Pf3D7_03_v3	418154	418421	268	418271	149	14.3868	2.00985	13.3226	CSA_5mC_peak_622	PF3D7_0309900		conserved Plasmodium protein, unknown function
Pf3D7_03_v3	422398	423023	626	422593	196	23.2405	2.22906	21.9977	CSA_5mC_peak_623	PF3D7_0310100	CDPK3	calcium-dependent protein kinase 3
Pf3D7_03_v3	423516	423939	424	423833	126	7.38999	1.66025	6.49474	CSA_5mC_peak_624	PF3D7_0310100	CDPK3	calcium-dependent protein kinase 3
Pf3D7_03_v3	427649	427947	299	427843	151	20.2705	2.3463	19.0853	CSA_5mC_peak_625	PF3D7_0310200		phd finger protein, putative
Pf3D7_03_v3	428387	428884	498	428662	312	103.085	4.5537	99.821	CSA_5mC_peak_626	PF3D7_0310200		phd finger protein, putative
Pf3D7_03_v3	429487	429992	506	429690	236	45.2749	2.93722	43.5929	CSA_5mC_peak_627	PF3D7_0310200		phd finger protein, putative
Pf3D7_03_v3	430279	431404	1126	430965	297	85.314	4.00551	82.569	CSA_5mC_peak_628	PF3D7_0310200		phd finger protein, putative
Pf3D7_03_v3	431605	431930	326	431770	133	9.81035	1.79931	8.85067	CSA_5mC_peak_629	PF3D7_0310200		phd finger protein, putative
Pf3D7_03_v3	432394	432729	336	432570	187	22.3391	2.23321	21.1134	CSA_5mC_peak_630	PF3D7_0310200		phd finger protein, putative
Pf3D7_03_v3	433008	433661	654	433384	234	49.4782	3.13538	47.6946	CSA_5mC_peak_631	PF3D7_0310200		phd finger protein, putative
Pf3D7_03_v3	434610	434952	343	434799	146	17.6166	2.22104	16.4851	CSA_5mC_peak_632	PF3D7_0310200		phd finger protein, putative
Pf3D7_03_v3	435380	435678	299	435533	128	10.5948	1.87486	9.61621	CSA_5mC_peak_633	PF3D7_0310200		phd finger protein, putative
Pf3D7_03_v3	437368	438121	754	437988	162	16.0196	2.03776	14.9211	CSA_5mC_peak_634	PF3D7_0310200		phd finger protein, putative
Pf3D7_03_v3	438417	438671	255	438592	146	20.1853	2.37895	19.0015	CSA_5mC_peak_635	PF3D7_0310200		phd finger protein, putative
Pf3D7_03_v3	439131	439865	735	439394	182	35.2399	2.92734	33.7693	CSA_5mC_peak_636	PF3D7_0310200		phd finger protein, putative
Pf3D7_03_v3	442944	443240	297	443079	130	10.0669	1.82957	9.101	CSA_5mC_peak_637	PF3D7_0310300		phosphoglycerate mutase, putative
Pf3D7_03_v3	444057	444491	435	444261	261	66.9907	3.63474	64.7524	CSA_5mC_peak_638	PF3D7_0310300		phosphoglycerate mutase, putative
Pf3D7_03_v3	445229	445628	400	445429	138	8.48404	1.69333	7.55829	CSA_5mC_peak_639	PF3D7_0310300		phosphoglycerate mutase, putative
Pf3D7_03_v3	447869	448219	351	447996	170	23.7779	2.40958	22.5253	CSA_5mC_peak_640	PF3D7_0310400	PIESP1	parasite-infected erythrocyte surface protein
Pf3D7_03_v3	450320	451186	867	450543	277	74.297	3.77327	71.8594	CSA_5mC_peak_641	PF3D7_0310400	PIESP1	parasite-infected erythrocyte surface protein
Pf3D7_03_v3	452797	453056	260	452889	126	6.97396	1.63045	6.09105	CSA_5mC_peak_642	PF3D7_0310500	DHX57	ATP-dependent RNA helicase DHX57, putative
Pf3D7_03_v3	456715	457013	299	456885	142	10.9707	1.83586	9.98281	CSA_5mC_peak_643	PF3D7_0310500	DHX57	ATP-dependent RNA helicase DHX57, putative
Pf3D7_03_v3	457358	457937	580	457694	188	24.7166	2.34234	23.4453	CSA_5mC_peak_644	PF3D7_0310500	DHX57	ATP-dependent RNA helicase DHX57, putative
Pf3D7_03_v3	458551	458954	404	458873	128	8.54413	1.73393	7.61698	CSA_5mC_peak_645	PF3D7_0310500	DHX57	ATP-dependent RNA helicase DHX57, putative
Pf3D7_03_v3	467132	467551	420	467282	183	26.3581	2.45493	25.0556	CSA_5mC_peak_646	PF3D7_0310900		conserved Plasmodium protein, unknown function
Pf3D7_03_v3	471369	472053	685	471747	310	94.3835	4.22118	91.3782	CSA_5mC_peak_647	PF3D7_0311100		pre-mRNA splicing factor, putative
Pf3D7_03_v3	476719	477192	474	476904	238	50.2844	3.13541	48.4797	CSA_5mC_peak_648	PF3D7_0311200		valine--tRNA ligase, putative
Pf3D7_03_v3	477298	477595	298	477463	167	19.1622	2.18117	17.9997	CSA_5mC_peak_649	PF3D7_0311200		valine--tRNA ligase, putative
Pf3D7_03_v3	479768	480002	235	479879	134	14.5227	2.10355	13.455	CSA_5mC_peak_650	PF3D7_0311300		phosphatidylinositol 3- and 4-kinase, putative
Pf3D7_03_v3	480205	480698	494	480444	246	48.2354	2.98361	46.4824	CSA_5mC_peak_651	PF3D7_0311300		phosphatidylinositol 3- and 4-kinase, putative
Pf3D7_03_v3	485235	485484	250	485346	132	15.0621	2.15238	13.9835	CSA_5mC_peak_652	PF3D7_0311300		phosphatidylinositol 3- and 4-kinase, putative
Pf3D7_03_v3	489257	489889	633	489597	192	38.8327	3.01977	37.2901	CSA_5mC_peak_653	PF3D7_0311400	PKRP	kinase-related protein PKRP, putative
Pf3D7_03_v3	490728	495623	4896	494416	338	97.2876	4.0269	94.1964	CSA_5mC_peak_654	PF3D7_0311400	PKRP	kinase-related protein PKRP, putative
Pf3D7_03_v3	507240	507478	239	507352	120	11.1581	1.95745	10.1671	CSA_5mC_peak_655	PF3D7_0311800		ATP synthase F0 subunit d-like protein, putative
Pf3D7_03_v3	511159	511483	325	511313	136	11.7665	1.91337	10.761	CSA_5mC_peak_656	PF3D7_0311900		heptatricopeptide repeat-containing protein, putative
Pf3D7_03_v3	514955	515240	286	515115	151	15.6248	2.07205	14.5347	CSA_5mC_peak_657	PF3D7_0312100		E3 ubiquitin-protein ligase
Pf3D7_03_v3	516188	516497	310	516343	206	39.4352	2.91951	37.88	CSA_5mC_peak_658	PF3D7_0312100		E3 ubiquitin-protein ligase
Pf3D7_03_v3	518035	518451	417	518270	245	45.37	2.87444	43.6864	CSA_5mC_peak_659	PF3D7_0312200		tetratricopeptide repeat protein, putative
Pf3D7_03_v3	519041	519438	398	519274	207	37.4615	2.81708	35.9469	CSA_5mC_peak_660	PF3D7_0312200		tetratricopeptide repeat protein, putative
Pf3D7_03_v3	519868	520542	675	520324	256	63.1369	3.52058	61.0012	CSA_5mC_peak_661	PF3D7_0312200		tetratricopeptide repeat protein, putative
Pf3D7_03_v3	525737	526188	452	525970	189	39.2908	3.07483	37.7386	CSA_5mC_peak_662	PF3D7_0312400	GSK3	glycogen synthase kinase 3
Pf3D7_03_v3	526232	526460	229	526330	128	13.7109	2.08765	12.6606	CSA_5mC_peak_663	PF3D7_0312400	GSK3	glycogen synthase kinase 3
Pf3D7_03_v3	529904	530188	285	530053	165	17.327	2.09356	16.2015	CSA_5mC_peak_664	PF3D7_0312500	MFR3	multidrug-resistant modulator MFR3
Pf3D7_03_v3	531104	531421	318	531264	148	16.5469	2.14375	15.4373	CSA_5mC_peak_665	intergenic
Pf3D7_03_v3	535005	535260	256	535116	119	10.5589	1.91957	9.58201	CSA_5mC_peak_666	PF3D7_0312800		60S ribosomal protein L26, putative
Pf3D7_03_v3	536395	536734	340	536574	168	21.7728	2.31509	20.5577	CSA_5mC_peak_667	PF3D7_0312900		hypothetical protein
Pf3D7_03_v3	539844	540514	671	540037	261	65.1309	3.55503	62.9411	CSA_5mC_peak_668	PF3D7_0313100	HRD3	ubiquitin-protein ligase, putative
Pf3D7_03_v3	546087	546341	255	546203	135	10.9155	1.86303	9.9291	CSA_5mC_peak_669	PF3D7_0313400		conserved Plasmodium protein, unknown function
Pf3D7_03_v3	546762	547229	468	547009	251	57.9703	3.34795	55.9697	CSA_5mC_peak_670	PF3D7_0313400		conserved Plasmodium protein, unknown function
Pf3D7_03_v3	547316	547868	553	547617	297	77.3908	3.69321	74.873	CSA_5mC_peak_671	PF3D7_0313400		conserved Plasmodium protein, unknown function
Pf3D7_03_v3	549609	549857	249	549729	114	4.5239	1.47639	3.72034	CSA_5mC_peak_672	PF3D7_0313500	PfG	Ras-like G protein
Pf3D7_03_v3	549905	550755	851	550605	137	10.1384	1.80405	9.17081	CSA_5mC_peak_673	PF3D7_0313500	PfG	Ras-like G protein
Pf3D7_03_v3	551918	552735	818	552317	339	116.672	4.74851	112.906	CSA_5mC_peak_674	PF3D7_0313600		conserved Plasmodium protein, unknown function
Pf3D7_03_v3	552950	553282	333	553157	156	19.7664	2.2818	18.5918	CSA_5mC_peak_675	PF3D7_0313600		conserved Plasmodium protein, unknown function
Pf3D7_03_v3	553992	554659	668	554513	190	35.457	2.86322	33.982	CSA_5mC_peak_676	PF3D7_0313600		conserved Plasmodium protein, unknown function
Pf3D7_03_v3	559168	559400	233	559296	131	10.3423	1.84354	9.36974	CSA_5mC_peak_677	PF3D7_0313800		conserved Plasmodium protein, unknown function
Pf3D7_03_v3	562418	562664	247	562539	110	8.30613	1.79635	7.38488	CSA_5mC_peak_678	PF3D7_0313800		conserved Plasmodium protein, unknown function
Pf3D7_03_v3	565005	565390	386	565085	111	5.60066	1.57467	4.7594	CSA_5mC_peak_679	PF3D7_0313900		conserved Plasmodium protein, unknown function
Pf3D7_03_v3	572759	573239	481	572967	229	50.8587	3.2439	49.0395	CSA_5mC_peak_680	PF3D7_0314200		conserved Plasmodium protein, unknown function
Pf3D7_03_v3	579772	580446	675	580273	169	20.1506	2.22238	18.9681	CSA_5mC_peak_681	PF3D7_0314400	PPP6	serine/threonine protein phosphatase 6, putative
Pf3D7_03_v3	583586	583971	386	583788	231	62.0371	3.75453	59.93	CSA_5mC_peak_682	PF3D7_0314500		conserved Plasmodium protein, unknown function
Pf3D7_03_v3	585729	586015	287	585882	155	22.0378	2.42115	20.818	CSA_5mC_peak_683	PF3D7_0314500		conserved Plasmodium protein, unknown function
Pf3D7_03_v3	586557	586934	378	586734	194	35.5809	2.83409	34.1035	CSA_5mC_peak_684	PF3D7_0314600		conserved protein, unknown function
Pf3D7_03_v3	587154	587586	433	587374	121	9.62352	1.84109	8.66857	CSA_5mC_peak_685	PF3D7_0314600		conserved protein, unknown function
Pf3D7_03_v3	589893	590531	639	590175	324	104.584	4.45944	101.272	CSA_5mC_peak_686	PF3D7_0314700	RNF1	RING finger protein RNF1
Pf3D7_03_v3	590973	591956	984	591316	204	31.9314	2.58142	30.5242	CSA_5mC_peak_687	PF3D7_0314700	RNF1	RING finger protein RNF1
Pf3D7_03_v3	606215	607141	927	606650	281	72.3902	3.65368	70.0043	CSA_5mC_peak_688	PF3D7_0314800		conserved Plasmodium protein, unknown function
Pf3D7_03_v3	609402	609957	556	609584	193	27.9778	2.46846	26.6451	CSA_5mC_peak_689	PF3D7_0314900		conserved Plasmodium membrane protein, unknown function
Pf3D7_03_v3	615984	616220	237	616143	114	9.40724	1.86108	8.45743	CSA_5mC_peak_690	intergenic
Pf3D7_03_v3	617485	618112	628	617750	173	24.9624	2.45186	23.6868	CSA_5mC_peak_691	PF3D7_0315200	CTRP	circumsporozoite- and TRAP-related protein
Pf3D7_03_v3	618365	618804	440	618615	110	6.86876	1.68158	5.98875	CSA_5mC_peak_692	PF3D7_0315200	CTRP	circumsporozoite- and TRAP-related protein
Pf3D7_03_v3	619289	619641	353	619469	126	7.82468	1.69116	6.91685	CSA_5mC_peak_693	PF3D7_0315200	CTRP	circumsporozoite- and TRAP-related protein
Pf3D7_03_v3	620043	620853	811	620551	181	29.2683	2.61854	27.9109	CSA_5mC_peak_694	PF3D7_0315200	CTRP	circumsporozoite- and TRAP-related protein
Pf3D7_03_v3	621081	622964	1884	621298	212	41.5525	2.96808	39.9529	CSA_5mC_peak_695	PF3D7_0315200	CTRP	circumsporozoite- and TRAP-related protein
Pf3D7_03_v3	626100	627301	1202	626523	210	41.3461	2.97592	39.7507	CSA_5mC_peak_696	PF3D7_0315300		conserved Plasmodium protein, unknown function
Pf3D7_03_v3	628530	628885	356	628691	226	39.5039	2.76537	37.9475	CSA_5mC_peak_697	PF3D7_0315300		conserved Plasmodium protein, unknown function
Pf3D7_03_v3	629623	630263	641	630095	203	36.5333	2.80529	35.0373	CSA_5mC_peak_698	PF3D7_0315300		conserved Plasmodium protein, unknown function
Pf3D7_03_v3	633225	633603	379	633443	171	19.3524	2.16924	18.1861	CSA_5mC_peak_699	PF3D7_0315500		ribosomal protein L47, mitochondrial, putative
Pf3D7_03_v3	636605	637217	613	636894	330	110.572	4.62282	107.046	CSA_5mC_peak_700	PF3D7_0315600		zinc finger protein, putative
Pf3D7_03_v3	638186	638581	396	638387	209	49.643	3.39705	47.8552	CSA_5mC_peak_701	PF3D7_0315700		conserved Plasmodium membrane protein, unknown function
Pf3D7_03_v3	639647	640235	589	639812	198	30.008	2.53208	28.6367	CSA_5mC_peak_702	PF3D7_0315700		conserved Plasmodium membrane protein, unknown function
Pf3D7_03_v3	646444	646777	334	646558	133	15.3957	2.16776	14.3103	CSA_5mC_peak_703	PF3D7_0316000	MA	microneme associated antigen
Pf3D7_03_v3	647433	647707	275	647574	135	16.1091	2.20093	15.0081	CSA_5mC_peak_704	PF3D7_0316000	MA	microneme associated antigen
Pf3D7_03_v3	648742	649108	367	648892	112	7.35491	1.71188	6.46062	CSA_5mC_peak_705	PF3D7_0316100		ribosomal protein L27, mitochondrial, putative
Pf3D7_03_v3	649346	649848	503	649469	162	20.7682	2.29894	19.5732	CSA_5mC_peak_706	PF3D7_0316100		ribosomal protein L27, mitochondrial, putative
Pf3D7_03_v3	651686	652814	1129	652473	246	55.6548	3.29548	53.7119	CSA_5mC_peak_707	PF3D7_0316200		conserved Plasmodium protein, unknown function
Pf3D7_03_v3	654265	654725	461	654569	223	51.0906	3.31499	49.2658	CSA_5mC_peak_708	PF3D7_0316200		conserved Plasmodium protein, unknown function
Pf3D7_03_v3	654927	655288	362	655124	245	56.9365	3.36075	54.9611	CSA_5mC_peak_709	PF3D7_0316200		conserved Plasmodium protein, unknown function
Pf3D7_03_v3	656712	656991	280	656876	117	9.15209	1.82631	8.20874	CSA_5mC_peak_710	PF3D7_0316200		conserved Plasmodium protein, unknown function
Pf3D7_03_v3	658717	658993	277	658837	141	17.1917	2.22868	16.0689	CSA_5mC_peak_711	PF3D7_0316300	PPase	inorganic pyrophosphatase, putative
Pf3D7_03_v3	662496	663209	714	662661	196	24.4161	2.28324	23.151	CSA_5mC_peak_712	PF3D7_0316400		CS domain-containing protein, putative
Pf3D7_03_v3	663717	664803	1087	664189	273	63.2027	3.36256	61.0657	CSA_5mC_peak_713	PF3D7_0316400		CS domain-containing protein, putative
Pf3D7_03_v3	667682	668260	579	668053	221	43.5714	2.98397	41.928	CSA_5mC_peak_714	PF3D7_0316500	NUF2	kinetochore protein NUF2, putative
Pf3D7_03_v3	671218	671528	311	671376	185	37.3207	3.0101	35.8087	CSA_5mC_peak_715	PF3D7_0316600	FNT	formate-nitrite transporter
Pf3D7_03_v3	686048	686699	652	686419	193	36.8642	2.90819	35.3613	CSA_5mC_peak_716	PF3D7_0317100	B9	6-cysteine protein
Pf3D7_03_v3	688931	689337	407	689137	145	12.2853	1.90342	11.268	CSA_5mC_peak_717	PF3D7_0317100	B9	6-cysteine protein
Pf3D7_03_v3	690923	691921	999	691480	214	44.3691	3.08361	42.7083	CSA_5mC_peak_718	PF3D7_0317200	CRK4	cdc2-related protein kinase 4
Pf3D7_03_v3	692001	693263	1263	692621	233	50.5015	3.18987	48.692	CSA_5mC_peak_719	PF3D7_0317200	CRK4	cdc2-related protein kinase 4
Pf3D7_03_v3	694426	694899	474	694675	295	84.0975	3.97863	81.3855	CSA_5mC_peak_720	PF3D7_0317200	CRK4	cdc2-related protein kinase 4
Pf3D7_03_v3	695210	695538	329	695346	103	4.8242	1.5344	4.00948	CSA_5mC_peak_721	PF3D7_0317200	CRK4	cdc2-related protein kinase 4
Pf3D7_03_v3	699479	700941	1463	700152	235	59.6784	3.59169	57.6342	CSA_5mC_peak_722	PF3D7_0317300		conserved Plasmodium protein, unknown function
Pf3D7_03_v3	701079	701402	324	701253	157	18.1881	2.18533	17.0453	CSA_5mC_peak_723	PF3D7_0317300		conserved Plasmodium protein, unknown function
Pf3D7_03_v3	702985	703238	254	703133	130	8.48552	1.72217	7.55973	CSA_5mC_peak_724	PF3D7_0317300		conserved Plasmodium protein, unknown function
Pf3D7_03_v3	704441	704953	513	704799	162	13.2944	1.88918	12.2532	CSA_5mC_peak_725	PF3D7_0317300		conserved Plasmodium protein, unknown function
Pf3D7_03_v3	705441	706147	707	705907	227	44.6171	2.98061	42.9501	CSA_5mC_peak_726	PF3D7_0317300		conserved Plasmodium protein, unknown function
Pf3D7_03_v3	706334	706639	306	706446	156	18.8702	2.23034	17.7136	CSA_5mC_peak_727	PF3D7_0317300		conserved Plasmodium protein, unknown function
Pf3D7_03_v3	708979	709663	685	709280	235	41.9094	2.80339	40.3022	CSA_5mC_peak_728	PF3D7_0317300		conserved Plasmodium protein, unknown function
Pf3D7_03_v3	711699	712000	302	711922	117	10.2716	1.90963	9.30089	CSA_5mC_peak_729	PF3D7_0317400		DNA replication complex GINS protein, putative
Pf3D7_03_v3	713791	714133	343	713984	147	20.5737	2.39513	19.3822	CSA_5mC_peak_730	PF3D7_0317400		DNA replication complex GINS protein, putative
Pf3D7_03_v3	714631	715498	868	715321	246	70.9907	3.99728	68.6433	CSA_5mC_peak_731	intergenic
Pf3D7_03_v3	716051	716325	275	716144	114	8.78478	1.81353	7.8512	CSA_5mC_peak_732	intergenic
Pf3D7_03_v3	716493	716972	480	716669	143	11.5183	1.86544	10.5174	CSA_5mC_peak_733	PF3D7_0317500	EG5	kinesin-5
Pf3D7_03_v3	718686	719152	467	718968	228	43.2585	2.91287	41.6225	CSA_5mC_peak_734	PF3D7_0317500	EG5	kinesin-5
Pf3D7_03_v3	720366	721026	661	720916	120	7.49436	1.68991	6.59643	CSA_5mC_peak_735	PF3D7_0317500	EG5	kinesin-5
Pf3D7_03_v3	728621	728884	264	728783	111	7.57877	1.73397	6.67807	CSA_5mC_peak_736	PF3D7_0317700		CPSF (cleavage and polyadenylation specific factor), subunit A, putative
Pf3D7_03_v3	731419	732041	623	731599	149	18.015	2.22528	16.8753	CSA_5mC_peak_737	PF3D7_0317700		CPSF (cleavage and polyadenylation specific factor), subunit A, putative
Pf3D7_03_v3	732549	733277	729	732802	216	40.9831	2.90759	39.3956	CSA_5mC_peak_738	PF3D7_0317700		CPSF (cleavage and polyadenylation specific factor), subunit A, putative
Pf3D7_03_v3	733352	733631	280	733567	112	7.4601	1.72017	6.56313	CSA_5mC_peak_739	PF3D7_0317700		CPSF (cleavage and polyadenylation specific factor), subunit A, putative
Pf3D7_03_v3	733953	734312	360	734170	150	19.8246	2.32686	18.6482	CSA_5mC_peak_740	PF3D7_0317700		CPSF (cleavage and polyadenylation specific factor), subunit A, putative
Pf3D7_03_v3	734470	735086	617	734802	200	31.9422	2.60961	30.5349	CSA_5mC_peak_741	PF3D7_0317700		CPSF (cleavage and polyadenylation specific factor), subunit A, putative
Pf3D7_03_v3	735911	736159	249	736029	148	17.0315	2.17277	15.912	CSA_5mC_peak_742	PF3D7_0317700		CPSF (cleavage and polyadenylation specific factor), subunit A, putative
Pf3D7_03_v3	738039	738891	853	738714	176	27.1633	2.54661	25.8463	CSA_5mC_peak_743	PF3D7_0317700		CPSF (cleavage and polyadenylation specific factor), subunit A, putative
Pf3D7_03_v3	739581	739817	237	739718	129	12.8774	2.02464	11.8467	CSA_5mC_peak_744	PF3D7_0317900		conserved protein, unknown function
Pf3D7_03_v3	740471	740740	270	740583	147	10.5088	1.78775	9.53257	CSA_5mC_peak_745	PF3D7_0317900		conserved protein, unknown function
Pf3D7_03_v3	744509	744825	317	744665	158	12.1736	1.84282	11.1575	CSA_5mC_peak_746	PF3D7_0318100	STOML	stomatin-like protein, putative
Pf3D7_03_v3	748469	749369	901	749200	201	30.2878	2.52533	28.911	CSA_5mC_peak_747	PF3D7_0318200	RPB1	DNA-directed RNA polymerase II subunit RPB1
Pf3D7_03_v3	749560	749866	307	749737	117	6.14323	1.59815	5.28517	CSA_5mC_peak_748	PF3D7_0318200	RPB1	DNA-directed RNA polymerase II subunit RPB1
Pf3D7_03_v3	750928	751725	798	751096	155	13.8562	1.95025	12.8045	CSA_5mC_peak_749	PF3D7_0318200	RPB1	DNA-directed RNA polymerase II subunit RPB1
Pf3D7_03_v3	751819	752425	607	752222	188	26.0872	2.40895	24.79	CSA_5mC_peak_750	PF3D7_0318200	RPB1	DNA-directed RNA polymerase II subunit RPB1
Pf3D7_03_v3	753432	754185	754	753760	223	44.9019	3.02724	43.2283	CSA_5mC_peak_751	PF3D7_0318200	RPB1	DNA-directed RNA polymerase II subunit RPB1
Pf3D7_03_v3	754983	755543	561	755337	186	32.886	2.76547	31.4608	CSA_5mC_peak_752	PF3D7_0318200	RPB1	DNA-directed RNA polymerase II subunit RPB1
Pf3D7_03_v3	757856	758161	306	757996	146	11.0084	1.82182	10.0197	CSA_5mC_peak_753	PF3D7_0318300		conserved Plasmodium protein, unknown function
Pf3D7_03_v3	760204	760431	228	760299	128	13.7109	2.08765	12.6606	CSA_5mC_peak_754	PF3D7_0318300		conserved Plasmodium protein, unknown function
Pf3D7_03_v3	761593	761877	285	761736	186	27.9362	2.51353	26.6041	CSA_5mC_peak_755	PF3D7_0318400		coiled-coil domain-containing protein CCDC148/CCDC112, putative
Pf3D7_03_v3	762005	762646	642	762239	184	32.7037	2.77327	31.2817	CSA_5mC_peak_756	PF3D7_0318400		coiled-coil domain-containing protein CCDC148/CCDC112, putative
Pf3D7_03_v3	764705	764989	285	764846	146	16.225	2.13646	15.1221	CSA_5mC_peak_757	PF3D7_0318400		coiled-coil domain-containing protein CCDC148/CCDC112, putative
Pf3D7_03_v3	767993	768366	374	768139	164	18.0433	2.13748	16.9031	CSA_5mC_peak_758	PF3D7_0318500		conserved Plasmodium protein, unknown function
Pf3D7_03_v3	769273	769725	453	769520	225	44.5923	2.99619	42.9259	CSA_5mC_peak_759	PF3D7_0318500		conserved Plasmodium protein, unknown function
Pf3D7_03_v3	770480	770971	492	770789	143	13.5281	1.98892	12.4835	CSA_5mC_peak_760	PF3D7_0318500		conserved Plasmodium protein, unknown function
Pf3D7_03_v3	771591	772240	650	771801	220	41.8819	2.91574	40.2753	CSA_5mC_peak_761	PF3D7_0318500		conserved Plasmodium protein, unknown function
Pf3D7_03_v3	772885	773202	318	773068	165	21.635	2.32711	20.4232	CSA_5mC_peak_762	PF3D7_0318500		conserved Plasmodium protein, unknown function
Pf3D7_03_v3	773824	774075	252	773924	141	13.4595	1.99512	12.4155	CSA_5mC_peak_763	PF3D7_0318500		conserved Plasmodium protein, unknown function
Pf3D7_03_v3	775412	775893	482	775582	222	47.2109	3.14232	45.4831	CSA_5mC_peak_764	PF3D7_0318500		conserved Plasmodium protein, unknown function
Pf3D7_03_v3	776146	776952	807	776736	192	33.2837	2.73556	31.8507	CSA_5mC_peak_765	PF3D7_0318500		conserved Plasmodium protein, unknown function
Pf3D7_03_v3	777111	777618	508	777312	239	55.6532	3.36299	53.7104	CSA_5mC_peak_766	PF3D7_0318500		conserved Plasmodium protein, unknown function
Pf3D7_03_v3	777742	778188	447	777973	233	53.3744	3.31969	51.4917	CSA_5mC_peak_767	PF3D7_0318500		conserved Plasmodium protein, unknown function
Pf3D7_03_v3	778515	778906	392	778677	180	24.2133	2.36618	22.9515	CSA_5mC_peak_768	PF3D7_0318500		conserved Plasmodium protein, unknown function
Pf3D7_03_v3	779815	780718	904	780104	270	73.3692	3.81099	70.957	CSA_5mC_peak_769	PF3D7_0318500		conserved Plasmodium protein, unknown function
Pf3D7_03_v3	780905	781331	427	781090	204	32.4974	2.60759	31.0795	CSA_5mC_peak_770	PF3D7_0318500		conserved Plasmodium protein, unknown function
Pf3D7_03_v3	781627	782303	677	781847	182	23.5987	2.32304	22.3491	CSA_5mC_peak_771	PF3D7_0318500		conserved Plasmodium protein, unknown function
Pf3D7_03_v3	784094	784467	374	784263	210	30.2066	2.46548	28.8319	CSA_5mC_peak_772	PF3D7_0318600		cleavage and polyadenylation specificity factor, putative
Pf3D7_03_v3	785592	786100	509	785821	223	46.9593	3.12136	45.2377	CSA_5mC_peak_773	PF3D7_0318600		cleavage and polyadenylation specificity factor, putative
Pf3D7_03_v3	791810	792361	552	791967	224	45.5365	3.04732	43.8485	CSA_5mC_peak_774	PF3D7_0318900		conserved protein, unknown function
Pf3D7_03_v3	798639	799351	713	799231	135	8.15904	1.68217	7.24204	CSA_5mC_peak_775	PF3D7_0319000	ATPase7	P4-type ATPase ATP7, putative
Pf3D7_03_v3	805031	805829	799	805649	271	68.0311	3.57581	65.7646	CSA_5mC_peak_776	PF3D7_0319200	CCR4-4	CCR4 domain-containing protein 4, putative
Pf3D7_03_v3	810178	810555	378	810341	165	19.8776	2.23126	18.7003	CSA_5mC_peak_777	PF3D7_0319400		kinesin-8X
Pf3D7_03_v3	811614	811982	369	811761	165	14.3684	1.93499	13.305	CSA_5mC_peak_778	PF3D7_0319400		kinesin-8X
Pf3D7_03_v3	812680	813585	906	813324	218	50.286	3.32893	48.4813	CSA_5mC_peak_779	PF3D7_0319400		kinesin-8X
Pf3D7_03_v3	813945	814172	228	814010	121	7.08622	1.6559	6.19966	CSA_5mC_peak_780	PF3D7_0319400		kinesin-8X
Pf3D7_03_v3	816323	816888	566	816663	230	55.7757	3.46284	53.8293	CSA_5mC_peak_781	PF3D7_0319500		RNA-binding protein, putative
Pf3D7_03_v3	822101	822483	383	822277	235	47.3204	3.03264	45.59	CSA_5mC_peak_782	PF3D7_0319700	ABCI3	ABC transporter I family member 1, putative
Pf3D7_03_v3	826888	827249	362	827059	160	15.5792	2.0233	14.4897	CSA_5mC_peak_783	PF3D7_0319700	ABCI3	ABC transporter I family member 1, putative
Pf3D7_03_v3	829213	829733	521	829444	198	23.9565	2.25169	22.7002	CSA_5mC_peak_784	PF3D7_0319700	ABCI3	ABC transporter I family member 1, putative
Pf3D7_03_v3	832123	832713	591	832507	124	11.1928	1.93715	10.1998	CSA_5mC_peak_785	PF3D7_0319800		conserved Plasmodium protein, unknown function
Pf3D7_03_v3	833165	833499	335	833284	128	12.8712	2.03023	11.8405	CSA_5mC_peak_786	intergenic
Pf3D7_03_v3	835069	835350	282	835194	193	34.5581	2.79119	33.1004	CSA_5mC_peak_787	PF3D7_0319900		conserved protein, unknown function
Pf3D7_03_v3	840002	840314	313	840124	112	8.84925	1.82872	7.91354	CSA_5mC_peak_788	PF3D7_0320100	SEC22	protein transport protein SEC22
Pf3D7_03_v3	842612	843417	806	842854	305	84.6667	3.89355	81.9405	CSA_5mC_peak_789	PF3D7_0320200		CPW-WPC family protein
Pf3D7_03_v3	848987	849434	448	849183	188	28.9261	2.54874	27.5748	CSA_5mC_peak_790	PF3D7_0320400	Cap380	oocyst capsule protein Cap380
Pf3D7_03_v3	849744	850308	565	849977	185	25.8197	2.41486	24.5276	CSA_5mC_peak_791	PF3D7_0320400	Cap380	oocyst capsule protein Cap380
Pf3D7_03_v3	850695	851437	743	851268	145	13.4213	1.97226	12.3777	CSA_5mC_peak_792	PF3D7_0320400	Cap380	oocyst capsule protein Cap380
Pf3D7_03_v3	854505	854766	262	854615	128	6.24156	1.57151	5.38072	CSA_5mC_peak_793	PF3D7_0320400	Cap380	oocyst capsule protein Cap380
Pf3D7_03_v3	860866	861101	236	861016	116	9.97988	1.89345	9.01603	CSA_5mC_peak_794	PF3D7_0320500	Nico	nicotinamidase, putative
Pf3D7_03_v3	867939	868177	239	868016	125	12.732	2.0391	11.7029	CSA_5mC_peak_795	intergenic
Pf3D7_03_v3	870204	870485	282	870326	145	19.7998	2.36277	18.624	CSA_5mC_peak_796	PF3D7_0320800	DOZI	ATP-dependent RNA helicase DDX6
Pf3D7_03_v3	870905	871135	231	870995	114	7.3888	1.70605	6.49367	CSA_5mC_peak_797	PF3D7_0320800	DOZI	ATP-dependent RNA helicase DDX6
Pf3D7_03_v3	877940	879057	1118	878513	304	83.1845	3.84661	80.4965	CSA_5mC_peak_798	PF3D7_0321000		conserved protein, unknown function
Pf3D7_03_v3	879965	880554	590	880200	144	15.5509	2.1074	14.4617	CSA_5mC_peak_799	PF3D7_0321100		conserved Plasmodium protein, unknown function
Pf3D7_03_v3	880910	881653	744	881500	217	50.9829	3.37403	49.1612	CSA_5mC_peak_800	PF3D7_0321100		conserved Plasmodium protein, unknown function
Pf3D7_03_v3	884248	884763	516	884439	164	26.9827	2.63447	25.6687	CSA_5mC_peak_801	PF3D7_0321100		conserved Plasmodium protein, unknown function
Pf3D7_03_v3	890221	890492	272	890368	147	15.3212	2.07616	14.2376	CSA_5mC_peak_802	PF3D7_0321300		conserved Plasmodium protein, unknown function
Pf3D7_03_v3	891009	891776	768	891154	149	11.5638	1.84303	10.5617	CSA_5mC_peak_803	PF3D7_0321300		conserved Plasmodium protein, unknown function
Pf3D7_03_v3	892194	892784	591	892532	280	80.5301	4.00266	77.9177	CSA_5mC_peak_804	PF3D7_0321300		conserved Plasmodium protein, unknown function
Pf3D7_03_v3	898310	898685	376	898483	138	11.3701	1.87851	10.3733	CSA_5mC_peak_805	PF3D7_0321500		peptidase, putative
Pf3D7_03_v3	900793	901552	760	901220	209	42.7388	3.05209	41.1141	CSA_5mC_peak_806	PF3D7_0321600	DDX42	ATP-dependent RNA helicase DDX42, putative
Pf3D7_03_v3	902638	903120	483	902874	294	88.5882	4.17564	85.7521	CSA_5mC_peak_807	PF3D7_0321600	DDX42	ATP-dependent RNA helicase DDX42, putative
Pf3D7_03_v3	904453	904687	235	904509	121	10.5639	1.90887	9.58674	CSA_5mC_peak_808	PF3D7_0321700		conserved Plasmodium protein, unknown function
Pf3D7_03_v3	905112	906910	1799	906233	313	86.9625	3.8992	84.1724	CSA_5mC_peak_809	PF3D7_0321700		conserved Plasmodium protein, unknown function
Pf3D7_03_v3	907218	907668	451	907508	228	51.7465	3.29476	49.9048	CSA_5mC_peak_810	PF3D7_0321700		conserved Plasmodium protein, unknown function
Pf3D7_03_v3	908311	908725	415	908530	154	19.0358	2.25273	17.8759	CSA_5mC_peak_811	PF3D7_0321700		conserved Plasmodium protein, unknown function
Pf3D7_03_v3	909205	909510	306	909369	175	29.678	2.68964	28.313	CSA_5mC_peak_812	PF3D7_0321700		conserved Plasmodium protein, unknown function
Pf3D7_03_v3	912921	913420	500	913076	181	28.7668	2.59247	27.4189	CSA_5mC_peak_813	PF3D7_0321800		WD repeat-containing protein, putative
Pf3D7_03_v3	913670	914039	370	913846	204	31.0448	2.54063	29.6542	CSA_5mC_peak_814	PF3D7_0321800		WD repeat-containing protein, putative
Pf3D7_03_v3	915873	916333	461	916081	216	40.0471	2.86476	38.4793	CSA_5mC_peak_815	PF3D7_0321800		WD repeat-containing protein, putative
Pf3D7_03_v3	916996	918592	1597	917919	232	49.9909	3.17623	48.1942	CSA_5mC_peak_816	PF3D7_0321800		WD repeat-containing protein, putative
Pf3D7_03_v3	919817	920116	300	919959	130	8.021	1.6903	7.10825	CSA_5mC_peak_817	PF3D7_0321800		WD repeat-containing protein, putative
Pf3D7_03_v3	920471	921001	531	920837	255	66.0442	3.65827	63.8307	CSA_5mC_peak_818	PF3D7_0321800		WD repeat-containing protein, putative
Pf3D7_03_v3	923918	924289	372	924119	202	31.1816	2.5602	29.7878	CSA_5mC_peak_819	PF3D7_0321900	CARL	cyclic amine resistance locus protein
Pf3D7_03_v3	924604	924952	349	924741	129	6.08206	1.55717	5.2256	CSA_5mC_peak_820	PF3D7_0321900	CARL	cyclic amine resistance locus protein
Pf3D7_03_v3	930809	931122	314	930989	134	7.97262	1.6731	7.06106	CSA_5mC_peak_821	PF3D7_0322100	Prt1	mRNA-capping enzyme subunit beta
Pf3D7_03_v3	935580	936607	1028	936461	184	36.4574	2.97347	34.9627	CSA_5mC_peak_822	PF3D7_0322200		conserved protein, unknown function
Pf3D7_03_v3	937908	938302	395	938146	147	17.1915	2.18871	16.0686	CSA_5mC_peak_823	PF3D7_0322300	DGAT	diacylglycerol O-acyltransferase
Pf3D7_03_v3	939522	939831	310	939712	123	5.94034	1.56387	5.08865	CSA_5mC_peak_824	PF3D7_0322300	DGAT	diacylglycerol O-acyltransferase
Pf3D7_03_v3	942733	943482	750	943277	197	28.6642	2.47532	27.3181	CSA_5mC_peak_825	PF3D7_0322400		regulator of initiation factor 2 (eIF2)
Pf3D7_03_v3	943717	944530	814	944280	174	32.0961	2.83208	30.6853	CSA_5mC_peak_826	PF3D7_0322400		regulator of initiation factor 2 (eIF2)
Pf3D7_03_v3	945830	946204	375	946008	215	39.5441	2.84977	37.9867	CSA_5mC_peak_827	PF3D7_0322500	IscA2	iron-sulfur assembly protein, putative
Pf3D7_03_v3	948357	949311	955	948627	244	58.8502	3.45546	56.8273	CSA_5mC_peak_828	PF3D7_0322600		conserved Plasmodium protein, unknown function
Pf3D7_03_v3	950586	951802	1217	951041	190	30.0823	2.59164	28.7096	CSA_5mC_peak_829	PF3D7_0322600		conserved Plasmodium protein, unknown function
Pf3D7_03_v3	959774	960611	838	959970	156	24.1971	2.54078	22.9358	CSA_5mC_peak_830	PF3D7_0322700		conserved Plasmodium protein, unknown function
Pf3D7_03_v3	966307	966550	244	966441	133	15.3957	2.16776	14.3103	CSA_5mC_peak_831	PF3D7_0322900	RPS3A	40S ribosomal protein S3A, putative
Pf3D7_03_v3	971251	972899	1649	971830	264	66.0136	3.56195	63.8009	CSA_5mC_peak_832	PF3D7_0323100		conserved Plasmodium protein, unknown function
Pf3D7_03_v3	973150	973601	452	973343	164	15.3693	1.9931	14.2847	CSA_5mC_peak_833	PF3D7_0323100		conserved Plasmodium protein, unknown function
Pf3D7_03_v3	974491	974904	414	974696	143	13.1755	1.96727	12.1381	CSA_5mC_peak_834	PF3D7_0323100		conserved Plasmodium protein, unknown function
Pf3D7_03_v3	975183	975513	331	975293	128	8.78947	1.75091	7.85581	CSA_5mC_peak_835	PF3D7_0323100		conserved Plasmodium protein, unknown function
Pf3D7_03_v3	977017	977324	308	977127	129	11.5855	1.93713	10.583	CSA_5mC_peak_836	PF3D7_0323200		conserved Plasmodium protein, unknown function
Pf3D7_03_v3	977398	977685	288	977562	144	14.532	2.04507	13.464	CSA_5mC_peak_837	PF3D7_0323200		conserved Plasmodium protein, unknown function
Pf3D7_03_v3	981358	981760	403	981570	185	22.0106	2.22795	20.7915	CSA_5mC_peak_838	PF3D7_0323400	RIPR	Rh5 interacting protein
Pf3D7_03_v3	986408	986961	554	986501	141	14.7498	2.07552	13.6784	CSA_5mC_peak_839	PF3D7_0323500	SMN	survival motor neuron-like protein
Pf3D7_03_v3	987230	987987	758	987391	148	18.965	2.28929	17.8067	CSA_5mC_peak_840	PF3D7_0323500	SMN	survival motor neuron-like protein
Pf3D7_03_v3	989111	989432	322	989235	167	17.3012	2.08208	16.1762	CSA_5mC_peak_841	PF3D7_0323600		BSD domain-containing protein, putative
Pf3D7_03_v3	991563	992958	1396	992755	228	56.6671	3.52795	54.6994	CSA_5mC_peak_842	PF3D7_0323700	SART1	U4/U6.U5 tri-snRNP-associated protein 1, putative
Pf3D7_03_v3	993072	993690	619	993469	283	91.4844	4.44734	88.565	CSA_5mC_peak_843	PF3D7_0323700	SART1	U4/U6.U5 tri-snRNP-associated protein 1, putative
Pf3D7_03_v3	998670	999173	504	998967	164	20.4572	2.26898	19.2686	CSA_5mC_peak_844	PF3D7_0323800		conserved Plasmodium protein, unknown function
Pf3D7_03_v3	999722	999996	275	999828	106	4.1602	1.46577	3.36956	CSA_5mC_peak_845	PF3D7_0323800		conserved Plasmodium protein, unknown function
Pf3D7_03_v3	1016277	1016518	242	1016335	96	4.74981	1.55165	3.93743	CSA_5mC_peak_846	PF3D7_0324400	RIF	rifin
Pf3D7_03_v3	1019194	1019632	439	1019372	182	35.8673	2.96155	34.3844	CSA_5mC_peak_847	PF3D7_0324500	RIF	rifin
Pf3D7_03_v3	1030597	1031347	751	1030755	147	20.5737	2.39513	19.3822	CSA_5mC_peak_848	PF3D7_0324900	VAR	erythrocyte membrane protein 1, PfEMP1
Pf3D7_03_v3	1032278	1035197	2920	1033263	250	68.8329	3.8432	66.546	CSA_5mC_peak_849	PF3D7_0324900	VAR	erythrocyte membrane protein 1, PfEMP1
Pf3D7_03_v3	1035420	1036506	1087	1036284	216	41.1829	2.91677	39.5914	CSA_5mC_peak_850	PF3D7_0324900	VAR	erythrocyte membrane protein 1, PfEMP1
Pf3D7_03_v3	1036996	1038024	1029	1037279	198	30.008	2.53208	28.6367	CSA_5mC_peak_851	PF3D7_0324900	VAR	erythrocyte membrane protein 1, PfEMP1
Pf3D7_03_v3	1039816	1040099	284	1039992	130	13.9043	2.08789	12.8497	CSA_5mC_peak_852	intergenic
Pf3D7_03_v3	1043108	1043396	289	1043255	152	20.3808	2.34558	19.1935	CSA_5mC_peak_853	intergenic
Pf3D7_03_v3	1044427	1044735	309	1044569	118	6.92266	1.65455	6.04122	CSA_5mC_peak_854	intergenic
Pf3D7_03_v3	1045935	1046218	284	1046127	109	3.1269	1.36326	2.37835	CSA_5mC_peak_855	intergenic
Pf3D7_03_v3	1051105	1055051	3947	1051358	253	63.9461	3.5872	61.7876	CSA_5mC_peak_856	intergenic
Pf3D7_03_v3	1057366	1058136	771	1057794	129	10.653	1.87393	9.67285	CSA_5mC_peak_857	intergenic
Pf3D7_03_v3	1058493	1059619	1127	1058822	207	43.7328	3.12015	42.0863	CSA_5mC_peak_858	intergenic
Pf3D7_03_v3	1059683	1063367	3685	1062550	273	79.9985	4.06485	77.4021	CSA_5mC_peak_859	intergenic
Pf3D7_04_v3	5772	6052	281	5872	130	11.5989	1.93275	10.5963	CSA_5mC_peak_860	intergenic
Pf3D7_04_v3	8361	10673	2313	9776	242	58.5567	3.46303	56.5413	CSA_5mC_peak_861	intergenic
Pf3D7_04_v3	12274	12542	269	12412	118	6.20364	1.59952	5.34383	CSA_5mC_peak_862	intergenic
Pf3D7_04_v3	13665	14144	480	14082	116	4.89774	1.50207	4.0807	CSA_5mC_peak_863	intergenic
Pf3D7_04_v3	14910	15607	698	15125	128	7.86093	1.6864	6.95216	CSA_5mC_peak_864	intergenic
Pf3D7_04_v3	16753	17131	379	16938	111	6.95173	1.68411	6.06951	CSA_5mC_peak_865	intergenic
Pf3D7_04_v3	19594	19995	402	19777	118	8.4918	1.77237	7.56594	CSA_5mC_peak_866	intergenic
Pf3D7_04_v3	20249	20636	388	20447	171	26.5392	2.55166	25.2335	CSA_5mC_peak_867	intergenic
Pf3D7_04_v3	22406	22725	320	22507	120	7.05971	1.65755	6.17375	CSA_5mC_peak_868	intergenic
Pf3D7_04_v3	23039	23309	271	23132	109	7.07505	1.70249	6.18888	CSA_5mC_peak_869	intergenic
Pf3D7_04_v3	26881	27194	314	27019	129	13.0161	2.03404	11.9811	CSA_5mC_peak_870	intergenic
Pf3D7_04_v3	28636	31631	2996	29445	221	45.4615	3.07052	43.7748	CSA_5mC_peak_871	PF3D7_0400100	VAR	erythrocyte membrane protein 1, PfEMP1
Pf3D7_04_v3	31851	32196	346	32019	126	10.0323	1.84579	9.06727	CSA_5mC_peak_872	PF3D7_0400100	VAR	erythrocyte membrane protein 1, PfEMP1
Pf3D7_04_v3	32934	33570	637	33083	161	16.6954	2.07979	15.5829	CSA_5mC_peak_873	PF3D7_0400100	VAR	erythrocyte membrane protein 1, PfEMP1
Pf3D7_04_v3	33623	35635	2013	33870	254	60.5061	3.42754	58.4399	CSA_5mC_peak_874	PF3D7_0400100	VAR	erythrocyte membrane protein 1, PfEMP1
Pf3D7_04_v3	35675	36266	592	36042	199	44.3733	3.23667	42.7116	CSA_5mC_peak_875	PF3D7_0400100	VAR	erythrocyte membrane protein 1, PfEMP1
Pf3D7_04_v3	38349	38934	586	38530	261	80.3381	4.24004	77.7312	CSA_5mC_peak_876	intergenic
Pf3D7_04_v3	42466	42785	320	42625	150	16.6403	2.13736	15.529	CSA_5mC_peak_877	PF3D7_0400300	RIF	rifin
Pf3D7_04_v3	45695	46027	333	45859	179	27.4416	2.5387	26.119	CSA_5mC_peak_878	PF3D7_0400400	VAR	erythrocyte membrane protein 1, PfEMP1
Pf3D7_04_v3	46932	48716	1785	48038	176	29.6845	2.68145	28.3194	CSA_5mC_peak_879	PF3D7_0400400	VAR	erythrocyte membrane protein 1, PfEMP1
Pf3D7_04_v3	49099	50030	932	49254	166	25.9154	2.55703	24.6212	CSA_5mC_peak_880	PF3D7_0400400	VAR	erythrocyte membrane protein 1, PfEMP1
Pf3D7_04_v3	50568	50998	431	50746	136	15.8891	2.17964	14.7931	CSA_5mC_peak_881	PF3D7_0400400	VAR	erythrocyte membrane protein 1, PfEMP1
Pf3D7_04_v3	51637	51949	313	51810	110	6.46979	1.64931	5.60191	CSA_5mC_peak_882	PF3D7_0400400	VAR	erythrocyte membrane protein 1, PfEMP1
Pf3D7_04_v3	52132	53307	1176	52702	205	37.2223	2.82194	35.7128	CSA_5mC_peak_883	PF3D7_0400400	VAR	erythrocyte membrane protein 1, PfEMP1
Pf3D7_04_v3	53401	54678	1278	53682	220	49.3042	3.26059	47.5246	CSA_5mC_peak_884	PF3D7_0400400	VAR	erythrocyte membrane protein 1, PfEMP1
Pf3D7_04_v3	54912	56852	1941	56229	193	28.9076	2.51316	27.5572	CSA_5mC_peak_885	PF3D7_0400400	VAR	erythrocyte membrane protein 1, PfEMP1
Pf3D7_04_v3	63585	64003	419	63794	190	37.2438	2.95615	35.734	CSA_5mC_peak_886	PF3D7_0400700	RIF	rifin
Pf3D7_04_v3	73601	73996	396	73810	207	39.1751	2.89841	37.6258	CSA_5mC_peak_887	PF3D7_0401000	RIF	rifin
Pf3D7_04_v3	79625	79909	285	79763	134	14.6557	2.11228	13.5859	CSA_5mC_peak_888	PF3D7_0401200	RIF	rifin
Pf3D7_04_v3	82797	83052	256	82914	150	14.4883	2.01075	13.4214	CSA_5mC_peak_889	PF3D7_0401300	RIF	rifin
Pf3D7_04_v3	85653	85887	235	85770	127	9.77485	1.82328	8.81603	CSA_5mC_peak_890	PF3D7_0401400	RIF	rifin
Pf3D7_04_v3	85939	86403	465	86069	118	6.2717	1.60476	5.40999	CSA_5mC_peak_891	PF3D7_0401400	RIF	rifin
Pf3D7_04_v3	89322	89627	306	89461	173	24.4494	2.42463	23.1836	CSA_5mC_peak_892	intergenic
Pf3D7_04_v3	92831	93519	689	93315	291	83.2529	3.98918	80.5634	CSA_5mC_peak_893	PF3D7_0401600	RIF	rifin
Pf3D7_04_v3	100899	101603	705	101269	234	42.0151	2.81489	40.4057	CSA_5mC_peak_894	intergenic
Pf3D7_04_v3	104263	104805	543	104462	186	37.7889	3.02515	36.2682	CSA_5mC_peak_895	PF3D7_0401800	PfD80	Plasmodium exported protein (PHISTb), unknown function
Pf3D7_04_v3	108042	109278	1237	108850	281	93.3757	4.5637	90.3991	CSA_5mC_peak_896	PF3D7_0401900	ACS6	acyl-CoA synthetase
Pf3D7_04_v3	110270	111113	844	110568	280	81.2146	4.03205	78.5821	CSA_5mC_peak_897	PF3D7_0401900	ACS6	acyl-CoA synthetase
Pf3D7_04_v3	115244	115699	456	115515	243	53.9412	3.24915	52.0431	CSA_5mC_peak_898	PF3D7_0402000		Plasmodium exported protein (PHISTa), unknown function
Pf3D7_04_v3	124027	124455	429	124254	197	27.7577	2.4328	26.4287	CSA_5mC_peak_899	PF3D7_0402100		Plasmodium exported protein (PHISTb), unknown function
Pf3D7_04_v3	124563	125079	517	124831	162	18.0809	2.15052	16.94	CSA_5mC_peak_900	PF3D7_0402100		Plasmodium exported protein (PHISTb), unknown function
Pf3D7_04_v3	126950	127218	269	127004	116	8.46771	1.77976	7.54244	CSA_5mC_peak_901	intergenic
Pf3D7_04_v3	127466	130958	3493	128268	237	45.476	2.938	43.7892	CSA_5mC_peak_902	intergenic
Pf3D7_04_v3	131119	132000	882	131731	238	57.8607	3.47357	55.863	CSA_5mC_peak_903	intergenic
Pf3D7_04_v3	132893	133648	756	133157	215	45.952	3.14979	44.2539	CSA_5mC_peak_904	intergenic
Pf3D7_04_v3	133743	134174	432	134106	108	4.3692	1.479	3.57071	CSA_5mC_peak_905	intergenic
Pf3D7_04_v3	134354	134629	276	134488	125	9.7561	1.83126	8.79765	CSA_5mC_peak_906	intergenic
Pf3D7_04_v3	139411	140178	768	139732	237	51.1523	3.18217	49.3264	CSA_5mC_peak_907	PF3D7_0402300	RH1	reticulocyte binding protein homologue 1
Pf3D7_04_v3	140361	140702	342	140524	155	11.6191	1.82282	10.6161	CSA_5mC_peak_908	PF3D7_0402300	RH1	reticulocyte binding protein homologue 1
Pf3D7_04_v3	141131	142060	930	141290	172	23.5583	2.38422	22.3095	CSA_5mC_peak_909	PF3D7_0402300	RH1	reticulocyte binding protein homologue 1
Pf3D7_04_v3	142837	143148	312	143013	153	12.1343	1.86022	11.1188	CSA_5mC_peak_910	PF3D7_0402300	RH1	reticulocyte binding protein homologue 1
Pf3D7_04_v3	143382	143648	267	143568	125	5.6307	1.53496	4.78859	CSA_5mC_peak_911	PF3D7_0402300	RH1	reticulocyte binding protein homologue 1
Pf3D7_04_v3	144272	144808	537	144648	143	10.5552	1.80604	9.57837	CSA_5mC_peak_912	PF3D7_0402300	RH1	reticulocyte binding protein homologue 1
Pf3D7_04_v3	145799	146510	712	146186	225	47.4575	3.12585	45.7241	CSA_5mC_peak_913	PF3D7_0402300	RH1	reticulocyte binding protein homologue 1
Pf3D7_04_v3	147741	148192	452	147852	153	16.8135	2.13	15.6987	CSA_5mC_peak_914	PF3D7_0402400	GEXP18	Plasmodium exported protein, unknown function
Pf3D7_04_v3	163015	163334	320	163232	109	5.14509	1.54309	4.31969	CSA_5mC_peak_915	intergenic
Pf3D7_04_v3	165711	166018	308	165867	218	39.2154	2.81156	37.6649	CSA_5mC_peak_916	intergenic
Pf3D7_04_v3	167378	168736	1359	168168	186	33.1636	2.77988	31.7328	CSA_5mC_peak_917	intergenic
Pf3D7_04_v3	169217	169853	637	169374	180	27.9223	2.55623	26.5907	CSA_5mC_peak_918	intergenic
Pf3D7_04_v3	170450	170751	302	170639	121	10.0415	1.87125	9.07625	CSA_5mC_peak_919	intergenic
Pf3D7_04_v3	175858	176122	265	175969	118	6.87452	1.65089	5.9943	CSA_5mC_peak_920	PF3D7_0403100		regulator of chromosome condensation, putative
Pf3D7_04_v3	178466	180233	1768	179746	318	82.7813	3.69723	80.1054	CSA_5mC_peak_921	PF3D7_0403200		pre-mRNA splicing factor, putative
Pf3D7_04_v3	184236	184811	576	184379	156	19.3673	2.25885	18.2008	CSA_5mC_peak_922	PF3D7_0403400		conserved Plasmodium protein, unknown function
Pf3D7_04_v3	189410	189960	551	189652	278	63.7806	3.34193	61.6279	CSA_5mC_peak_923	PF3D7_0403400		conserved Plasmodium protein, unknown function
Pf3D7_04_v3	197689	197960	272	197893	107	7.51986	1.7478	6.62067	CSA_5mC_peak_924	PF3D7_0403600		conserved Plasmodium protein, unknown function
Pf3D7_04_v3	198575	199509	935	199154	181	30.8228	2.70001	29.4361	CSA_5mC_peak_925	PF3D7_0403600		conserved Plasmodium protein, unknown function
Pf3D7_04_v3	206094	206713	620	206474	255	76.5534	4.14293	74.0581	CSA_5mC_peak_926	PF3D7_0403700	CLF1	pre-mRNA-splicing factor CLF1, putative
Pf3D7_04_v3	208573	209230	658	209047	210	50.2125	3.41468	48.4092	CSA_5mC_peak_927	PF3D7_0403700	CLF1	pre-mRNA-splicing factor CLF1, putative
Pf3D7_04_v3	210397	210710	314	210546	138	17.1844	2.24948	16.0616	CSA_5mC_peak_928	PF3D7_0403800		alpha/beta hydrolase, putative
Pf3D7_04_v3	212915	213192	278	213017	143	9.71982	1.75424	8.76221	CSA_5mC_peak_929	PF3D7_0403800		alpha/beta hydrolase, putative
Pf3D7_04_v3	220252	220791	540	220478	257	62.0583	3.46435	59.9505	CSA_5mC_peak_930	PF3D7_0403900	SET8	SET domain protein, putative
Pf3D7_04_v3	222435	222829	395	222659	136	9.62337	1.77476	8.66842	CSA_5mC_peak_931	PF3D7_0403900	SET8	SET domain protein, putative
Pf3D7_04_v3	223902	224249	348	224090	206	45.8189	3.23509	44.1245	CSA_5mC_peak_932	PF3D7_0404000		conserved Plasmodium protein, unknown function
Pf3D7_04_v3	227785	228447	663	227977	202	32.1677	2.60615	30.7556	CSA_5mC_peak_933	PF3D7_0404100	ApiAP2	AP2 domain transcription factor AP2-SP2, putative
Pf3D7_04_v3	228788	229334	547	229121	287	74.1229	3.66334	71.6898	CSA_5mC_peak_934	PF3D7_0404100	ApiAP2	AP2 domain transcription factor AP2-SP2, putative
Pf3D7_04_v3	230744	231580	837	231090	241	46.449	2.9481	44.7397	CSA_5mC_peak_935	PF3D7_0404100	ApiAP2	AP2 domain transcription factor AP2-SP2, putative
Pf3D7_04_v3	234977	236353	1377	236102	285	91.6467	4.42648	88.7223	CSA_5mC_peak_936	PF3D7_0404300		conserved Plasmodium protein, unknown function
Pf3D7_04_v3	239107	239509	403	239390	199	25.5249	2.31801	24.2382	CSA_5mC_peak_937	PF3D7_0404400	P36	6-cysteine protein P36
Pf3D7_04_v3	247699	248049	351	247864	191	32.0429	2.68151	30.6336	CSA_5mC_peak_938	PF3D7_0404600		conserved Plasmodium membrane protein, unknown function
Pf3D7_04_v3	250232	250556	325	250411	143	15.8049	2.12905	14.7102	CSA_5mC_peak_939	PF3D7_0404600		conserved Plasmodium membrane protein, unknown function
Pf3D7_04_v3	251600	251846	247	251747	129	10.8254	1.88563	9.84192	CSA_5mC_peak_940	PF3D7_0404600		conserved Plasmodium membrane protein, unknown function
Pf3D7_04_v3	253933	254396	464	254145	222	44.414	3.01372	42.7516	CSA_5mC_peak_941	PF3D7_0404600		conserved Plasmodium membrane protein, unknown function
Pf3D7_04_v3	254860	255130	271	255010	141	11.909	1.89861	10.8993	CSA_5mC_peak_942	PF3D7_0404600		conserved Plasmodium membrane protein, unknown function
Pf3D7_04_v3	255428	256322	895	255621	301	82.2896	3.84265	79.6264	CSA_5mC_peak_943	PF3D7_0404600		conserved Plasmodium membrane protein, unknown function
Pf3D7_04_v3	256819	257062	244	256972	112	5.18396	1.53707	4.35676	CSA_5mC_peak_944	PF3D7_0404600		conserved Plasmodium membrane protein, unknown function
Pf3D7_04_v3	258310	258638	329	258422	144	8.81314	1.69428	7.87885	CSA_5mC_peak_945	PF3D7_0404600		conserved Plasmodium membrane protein, unknown function
Pf3D7_04_v3	260526	261020	495	260710	203	41.0566	3.02614	39.468	CSA_5mC_peak_946	PF3D7_0404700	DPAP3	dipeptidyl aminopeptidase 3
Pf3D7_04_v3	262326	262979	654	262562	228	42.1071	2.86287	40.496	CSA_5mC_peak_947	PF3D7_0404700	DPAP3	dipeptidyl aminopeptidase 3
Pf3D7_04_v3	263242	263616	375	263515	163	21.5558	2.33607	20.3456	CSA_5mC_peak_948	PF3D7_0404700	DPAP3	dipeptidyl aminopeptidase 3
Pf3D7_04_v3	265328	266096	769	265853	246	53.4186	3.19975	51.535	CSA_5mC_peak_949	PF3D7_0404800		sporozoite-specific protein S10, putative
Pf3D7_04_v3	269591	269885	295	269702	130	12.5054	1.99369	11.4822	CSA_5mC_peak_950	PF3D7_0405000	DDX51	ATP-dependent RNA helicase DDX51, putative
Pf3D7_04_v3	270700	271144	445	270919	190	28.6265	2.51994	27.281	CSA_5mC_peak_951	PF3D7_0405000	DDX51	ATP-dependent RNA helicase DDX51, putative
Pf3D7_04_v3	274011	274309	299	274099	136	9.87288	1.79098	8.91173	CSA_5mC_peak_952	PF3D7_0405100	SEC24B	protein transport protein Sec24B, putative
Pf3D7_04_v3	275394	276013	620	275829	214	37.4618	2.76279	35.9472	CSA_5mC_peak_953	PF3D7_0405100	SEC24B	protein transport protein Sec24B, putative
Pf3D7_04_v3	278663	278917	255	278782	146	18.6968	2.28713	17.5434	CSA_5mC_peak_954	PF3D7_0405200	CERLI2	protein CERLI2
Pf3D7_04_v3	282295	283084	790	282783	254	73.9834	4.03398	71.5544	CSA_5mC_peak_955	PF3D7_0405300	LISP2	liver specific protein 2, putative
Pf3D7_04_v3	284815	287409	2595	286372	293	82.7881	3.94774	80.1121	CSA_5mC_peak_956	PF3D7_0405300	LISP2	liver specific protein 2, putative
Pf3D7_04_v3	291885	292282	398	292119	180	28.5949	2.59123	27.2502	CSA_5mC_peak_957	PF3D7_0405400	PRPF8	pre-mRNA-processing-splicing factor 8, putative
Pf3D7_04_v3	292554	292959	406	292776	206	36.119	2.7618	34.6313	CSA_5mC_peak_958	PF3D7_0405400	PRPF8	pre-mRNA-processing-splicing factor 8, putative
Pf3D7_04_v3	293865	294391	527	294157	277	66.5523	3.45901	64.3263	CSA_5mC_peak_959	PF3D7_0405400	PRPF8	pre-mRNA-processing-splicing factor 8, putative
Pf3D7_04_v3	295075	295675	601	295456	188	24.7166	2.34234	23.4453	CSA_5mC_peak_960	PF3D7_0405400	PRPF8	pre-mRNA-processing-splicing factor 8, putative
Pf3D7_04_v3	296771	297406	636	297057	199	34.5081	2.73975	33.0512	CSA_5mC_peak_961	PF3D7_0405400	PRPF8	pre-mRNA-processing-splicing factor 8, putative
Pf3D7_04_v3	297845	298084	240	297949	122	7.76248	1.70187	6.85702	CSA_5mC_peak_962	PF3D7_0405400	PRPF8	pre-mRNA-processing-splicing factor 8, putative
Pf3D7_04_v3	306339	306911	573	306687	186	29.2038	2.57716	27.8476	CSA_5mC_peak_963	PF3D7_0405700		lysine decarboxylase, putative
Pf3D7_04_v3	307952	308195	244	308000	111	4.7916	1.50713	3.97783	CSA_5mC_peak_964	PF3D7_0405700		lysine decarboxylase, putative
Pf3D7_04_v3	308303	308600	298	308504	130	6.47449	1.5824	5.60647	CSA_5mC_peak_965	PF3D7_0405700		lysine decarboxylase, putative
Pf3D7_04_v3	309134	309627	494	309392	216	37.2109	2.73677	35.7017	CSA_5mC_peak_966	PF3D7_0405700		lysine decarboxylase, putative
Pf3D7_04_v3	312409	313107	699	312740	187	25.1833	2.37102	23.9032	CSA_5mC_peak_967	PF3D7_0405700		lysine decarboxylase, putative
Pf3D7_04_v3	317080	318023	944	317557	243	61.4328	3.58308	59.3428	CSA_5mC_peak_968	PF3D7_0405900	ASP	apical sushi protein
Pf3D7_04_v3	323769	324636	868	324440	218	40.9808	2.89117	39.3934	CSA_5mC_peak_969	PF3D7_0406100		V-type proton ATPase subunit B
Pf3D7_04_v3	329748	330160	413	329972	258	76.9706	4.12168	74.4646	CSA_5mC_peak_970	PF3D7_0406200	Pfs16	parasitophorous vacuole membrane protein S16
Pf3D7_04_v3	334061	334407	347	334220	202	44.5713	3.2142	42.9055	CSA_5mC_peak_971	PF3D7_0406400	cGLO2	cytosolic glyoxalase II
Pf3D7_04_v3	335049	336637	1589	336148	257	62.1409	3.46786	60.0314	CSA_5mC_peak_972	PF3D7_0406500		NYN domain-containing protein, putative
Pf3D7_04_v3	336715	337330	616	336924	175	32.1055	2.82303	30.6946	CSA_5mC_peak_973	PF3D7_0406500		NYN domain-containing protein, putative
Pf3D7_04_v3	337556	337938	383	337773	108	6.77762	1.68255	5.9	CSA_5mC_peak_974	PF3D7_0406500		NYN domain-containing protein, putative
Pf3D7_04_v3	338037	338441	405	338233	250	66.2409	3.72364	64.0217	CSA_5mC_peak_975	PF3D7_0406500		NYN domain-containing protein, putative
Pf3D7_04_v3	338661	340526	1866	338936	287	91.893	4.40973	88.9617	CSA_5mC_peak_976	PF3D7_0406500		NYN domain-containing protein, putative
Pf3D7_04_v3	340902	341449	548	341205	278	82.1356	4.09654	79.4774	CSA_5mC_peak_977	PF3D7_0406500		NYN domain-containing protein, putative
Pf3D7_04_v3	342273	342555	283	342453	132	8.77096	1.73393	7.83769	CSA_5mC_peak_978	PF3D7_0406500		NYN domain-containing protein, putative
Pf3D7_04_v3	342915	344047	1133	343873	215	52.9493	3.4956	51.0765	CSA_5mC_peak_979	PF3D7_0406500		NYN domain-containing protein, putative
Pf3D7_04_v3	354208	356329	2122	355689	291	82.4137	3.95474	79.7468	CSA_5mC_peak_980	PF3D7_0406900		conserved Plasmodium protein, unknown function
Pf3D7_04_v3	356537	357599	1063	357289	181	23.3337	2.31577	22.0893	CSA_5mC_peak_981	PF3D7_0406900		conserved Plasmodium protein, unknown function
Pf3D7_04_v3	357869	358663	795	358422	301	87.7645	4.05928	84.9507	CSA_5mC_peak_982	PF3D7_0406900		conserved Plasmodium protein, unknown function
Pf3D7_04_v3	361417	361647	231	361520	120	6.44412	1.61126	5.57688	CSA_5mC_peak_983	PF3D7_0407000		conserved Plasmodium protein, unknown function
Pf3D7_04_v3	362587	362849	263	362735	139	14.1761	2.05106	13.116	CSA_5mC_peak_984	PF3D7_0407100		methyltransferase, putative
Pf3D7_04_v3	366390	366837	448	366568	260	60.0275	3.35077	57.9739	CSA_5mC_peak_985	PF3D7_0407300		transcription factor, putative
Pf3D7_04_v3	367737	368057	321	367886	176	28.1466	2.59888	26.8103	CSA_5mC_peak_986	PF3D7_0407400		conserved Plasmodium protein, unknown function
Pf3D7_04_v3	373412	373665	254	373538	130	11.0683	1.89706	10.0786	CSA_5mC_peak_987	PF3D7_0407600		conserved Plasmodium protein, unknown function
Pf3D7_04_v3	374443	374717	275	374537	125	8.09163	1.7139	7.17634	CSA_5mC_peak_988	PF3D7_0407600		conserved Plasmodium protein, unknown function
Pf3D7_04_v3	375022	375981	960	375254	144	16.4017	2.15962	15.2952	CSA_5mC_peak_989	PF3D7_0407600		conserved Plasmodium protein, unknown function
Pf3D7_04_v3	378784	379547	764	379096	208	27.2424	2.34629	25.9233	CSA_5mC_peak_990	PF3D7_0407700		conserved Plasmodium protein, unknown function
Pf3D7_04_v3	381064	382672	1609	382000	202	31.6711	2.58297	30.2683	CSA_5mC_peak_991	PF3D7_0407700		conserved Plasmodium protein, unknown function
Pf3D7_04_v3	385836	386181	346	385968	114	4.68352	1.48976	3.87395	CSA_5mC_peak_992	PF3D7_0407800	CINCH	protein CINCH
Pf3D7_04_v3	386246	386654	409	386310	122	6.48779	1.60796	5.61939	CSA_5mC_peak_993	PF3D7_0407800	CINCH	protein CINCH
Pf3D7_04_v3	387718	388694	977	388389	203	40.0898	2.97826	38.5213	CSA_5mC_peak_994	PF3D7_0407800	CINCH	protein CINCH
Pf3D7_04_v3	389443	389976	534	389665	215	44.6004	3.08526	42.9338	CSA_5mC_peak_995	PF3D7_0407800	CINCH	protein CINCH
Pf3D7_04_v3	390419	390712	294	390608	135	13.8554	2.05385	12.8038	CSA_5mC_peak_996	PF3D7_0407800	CINCH	protein CINCH
Pf3D7_04_v3	392144	393279	1136	393078	225	41.3238	2.85158	39.7287	CSA_5mC_peak_997	PF3D7_0407900		AAA family ATPase, putative
Pf3D7_04_v3	398437	398933	497	398743	244	50.4137	3.0899	48.6056	CSA_5mC_peak_998	PF3D7_0408100		conserved Plasmodium protein, unknown function
Pf3D7_04_v3	399220	400669	1450	400359	248	47.3698	2.93346	45.6384	CSA_5mC_peak_999	PF3D7_0408100		conserved Plasmodium protein, unknown function
Pf3D7_04_v3	401469	403248	1780	401686	295	82.2763	3.90524	79.6142	CSA_5mC_peak_1000	PF3D7_0408200		conserved Plasmodium protein, unknown function
Pf3D7_04_v3	404292	404535	244	404457	107	7.37947	1.73631	6.48461	CSA_5mC_peak_1001	PF3D7_0408300	ZRANB2	zinc finger Ran-binding domain-containing protein 2, putative
Pf3D7_04_v3	406956	407248	293	407096	129	8.5598	1.73111	7.63228	CSA_5mC_peak_1002	PF3D7_0408400		conserved protein, unknown function
Pf3D7_04_v3	407461	407852	392	407669	210	43.7401	3.09125	42.0933	CSA_5mC_peak_1003	PF3D7_0408400		conserved protein, unknown function
Pf3D7_04_v3	409123	409638	516	409336	223	55.68	3.53778	53.7363	CSA_5mC_peak_1004	PF3D7_0408500	FEN1	flap endonuclease 1
Pf3D7_04_v3	410179	410545	367	410383	189	28.2179	2.50675	26.8802	CSA_5mC_peak_1005	PF3D7_0408500	FEN1	flap endonuclease 1
Pf3D7_04_v3	419621	420075	455	419899	122	11.7834	1.99055	10.7766	CSA_5mC_peak_1006	PF3D7_0408700	PLP1	perforin-like protein 1
Pf3D7_04_v3	420175	420562	388	420379	147	20.5737	2.39513	19.3822	CSA_5mC_peak_1007	PF3D7_0408700	PLP1	perforin-like protein 1
Pf3D7_04_v3	422014	422294	281	422124	141	17.7745	2.26551	16.6401	CSA_5mC_peak_1008	PF3D7_0408800		conserved Plasmodium protein, unknown function
Pf3D7_04_v3	425076	425597	522	425391	170	27.4334	2.60878	26.111	CSA_5mC_peak_1009	PF3D7_0408900	KAE1	tRNA N6-adenosine threonylcarbamoyltransferase
Pf3D7_04_v3	425723	426463	741	425948	188	30.8571	2.6454	29.4695	CSA_5mC_peak_1010	PF3D7_0408900	KAE1	tRNA N6-adenosine threonylcarbamoyltransferase
Pf3D7_04_v3	429480	429885	406	429689	255	60.453	3.41556	58.3882	CSA_5mC_peak_1011	PF3D7_0409000		conserved Plasmodium protein, unknown function
Pf3D7_04_v3	436401	436757	357	436592	199	37.8375	2.90298	36.315	CSA_5mC_peak_1012	PF3D7_0409100	PRPF31	U4/U6 small nuclear ribonucleoprotein PRP31, putative
Pf3D7_04_v3	437253	437829	577	437526	257	60.6306	3.4039	58.5612	CSA_5mC_peak_1013	PF3D7_0409100	PRPF31	U4/U6 small nuclear ribonucleoprotein PRP31, putative
Pf3D7_04_v3	439025	439363	339	439151	139	14.248	2.05561	13.1861	CSA_5mC_peak_1014	PF3D7_0409200	SOF1	protein SOF1, putative
Pf3D7_04_v3	442198	442427	230	442291	125	11.9644	1.9855	10.9541	CSA_5mC_peak_1015	PF3D7_0409300		methyltransferase, putative
Pf3D7_04_v3	443913	444292	380	444088	152	19.4366	2.28964	18.2683	CSA_5mC_peak_1016	PF3D7_0409300		methyltransferase, putative
Pf3D7_04_v3	446685	446960	276	446837	106	4.15151	1.46498	3.3611	CSA_5mC_peak_1017	PF3D7_0409400	DnaJ	chaperone protein DnaJ
Pf3D7_04_v3	447315	447753	439	447531	191	26.294	2.40031	24.993	CSA_5mC_peak_1018	PF3D7_0409400	DnaJ	chaperone protein DnaJ
Pf3D7_04_v3	453249	453824	576	453406	149	10.7843	1.79674	9.80135	CSA_5mC_peak_1019	PF3D7_0409600	RPA1	replication protein A1, large subunit
Pf3D7_04_v3	454629	454999	371	454846	106	5.44505	1.57866	4.60915	CSA_5mC_peak_1020	PF3D7_0409600	RPA1	replication protein A1, large subunit
Pf3D7_04_v3	460045	460424	380	460248	212	38.1652	2.81019	36.6363	CSA_5mC_peak_1021	PF3D7_0409800		zinc finger protein, putative
Pf3D7_04_v3	466255	466728	474	466531	205	47.5269	3.33377	45.791	CSA_5mC_peak_1022	PF3D7_0410000	EVP1	erythrocyte vesicle protein 1
Pf3D7_04_v3	471122	471442	321	471312	151	16.1427	2.10234	15.041	CSA_5mC_peak_1023	PF3D7_0410300	PPM1	protein phosphatase PPM1, putative
Pf3D7_04_v3	471677	472487	811	471929	203	36.4054	2.79915	34.9119	CSA_5mC_peak_1024	PF3D7_0410300	PPM1	protein phosphatase PPM1, putative
Pf3D7_04_v3	474651	474963	313	474837	153	12.9727	1.90857	11.9391	CSA_5mC_peak_1025	PF3D7_0410400	RRP4	exosome complex component RRP4
Pf3D7_04_v3	476055	476493	439	476327	208	35.812	2.73222	34.3306	CSA_5mC_peak_1026	PF3D7_0410500		conserved Plasmodium protein, unknown function
Pf3D7_04_v3	483040	483552	513	483250	203	41.6975	3.05809	40.0951	CSA_5mC_peak_1027	PF3D7_0410700	RbgA	ribosome biogenesis GTPase A, putative
Pf3D7_04_v3	486746	487080	335	486939	167	25.8343	2.54445	24.5421	CSA_5mC_peak_1028	PF3D7_0410800		conserved Plasmodium protein, unknown function
Pf3D7_04_v3	487661	488101	441	487849	160	16.3695	2.06695	15.2636	CSA_5mC_peak_1029	PF3D7_0410800		conserved Plasmodium protein, unknown function
Pf3D7_04_v3	489476	489771	296	489633	171	29.0301	2.68876	27.6772	CSA_5mC_peak_1030	PF3D7_0410800		conserved Plasmodium protein, unknown function
Pf3D7_04_v3	491582	492220	639	491804	178	26.0916	2.47578	24.7943	CSA_5mC_peak_1031	PF3D7_0410900		conserved Plasmodium protein, unknown function
Pf3D7_04_v3	492492	493755	1264	492918	275	74.9016	3.82051	72.4488	CSA_5mC_peak_1032	PF3D7_0410900		conserved Plasmodium protein, unknown function
Pf3D7_04_v3	498385	498661	277	498529	110	8.30613	1.79635	7.38488	CSA_5mC_peak_1033	intergenic
Pf3D7_04_v3	500979	502054	1076	501687	201	29.8161	2.50345	28.4484	CSA_5mC_peak_1034	PF3D7_0411000		conserved Plasmodium protein, unknown function
Pf3D7_04_v3	505710	505984	275	505884	146	19.0039	2.306	17.8448	CSA_5mC_peak_1035	PF3D7_0411200		PP-loop family protein, putative
Pf3D7_04_v3	506215	506542	328	506279	105	4.62045	1.5099	3.81299	CSA_5mC_peak_1036	PF3D7_0411200		PP-loop family protein, putative
Pf3D7_04_v3	506682	507016	335	506859	192	35.8071	2.86319	34.3259	CSA_5mC_peak_1037	PF3D7_0411200		PP-loop family protein, putative
Pf3D7_04_v3	509289	509580	292	509444	127	11.7321	1.95801	10.7278	CSA_5mC_peak_1038	PF3D7_0411200		PP-loop family protein, putative
Pf3D7_04_v3	511096	511902	807	511737	158	18.1651	2.1781	17.0228	CSA_5mC_peak_1039	PF3D7_0411300		conserved Plasmodium protein, unknown function
Pf3D7_04_v3	515124	515463	340	515302	172	22.3992	2.32299	21.1725	CSA_5mC_peak_1040	PF3D7_0411400		DEAD box ATP-dependent RNA helicase, putative
Pf3D7_04_v3	518038	518268	231	518182	134	12.0731	1.94333	11.0604	CSA_5mC_peak_1041	intergenic
Pf3D7_04_v3	518674	518954	281	518813	137	12.3578	1.94634	11.3396	CSA_5mC_peak_1042	PF3D7_0411700		conserved Plasmodium protein, unknown function
Pf3D7_04_v3	520551	520957	407	520700	156	17.047	2.12635	15.9273	CSA_5mC_peak_1043	PF3D7_0411800		conserved Plasmodium protein, unknown function
Pf3D7_04_v3	522909	523350	442	523146	204	35.6551	2.75547	34.1764	CSA_5mC_peak_1044	PF3D7_0411800		conserved Plasmodium protein, unknown function
Pf3D7_04_v3	524865	525287	423	525073	191	30.7507	2.61733	29.3652	CSA_5mC_peak_1045	PF3D7_0411800		conserved Plasmodium protein, unknown function
Pf3D7_04_v3	528491	528752	262	528634	131	12.1263	1.96273	11.1111	CSA_5mC_peak_1046	PF3D7_0411900		DNA polymerase alpha catalytic subunit A
Pf3D7_04_v3	532956	533429	474	533230	186	27.2468	2.47915	25.9274	CSA_5mC_peak_1047	PF3D7_0411900		DNA polymerase alpha catalytic subunit A
Pf3D7_04_v3	533589	533818	230	533742	122	8.63766	1.76532	7.70761	CSA_5mC_peak_1048	PF3D7_0411900		DNA polymerase alpha catalytic subunit A
Pf3D7_04_v3	538474	539172	699	538947	198	37.4426	2.89222	35.9285	CSA_5mC_peak_1049	PF3D7_0412000		LITAF-like zinc finger protein, putative
Pf3D7_04_v3	547283	550758	3476	547854	312	103.437	4.56853	100.163	CSA_5mC_peak_1050	PF3D7_0412400	VAR	erythrocyte membrane protein 1, PfEMP1
Pf3D7_04_v3	551017	552675	1659	551950	228	53.7074	3.38659	51.8155	CSA_5mC_peak_1051	PF3D7_0412400	VAR	erythrocyte membrane protein 1, PfEMP1
Pf3D7_04_v3	552882	553818	937	553569	191	35.4304	2.85286	33.9559	CSA_5mC_peak_1052	PF3D7_0412400	VAR	erythrocyte membrane protein 1, PfEMP1
Pf3D7_04_v3	561270	561746	477	561476	241	57.2194	3.41315	55.2371	CSA_5mC_peak_1053	PF3D7_0412700	VAR	erythrocyte membrane protein 1, PfEMP1
Pf3D7_04_v3	563043	566328	3286	564079	249	70.0233	3.91162	67.7036	CSA_5mC_peak_1054	PF3D7_0412700	VAR	erythrocyte membrane protein 1, PfEMP1
Pf3D7_04_v3	566465	569337	2873	567496	218	40.3576	2.86295	38.7833	CSA_5mC_peak_1055	PF3D7_0412700	VAR	erythrocyte membrane protein 1, PfEMP1
Pf3D7_04_v3	582584	582963	380	582820	164	27.6041	2.67025	26.278	CSA_5mC_peak_1056	PF3D7_0412900	VAR	erythrocyte membrane protein 1, PfEMP1
Pf3D7_04_v3	583589	584048	460	583731	153	22.9641	2.49223	21.7262	CSA_5mC_peak_1057	PF3D7_0412900	VAR	erythrocyte membrane protein 1, PfEMP1
Pf3D7_04_v3	584257	584635	379	584416	157	23.6389	2.49948	22.3886	CSA_5mC_peak_1058	PF3D7_0412900	VAR	erythrocyte membrane protein 1, PfEMP1
Pf3D7_04_v3	597721	598140	420	597990	150	21.7561	2.44368	20.5415	CSA_5mC_peak_1059	PF3D7_0413100	VAR	erythrocyte membrane protein 1, PfEMP1
Pf3D7_04_v3	598585	599776	1192	599201	208	49.1321	3.38232	47.3565	CSA_5mC_peak_1060	PF3D7_0413100	VAR	erythrocyte membrane protein 1, PfEMP1
Pf3D7_04_v3	603811	604054	244	603863	111	3.70512	1.41253	2.93255	CSA_5mC_peak_1061	PF3D7_0413200	RIF	rifin
Pf3D7_04_v3	609693	610066	374	609886	165	18.7213	2.16866	17.5674	CSA_5mC_peak_1062	PF3D7_0413300	RIF	rifin
Pf3D7_04_v3	611454	611702	249	611573	146	11.8129	1.87043	10.8051	CSA_5mC_peak_1063	intergenic
Pf3D7_04_v3	611974	614174	2201	612167	185	31.3094	2.6923	29.9137	CSA_5mC_peak_1064	intergenic
Pf3D7_04_v3	615581	615874	294	615730	166	19.469	2.2033	18.2998	CSA_5mC_peak_1065	PF3D7_0413500	PGM2	phosphoglucomutase-2
Pf3D7_04_v3	620123	620890	768	620598	231	48.4931	3.11839	46.7338	CSA_5mC_peak_1066	PF3D7_0413700		lysine decarboxylase-like protein, putative
Pf3D7_04_v3	623675	624097	423	623862	168	17.2891	2.07648	16.1644	CSA_5mC_peak_1067	PF3D7_0413900	USP13	ubiquitin carboxyl-terminal hydrolase 13, putative
Pf3D7_04_v3	625149	625852	704	625446	223	44.6156	3.01425	42.9489	CSA_5mC_peak_1068	PF3D7_0413900	USP13	ubiquitin carboxyl-terminal hydrolase 13, putative
Pf3D7_04_v3	632409	632813	405	632601	156	14.3391	1.97303	13.276	CSA_5mC_peak_1069	PF3D7_0414000	SMC3	structural maintenance of chromosomes protein 3
Pf3D7_04_v3	636945	637228	284	637096	176	18.7047	2.11025	17.551	CSA_5mC_peak_1070	PF3D7_0414100		conserved Plasmodium membrane protein, unknown function
Pf3D7_04_v3	652920	653513	594	653353	192	30.9308	2.61878	29.5422	CSA_5mC_peak_1071	PF3D7_0414400		conserved Plasmodium protein, unknown function
Pf3D7_04_v3	658803	659042	240	658977	97	4.77385	1.55031	3.9607	CSA_5mC_peak_1072	PF3D7_0414600	APH	acylated pleckstrin-homology domain-containing protein, putative
Pf3D7_04_v3	660941	661203	263	661083	112	4.75563	1.50127	3.94312	CSA_5mC_peak_1073	PF3D7_0414700		GTP-binding protein, putative
Pf3D7_04_v3	671051	671303	253	671135	105	4.62045	1.5099	3.81299	CSA_5mC_peak_1074	PF3D7_0415100		conserved protein, unknown function
Pf3D7_04_v3	672000	672259	260	672108	132	10.5576	1.85331	9.58074	CSA_5mC_peak_1075	PF3D7_0415100		conserved protein, unknown function
Pf3D7_04_v3	673078	673622	545	673429	308	92.1078	4.15337	89.1693	CSA_5mC_peak_1076	PF3D7_0415200		conserved Plasmodium protein, unknown function
Pf3D7_04_v3	675960	676278	319	676031	108	4.3692	1.479	3.57071	CSA_5mC_peak_1077	PF3D7_0415200		conserved Plasmodium protein, unknown function
Pf3D7_04_v3	676645	677630	986	676776	181	31.184	2.71908	29.7902	CSA_5mC_peak_1078	PF3D7_0415200		conserved Plasmodium protein, unknown function
Pf3D7_04_v3	678665	679692	1028	679055	245	65.0372	3.72675	62.8503	CSA_5mC_peak_1079	PF3D7_0415200		conserved Plasmodium protein, unknown function
Pf3D7_04_v3	681994	682362	369	682197	221	49.1858	3.24483	47.4083	CSA_5mC_peak_1080	PF3D7_0415300	CRK3	cdc2-related protein kinase 3
Pf3D7_04_v3	684965	686045	1081	685523	290	71.8144	3.54503	69.4449	CSA_5mC_peak_1081	PF3D7_0415300	CRK3	cdc2-related protein kinase 3
Pf3D7_04_v3	686442	686980	539	686840	114	4.84724	1.50338	4.03165	CSA_5mC_peak_1082	PF3D7_0415400		coatomer subunit zeta, putative
Pf3D7_04_v3	690038	690381	344	690144	129	13.6863	2.07953	12.637	CSA_5mC_peak_1083	PF3D7_0415600	GAK	GTP:AMP phosphotransferase
Pf3D7_04_v3	692787	693051	265	692888	140	17.9166	2.28185	16.7789	CSA_5mC_peak_1084	intergenic
Pf3D7_04_v3	697941	698453	513	698241	163	18.7925	2.18386	17.6373	CSA_5mC_peak_1085	PF3D7_0415900		60S ribosomal protein L15, putative
Pf3D7_04_v3	703573	704086	514	703859	262	65.6899	3.5686	63.4852	CSA_5mC_peak_1086	PF3D7_0416000		RNA-binding protein, putative
Pf3D7_04_v3	706604	706933	330	706787	185	25.2753	2.3879	23.9936	CSA_5mC_peak_1087	PF3D7_0416100	GATA	glutamyl-tRNA(Gln) amidotransferase subunit A
Pf3D7_04_v3	707573	707964	392	707724	153	13.5726	1.94311	12.5256	CSA_5mC_peak_1088	PF3D7_0416100	GATA	glutamyl-tRNA(Gln) amidotransferase subunit A
Pf3D7_04_v3	709246	710137	892	709739	267	65.3252	3.50352	63.131	CSA_5mC_peak_1089	PF3D7_0416100	GATA	glutamyl-tRNA(Gln) amidotransferase subunit A
Pf3D7_04_v3	711879	712887	1009	712560	281	83.132	4.10269	80.4462	CSA_5mC_peak_1090	PF3D7_0416300	MCM9	DNA helicase MCM9, putative
Pf3D7_04_v3	713065	713823	759	713487	179	28.4191	2.58977	27.078	CSA_5mC_peak_1091	PF3D7_0416300	MCM9	DNA helicase MCM9, putative
Pf3D7_04_v3	713868	714230	363	714082	139	12.964	1.97455	11.9311	CSA_5mC_peak_1092	PF3D7_0416300	MCM9	DNA helicase MCM9, putative
Pf3D7_04_v3	714372	714663	292	714464	128	13.7109	2.08765	12.6606	CSA_5mC_peak_1093	PF3D7_0416300	MCM9	DNA helicase MCM9, putative
Pf3D7_04_v3	718915	721393	2479	719887	285	82.5659	4.03006	79.896	CSA_5mC_peak_1094	PF3D7_0416400	HAT1	histone acetyltransferase, putative
Pf3D7_04_v3	721699	722012	314	721836	141	13.2681	1.9832	12.228	CSA_5mC_peak_1095	PF3D7_0416400	HAT1	histone acetyltransferase, putative
Pf3D7_04_v3	723617	724063	447	723874	187	26.949	2.45769	25.6356	CSA_5mC_peak_1096	PF3D7_0416500	MAF1	repressor of RNA polymerase III transcription MAF1
Pf3D7_04_v3	726329	726634	306	726492	174	22.4886	2.31516	21.2602	CSA_5mC_peak_1097	PF3D7_0416600	PHBL	prohibitin-like protein PHBL, putative
Pf3D7_04_v3	733055	733417	363	733230	193	27.5231	2.4467	26.1991	CSA_5mC_peak_1098	PF3D7_0416900		conserved Plasmodium protein, unknown function
Pf3D7_04_v3	734622	735241	620	735042	163	19.3861	2.21637	18.2192	CSA_5mC_peak_1099	PF3D7_0416900		conserved Plasmodium protein, unknown function
Pf3D7_04_v3	735819	736398	580	735986	136	12.5109	1.96132	11.4875	CSA_5mC_peak_1100	PF3D7_0416900		conserved Plasmodium protein, unknown function
Pf3D7_04_v3	736562	737170	609	737015	173	28.3703	2.63533	27.0301	CSA_5mC_peak_1101	PF3D7_0416900		conserved Plasmodium protein, unknown function
Pf3D7_04_v3	739248	739643	396	739456	213	36.9571	2.74737	35.4527	CSA_5mC_peak_1102	PF3D7_0416900		conserved Plasmodium protein, unknown function
Pf3D7_04_v3	739956	740191	236	740055	129	13.2298	2.04854	12.1918	CSA_5mC_peak_1103	PF3D7_0416900		conserved Plasmodium protein, unknown function
Pf3D7_04_v3	744868	745122	255	745025	148	8.66888	1.67271	7.73807	CSA_5mC_peak_1104	PF3D7_0417100	PUF2	mRNA-binding protein PUF2
Pf3D7_04_v3	749089	749432	344	749302	158	14.5989	1.97835	13.5298	CSA_5mC_peak_1105	PF3D7_0417200	DHFR-TS	bifunctional dihydrofolate reductase-thymidylate synthase
Pf3D7_04_v3	751560	752050	491	751850	170	19.7458	2.19533	18.5715	CSA_5mC_peak_1106	PF3D7_0417300		LETM1-like protein, putative
Pf3D7_04_v3	752822	753465	644	753105	181	32.8669	2.8087	31.4418	CSA_5mC_peak_1107	PF3D7_0417300		LETM1-like protein, putative
Pf3D7_04_v3	757281	757583	303	757435	165	18.0255	2.13114	16.8856	CSA_5mC_peak_1108	PF3D7_0417400		conserved Plasmodium protein, unknown function
Pf3D7_04_v3	757801	758209	409	758018	203	32.0922	2.5957	30.682	CSA_5mC_peak_1109	PF3D7_0417400		conserved Plasmodium protein, unknown function
Pf3D7_04_v3	763585	763906	322	763754	177	28.2802	2.59808	26.9416	CSA_5mC_peak_1110	PF3D7_0417400		conserved Plasmodium protein, unknown function
Pf3D7_04_v3	764786	765331	546	765043	338	119.884	4.89226	116.016	CSA_5mC_peak_1111	PF3D7_0417400		conserved Plasmodium protein, unknown function
Pf3D7_04_v3	765593	766226	634	765866	277	66.2061	3.44534	63.9874	CSA_5mC_peak_1112	PF3D7_0417400		conserved Plasmodium protein, unknown function
Pf3D7_04_v3	769379	770030	652	769545	233	42.6935	2.85064	41.0696	CSA_5mC_peak_1113	PF3D7_0417400		conserved Plasmodium protein, unknown function
Pf3D7_04_v3	771467	771882	416	771687	187	26.949	2.45769	25.6356	CSA_5mC_peak_1114	PF3D7_0417400		conserved Plasmodium protein, unknown function
Pf3D7_04_v3	772013	772266	254	772153	127	6.40609	1.58634	5.53985	CSA_5mC_peak_1115	PF3D7_0417400		conserved Plasmodium protein, unknown function
Pf3D7_04_v3	772868	773160	293	772968	154	16.378	2.09926	15.2721	CSA_5mC_peak_1116	PF3D7_0417400		conserved Plasmodium protein, unknown function
Pf3D7_04_v3	774725	775158	434	774992	183	26.2637	2.45018	24.9633	CSA_5mC_peak_1117	PF3D7_0417400		conserved Plasmodium protein, unknown function
Pf3D7_04_v3	775678	776636	959	775931	268	71.7836	3.76515	69.4156	CSA_5mC_peak_1118	PF3D7_0417400		conserved Plasmodium protein, unknown function
Pf3D7_04_v3	780276	781392	1117	781150	239	66.7619	3.884	64.5292	CSA_5mC_peak_1119	PF3D7_0417600		conserved Plasmodium protein, unknown function
Pf3D7_04_v3	781440	782075	636	781689	245	54.9832	3.27579	53.0574	CSA_5mC_peak_1120	PF3D7_0417600		conserved Plasmodium protein, unknown function
Pf3D7_04_v3	782339	782674	336	782527	142	11.2386	1.85249	10.2444	CSA_5mC_peak_1121	PF3D7_0417600		conserved Plasmodium protein, unknown function
Pf3D7_04_v3	786995	787392	398	787192	143	19.0376	2.3304	17.8771	CSA_5mC_peak_1122	PF3D7_0417800	CRK1	cdc2-related protein kinase 1
Pf3D7_04_v3	788152	788379	228	788261	140	10.428	1.81019	9.45344	CSA_5mC_peak_1123	PF3D7_0417800	CRK1	cdc2-related protein kinase 1
Pf3D7_04_v3	788453	789229	777	788903	308	105.26	4.70268	101.925	CSA_5mC_peak_1124	PF3D7_0417800	CRK1	cdc2-related protein kinase 1
Pf3D7_04_v3	790812	791761	950	791016	217	52.4836	3.44865	50.6227	CSA_5mC_peak_1125	PF3D7_0417900		conserved Plasmodium protein, unknown function
Pf3D7_04_v3	792101	792821	721	792391	291	68.5305	3.41194	66.2518	CSA_5mC_peak_1126	PF3D7_0417900		conserved Plasmodium protein, unknown function
Pf3D7_04_v3	793875	794170	296	793993	155	21.4837	2.3886	20.2745	CSA_5mC_peak_1127	PF3D7_0418000		conserved Plasmodium protein, unknown function
Pf3D7_04_v3	794278	794785	508	794621	151	16.85	2.14379	15.7341	CSA_5mC_peak_1128	PF3D7_0418000		conserved Plasmodium protein, unknown function
Pf3D7_04_v3	795504	795743	240	795675	134	10.3683	1.83179	9.39518	CSA_5mC_peak_1129	PF3D7_0418000		conserved Plasmodium protein, unknown function
Pf3D7_04_v3	799934	800164	231	800096	130	6.10579	1.55612	5.24871	CSA_5mC_peak_1130	PF3D7_0418000		conserved Plasmodium protein, unknown function
Pf3D7_04_v3	801897	802577	681	802205	252	66.3527	3.7057	64.1312	CSA_5mC_peak_1131	PF3D7_0418000		conserved Plasmodium protein, unknown function
Pf3D7_04_v3	803203	803458	256	803306	133	11.1826	1.88992	10.19	CSA_5mC_peak_1132	PF3D7_0418000		conserved Plasmodium protein, unknown function
Pf3D7_04_v3	803638	803946	309	803816	165	22.9599	2.40003	21.7227	CSA_5mC_peak_1133	PF3D7_0418000		conserved Plasmodium protein, unknown function
Pf3D7_04_v3	804228	804650	423	804395	173	25.4008	2.4752	24.117	CSA_5mC_peak_1134	PF3D7_0418000		conserved Plasmodium protein, unknown function
Pf3D7_04_v3	808394	809407	1014	808867	201	35.7517	2.78389	34.2714	CSA_5mC_peak_1135	PF3D7_0418000		conserved Plasmodium protein, unknown function
Pf3D7_04_v3	811245	811478	234	811438	94	4.19503	1.50494	3.40314	CSA_5mC_peak_1136	PF3D7_0418100	SOC1	protein SOC1, putative
Pf3D7_04_v3	812418	812917	500	812776	128	7.22044	1.6414	6.33032	CSA_5mC_peak_1137	PF3D7_0418100	SOC1	protein SOC1, putative
Pf3D7_04_v3	813094	813849	756	813535	201	41.3351	3.0594	39.7399	CSA_5mC_peak_1138	PF3D7_0418100	SOC1	protein SOC1, putative
Pf3D7_04_v3	817349	817747	399	817620	169	19.3508	2.18007	18.1847	CSA_5mC_peak_1139	PF3D7_0418200	EIF3M	eukaryotic translation initiation factor 3 subunit M, putative
Pf3D7_04_v3	819443	819835	393	819640	123	7.54908	1.68253	6.64912	CSA_5mC_peak_1140	PF3D7_0418300		conserved Plasmodium protein, unknown function
Pf3D7_04_v3	820339	822184	1846	821759	298	74.6962	3.58149	72.2485	CSA_5mC_peak_1141	PF3D7_0418300		conserved Plasmodium protein, unknown function
Pf3D7_04_v3	834899	835408	510	835175	179	23.7052	2.34668	22.4538	CSA_5mC_peak_1142	PF3D7_0418600		regulator of chromosome condensation, putative
Pf3D7_04_v3	836724	836966	243	836848	109	5.26826	1.55351	4.4382	CSA_5mC_peak_1143	PF3D7_0418600		regulator of chromosome condensation, putative
Pf3D7_04_v3	837039	838017	979	837285	230	47.3303	3.07547	45.5996	CSA_5mC_peak_1144	PF3D7_0418600		regulator of chromosome condensation, putative
Pf3D7_04_v3	839229	840040	812	839788	283	88.4505	4.3107	85.6186	CSA_5mC_peak_1145	PF3D7_0418600		regulator of chromosome condensation, putative
Pf3D7_04_v3	841437	842379	943	841662	284	82.9818	4.05964	80.2986	CSA_5mC_peak_1146	PF3D7_0418700		RNA-binding protein NOB1, putative
Pf3D7_04_v3	847511	847782	272	847650	129	11.9153	1.95946	10.9055	CSA_5mC_peak_1147	PF3D7_0418900		conserved protein, unknown function
Pf3D7_04_v3	849772	850021	250	849885	138	14.7768	2.09512	13.704	CSA_5mC_peak_1148	PF3D7_0419000		conserved Plasmodium protein, unknown function
Pf3D7_04_v3	854766	855237	472	854961	185	36.678	2.97533	35.1792	CSA_5mC_peak_1149	PF3D7_0419300		conserved Plasmodium protein, unknown function
Pf3D7_04_v3	855363	855653	291	855490	110	8.2731	1.79373	7.3533	CSA_5mC_peak_1150	PF3D7_0419300		conserved Plasmodium protein, unknown function
Pf3D7_04_v3	856408	856888	481	856589	188	23.8907	2.30244	22.6353	CSA_5mC_peak_1151	PF3D7_0419300		conserved Plasmodium protein, unknown function
Pf3D7_04_v3	858992	859393	402	859223	201	30.7665	2.54759	29.3807	CSA_5mC_peak_1152	PF3D7_0419400		conserved Plasmodium protein, unknown function
Pf3D7_04_v3	865069	865533	465	865306	235	59.8255	3.59868	57.7769	CSA_5mC_peak_1153	PF3D7_0419400		conserved Plasmodium protein, unknown function
Pf3D7_04_v3	871349	872026	678	871668	293	74.2932	3.61234	71.8559	CSA_5mC_peak_1154	PF3D7_0419600	RANBP1	ran-specific GTPase-activating protein 1, putative
Pf3D7_04_v3	875163	875580	418	875369	246	57.681	3.38359	55.6871	CSA_5mC_peak_1155	PF3D7_0419700	Pf34	apical merozoite protein
Pf3D7_04_v3	876651	876899	249	876788	161	18.4674	2.17749	17.3189	CSA_5mC_peak_1156	PF3D7_0419900		phosphatidylinositol 4-kinase, putative
Pf3D7_04_v3	879886	880132	247	879981	121	6.87023	1.63984	5.99008	CSA_5mC_peak_1157	PF3D7_0419900		phosphatidylinositol 4-kinase, putative
Pf3D7_04_v3	881487	882135	649	881656	229	48.3194	3.12854	46.5644	CSA_5mC_peak_1158	PF3D7_0419900		phosphatidylinositol 4-kinase, putative
Pf3D7_04_v3	884302	884942	641	884735	205	30.5879	2.51331	29.2057	CSA_5mC_peak_1159	PF3D7_0419900		phosphatidylinositol 4-kinase, putative
Pf3D7_04_v3	885520	886007	488	885693	238	44.4378	2.88697	42.7749	CSA_5mC_peak_1160	PF3D7_0419900		phosphatidylinositol 4-kinase, putative
Pf3D7_04_v3	887524	888446	923	888046	311	92.7444	4.14421	89.7867	CSA_5mC_peak_1161	PF3D7_0419900		phosphatidylinositol 4-kinase, putative
Pf3D7_04_v3	889318	890016	699	889838	180	27.8338	2.55164	26.5036	CSA_5mC_peak_1162	PF3D7_0419900		phosphatidylinositol 4-kinase, putative
Pf3D7_04_v3	891801	892857	1057	892017	276	72.1726	3.69574	69.7936	CSA_5mC_peak_1163	PF3D7_0419900		phosphatidylinositol 4-kinase, putative
Pf3D7_04_v3	894764	895309	546	895107	132	9.08031	1.75472	8.13918	CSA_5mC_peak_1164	PF3D7_0420000		zinc finger protein, putative
Pf3D7_04_v3	895375	896414	1040	896080	230	38.0653	2.6773	36.5384	CSA_5mC_peak_1165	PF3D7_0420000		zinc finger protein, putative
Pf3D7_04_v3	896717	898073	1357	897211	336	115.41	4.73807	111.692	CSA_5mC_peak_1166	PF3D7_0420000		zinc finger protein, putative
Pf3D7_04_v3	898599	899131	533	898809	241	49.571	3.07921	47.7845	CSA_5mC_peak_1167	PF3D7_0420000		zinc finger protein, putative
Pf3D7_04_v3	900227	900541	315	900379	191	30.9468	2.62703	29.558	CSA_5mC_peak_1168	PF3D7_0420000		zinc finger protein, putative
Pf3D7_04_v3	901981	902213	233	902080	140	7.87858	1.64755	6.96948	CSA_5mC_peak_1169	PF3D7_0420000		zinc finger protein, putative
Pf3D7_04_v3	902631	903309	679	902972	305	96.0567	4.35097	93.0024	CSA_5mC_peak_1170	PF3D7_0420000		zinc finger protein, putative
Pf3D7_04_v3	903358	904012	655	903786	260	52.545	3.04971	50.6832	CSA_5mC_peak_1171	PF3D7_0420000		zinc finger protein, putative
Pf3D7_04_v3	908066	908871	806	908649	229	43.1585	2.90072	41.5243	CSA_5mC_peak_1172	PF3D7_0420100	RIO2	serine/threonine protein kinase RIO2
Pf3D7_04_v3	910938	911253	316	911103	149	13.5363	1.95964	12.4916	CSA_5mC_peak_1173	PF3D7_0420200	ACPS	holo-[acyl-carrier-protein] synthase, putative
Pf3D7_04_v3	912986	913224	239	913099	131	14.7194	2.1362	13.6483	CSA_5mC_peak_1174	intergenic
Pf3D7_04_v3	915657	916009	353	915811	201	44.3385	3.21297	42.6784	CSA_5mC_peak_1175	PF3D7_0420300	ApiAP2	AP2 domain transcription factor, putative
Pf3D7_04_v3	918958	919262	305	919097	177	20.3257	2.18706	19.1395	CSA_5mC_peak_1176	PF3D7_0420300	ApiAP2	AP2 domain transcription factor, putative
Pf3D7_04_v3	919789	920620	832	920305	272	64.248	3.41294	62.0825	CSA_5mC_peak_1177	PF3D7_0420300	ApiAP2	AP2 domain transcription factor, putative
Pf3D7_04_v3	921335	921650	316	921511	179	24.5835	2.3914	23.3152	CSA_5mC_peak_1178	PF3D7_0420300	ApiAP2	AP2 domain transcription factor, putative
Pf3D7_04_v3	921768	922119	352	921933	151	14.9443	2.03231	13.8682	CSA_5mC_peak_1179	PF3D7_0420300	ApiAP2	AP2 domain transcription factor, putative
Pf3D7_04_v3	922866	923141	276	923041	130	7.26154	1.63771	6.37034	CSA_5mC_peak_1180	PF3D7_0420300	ApiAP2	AP2 domain transcription factor, putative
Pf3D7_04_v3	923310	927029	3720	926825	216	42.9207	2.99719	41.2918	CSA_5mC_peak_1181	PF3D7_0420300	ApiAP2	AP2 domain transcription factor, putative
Pf3D7_04_v3	927720	928152	433	927935	140	11.7808	1.89523	10.7746	CSA_5mC_peak_1182	PF3D7_0420300	ApiAP2	AP2 domain transcription factor, putative
Pf3D7_04_v3	929399	929727	329	929558	197	31.549	2.61229	30.1488	CSA_5mC_peak_1183	PF3D7_0420400	RRF2	ribosome-recycling factor
Pf3D7_04_v3	932405	933043	639	932832	202	30.2235	2.51584	28.8483	CSA_5mC_peak_1184	PF3D7_0420600		conserved Plasmodium protein, unknown function
Pf3D7_04_v3	935277	935588	312	935421	144	13.4812	1.98093	12.437	CSA_5mC_peak_1185	PF3D7_0420700	VAR	erythrocyte membrane protein 1, PfEMP1
Pf3D7_04_v3	936401	937844	1444	937406	206	30.9134	2.52172	29.525	CSA_5mC_peak_1186	PF3D7_0420700	VAR	erythrocyte membrane protein 1, PfEMP1
Pf3D7_04_v3	938150	939094	945	938302	162	19.6435	2.23658	18.4712	CSA_5mC_peak_1187	PF3D7_0420700	VAR	erythrocyte membrane protein 1, PfEMP1
Pf3D7_04_v3	950740	951027	288	950928	150	21.7561	2.44368	20.5415	CSA_5mC_peak_1188	PF3D7_0420900	VAR	erythrocyte membrane protein 1, PfEMP1
Pf3D7_04_v3	962664	964587	1924	963262	257	40.9725	2.62825	39.3851	CSA_5mC_peak_1189	PF3D7_0421100	VAR	erythrocyte membrane protein 1, PfEMP1
Pf3D7_04_v3	964904	965748	845	965598	177	10.285	1.6813	9.31392	CSA_5mC_peak_1190	PF3D7_0421100	VAR	erythrocyte membrane protein 1, PfEMP1
Pf3D7_04_v3	967409	967859	451	967620	292	44.3222	2.56474	42.6628	CSA_5mC_peak_1191	PF3D7_0421200	RIF	rifin
Pf3D7_04_v3	968653	969220	568	968890	367	74.5965	3.08893	72.1521	CSA_5mC_peak_1192	PF3D7_0421300	VAR	erythrocyte membrane protein 1, PfEMP1
Pf3D7_04_v3	970325	973249	2925	970695	294	49.2269	2.71515	47.4485	CSA_5mC_peak_1193	PF3D7_0421300	VAR	erythrocyte membrane protein 1, PfEMP1
Pf3D7_04_v3	973520	973853	334	973673	159	11.0958	1.7788	10.1057	CSA_5mC_peak_1194	PF3D7_0421300	VAR	erythrocyte membrane protein 1, PfEMP1
Pf3D7_04_v3	973912	975690	1779	974370	199	25.1699	2.3018	23.8902	CSA_5mC_peak_1195	PF3D7_0421300	VAR	erythrocyte membrane protein 1, PfEMP1
Pf3D7_04_v3	976067	976659	593	976433	193	29.8988	2.56113	28.5293	CSA_5mC_peak_1196	PF3D7_0421300	VAR	erythrocyte membrane protein 1, PfEMP1
Pf3D7_04_v3	982174	982677	504	982416	158	16.0561	2.05976	14.9567	CSA_5mC_peak_1197	intergenic
Pf3D7_04_v3	991683	992081	399	991898	190	31.6525	2.66982	30.2501	CSA_5mC_peak_1198	PF3D7_0421700		conserved Plasmodium protein, unknown function
Pf3D7_04_v3	993963	994208	246	994115	151	12.1205	1.8676	11.1053	CSA_5mC_peak_1199	PF3D7_0421700		conserved Plasmodium protein, unknown function
Pf3D7_04_v3	996059	996296	238	996187	130	13.0082	2.02751	11.9734	CSA_5mC_peak_1200	PF3D7_0421800		conserved Plasmodium protein, unknown function
Pf3D7_04_v3	1001669	1001994	326	1001784	117	6.18769	1.60161	5.32839	CSA_5mC_peak_1201	PF3D7_0422100		transmembrane emp24 domain-containing protein, putative
Pf3D7_04_v3	1006481	1006760	280	1006594	164	16.0046	2.02733	14.9065	CSA_5mC_peak_1202	PF3D7_0422200		erythrocyte membrane-associated antigen
Pf3D7_04_v3	1006862	1007440	579	1007230	186	26.314	2.43288	25.0123	CSA_5mC_peak_1203	PF3D7_0422200		erythrocyte membrane-associated antigen
Pf3D7_04_v3	1014308	1014979	672	1014781	199	40.2212	3.02255	38.6503	CSA_5mC_peak_1204	PF3D7_0422200		erythrocyte membrane-associated antigen
Pf3D7_04_v3	1015049	1015632	584	1015420	262	75.7504	4.01234	73.2763	CSA_5mC_peak_1205	PF3D7_0422200		erythrocyte membrane-associated antigen
Pf3D7_04_v3	1016076	1016393	318	1016200	183	30.8174	2.68316	29.431	CSA_5mC_peak_1206	PF3D7_0422200		erythrocyte membrane-associated antigen
Pf3D7_04_v3	1016887	1017340	454	1017127	212	37.0549	2.7593	35.5486	CSA_5mC_peak_1207	PF3D7_0422200		erythrocyte membrane-associated antigen
Pf3D7_04_v3	1023065	1023444	380	1023241	179	31.5523	2.75608	30.152	CSA_5mC_peak_1208	PF3D7_0422300		alpha tubulin 2
Pf3D7_04_v3	1023895	1024276	382	1024053	203	40.5845	3.00272	39.0058	CSA_5mC_peak_1209	PF3D7_0422300		alpha tubulin 2
Pf3D7_04_v3	1027114	1027346	233	1027224	132	11.4654	1.91355	10.467	CSA_5mC_peak_1210	PF3D7_0422400	RPS19	40S ribosomal protein S19
Pf3D7_04_v3	1029365	1031460	2096	1030701	261	72.4401	3.87461	70.0528	CSA_5mC_peak_1211	PF3D7_0422500	BRR2	pre-mRNA-splicing helicase BRR2, putative
Pf3D7_04_v3	1031733	1032581	849	1032140	198	37.0599	2.87318	35.5535	CSA_5mC_peak_1212	PF3D7_0422500	BRR2	pre-mRNA-splicing helicase BRR2, putative
Pf3D7_04_v3	1035089	1035336	248	1035182	134	9.72888	1.78976	8.77112	CSA_5mC_peak_1213	PF3D7_0422500	BRR2	pre-mRNA-splicing helicase BRR2, putative
Pf3D7_04_v3	1040558	1040938	381	1040783	134	15.455	2.16484	14.3675	CSA_5mC_peak_1214	PF3D7_0422700	EIF4A3	eukaryotic initiation factor 4A-III, putative
Pf3D7_04_v3	1041191	1041599	409	1041456	177	28.0715	2.58701	26.7364	CSA_5mC_peak_1215	PF3D7_0422700	EIF4A3	eukaryotic initiation factor 4A-III, putative
Pf3D7_04_v3	1047705	1048175	471	1047853	183	25.3718	2.4054	24.0883	CSA_5mC_peak_1216	PF3D7_0423000		conserved Plasmodium protein, unknown function
Pf3D7_04_v3	1051583	1052373	791	1051898	268	81.7401	4.20891	79.0917	CSA_5mC_peak_1217	PF3D7_0423300		conserved Plasmodium protein, unknown function
Pf3D7_04_v3	1055749	1056253	505	1055934	169	21.329	2.28502	20.1232	CSA_5mC_peak_1218	PF3D7_0423400	AARP	apical asparagine-rich protein AARP
Pf3D7_04_v3	1061646	1062928	1283	1061871	236	59.095	3.55279	57.0662	CSA_5mC_peak_1219	PF3D7_0423600		conserved Plasmodium protein, unknown function
Pf3D7_04_v3	1063349	1063672	324	1063527	124	7.35106	1.66453	6.45686	CSA_5mC_peak_1220	PF3D7_0423600		conserved Plasmodium protein, unknown function
Pf3D7_04_v3	1064448	1064697	250	1064572	103	6.52584	1.68307	5.65571	CSA_5mC_peak_1221	PF3D7_0423600		conserved Plasmodium protein, unknown function
Pf3D7_04_v3	1066022	1066549	528	1066147	160	18.8657	2.2055	17.7091	CSA_5mC_peak_1222	PF3D7_0423600		conserved Plasmodium protein, unknown function
Pf3D7_04_v3	1076419	1076765	347	1076604	142	14.2204	2.03694	13.159	CSA_5mC_peak_1223	PF3D7_0423800	CyRPA	cysteine-rich protective antigen
Pf3D7_04_v3	1081398	1082227	830	1081559	211	43.7288	3.08116	42.0823	CSA_5mC_peak_1224	PF3D7_0424000		Plasmodium exported protein (PHISTc), unknown function
Pf3D7_04_v3	1085694	1086158	465	1085861	149	14.5327	2.01847	13.4647	CSA_5mC_peak_1225	PF3D7_0424200	RH4	reticulocyte binding protein homologue 4
Pf3D7_04_v3	1086471	1087191	721	1086707	182	23.2242	2.30439	21.9818	CSA_5mC_peak_1226	PF3D7_0424200	RH4	reticulocyte binding protein homologue 4
Pf3D7_04_v3	1087506	1087765	260	1087643	138	9.40741	1.75304	8.45748	CSA_5mC_peak_1227	PF3D7_0424200	RH4	reticulocyte binding protein homologue 4
Pf3D7_04_v3	1088566	1089745	1180	1089112	223	42.7983	2.93249	41.1728	CSA_5mC_peak_1228	PF3D7_0424200	RH4	reticulocyte binding protein homologue 4
Pf3D7_04_v3	1093233	1093638	406	1093434	174	21.1672	2.24668	19.9645	CSA_5mC_peak_1229	intergenic
Pf3D7_04_v3	1093837	1094328	492	1094105	205	34.8121	2.70815	33.3498	CSA_5mC_peak_1230	intergenic
Pf3D7_04_v3	1094640	1095228	589	1094861	164	18.9642	2.18748	17.8058	CSA_5mC_peak_1231	intergenic
Pf3D7_04_v3	1096276	1097035	760	1096789	221	42.9591	2.9562	41.329	CSA_5mC_peak_1232	intergenic
Pf3D7_04_v3	1099954	1100604	651	1100485	127	7.95936	1.69696	7.04818	CSA_5mC_peak_1233	PF3D7_0424400	SURF4.2	surface-associated interspersed protein 4.2 (SURFIN 4.2)
Pf3D7_04_v3	1100899	1101468	570	1101228	284	84.9035	4.14212	82.1698	CSA_5mC_peak_1234	PF3D7_0424400	SURF4.2	surface-associated interspersed protein 4.2 (SURFIN 4.2)
Pf3D7_04_v3	1102215	1107059	4845	1105531	298	73.1743	3.52459	70.7667	CSA_5mC_peak_1235	PF3D7_0424400	SURF4.2	surface-associated interspersed protein 4.2 (SURFIN 4.2)
Pf3D7_04_v3	1110370	1111082	713	1110634	277	61.8256	3.2751	59.725	CSA_5mC_peak_1236	PF3D7_0424500	FIKK4.1	serine/threonine protein kinase, FIKK family
Pf3D7_04_v3	1118874	1120150	1277	1119205	229	50.8587	3.2439	49.0395	CSA_5mC_peak_1237	PF3D7_0424700	FIKK4.2	serine/threonine protein kinase, FIKK family
Pf3D7_04_v3	1121402	1121735	334	1121557	138	12.358	1.9413	11.3397	CSA_5mC_peak_1238	PF3D7_0424700	FIKK4.2	serine/threonine protein kinase, FIKK family
Pf3D7_04_v3	1122694	1123045	352	1122867	156	24.047	2.53186	22.7889	CSA_5mC_peak_1239	PF3D7_0424700	FIKK4.2	serine/threonine protein kinase, FIKK family
Pf3D7_04_v3	1128111	1128627	517	1128296	184	26.5495	2.45782	25.2437	CSA_5mC_peak_1240	PF3D7_0424900		Plasmodium exported protein (PHISTa), unknown function
Pf3D7_04_v3	1130207	1130652	446	1130430	190	27.0767	2.44437	25.7611	CSA_5mC_peak_1241	intergenic
Pf3D7_04_v3	1133404	1133716	313	1133549	175	27.1483	2.55344	25.8315	CSA_5mC_peak_1242	intergenic
Pf3D7_04_v3	1147059	1147474	416	1147296	119	10.8658	1.942	9.88094	CSA_5mC_peak_1243	PF3D7_0425500		stevor
Pf3D7_04_v3	1156636	1158008	1373	1156923	182	27.761	2.53316	26.432	CSA_5mC_peak_1244	PF3D7_0425800	VAR	erythrocyte membrane protein 1, PfEMP1
Pf3D7_04_v3	1158292	1158616	325	1158430	115	8.2176	1.76541	7.29912	CSA_5mC_peak_1245	PF3D7_0425800	VAR	erythrocyte membrane protein 1, PfEMP1
Pf3D7_04_v3	1159358	1159952	595	1159583	226	50.3505	3.24977	48.544	CSA_5mC_peak_1246	PF3D7_0425800	VAR	erythrocyte membrane protein 1, PfEMP1
Pf3D7_04_v3	1160056	1160425	370	1160253	183	30.1269	2.64732	28.7535	CSA_5mC_peak_1247	PF3D7_0425800	VAR	erythrocyte membrane protein 1, PfEMP1
Pf3D7_04_v3	1160623	1161981	1359	1161077	226	46.5238	3.0744	44.8122	CSA_5mC_peak_1248	PF3D7_0425800	VAR	erythrocyte membrane protein 1, PfEMP1
Pf3D7_04_v3	1162223	1166688	4466	1165531	269	79.1935	4.07945	76.6223	CSA_5mC_peak_1249	PF3D7_0425800	VAR	erythrocyte membrane protein 1, PfEMP1
Pf3D7_04_v3	1167294	1167744	451	1167538	176	31.8601	2.80005	30.4543	CSA_5mC_peak_1250	PF3D7_0425800	VAR	erythrocyte membrane protein 1, PfEMP1
Pf3D7_04_v3	1174430	1175551	1122	1174680	242	45.726	2.91071	44.0336	CSA_5mC_peak_1251	PF3D7_0426000	VAR	erythrocyte membrane protein 1, PfEMP1
Pf3D7_04_v3	1175684	1177392	1709	1176551	232	53.1393	3.31893	51.2618	CSA_5mC_peak_1252	PF3D7_0426000	VAR	erythrocyte membrane protein 1, PfEMP1
Pf3D7_04_v3	1177536	1179175	1640	1178299	203	40.1601	2.98173	38.5901	CSA_5mC_peak_1253	PF3D7_0426000	VAR	erythrocyte membrane protein 1, PfEMP1
Pf3D7_04_v3	1179361	1180445	1085	1179596	186	29.0917	2.57151	27.7377	CSA_5mC_peak_1254	PF3D7_0426000	VAR	erythrocyte membrane protein 1, PfEMP1
Pf3D7_04_v3	1189277	1192490	3214	1189513	245	52.907	3.18679	51.0364	CSA_5mC_peak_1255	intergenic
Pf3D7_04_v3	1194800	1195933	1134	1195594	231	55.5598	3.44177	53.619	CSA_5mC_peak_1256	intergenic
Pf3D7_04_v3	1195973	1199666	3694	1198782	268	70.7429	3.72059	68.402	CSA_5mC_peak_1257	intergenic
Pf3D7_04_v3	1199747	1200125	379	1199856	123	12.0962	2.00673	11.0819	CSA_5mC_peak_1258	intergenic
Pf3D7_05_v3	23602	27177	3576	25994	231	45.3142	2.97846	43.6314	CSA_5mC_peak_1259	PF3D7_0500100	VAR	erythrocyte membrane protein 1, PfEMP1
Pf3D7_05_v3	28365	28593	229	28417	100	5.8222	1.63452	4.97393	CSA_5mC_peak_1260	PF3D7_0500100	VAR	erythrocyte membrane protein 1, PfEMP1
Pf3D7_05_v3	30110	30556	447	30319	176	24.8421	2.42468	23.5687	CSA_5mC_peak_1261	intergenic
Pf3D7_05_v3	36662	37241	580	37006	230	47.3432	3.07604	45.6121	CSA_5mC_peak_1262	PF3D7_0500500	RIF	rifin
Pf3D7_05_v3	39503	39904	402	39673	149	14.6799	2.02717	13.6098	CSA_5mC_peak_1263	intergenic
Pf3D7_05_v3	43156	43456	301	43242	112	8.69461	1.81669	7.76314	CSA_5mC_peak_1264	PF3D7_0500800	MESA	mature parasite-infected erythrocyte surface antigen
Pf3D7_05_v3	43498	46730	3233	44637	347	96.3182	3.90673	93.2553	CSA_5mC_peak_1265	PF3D7_0500800	MESA	mature parasite-infected erythrocyte surface antigen
Pf3D7_05_v3	46997	47337	341	47145	214	52.3979	3.47942	50.5394	CSA_5mC_peak_1266	PF3D7_0500800	MESA	mature parasite-infected erythrocyte surface antigen
Pf3D7_05_v3	58853	59144	292	58982	142	18.6609	2.31422	17.5081	CSA_5mC_peak_1267	PF3D7_0501100	HSP40	heat shock protein 40, type II
Pf3D7_05_v3	63083	63349	267	63154	151	21.8891	2.44369	20.6722	CSA_5mC_peak_1268	PF3D7_0501200	PIESP2	parasite-infected erythrocyte surface protein
Pf3D7_05_v3	68964	69382	419	69155	198	33.5294	2.70019	32.0914	CSA_5mC_peak_1269	PF3D7_0501300	SBP1	skeleton-binding protein 1
Pf3D7_05_v3	69791	70207	417	69982	209	48.7328	3.3504	46.967	CSA_5mC_peak_1270	PF3D7_0501300	SBP1	skeleton-binding protein 1
Pf3D7_05_v3	75045	75437	393	75173	127	13.3813	2.07147	12.3381	CSA_5mC_peak_1271	PF3D7_0501400	FIRA	interspersed repeat antigen
Pf3D7_05_v3	75554	78803	3250	78192	274	88.705	4.44876	85.8656	CSA_5mC_peak_1272	PF3D7_0501400	FIRA	interspersed repeat antigen
Pf3D7_05_v3	79066	80025	960	79660	221	56.2726	3.59136	54.3146	CSA_5mC_peak_1273	PF3D7_0501400	FIRA	interspersed repeat antigen
Pf3D7_05_v3	83012	83330	319	83179	188	38.7949	3.05865	37.2527	CSA_5mC_peak_1274	intergenic
Pf3D7_05_v3	87932	88991	1060	88236	241	40.7749	2.71675	39.1924	CSA_5mC_peak_1275	PF3D7_0501700	APC3	anaphase-promoting complex subunit 3, putative
Pf3D7_05_v3	91525	92291	767	91930	172	25.1876	2.47106	23.9074	CSA_5mC_peak_1276	PF3D7_0501800	CAF1A	chromatin assembly factor 1 subunit A
Pf3D7_05_v3	92457	93051	595	92680	285	80.2499	3.9329	77.6466	CSA_5mC_peak_1277	PF3D7_0501800	CAF1A	chromatin assembly factor 1 subunit A
Pf3D7_05_v3	93454	94269	816	93605	190	30.0823	2.59164	28.7096	CSA_5mC_peak_1278	PF3D7_0501800	CAF1A	chromatin assembly factor 1 subunit A
Pf3D7_05_v3	100727	101089	363	100912	225	43.7519	2.95868	42.1049	CSA_5mC_peak_1279	PF3D7_0502000	VPS11	vacuolar protein sorting-associated protein 11, putative
Pf3D7_05_v3	102517	102821	305	102678	175	23.7304	2.37343	22.4785	CSA_5mC_peak_1280	PF3D7_0502100		HCNGP-like protein
Pf3D7_05_v3	107091	107936	846	107556	321	97.3225	4.20945	94.2303	CSA_5mC_peak_1281	PF3D7_0502300		conserved Plasmodium protein, unknown function
Pf3D7_05_v3	109163	109488	326	109352	194	41.4281	3.13581	39.831	CSA_5mC_peak_1282	intergenic
Pf3D7_05_v3	110779	111552	774	111178	201	34.3198	2.71515	32.8669	CSA_5mC_peak_1283	PF3D7_0502400	MSP8	merozoite surface protein 8
Pf3D7_05_v3	114971	115242	272	115038	136	9.62337	1.77476	8.66842	CSA_5mC_peak_1284	PF3D7_0502500		conserved Plasmodium protein, unknown function
Pf3D7_05_v3	116868	118307	1440	117736	274	73.3768	3.76715	70.9642	CSA_5mC_peak_1285	PF3D7_0502600		conserved Plasmodium protein, unknown function
Pf3D7_05_v3	118769	119255	487	119143	124	11.3777	1.95015	10.3809	CSA_5mC_peak_1286	PF3D7_0502600		conserved Plasmodium protein, unknown function
Pf3D7_05_v3	119688	119953	266	119837	120	10.9221	1.94034	9.93569	CSA_5mC_peak_1287	PF3D7_0502600		conserved Plasmodium protein, unknown function
Pf3D7_05_v3	120992	121479	488	121182	203	32.5927	2.61899	31.1725	CSA_5mC_peak_1288	PF3D7_0502700		conserved protein, unknown function
Pf3D7_05_v3	127638	128773	1136	128370	150	16.5103	2.12969	15.4013	CSA_5mC_peak_1289	PF3D7_0503100	IspE	4-diphosphocytidyl-2-C-methyl-D-erythritol kinase, putative
Pf3D7_05_v3	130429	131351	923	130629	279	85.7107	4.24183	82.9546	CSA_5mC_peak_1290	PF3D7_0503200	CDC6	cell division control protein 6, putative
Pf3D7_05_v3	131891	132238	348	132072	158	17.083	2.11728	15.9625	CSA_5mC_peak_1291	PF3D7_0503200	CDC6	cell division control protein 6, putative
Pf3D7_05_v3	134751	135817	1067	135027	264	70.8186	3.768	68.4761	CSA_5mC_peak_1292	PF3D7_0503300	SRSF12	serine/arginine-rich splicing factor 12
Pf3D7_05_v3	148131	148662	532	148526	167	22.7139	2.37264	21.4809	CSA_5mC_peak_1293	PF3D7_0503600	MyoB	myosin B
Pf3D7_05_v3	154655	155111	457	154920	219	45.5552	3.0931	43.8667	CSA_5mC_peak_1294	PF3D7_0503900		conserved Plasmodium protein, unknown function
Pf3D7_05_v3	155181	155452	272	155354	123	11.4143	1.95841	10.417	CSA_5mC_peak_1295	PF3D7_0503900		conserved Plasmodium protein, unknown function
Pf3D7_05_v3	158563	159159	597	158657	149	14.4942	2.0162	13.4271	CSA_5mC_peak_1296	PF3D7_0504000	ATPase3	cation transporting P-ATPase
Pf3D7_05_v3	159642	160083	442	159832	240	60.478	3.57247	58.4125	CSA_5mC_peak_1297	PF3D7_0504000	ATPase3	cation transporting P-ATPase
Pf3D7_05_v3	170281	170550	270	170455	114	6.11519	1.60611	5.25784	CSA_5mC_peak_1298	PF3D7_0504300		conserved Plasmodium protein, unknown function
Pf3D7_05_v3	172307	172755	449	172476	188	29.482	2.57643	28.1203	CSA_5mC_peak_1299	PF3D7_0504400		ATP-dependent helicase, putative
Pf3D7_05_v3	181611	181857	247	181724	140	12.3598	1.93152	11.3411	CSA_5mC_peak_1300	PF3D7_0504700	CEP120	centrosomal protein CEP120, putative
Pf3D7_05_v3	182030	182540	511	182246	216	48.8225	3.27867	47.0549	CSA_5mC_peak_1301	PF3D7_0504700	CEP120	centrosomal protein CEP120, putative
Pf3D7_05_v3	183054	183767	714	183546	274	88.7404	4.45042	85.8983	CSA_5mC_peak_1302	PF3D7_0504700	CEP120	centrosomal protein CEP120, putative
Pf3D7_05_v3	183831	184123	293	183945	164	27.6041	2.67025	26.278	CSA_5mC_peak_1303	PF3D7_0504700	CEP120	centrosomal protein CEP120, putative
Pf3D7_05_v3	184362	185074	713	184653	324	123.434	5.25959	119.443	CSA_5mC_peak_1304	PF3D7_0504700	CEP120	centrosomal protein CEP120, putative
Pf3D7_05_v3	185436	186501	1066	185665	271	86.7774	4.40187	83.9921	CSA_5mC_peak_1305	PF3D7_0504700	CEP120	centrosomal protein CEP120, putative
Pf3D7_05_v3	186860	187179	320	187023	135	14.9931	2.12792	13.9164	CSA_5mC_peak_1306	PF3D7_0504700	CEP120	centrosomal protein CEP120, putative
Pf3D7_05_v3	189117	189938	822	189691	171	20.0975	2.20817	18.916	CSA_5mC_peak_1307	PF3D7_0504800		conserved Plasmodium protein, unknown function
Pf3D7_05_v3	192890	193395	506	193216	145	9.28134	1.72002	8.33495	CSA_5mC_peak_1308	PF3D7_0504800		conserved Plasmodium protein, unknown function
Pf3D7_05_v3	193862	194557	696	194034	159	13.8589	1.9327	12.8064	CSA_5mC_peak_1309	PF3D7_0504800		conserved Plasmodium protein, unknown function
Pf3D7_05_v3	195336	195910	575	195705	230	43.5249	2.90882	41.8825	CSA_5mC_peak_1310	PF3D7_0504800		conserved Plasmodium protein, unknown function
Pf3D7_05_v3	197610	197935	326	197760	205	36.4484	2.78518	34.954	CSA_5mC_peak_1311	PF3D7_0504800		conserved Plasmodium protein, unknown function
Pf3D7_05_v3	198379	198787	409	198553	173	19.1464	2.14795	17.984	CSA_5mC_peak_1312	PF3D7_0504800		conserved Plasmodium protein, unknown function
Pf3D7_05_v3	199539	201421	1883	200739	284	74.9315	3.72576	72.4781	CSA_5mC_peak_1313	PF3D7_0504800		conserved Plasmodium protein, unknown function
Pf3D7_05_v3	201786	202054	269	201933	161	19.606	2.24065	18.4345	CSA_5mC_peak_1314	PF3D7_0504800		conserved Plasmodium protein, unknown function
Pf3D7_05_v3	202483	202822	340	202672	177	21.1345	2.22801	19.9324	CSA_5mC_peak_1315	PF3D7_0504800		conserved Plasmodium protein, unknown function
Pf3D7_05_v3	203297	203547	251	203449	132	7.22816	1.62901	6.33795	CSA_5mC_peak_1316	PF3D7_0504800		conserved Plasmodium protein, unknown function
Pf3D7_05_v3	204050	204403	354	204199	144	12.7215	1.9346	11.6932	CSA_5mC_peak_1317	PF3D7_0504800		conserved Plasmodium protein, unknown function
Pf3D7_05_v3	208315	208628	314	208449	187	28.8265	2.55094	27.4776	CSA_5mC_peak_1318	PF3D7_0504900		transmembrane protein TMEM222, putative
Pf3D7_05_v3	209612	210004	393	209801	230	44.8337	2.96562	43.1621	CSA_5mC_peak_1319	PF3D7_0505000		MMS19-like protein, putative
Pf3D7_05_v3	210078	210449	372	210261	146	14.6172	2.03934	13.548	CSA_5mC_peak_1320	PF3D7_0505000		MMS19-like protein, putative
Pf3D7_05_v3	211942	212447	506	212259	237	46.36	2.97539	44.6526	CSA_5mC_peak_1321	PF3D7_0505000		MMS19-like protein, putative
Pf3D7_05_v3	213035	213436	402	213214	184	23.8762	2.32491	22.6211	CSA_5mC_peak_1322	PF3D7_0505000		MMS19-like protein, putative
Pf3D7_05_v3	215068	215685	618	215234	207	35.6976	2.73444	34.2183	CSA_5mC_peak_1323	PF3D7_0505000		MMS19-like protein, putative
Pf3D7_05_v3	217025	217530	506	217158	174	24.947	2.44399	23.6718	CSA_5mC_peak_1324	PF3D7_0505000		MMS19-like protein, putative
Pf3D7_05_v3	217864	218182	319	218010	180	27.375	2.52788	26.0535	CSA_5mC_peak_1325	PF3D7_0505000		MMS19-like protein, putative
Pf3D7_05_v3	222233	222588	356	222400	154	17.1833	2.14558	16.0612	CSA_5mC_peak_1326	PF3D7_0505100	TRS85	trafficking protein particle complex subunit 8, putative
Pf3D7_05_v3	222856	223285	430	223046	247	51.2575	3.1004	49.4284	CSA_5mC_peak_1327	PF3D7_0505100	TRS85	trafficking protein particle complex subunit 8, putative
Pf3D7_05_v3	223823	224360	538	223963	160	15.1437	1.99927	14.0628	CSA_5mC_peak_1328	PF3D7_0505100	TRS85	trafficking protein particle complex subunit 8, putative
Pf3D7_05_v3	226247	226613	367	226428	144	14.5468	2.04597	13.4786	CSA_5mC_peak_1329	PF3D7_0505100	TRS85	trafficking protein particle complex subunit 8, putative
Pf3D7_05_v3	228696	229159	464	228911	306	80.0591	3.70837	77.4614	CSA_5mC_peak_1330	PF3D7_0505100	TRS85	trafficking protein particle complex subunit 8, putative
Pf3D7_05_v3	233249	233670	422	233454	147	17.8952	2.23131	16.7584	CSA_5mC_peak_1331	PF3D7_0505300		UDP-N-acetylglucosamine transporter, putative
Pf3D7_05_v3	236045	236772	728	236586	172	22.3992	2.32299	21.1725	CSA_5mC_peak_1332	PF3D7_0505400		conserved protein, unknown function
Pf3D7_05_v3	236843	237518	676	237032	187	29.399	2.57961	28.0388	CSA_5mC_peak_1333	PF3D7_0505400		conserved protein, unknown function
Pf3D7_05_v3	240823	241231	409	241105	128	8.7348	1.74713	7.80244	CSA_5mC_peak_1334	PF3D7_0505500	MSH6	DNA mismatch repair protein MSH6, putative
Pf3D7_05_v3	242851	243318	468	243097	208	39.6465	2.91234	38.0874	CSA_5mC_peak_1335	PF3D7_0505500	MSH6	DNA mismatch repair protein MSH6, putative
Pf3D7_05_v3	243484	243851	368	243653	201	41.3505	3.06018	39.755	CSA_5mC_peak_1336	PF3D7_0505500	MSH6	DNA mismatch repair protein MSH6, putative
Pf3D7_05_v3	249098	250533	1436	249586	305	109.67	4.94488	106.181	CSA_5mC_peak_1337	PF3D7_0505700		conserved Plasmodium membrane protein, unknown function
Pf3D7_05_v3	267048	268388	1341	267557	204	36.7647	2.80824	35.2645	CSA_5mC_peak_1338	PF3D7_0506500		conserved Plasmodium protein, unknown function
Pf3D7_05_v3	269642	271269	1628	270465	294	90.473	4.25532	87.5836	CSA_5mC_peak_1339	PF3D7_0506500		conserved Plasmodium protein, unknown function
Pf3D7_05_v3	274152	274566	415	274275	210	34.136	2.64107	32.6868	CSA_5mC_peak_1340	PF3D7_0506500		conserved Plasmodium protein, unknown function
Pf3D7_05_v3	275878	277719	1842	276673	296	97.1271	4.51677	94.0407	CSA_5mC_peak_1341	PF3D7_0506500		conserved Plasmodium protein, unknown function
Pf3D7_05_v3	277995	278242	248	278162	109	6.10062	1.62292	5.24377	CSA_5mC_peak_1342	PF3D7_0506500		conserved Plasmodium protein, unknown function
Pf3D7_05_v3	279374	279601	228	279519	143	17.2474	2.21845	16.1235	CSA_5mC_peak_1343	intergenic
Pf3D7_05_v3	282703	283075	373	282863	209	42.1049	3.0214	40.4941	CSA_5mC_peak_1344	PF3D7_0506700		GTPase-activating protein, putative
Pf3D7_05_v3	283726	284025	300	283879	202	45.9405	3.28522	44.2426	CSA_5mC_peak_1345	PF3D7_0506800	TCF25	transcription factor 25, putative
Pf3D7_05_v3	284712	285289	578	285103	270	86.1262	4.38568	83.3593	CSA_5mC_peak_1346	PF3D7_0506800	TCF25	transcription factor 25, putative
Pf3D7_05_v3	286037	286406	370	286199	186	21.9832	2.22133	20.7645	CSA_5mC_peak_1347	PF3D7_0506800	TCF25	transcription factor 25, putative
Pf3D7_05_v3	289094	289588	495	289353	175	29.1171	2.6592	27.7625	CSA_5mC_peak_1348	PF3D7_0506900	ROM4	rhomboid protease ROM4
Pf3D7_05_v3	289664	289949	286	289796	126	7.60496	1.67556	6.70351	CSA_5mC_peak_1349	PF3D7_0506900	ROM4	rhomboid protease ROM4
Pf3D7_05_v3	290393	291081	689	290858	203	40.4351	2.99532	38.8591	CSA_5mC_peak_1350	PF3D7_0506900	ROM4	rhomboid protease ROM4
Pf3D7_05_v3	294714	295779	1066	295591	204	46.996	3.31758	45.2731	CSA_5mC_peak_1351	PF3D7_0507100	RPL4	60S ribosomal protein L4
Pf3D7_05_v3	299107	299394	288	299179	114	7.16354	1.68854	6.27494	CSA_5mC_peak_1352	PF3D7_0507200	SUB3	subtilisin-like protease 3
Pf3D7_05_v3	300153	300747	595	300458	278	85.2805	4.23584	82.537	CSA_5mC_peak_1353	PF3D7_0507200	SUB3	subtilisin-like protease 3
Pf3D7_05_v3	300881	301327	447	301106	218	54.6154	3.54415	52.6995	CSA_5mC_peak_1354	PF3D7_0507200	SUB3	subtilisin-like protease 3
Pf3D7_05_v3	301880	302408	529	302125	299	85.6037	3.99486	82.8501	CSA_5mC_peak_1355	PF3D7_0507300	SOPT	subtilisin-like ookinete protein SOPT
Pf3D7_05_v3	302585	302930	346	302771	179	22.5921	2.29032	21.3612	CSA_5mC_peak_1356	PF3D7_0507300	SOPT	subtilisin-like ookinete protein SOPT
Pf3D7_05_v3	305562	305805	244	305697	134	8.8726	1.73316	7.93626	CSA_5mC_peak_1357	PF3D7_0507400	SUB1-ProM	subtilisin propeptide-like protein
Pf3D7_05_v3	308158	308397	240	308219	134	4.45105	1.42602	3.64986	CSA_5mC_peak_1358	PF3D7_0507500	SUB1	subtilisin-like protease 1
Pf3D7_05_v3	308674	309488	815	309307	198	38.0441	2.92227	36.5176	CSA_5mC_peak_1359	PF3D7_0507500	SUB1	subtilisin-like protease 1
Pf3D7_05_v3	310502	310750	249	310620	146	20.1853	2.37895	19.0015	CSA_5mC_peak_1360	intergenic
Pf3D7_05_v3	314640	314910	271	314765	134	9.35101	1.76483	8.40292	CSA_5mC_peak_1361	PF3D7_0507600	CAF40	protein CAF40, putative
Pf3D7_05_v3	315336	315637	302	315488	179	34.4352	2.913	32.9796	CSA_5mC_peak_1362	PF3D7_0507600	CAF40	protein CAF40, putative
Pf3D7_05_v3	317882	318265	384	318063	224	38.0723	2.71786	36.5452	CSA_5mC_peak_1363	PF3D7_0507700	NPL4	nuclear protein localization protein 4, putative
Pf3D7_05_v3	322698	323480	783	322906	245	64.8242	3.71684	62.6435	CSA_5mC_peak_1364	PF3D7_0507800		conserved protein, unknown function
Pf3D7_05_v3	324373	324675	303	324505	122	10.1864	1.87649	9.2178	CSA_5mC_peak_1365	PF3D7_0507800		conserved protein, unknown function
Pf3D7_05_v3	325040	325778	739	325393	187	36.5177	2.94695	35.022	CSA_5mC_peak_1366	PF3D7_0507800		conserved protein, unknown function
Pf3D7_05_v3	331860	332426	567	332175	226	47.3012	3.10961	45.5711	CSA_5mC_peak_1367	PF3D7_0508100	SET9	SET domain protein, putative
Pf3D7_05_v3	333209	333605	397	333344	119	5.84657	1.56874	4.99746	CSA_5mC_peak_1368	PF3D7_0508100	SET9	SET domain protein, putative
Pf3D7_05_v3	334685	335473	789	335151	207	48.5949	3.36613	46.8327	CSA_5mC_peak_1369	PF3D7_0508100	SET9	SET domain protein, putative
Pf3D7_05_v3	336345	336676	332	336497	139	17.549	2.26567	16.4188	CSA_5mC_peak_1370	PF3D7_0508100	SET9	SET domain protein, putative
Pf3D7_05_v3	345975	346800	826	346364	236	43.5063	2.86281	41.8644	CSA_5mC_peak_1371	PF3D7_0508400		conserved protein, unknown function
Pf3D7_05_v3	349811	350334	524	350152	212	46.0856	3.18601	44.3843	CSA_5mC_peak_1372	PF3D7_0508500	ND6	ND6 protein, putative
Pf3D7_05_v3	352082	352792	711	352419	209	35.7183	2.72043	34.2384	CSA_5mC_peak_1373	PF3D7_0508500	ND6	ND6 protein, putative
Pf3D7_05_v3	353319	353750	432	353647	116	5.96566	1.58755	5.1131	CSA_5mC_peak_1374	PF3D7_0508500	ND6	ND6 protein, putative
Pf3D7_05_v3	353964	354836	873	354475	180	34.9102	2.92918	33.4455	CSA_5mC_peak_1375	PF3D7_0508500	ND6	ND6 protein, putative
Pf3D7_05_v3	356270	356992	723	356707	216	52.3806	3.45505	50.5236	CSA_5mC_peak_1376	PF3D7_0508600		conserved protein, unknown function
Pf3D7_05_v3	358255	360397	2143	358798	277	80.8771	4.0539	78.2551	CSA_5mC_peak_1377	PF3D7_0508700	PRP5	pre-mRNA-processing ATP-dependent RNA helicase PRP5, putative
Pf3D7_05_v3	361623	361859	237	361751	136	9.13915	1.74319	8.19604	CSA_5mC_peak_1378	PF3D7_0508700	PRP5	pre-mRNA-processing ATP-dependent RNA helicase PRP5, putative
Pf3D7_05_v3	363891	364253	363	364058	167	14.7539	1.94713	13.6824	CSA_5mC_peak_1379	PF3D7_0508800	SSB	single-stranded DNA-binding protein
Pf3D7_05_v3	365210	365532	323	365333	97	5.15544	1.58597	4.3289	CSA_5mC_peak_1380	PF3D7_0508800	SSB	single-stranded DNA-binding protein
Pf3D7_05_v3	369109	370058	950	369459	260	78.5565	4.16937	76.0054	CSA_5mC_peak_1381	PF3D7_0508900	AAP6	protein AAP6
Pf3D7_05_v3	371424	371732	309	371550	178	21.4379	2.23779	20.2295	CSA_5mC_peak_1382	PF3D7_0508900	AAP6	protein AAP6
Pf3D7_05_v3	372219	372498	280	372366	152	14.5996	2.00719	13.5305	CSA_5mC_peak_1383	PF3D7_0508900	AAP6	protein AAP6
Pf3D7_05_v3	373193	373437	245	373368	145	15.6014	2.10457	14.5115	CSA_5mC_peak_1384	PF3D7_0508900	AAP6	protein AAP6
Pf3D7_05_v3	374261	375810	1550	374482	275	71.2207	3.66681	68.8674	CSA_5mC_peak_1385	PF3D7_0508900	AAP6	protein AAP6
Pf3D7_05_v3	380946	382265	1320	381779	264	60.7	3.34214	58.6291	CSA_5mC_peak_1386	PF3D7_0509100	SMC4	structural maintenance of chromosomes protein 4, putative
Pf3D7_05_v3	382509	383251	743	383083	204	29.1792	2.45554	27.8235	CSA_5mC_peak_1387	PF3D7_0509100	SMC4	structural maintenance of chromosomes protein 4, putative
Pf3D7_05_v3	383660	385740	2081	384839	262	62.5872	3.43815	60.4661	CSA_5mC_peak_1388	PF3D7_0509100	SMC4	structural maintenance of chromosomes protein 4, putative
Pf3D7_05_v3	388647	388974	328	388800	208	44.2821	3.1374	42.6231	CSA_5mC_peak_1389	PF3D7_0509300		conserved Plasmodium protein, unknown function
Pf3D7_05_v3	391383	391919	537	391673	223	43.7674	2.97596	42.12	CSA_5mC_peak_1390	PF3D7_0509400	RNAPI	RNA polymerase I
Pf3D7_05_v3	394084	394327	244	394199	134	9.05876	1.7455	8.11818	CSA_5mC_peak_1391	PF3D7_0509400	RNAPI	RNA polymerase I
Pf3D7_05_v3	397455	397929	475	397676	234	43.7385	2.88741	42.0918	CSA_5mC_peak_1392	PF3D7_0509400	RNAPI	RNA polymerase I
Pf3D7_05_v3	398106	398394	289	398275	146	10.2478	1.77567	9.27805	CSA_5mC_peak_1393	PF3D7_0509400	RNAPI	RNA polymerase I
Pf3D7_05_v3	400040	400357	318	400186	216	49.7188	3.32261	47.928	CSA_5mC_peak_1394	intergenic
Pf3D7_05_v3	401654	402016	363	401842	167	28.2378	2.67964	26.8998	CSA_5mC_peak_1395	PF3D7_0509500		ERCC4 domain-containing protein, putative
Pf3D7_05_v3	410307	411327	1021	410550	229	60.5154	3.70434	58.4488	CSA_5mC_peak_1396	PF3D7_0509800	PI4KB	phosphatidylinositol 4-kinase beta
Pf3D7_05_v3	412934	413671	738	413197	259	49.5899	2.94191	47.803	CSA_5mC_peak_1397	PF3D7_0509800	PI4KB	phosphatidylinositol 4-kinase beta
Pf3D7_05_v3	414000	414255	256	414107	142	9.94887	1.77224	8.98625	CSA_5mC_peak_1398	PF3D7_0509800	PI4KB	phosphatidylinositol 4-kinase beta
Pf3D7_05_v3	419329	419637	309	419479	165	28.0419	2.68643	26.7073	CSA_5mC_peak_1399	PF3D7_0510000		conserved Plasmodium protein, unknown function
Pf3D7_05_v3	424944	425696	753	425175	167	19.5027	2.19937	18.333	CSA_5mC_peak_1400	PF3D7_0510100		KH domain-containing protein, putative
Pf3D7_05_v3	426943	427364	422	427161	252	65.7169	3.67704	63.5117	CSA_5mC_peak_1401	PF3D7_0510100		KH domain-containing protein, putative
Pf3D7_05_v3	428134	428522	389	428359	184	22.8225	2.27307	21.5876	CSA_5mC_peak_1402	PF3D7_0510100		KH domain-containing protein, putative
Pf3D7_05_v3	428758	429121	364	428979	176	23.5374	2.35697	22.2888	CSA_5mC_peak_1403	PF3D7_0510100		KH domain-containing protein, putative
Pf3D7_05_v3	437577	438092	516	437823	230	53.4355	3.35294	51.5513	CSA_5mC_peak_1404	PF3D7_0510200	CYP87	peptidyl-prolyl cis-trans isomerase
Pf3D7_05_v3	445007	445355	349	445159	171	20.839	2.24705	19.6427	CSA_5mC_peak_1405	PF3D7_0510400		PDCD2 domain-containing protein, putative
Pf3D7_05_v3	447459	447901	443	447678	210	32.9902	2.58942	31.5631	CSA_5mC_peak_1406	PF3D7_0510500	TopoI	topoisomerase I
Pf3D7_05_v3	447965	448461	497	448258	339	108.895	4.44476	105.434	CSA_5mC_peak_1407	PF3D7_0510500	TopoI	topoisomerase I
Pf3D7_05_v3	448928	449289	362	449117	241	52.4542	3.20289	50.594	CSA_5mC_peak_1408	intergenic
Pf3D7_05_v3	460902	461252	351	461114	201	35.6252	2.77779	34.1471	CSA_5mC_peak_1409	PF3D7_0510800		WD repeat-containing protein, putative
Pf3D7_05_v3	467748	467991	244	467924	126	4.10167	1.41463	3.31384	CSA_5mC_peak_1410	PF3D7_0511000	TCTP	translationally-controlled tumor protein homolog
Pf3D7_05_v3	471362	471706	345	471535	247	51.9474	3.12917	50.1001	CSA_5mC_peak_1411	PF3D7_0511200	SCD	stearoyl-CoA desaturase
Pf3D7_05_v3	476262	476652	391	476452	165	15.6791	2.00518	14.588	CSA_5mC_peak_1412	PF3D7_0511300		MORN repeat protein, putative
Pf3D7_05_v3	479846	480078	233	479957	151	19.9447	2.32684	18.7662	CSA_5mC_peak_1413	intergenic
Pf3D7_05_v3	482005	482496	492	482244	253	51.013	3.04247	49.1908	CSA_5mC_peak_1414	PF3D7_0511400		conserved Plasmodium protein, unknown function
Pf3D7_05_v3	487216	488202	987	487552	255	60.7956	3.43015	58.7224	CSA_5mC_peak_1415	PF3D7_0511500		RNA pseudouridylate synthase, putative
Pf3D7_05_v3	489602	490261	660	489845	322	103.032	4.42232	99.7698	CSA_5mC_peak_1416	PF3D7_0511500		RNA pseudouridylate synthase, putative
Pf3D7_05_v3	491424	492051	628	491630	250	51.6567	3.0924	49.8174	CSA_5mC_peak_1417	PF3D7_0511500		RNA pseudouridylate synthase, putative
Pf3D7_05_v3	493166	493394	229	493252	122	6.81649	1.63239	5.93781	CSA_5mC_peak_1418	PF3D7_0511500		RNA pseudouridylate synthase, putative
Pf3D7_05_v3	493676	494699	1024	494036	236	47.7445	3.04265	46.0038	CSA_5mC_peak_1419	PF3D7_0511500		RNA pseudouridylate synthase, putative
Pf3D7_05_v3	495890	496327	438	496133	184	25.6904	2.41487	24.4006	CSA_5mC_peak_1420	PF3D7_0511500		RNA pseudouridylate synthase, putative
Pf3D7_05_v3	498587	498958	372	498773	198	22.4378	2.18264	21.2104	CSA_5mC_peak_1421	PF3D7_0511500		RNA pseudouridylate synthase, putative
Pf3D7_05_v3	500376	500759	384	500533	206	21.9246	2.12383	20.7072	CSA_5mC_peak_1422	PF3D7_0511500		RNA pseudouridylate synthase, putative
Pf3D7_05_v3	502751	503268	518	503053	159	17.0115	2.10783	15.8924	CSA_5mC_peak_1423	PF3D7_0511500		RNA pseudouridylate synthase, putative
Pf3D7_05_v3	503607	505278	1672	503871	315	94.535	4.16911	91.5253	CSA_5mC_peak_1424	PF3D7_0511500		RNA pseudouridylate synthase, putative
Pf3D7_05_v3	505604	506026	423	505783	223	41.5228	2.87576	39.924	CSA_5mC_peak_1425	PF3D7_0511500		RNA pseudouridylate synthase, putative
Pf3D7_05_v3	507930	508182	253	508069	138	10.1497	1.80067	9.18187	CSA_5mC_peak_1426	PF3D7_0511500		RNA pseudouridylate synthase, putative
Pf3D7_05_v3	509171	510565	1395	509929	298	80.5219	3.80448	77.9099	CSA_5mC_peak_1427	PF3D7_0511500		RNA pseudouridylate synthase, putative
Pf3D7_05_v3	511069	512202	1134	511288	285	77.2279	3.80843	74.7138	CSA_5mC_peak_1428	PF3D7_0511500		RNA pseudouridylate synthase, putative
Pf3D7_05_v3	512427	512777	351	512601	211	32.0742	2.54203	30.6644	CSA_5mC_peak_1429	PF3D7_0511500		RNA pseudouridylate synthase, putative
Pf3D7_05_v3	512978	513516	539	513119	149	12.0835	1.8738	11.0702	CSA_5mC_peak_1430	PF3D7_0511500		RNA pseudouridylate synthase, putative
Pf3D7_05_v3	514097	514884	788	514590	221	34.7209	2.59401	33.2603	CSA_5mC_peak_1431	PF3D7_0511500		RNA pseudouridylate synthase, putative
Pf3D7_05_v3	516157	516437	281	516277	141	14.0142	2.02966	12.958	CSA_5mC_peak_1432	PF3D7_0511500		RNA pseudouridylate synthase, putative
Pf3D7_05_v3	516556	516819	264	516726	121	8.55771	1.76388	7.63036	CSA_5mC_peak_1433	PF3D7_0511500		RNA pseudouridylate synthase, putative
Pf3D7_05_v3	521134	521423	290	521260	165	27.3791	2.64841	26.0575	CSA_5mC_peak_1434	PF3D7_0511800	INO1	inositol-3-phosphate synthase
Pf3D7_05_v3	522098	522649	552	522461	216	37.7547	2.76111	36.2344	CSA_5mC_peak_1435	PF3D7_0511800	INO1	inositol-3-phosphate synthase
Pf3D7_05_v3	531289	531532	244	531463	147	9.54456	1.72934	8.59148	CSA_5mC_peak_1436	PF3D7_0512200	GS	glutathione synthetase
Pf3D7_05_v3	533762	534109	348	533948	186	28.8961	2.56166	27.5461	CSA_5mC_peak_1437	PF3D7_0512300	MAT1	CDK-activating kinase assembly factor MAT1
Pf3D7_05_v3	536041	536797	757	536288	203	34.6694	2.71651	33.2095	CSA_5mC_peak_1438	PF3D7_0512400		conserved Plasmodium protein, unknown function
Pf3D7_05_v3	545715	545994	280	545856	127	11.6008	1.94898	10.598	CSA_5mC_peak_1439	PF3D7_0512600	RAB1b	ras-related protein Rab-1B
Pf3D7_05_v3	547336	547580	245	547454	138	13.9259	2.04093	12.8708	CSA_5mC_peak_1440	PF3D7_0512700	OPRT	orotate phosphoribosyltransferase
Pf3D7_05_v3	550781	551724	944	550997	233	44.5351	2.92896	42.8702	CSA_5mC_peak_1441	PF3D7_0512800		conserved Plasmodium protein, unknown function
Pf3D7_05_v3	552939	553340	402	553217	140	14.8258	2.08617	13.7517	CSA_5mC_peak_1442	PF3D7_0512800		conserved Plasmodium protein, unknown function
Pf3D7_05_v3	559846	560261	416	560051	173	26.7811	2.54918	25.4707	CSA_5mC_peak_1443	PF3D7_0513200		CPSF domain-containing protein, putative
Pf3D7_05_v3	561452	562358	907	561868	253	66.7573	3.71255	64.5263	CSA_5mC_peak_1444	PF3D7_0513200		CPSF domain-containing protein, putative
Pf3D7_05_v3	565969	566364	396	566187	162	23.6549	2.461	22.4045	CSA_5mC_peak_1445	PF3D7_0513200		CPSF domain-containing protein, putative
Pf3D7_05_v3	569534	569807	274	569694	138	11.8881	1.91145	10.8787	CSA_5mC_peak_1446	PF3D7_0513300	PNP	purine nucleoside phosphorylase
Pf3D7_05_v3	576822	577076	255	576996	104	6.76843	1.69925	5.89119	CSA_5mC_peak_1447	PF3D7_0513600		deoxyribodipyrimidine photo-lyase, putative
Pf3D7_05_v3	577311	578503	1193	577773	285	96.0582	4.62844	93.0028	CSA_5mC_peak_1448	PF3D7_0513600		deoxyribodipyrimidine photo-lyase, putative
Pf3D7_05_v3	581085	581364	280	581224	158	22.6604	2.43454	21.4285	CSA_5mC_peak_1449	PF3D7_0513700	PSOP12	secreted ookinete protein, putative
Pf3D7_05_v3	581851	582119	269	582039	117	10.2716	1.90963	9.30089	CSA_5mC_peak_1450	PF3D7_0513700	PSOP12	secreted ookinete protein, putative
Pf3D7_05_v3	585546	585785	240	585689	116	8.37134	1.77248	7.44842	CSA_5mC_peak_1451	PF3D7_0513800	RAB1a	ras-related protein Rab-1A
Pf3D7_05_v3	591713	592444	732	592258	154	17.5162	2.16476	16.3872	CSA_5mC_peak_1452	PF3D7_0514100	UvrD	ATP-dependent DNA helicase UvrD
Pf3D7_05_v3	593598	594127	530	593896	251	57.8045	3.34088	55.8077	CSA_5mC_peak_1453	PF3D7_0514100	UvrD	ATP-dependent DNA helicase UvrD
Pf3D7_05_v3	597697	598050	354	597871	177	28.5717	2.61356	27.2272	CSA_5mC_peak_1454	PF3D7_0514200		conserved Plasmodium protein, unknown function
Pf3D7_05_v3	601212	601607	396	601421	195	38.6887	2.98293	37.1495	CSA_5mC_peak_1455	PF3D7_0514300		aspartate--tRNA ligase, putative
Pf3D7_05_v3	610685	611239	555	610993	149	17.898	2.21829	16.7613	CSA_5mC_peak_1456	PF3D7_0514700		MORN repeat protein, putative
Pf3D7_05_v3	612811	613089	279	612972	165	17.6733	2.11219	16.5407	CSA_5mC_peak_1457	PF3D7_0514700		MORN repeat protein, putative
Pf3D7_05_v3	613896	614519	624	614340	216	42.3923	2.97263	40.7744	CSA_5mC_peak_1458	PF3D7_0514700		MORN repeat protein, putative
Pf3D7_05_v3	617743	618082	340	617931	179	29.9666	2.67139	28.5959	CSA_5mC_peak_1459	PF3D7_0514800		inositol polyphosphate multikinase, putative
Pf3D7_05_v3	619551	619795	245	619690	129	11.4368	1.92706	10.4393	CSA_5mC_peak_1460	PF3D7_0514900		conserved Plasmodium protein, unknown function
Pf3D7_05_v3	622229	623363	1135	623072	347	120.995	4.81325	117.092	CSA_5mC_peak_1461	PF3D7_0515000	CWC2	pre-mRNA-splicing factor CWC2, putative
Pf3D7_05_v3	626116	626351	236	626214	130	9.54884	1.79454	8.59558	CSA_5mC_peak_1462	PF3D7_0515100	ROM9	rhomboid protease ROM9
Pf3D7_05_v3	629597	630010	414	629820	178	26.0916	2.47578	24.7943	CSA_5mC_peak_1463	PF3D7_0515300	PI3K	phosphatidylinositol 3-kinase
Pf3D7_05_v3	630311	630925	615	630709	194	37.6508	2.93919	36.1327	CSA_5mC_peak_1464	PF3D7_0515300	PI3K	phosphatidylinositol 3-kinase
Pf3D7_05_v3	631680	632134	455	631971	156	19.2616	2.25278	18.0971	CSA_5mC_peak_1465	PF3D7_0515300	PI3K	phosphatidylinositol 3-kinase
Pf3D7_05_v3	633099	633358	260	633206	149	14.0986	1.99283	13.0409	CSA_5mC_peak_1466	PF3D7_0515300	PI3K	phosphatidylinositol 3-kinase
Pf3D7_05_v3	636853	637138	286	636981	170	29.9597	2.74986	28.5891	CSA_5mC_peak_1467	PF3D7_0515400		conserved protein, unknown function
Pf3D7_05_v3	638389	639320	932	639115	177	18.197	2.07988	17.0542	CSA_5mC_peak_1468	PF3D7_0515400		conserved protein, unknown function
Pf3D7_05_v3	639881	640122	242	639988	139	8.9529	1.72016	8.01467	CSA_5mC_peak_1469	PF3D7_0515400		conserved protein, unknown function
Pf3D7_05_v3	640579	640862	284	640700	150	20.0061	2.33777	18.8264	CSA_5mC_peak_1470	intergenic
Pf3D7_05_v3	646699	647046	348	646896	201	34.3198	2.71515	32.8669	CSA_5mC_peak_1471	PF3D7_0515600	GEP	gamete egress protein GEP, putative
Pf3D7_05_v3	648108	648666	559	648400	265	69.8522	3.71501	67.5362	CSA_5mC_peak_1472	PF3D7_0515600	GEP	gamete egress protein GEP, putative
Pf3D7_05_v3	656350	656593	244	656423	116	9.97988	1.89345	9.01603	CSA_5mC_peak_1473	intergenic
Pf3D7_05_v3	664123	664619	497	664367	276	67.9648	3.52455	65.6999	CSA_5mC_peak_1474	PF3D7_0516000		RAP protein, putative
Pf3D7_05_v3	665248	665509	262	665400	132	10.3731	1.84104	9.39986	CSA_5mC_peak_1475	PF3D7_0516000		RAP protein, putative
Pf3D7_05_v3	676139	676397	259	676261	134	15.757	2.18475	14.6632	CSA_5mC_peak_1476	PF3D7_0516200	RPS11	40S ribosomal protein S11
Pf3D7_05_v3	681322	681550	229	681461	135	11.1926	1.88104	10.1997	CSA_5mC_peak_1477	PF3D7_0516300		tRNA pseudouridine synthase, putative
Pf3D7_05_v3	682054	682367	314	682235	114	9.40724	1.86108	8.45743	CSA_5mC_peak_1478	PF3D7_0516400	PhLP1	phosducin-like protein 1, putative
Pf3D7_05_v3	685146	685561	416	685322	214	44.2511	3.07798	42.5928	CSA_5mC_peak_1479	PF3D7_0516500	MFS1	major facilitator superfamily domain-containing protein, putative
Pf3D7_05_v3	686553	687101	549	686740	218	54.5133	3.53899	52.6003	CSA_5mC_peak_1480	PF3D7_0516600	MB2	sporozoite surface antigen MB2
Pf3D7_05_v3	687440	687771	332	687594	145	11.9627	1.88384	10.9524	CSA_5mC_peak_1481	PF3D7_0516600	MB2	sporozoite surface antigen MB2
Pf3D7_05_v3	688488	689311	824	689157	203	41.5925	3.05285	39.9922	CSA_5mC_peak_1482	PF3D7_0516600	MB2	sporozoite surface antigen MB2
Pf3D7_05_v3	690587	691342	756	691027	218	44.3269	3.04493	42.6673	CSA_5mC_peak_1483	PF3D7_0516600	MB2	sporozoite surface antigen MB2
Pf3D7_05_v3	695415	696153	739	695592	197	43.3392	3.2043	41.7006	CSA_5mC_peak_1484	PF3D7_0516700		ubiquitin carboxyl-terminal hydrolase 2, putative
Pf3D7_05_v3	701436	701954	519	701750	157	18.1346	2.18229	16.9929	CSA_5mC_peak_1485	PF3D7_0516800	ApiAP2	AP2 domain transcription factor AP2-O2, putative
Pf3D7_05_v3	702130	702409	280	702283	174	20.78	2.2267	19.5848	CSA_5mC_peak_1486	PF3D7_0516800	ApiAP2	AP2 domain transcription factor AP2-O2, putative
Pf3D7_05_v3	702688	703008	321	702832	178	25.198	2.42955	23.9176	CSA_5mC_peak_1487	PF3D7_0516800	ApiAP2	AP2 domain transcription factor AP2-O2, putative
Pf3D7_05_v3	703786	704249	464	704029	190	39.4977	3.07542	37.9414	CSA_5mC_peak_1488	PF3D7_0516800	ApiAP2	AP2 domain transcription factor AP2-O2, putative
Pf3D7_05_v3	704563	705307	745	704978	311	77.1972	3.55844	74.6851	CSA_5mC_peak_1489	PF3D7_0516800	ApiAP2	AP2 domain transcription factor AP2-O2, putative
Pf3D7_05_v3	705522	706259	738	706013	170	15.0528	1.9503	13.9754	CSA_5mC_peak_1490	PF3D7_0516800	ApiAP2	AP2 domain transcription factor AP2-O2, putative
Pf3D7_05_v3	711095	711337	243	711240	123	12.0962	2.00673	11.0819	CSA_5mC_peak_1491	intergenic
Pf3D7_05_v3	712570	712854	285	712663	144	19.4172	2.34658	18.2492	CSA_5mC_peak_1492	PF3D7_0516900	RPL2	60S ribosomal protein L2
Pf3D7_05_v3	713219	713453	235	713350	113	6.09325	1.60785	5.23654	CSA_5mC_peak_1493	PF3D7_0516900	RPL2	60S ribosomal protein L2
Pf3D7_05_v3	719449	719822	374	719623	192	28.0358	2.47777	26.7021	CSA_5mC_peak_1494	PF3D7_0517100		conserved protein, unknown function
Pf3D7_05_v3	720682	721128	447	720904	173	19.6764	2.17528	18.5034	CSA_5mC_peak_1495	PF3D7_0517200		conserved Plasmodium protein, unknown function
Pf3D7_05_v3	721294	722437	1144	722199	235	53.6114	3.31064	51.7215	CSA_5mC_peak_1496	PF3D7_0517200		conserved Plasmodium protein, unknown function
Pf3D7_05_v3	724679	725106	428	724903	204	32.0181	2.58543	30.6092	CSA_5mC_peak_1497	PF3D7_0517300	SR1	serine/arginine-rich splicing factor 1
Pf3D7_05_v3	725151	725728	578	725411	232	51.0237	3.22267	49.2011	CSA_5mC_peak_1498	PF3D7_0517300	SR1	serine/arginine-rich splicing factor 1
Pf3D7_05_v3	731197	731582	386	731365	149	21.3591	2.4275	20.1524	CSA_5mC_peak_1499	PF3D7_0517400	FACT-L	FACT complex subunit SPT16, putative
Pf3D7_05_v3	732570	733230	661	732917	211	44.8415	3.13518	43.1698	CSA_5mC_peak_1500	PF3D7_0517400	FACT-L	FACT complex subunit SPT16, putative
Pf3D7_05_v3	734322	734981	660	734529	192	36.2962	2.88823	34.8054	CSA_5mC_peak_1501	PF3D7_0517400	FACT-L	FACT complex subunit SPT16, putative
Pf3D7_05_v3	739972	740322	351	740169	195	33.2708	2.71091	31.8379	CSA_5mC_peak_1502	PF3D7_0517600	CPbeta	F-actin-capping protein subunit beta, putative
Pf3D7_05_v3	751154	751400	247	751250	126	13.055	2.05528	12.0188	CSA_5mC_peak_1503	PF3D7_0518000		NOSIP domain-containing protein, putative
Pf3D7_05_v3	753725	754114	390	753918	143	13.8885	2.01106	12.8344	CSA_5mC_peak_1504	PF3D7_0518100	AMR2	protein AMR2
Pf3D7_05_v3	754423	754782	360	754639	173	29.9255	2.7207	28.5557	CSA_5mC_peak_1505	PF3D7_0518100	AMR2	protein AMR2
Pf3D7_05_v3	764278	764598	321	764417	154	10.5997	1.76781	9.62105	CSA_5mC_peak_1506	PF3D7_0518500	DDX23	ATP-dependent RNA helicase DDX23, putative
Pf3D7_05_v3	765616	766806	1191	766001	266	70.0425	3.71231	67.7217	CSA_5mC_peak_1507	PF3D7_0518500	DDX23	ATP-dependent RNA helicase DDX23, putative
Pf3D7_05_v3	769548	770171	624	769863	247	57.4801	3.36506	55.4908	CSA_5mC_peak_1508	PF3D7_0518600	WDR26	WD repeat-containing protein 26, putative
Pf3D7_05_v3	770773	771180	408	770986	229	51.1132	3.25558	49.2878	CSA_5mC_peak_1509	PF3D7_0518600	WDR26	WD repeat-containing protein 26, putative
Pf3D7_05_v3	772915	773197	283	773072	127	12.383	2.00275	11.3626	CSA_5mC_peak_1510	PF3D7_0518600	WDR26	WD repeat-containing protein 26, putative
Pf3D7_05_v3	774346	775655	1310	774879	217	51.3418	3.39179	49.5105	CSA_5mC_peak_1511	PF3D7_0518700	PUF1	mRNA-binding protein PUF1
Pf3D7_05_v3	778387	778628	242	778530	114	9.40724	1.86108	8.45743	CSA_5mC_peak_1512	PF3D7_0518700	PUF1	mRNA-binding protein PUF1
Pf3D7_05_v3	779648	780454	807	780276	247	65.3497	3.71768	63.1549	CSA_5mC_peak_1513	PF3D7_0518700	PUF1	mRNA-binding protein PUF1
Pf3D7_05_v3	781660	781916	257	781765	156	14.7751	1.99767	13.7024	CSA_5mC_peak_1514	intergenic
Pf3D7_05_v3	788593	788888	296	788765	112	8.84925	1.82872	7.91354	CSA_5mC_peak_1515	PF3D7_0519000	SLBP	histone RNA hairpin-binding protein, putative
Pf3D7_05_v3	790375	790691	317	790548	170	30.2691	2.76735	28.8926	CSA_5mC_peak_1516	PF3D7_0519100		50S ribosomal protein L14, mitochondrial, putative
Pf3D7_05_v3	795461	796466	1006	796284	181	22.4886	2.27355	21.2603	CSA_5mC_peak_1517	PF3D7_0519300	COX10	protoheme IX farnesyltransferase
Pf3D7_05_v3	797155	797389	235	797234	118	5.11489	1.51416	4.29026	CSA_5mC_peak_1518	PF3D7_0519300	COX10	protoheme IX farnesyltransferase
Pf3D7_05_v3	798036	798305	270	798167	135	15.6338	2.16979	14.5436	CSA_5mC_peak_1519	PF3D7_0519400	RPS24	40S ribosomal protein S24
Pf3D7_05_v3	798450	798707	258	798597	146	11.8129	1.87043	10.8051	CSA_5mC_peak_1520	PF3D7_0519400	RPS24	40S ribosomal protein S24
Pf3D7_05_v3	800800	801072	273	800954	136	15.2053	2.13525	14.1232	CSA_5mC_peak_1521	intergenic
Pf3D7_05_v3	804724	805749	1026	805357	318	112.54	4.8726	108.936	CSA_5mC_peak_1522	PF3D7_0519500	CCR4-1	CCR4 domain-containing protein 1, putative
Pf3D7_05_v3	807336	808345	1010	807690	403	140.734	4.83921	136.175	CSA_5mC_peak_1523	PF3D7_0519500	CCR4-1	CCR4 domain-containing protein 1, putative
Pf3D7_05_v3	813678	814655	978	814122	262	67.3038	3.6376	65.058	CSA_5mC_peak_1524	PF3D7_0519600		zinc finger protein, putative
Pf3D7_05_v3	817001	817366	366	817183	146	20.1853	2.37895	19.0015	CSA_5mC_peak_1525	PF3D7_0519700		FoP domain-containing protein, putative
Pf3D7_05_v3	820948	821280	333	821074	101	6.05269	1.6507	5.19715	CSA_5mC_peak_1526	PF3D7_0519800		EELM2 domain-containing protein, putative
Pf3D7_05_v3	821632	822986	1355	822766	265	64.9977	3.50944	62.8117	CSA_5mC_peak_1527	PF3D7_0519800		EELM2 domain-containing protein, putative
Pf3D7_05_v3	826543	826886	344	826701	151	12.0198	1.86172	11.0088	CSA_5mC_peak_1528	PF3D7_0519900		conserved protein, unknown function
Pf3D7_05_v3	826951	827311	361	827145	166	21.0305	2.28769	19.8301	CSA_5mC_peak_1529	PF3D7_0519900		conserved protein, unknown function
Pf3D7_05_v3	829493	829862	370	829556	99	5.05857	1.56949	4.23598	CSA_5mC_peak_1530	PF3D7_0520000	RPS9	40S ribosomal protein S9, putative
Pf3D7_05_v3	837007	837391	385	837205	139	14.1155	2.04724	13.0577	CSA_5mC_peak_1531	PF3D7_0520200	MED17	mediator of RNA polymerase II transcription subunit 17, putative
Pf3D7_05_v3	837988	838304	317	838164	154	20.078	2.3135	18.8971	CSA_5mC_peak_1532	PF3D7_0520300	LSM2	U6 snRNA-associated Sm-like protein LSm2, putative
Pf3D7_05_v3	848413	848666	254	848588	130	6.66493	1.59587	5.79107	CSA_5mC_peak_1533	PF3D7_0520700		CDC73 domain-containing protein, putative
Pf3D7_05_v3	850601	851075	475	850824	182	22.0974	2.2485	20.8767	CSA_5mC_peak_1534	PF3D7_0520800		conserved protein, unknown function
Pf3D7_05_v3	852233	852844	612	852644	269	53.7918	3.03109	51.8975	CSA_5mC_peak_1535	PF3D7_0520800		conserved protein, unknown function
Pf3D7_05_v3	857141	858079	939	857397	209	40.532	2.9459	38.954	CSA_5mC_peak_1536	PF3D7_0520900	SAHH	adenosylhomocysteinase
Pf3D7_05_v3	859374	860755	1382	860349	287	64.2277	3.28471	62.0627	CSA_5mC_peak_1537	PF3D7_0521000		conserved Plasmodium protein, unknown function
Pf3D7_05_v3	863486	863717	232	863620	150	13.5573	1.95612	12.5118	CSA_5mC_peak_1538	PF3D7_0521100		conserved Plasmodium protein, unknown function
Pf3D7_05_v3	869941	870203	263	870031	137	14.0233	2.05292	12.967	CSA_5mC_peak_1539	PF3D7_0521200		conserved protein, unknown function
Pf3D7_05_v3	870619	870951	333	870785	194	31.279	2.62106	29.8836	CSA_5mC_peak_1540	PF3D7_0521300		zinc finger protein, putative
Pf3D7_05_v3	871222	871470	249	871379	109	6.77529	1.67816	5.89772	CSA_5mC_peak_1541	PF3D7_0521300		zinc finger protein, putative
Pf3D7_05_v3	871527	871846	320	871705	126	11.1598	1.92398	10.1686	CSA_5mC_peak_1542	PF3D7_0521300		zinc finger protein, putative
Pf3D7_05_v3	873273	873618	346	873362	117	6.37913	1.61645	5.51369	CSA_5mC_peak_1543	PF3D7_0521300		zinc finger protein, putative
Pf3D7_05_v3	878985	879472	488	879109	166	18.3645	2.14398	17.2177	CSA_5mC_peak_1544	PF3D7_0521500		ribosomal large subunit pseudouridylate synthase, putative
Pf3D7_05_v3	882114	882582	469	882247	152	18.1622	2.21463	17.02	CSA_5mC_peak_1545	PF3D7_0521700	DDX1	ATP-dependent RNA helicase DDX1, putative
Pf3D7_05_v3	888877	890323	1447	889118	305	74.6514	3.51806	72.206	CSA_5mC_peak_1546	PF3D7_0521900		conserved Plasmodium protein, unknown function
Pf3D7_05_v3	891429	892692	1264	891604	252	63.276	3.56829	61.1359	CSA_5mC_peak_1547	PF3D7_0521900		conserved Plasmodium protein, unknown function
Pf3D7_05_v3	892733	893037	305	892926	168	18.6863	2.15036	17.5329	CSA_5mC_peak_1548	PF3D7_0521900		conserved Plasmodium protein, unknown function
Pf3D7_05_v3	897919	898281	363	898077	175	24.7285	2.42557	23.457	CSA_5mC_peak_1549	PF3D7_0522100		conserved Plasmodium protein, unknown function
Pf3D7_05_v3	909042	909483	442	909204	220	41.1148	2.8812	39.5248	CSA_5mC_peak_1550	PF3D7_0522400		conserved Plasmodium protein, unknown function
Pf3D7_05_v3	915061	915431	371	915222	205	30.505	2.50954	29.1244	CSA_5mC_peak_1551	PF3D7_0522400		conserved Plasmodium protein, unknown function
Pf3D7_05_v3	915630	915920	291	915799	151	13.4514	1.94526	12.4075	CSA_5mC_peak_1552	PF3D7_0522400		conserved Plasmodium protein, unknown function
Pf3D7_05_v3	916533	916922	390	916668	148	13.0525	1.93569	12.017	CSA_5mC_peak_1553	PF3D7_0522400		conserved Plasmodium protein, unknown function
Pf3D7_05_v3	922365	924265	1901	924079	238	45.0271	2.91156	43.3509	CSA_5mC_peak_1554	PF3D7_0522400		conserved Plasmodium protein, unknown function
Pf3D7_05_v3	924445	924857	413	924646	254	45.5135	2.81846	43.826	CSA_5mC_peak_1555	PF3D7_0522400		conserved Plasmodium protein, unknown function
Pf3D7_05_v3	925430	925875	446	925626	184	25.7307	2.41688	24.4402	CSA_5mC_peak_1556	PF3D7_0522400		conserved Plasmodium protein, unknown function
Pf3D7_05_v3	926525	927102	578	926706	245	48.993	3.02257	47.221	CSA_5mC_peak_1557	PF3D7_0522400		conserved Plasmodium protein, unknown function
Pf3D7_05_v3	930528	932720	2193	931701	238	51.6324	3.19418	49.7938	CSA_5mC_peak_1558	PF3D7_0522400		conserved Plasmodium protein, unknown function
Pf3D7_05_v3	933086	933343	258	933212	172	19.3314	2.16278	18.1656	CSA_5mC_peak_1559	PF3D7_0522400		conserved Plasmodium protein, unknown function
Pf3D7_05_v3	942023	942428	406	942316	135	16.1091	2.20093	15.0081	CSA_5mC_peak_1560	PF3D7_0522700	SufA	iron-sulfur cluster assembly protein SufA
Pf3D7_05_v3	949218	949563	346	949397	147	13.2093	1.94975	12.1715	CSA_5mC_peak_1561	PF3D7_0522900		zinc finger protein, putative
Pf3D7_05_v3	950347	951217	871	950796	251	51.7106	3.08654	49.8699	CSA_5mC_peak_1562	PF3D7_0522900		zinc finger protein, putative
Pf3D7_05_v3	952541	953213	673	952935	247	49.9715	3.04714	48.1751	CSA_5mC_peak_1563	PF3D7_0522900		zinc finger protein, putative
Pf3D7_05_v3	962305	962551	247	962413	154	17.7668	2.17923	16.6325	CSA_5mC_peak_1564	PF3D7_0523000	MDR1	multidrug resistance protein 1
Pf3D7_05_v3	974171	975021	851	974347	200	36.0643	2.80721	34.5776	CSA_5mC_peak_1565	PF3D7_0523400		DnaJ protein, putative
Pf3D7_05_v3	985244	985493	250	985353	117	8.47394	1.7756	7.54849	CSA_5mC_peak_1566	PF3D7_0523700		conserved Plasmodium membrane protein, unknown function
Pf3D7_05_v3	987541	987977	437	987756	293	86.637	4.10607	83.8567	CSA_5mC_peak_1567	PF3D7_0523800		divalent metal transporter, putative
Pf3D7_05_v3	990055	991164	1110	990281	188	35.1068	2.86324	33.6386	CSA_5mC_peak_1568	PF3D7_0523800		divalent metal transporter, putative
Pf3D7_05_v3	998804	999122	319	998974	118	7.68533	1.71212	6.78178	CSA_5mC_peak_1569	PF3D7_0524000	KASbeta	karyopherin beta
Pf3D7_05_v3	1004281	1004881	601	1004650	250	67.0925	3.76266	64.8516	CSA_5mC_peak_1570	PF3D7_0524100		conserved Plasmodium protein, unknown function
Pf3D7_05_v3	1005302	1005681	380	1005495	186	35.6303	2.90947	34.152	CSA_5mC_peak_1571	PF3D7_0524100		conserved Plasmodium protein, unknown function
Pf3D7_05_v3	1006399	1006644	246	1006530	120	7.90754	1.72048	6.99765	CSA_5mC_peak_1572	PF3D7_0524100		conserved Plasmodium protein, unknown function
Pf3D7_05_v3	1010980	1011546	567	1011238	237	58.6242	3.51968	56.6067	CSA_5mC_peak_1573	PF3D7_0524300		conserved Plasmodium protein, unknown function
Pf3D7_05_v3	1018330	1018611	282	1018412	136	8.22737	1.6833	7.30866	CSA_5mC_peak_1574	PF3D7_0524600		50S ribosomal protein L12, apicoplast, putative
Pf3D7_05_v3	1024202	1024623	422	1024397	257	73.5507	3.97472	71.1334	CSA_5mC_peak_1575	PF3D7_0524800	UFD1	ubiquitin fusion degradation protein 1, putative
Pf3D7_05_v3	1028667	1029543	877	1029324	167	22.3247	2.35147	21.0992	CSA_5mC_peak_1576	PF3D7_0524900	TYW1	S-adenosyl-L-methionine-dependent tRNA 4-demethylwyosine synthase, putative
Pf3D7_05_v3	1035227	1035522	296	1035343	143	19.0376	2.3304	17.8771	CSA_5mC_peak_1577	PF3D7_0525000		zinc finger protein, putative
Pf3D7_05_v3	1036545	1036913	369	1036753	179	28.4191	2.58977	27.078	CSA_5mC_peak_1578	PF3D7_0525000		zinc finger protein, putative
Pf3D7_05_v3	1041801	1042436	636	1041977	173	27.3764	2.58133	26.0548	CSA_5mC_peak_1579	PF3D7_0525100	ACS10	acyl-CoA synthetase
Pf3D7_05_v3	1045438	1046490	1053	1045591	197	43.3392	3.2043	41.7006	CSA_5mC_peak_1580	PF3D7_0525200	SMC6	structural maintenance of chromosomes protein 6, putative
Pf3D7_05_v3	1048684	1049280	597	1048903	279	80.3894	4.00853	77.7816	CSA_5mC_peak_1581	PF3D7_0525200	SMC6	structural maintenance of chromosomes protein 6, putative
Pf3D7_05_v3	1049970	1050471	502	1050236	196	30.3719	2.56298	28.9936	CSA_5mC_peak_1582	PF3D7_0525200	SMC6	structural maintenance of chromosomes protein 6, putative
Pf3D7_05_v3	1052755	1053016	262	1052876	136	11.6338	1.90482	10.6306	CSA_5mC_peak_1583	PF3D7_0525300		conserved protein, unknown function
Pf3D7_05_v3	1054152	1054442	291	1054312	156	24.1971	2.54078	22.9358	CSA_5mC_peak_1584	intergenic
Pf3D7_05_v3	1054988	1055391	404	1055278	134	15.757	2.18475	14.6632	CSA_5mC_peak_1585	intergenic
Pf3D7_05_v3	1057774	1058004	231	1057917	118	8.90118	1.80278	7.96425	CSA_5mC_peak_1586	PF3D7_0525400		7-helix-1 protein
Pf3D7_05_v3	1062678	1062911	234	1062771	122	7.5307	1.68495	6.63116	CSA_5mC_peak_1587	PF3D7_0525500		WD repeat-containing protein, putative
Pf3D7_05_v3	1063079	1063446	368	1063228	158	19.9003	2.27627	18.7228	CSA_5mC_peak_1588	PF3D7_0525500		WD repeat-containing protein, putative
Pf3D7_05_v3	1063499	1063972	474	1063709	163	18.0617	2.14394	16.9212	CSA_5mC_peak_1589	PF3D7_0525500		WD repeat-containing protein, putative
Pf3D7_05_v3	1064481	1064750	270	1064632	153	20.9584	2.3725	19.7601	CSA_5mC_peak_1590	PF3D7_0525500		WD repeat-containing protein, putative
Pf3D7_05_v3	1071430	1071904	475	1071744	161	18.4674	2.17749	17.3189	CSA_5mC_peak_1591	PF3D7_0525800	IMC1g	inner membrane complex protein 1g, putative
Pf3D7_05_v3	1075185	1075497	313	1075318	150	16.1577	2.1089	15.0558	CSA_5mC_peak_1592	PF3D7_0525900	NEK2	NIMA related kinase 2
Pf3D7_05_v3	1077790	1078120	331	1077926	197	39.3749	2.99882	37.821	CSA_5mC_peak_1593	PF3D7_0526000		RAP protein, putative
Pf3D7_05_v3	1079943	1080235	293	1080117	126	6.38339	1.58771	5.51774	CSA_5mC_peak_1594	PF3D7_0526100		conserved Plasmodium membrane protein, unknown function
Pf3D7_05_v3	1090937	1091419	483	1091172	245	49.6243	3.04876	47.837	CSA_5mC_peak_1595	PF3D7_0526500		conserved Plasmodium protein, unknown function
Pf3D7_05_v3	1092536	1093691	1156	1092720	204	44.8583	3.20753	43.1863	CSA_5mC_peak_1596	PF3D7_0526500		conserved Plasmodium protein, unknown function
Pf3D7_05_v3	1102062	1102583	522	1102289	232	48.3381	3.10268	46.5825	CSA_5mC_peak_1597	PF3D7_0526600		conserved Plasmodium protein, unknown function
Pf3D7_05_v3	1102729	1103798	1070	1102923	200	35.5055	2.78007	34.0295	CSA_5mC_peak_1598	PF3D7_0526600		conserved Plasmodium protein, unknown function
Pf3D7_05_v3	1104145	1104530	386	1104321	160	25.8793	2.60552	24.5856	CSA_5mC_peak_1599	PF3D7_0526600		conserved Plasmodium protein, unknown function
Pf3D7_05_v3	1104768	1105258	491	1105022	196	34.6283	2.76973	33.1693	CSA_5mC_peak_1600	PF3D7_0526600		conserved Plasmodium protein, unknown function
Pf3D7_05_v3	1105429	1106268	840	1105900	242	56.2751	3.36098	54.3167	CSA_5mC_peak_1601	PF3D7_0526600		conserved Plasmodium protein, unknown function
Pf3D7_05_v3	1106979	1108013	1035	1107206	155	23.7834	2.5246	22.53	CSA_5mC_peak_1602	PF3D7_0526600		conserved Plasmodium protein, unknown function
Pf3D7_05_v3	1109242	1109943	702	1109609	206	31.8744	2.56542	30.4681	CSA_5mC_peak_1603	PF3D7_0526600		conserved Plasmodium protein, unknown function
Pf3D7_05_v3	1112086	1112491	406	1112165	128	6.66455	1.6019	5.79077	CSA_5mC_peak_1604	PF3D7_0526600		conserved Plasmodium protein, unknown function
Pf3D7_05_v3	1112972	1113233	262	1113087	156	14.4634	1.98006	13.3976	CSA_5mC_peak_1605	PF3D7_0526600		conserved Plasmodium protein, unknown function
Pf3D7_05_v3	1113352	1114609	1258	1114197	224	41.4073	2.8629	39.8109	CSA_5mC_peak_1606	PF3D7_0526600		conserved Plasmodium protein, unknown function
Pf3D7_05_v3	1114713	1115071	359	1114896	132	15.0621	2.15238	13.9835	CSA_5mC_peak_1607	PF3D7_0526600		conserved Plasmodium protein, unknown function
Pf3D7_05_v3	1118537	1119306	770	1118901	196	34.8052	2.77847	33.343	CSA_5mC_peak_1608	PF3D7_0526700		conserved protein, unknown function
Pf3D7_05_v3	1120839	1121066	228	1120943	110	5.26758	1.55025	4.43755	CSA_5mC_peak_1609	PF3D7_0526800		conserved Plasmodium protein, unknown function
Pf3D7_05_v3	1121416	1121830	415	1121637	194	38.5565	2.98575	37.0196	CSA_5mC_peak_1610	PF3D7_0526800		conserved Plasmodium protein, unknown function
Pf3D7_05_v3	1122922	1123338	417	1123111	297	90.1172	4.20296	87.2369	CSA_5mC_peak_1611	PF3D7_0526900		transmembrane emp24 domain-containing protein, putative
Pf3D7_05_v3	1125416	1125881	466	1125676	262	71.5346	3.82238	69.1734	CSA_5mC_peak_1612	PF3D7_0527000	MCM3	DNA replication licensing factor MCM3, putative
Pf3D7_05_v3	1126489	1127226	738	1127098	149	15.3576	2.06724	14.2733	CSA_5mC_peak_1613	PF3D7_0527000	MCM3	DNA replication licensing factor MCM3, putative
Pf3D7_05_v3	1133743	1134112	370	1133969	219	40.244	2.84998	38.6726	CSA_5mC_peak_1614	PF3D7_0527200	USP14	ubiquitin carboxyl-terminal hydrolase 14
Pf3D7_05_v3	1136245	1136583	339	1136439	150	16.7221	2.14219	15.609	CSA_5mC_peak_1615	PF3D7_0527300	METAP1a	methionine aminopeptidase 1a, putative
Pf3D7_05_v3	1136898	1137254	357	1137064	169	27.3519	2.61258	26.0309	CSA_5mC_peak_1616	PF3D7_0527300	METAP1a	methionine aminopeptidase 1a, putative
Pf3D7_05_v3	1144015	1145041	1027	1144729	257	66.0979	3.63881	63.8834	CSA_5mC_peak_1617	PF3D7_0527500	HIP	Hsc70-interacting protein
Pf3D7_05_v3	1153676	1154176	501	1153891	241	59.5151	3.51717	57.4748	CSA_5mC_peak_1618	PF3D7_0527900	DDX41	ATP-dependent RNA helicase DDX41, putative
Pf3D7_05_v3	1154402	1154932	531	1154739	153	12.6488	1.88991	11.6241	CSA_5mC_peak_1619	PF3D7_0527900	DDX41	ATP-dependent RNA helicase DDX41, putative
Pf3D7_05_v3	1164500	1164887	388	1164716	194	32.3053	2.67125	30.8909	CSA_5mC_peak_1620	PF3D7_0528200	EIF3E	eukaryotic translation initiation factor 3 subunit E, putative
Pf3D7_05_v3	1167648	1167927	280	1167775	158	17.7981	2.15744	16.6632	CSA_5mC_peak_1621	PF3D7_0528300		conserved protein, unknown function
Pf3D7_05_v3	1171647	1172061	415	1171870	185	37.3207	3.0101	35.8087	CSA_5mC_peak_1622	PF3D7_0528400	DHHC7	palmitoyltransferase DHHC7
Pf3D7_05_v3	1176978	1177448	471	1177263	117	10.2716	1.90963	9.30089	CSA_5mC_peak_1623	PF3D7_0528500	CPalpha	F-actin-capping protein subunit alpha, putative
Pf3D7_05_v3	1177991	1178249	259	1178096	116	9.97988	1.89345	9.01603	CSA_5mC_peak_1624	PF3D7_0528700	CYP23	peptidyl-prolyl cis-trans isomerase
Pf3D7_05_v3	1181519	1181859	341	1181661	175	19.2724	2.14407	18.1077	CSA_5mC_peak_1625	PF3D7_0528800		nuclear GTP-binding protein, putative
Pf3D7_05_v3	1196452	1196726	275	1196604	109	5.3098	1.55702	4.47875	CSA_5mC_peak_1626	PF3D7_0529300	TIC22	apicoplast TIC22 protein
Pf3D7_05_v3	1197531	1197775	245	1197632	156	18.5903	2.21431	17.4394	CSA_5mC_peak_1627	PF3D7_0529300	TIC22	apicoplast TIC22 protein
Pf3D7_05_v3	1198944	1199723	780	1199424	140	13.5302	2.00486	12.4855	CSA_5mC_peak_1628	PF3D7_0529400		conserved Plasmodium protein, unknown function
Pf3D7_05_v3	1200686	1201747	1062	1201445	147	18.5144	2.26893	17.3649	CSA_5mC_peak_1629	PF3D7_0529400		conserved Plasmodium protein, unknown function
Pf3D7_05_v3	1203050	1203368	319	1203239	163	21.5558	2.33607	20.3456	CSA_5mC_peak_1630	PF3D7_0529400		conserved Plasmodium protein, unknown function
Pf3D7_05_v3	1205343	1205632	290	1205502	129	14.0438	2.10383	12.9867	CSA_5mC_peak_1631	PF3D7_0529400		conserved Plasmodium protein, unknown function
Pf3D7_05_v3	1211597	1211924	328	1211752	187	27.8732	2.50345	26.5423	CSA_5mC_peak_1632	PF3D7_0529700		heptatricopeptide repeat-containing protein, putative
Pf3D7_05_v3	1213441	1214910	1470	1213586	237	63.9423	3.77218	61.7839	CSA_5mC_peak_1633	PF3D7_0529800		conserved Plasmodium protein, unknown function
Pf3D7_05_v3	1215354	1216083	730	1215618	276	71.4155	3.66457	69.0571	CSA_5mC_peak_1634	PF3D7_0529800		conserved Plasmodium protein, unknown function
Pf3D7_05_v3	1216338	1217072	735	1216793	172	21.2292	2.2616	20.0252	CSA_5mC_peak_1635	PF3D7_0529800		conserved Plasmodium protein, unknown function
Pf3D7_05_v3	1217182	1218465	1284	1217917	195	42.3138	3.17193	40.6979	CSA_5mC_peak_1636	PF3D7_0529800		conserved Plasmodium protein, unknown function
Pf3D7_05_v3	1224398	1224887	490	1224751	169	20.1506	2.22238	18.9681	CSA_5mC_peak_1637	PF3D7_0530000		conserved Plasmodium protein, unknown function
Pf3D7_05_v3	1226843	1227171	329	1227008	144	12.0819	1.89556	11.0686	CSA_5mC_peak_1638	PF3D7_0530100	SYN6	SNARE protein, putative
Pf3D7_05_v3	1230185	1230541	357	1230375	114	4.36831	1.46326	3.56995	CSA_5mC_peak_1639	PF3D7_0530200	PPT	phosphoenolpyruvate/phosphate translocator
Pf3D7_05_v3	1232702	1233626	925	1232877	146	20.1853	2.37895	19.0015	CSA_5mC_peak_1640	PF3D7_0530300	PIC6	PhIL1-interacting candidate PIC6
Pf3D7_05_v3	1233943	1234683	741	1234466	164	20.2985	2.26029	19.1127	CSA_5mC_peak_1641	PF3D7_0530300	PIC6	PhIL1-interacting candidate PIC6
Pf3D7_05_v3	1234761	1235674	914	1235214	164	23.0413	2.4117	21.8021	CSA_5mC_peak_1642	PF3D7_0530300	PIC6	PhIL1-interacting candidate PIC6
Pf3D7_05_v3	1236126	1237097	972	1236845	220	44.9673	3.05669	43.292	CSA_5mC_peak_1643	PF3D7_0530300	PIC6	PhIL1-interacting candidate PIC6
Pf3D7_05_v3	1242765	1243079	315	1242950	156	21.2296	2.36643	20.0257	CSA_5mC_peak_1644	PF3D7_0530400		conserved Plasmodium protein, unknown function
Pf3D7_05_v3	1249035	1249947	913	1249683	213	46.7421	3.208	45.0259	CSA_5mC_peak_1645	PF3D7_0530600		XAP-5 DNA binding protein, putative
Pf3D7_05_v3	1252079	1252925	847	1252287	192	37.3863	2.94442	35.873	CSA_5mC_peak_1646	PF3D7_0530700		conserved Plasmodium protein, unknown function
Pf3D7_05_v3	1253697	1253986	290	1253902	114	8.28428	1.77516	7.36417	CSA_5mC_peak_1647	PF3D7_0530700		conserved Plasmodium protein, unknown function
Pf3D7_05_v3	1258866	1259454	589	1259192	169	21.8416	2.3124	20.6255	CSA_5mC_peak_1648	PF3D7_0530900	FRM1	formin 1
Pf3D7_05_v3	1259713	1260257	545	1260006	223	46.8092	3.11445	45.0911	CSA_5mC_peak_1649	PF3D7_0530900	FRM1	formin 1
Pf3D7_05_v3	1260393	1260645	253	1260545	139	12.5198	1.94653	11.4964	CSA_5mC_peak_1650	PF3D7_0530900	FRM1	formin 1
Pf3D7_05_v3	1262246	1263461	1216	1262899	302	91.8237	4.21284	88.8947	CSA_5mC_peak_1651	PF3D7_0530900	FRM1	formin 1
Pf3D7_05_v3	1267609	1267920	312	1267751	136	13.3679	2.01653	12.3255	CSA_5mC_peak_1652	PF3D7_0531000		SURF1 domain-containing protein, putative
Pf3D7_05_v3	1268370	1268857	488	1268540	143	11.7954	1.88249	10.788	CSA_5mC_peak_1653	PF3D7_0531000		SURF1 domain-containing protein, putative
Pf3D7_05_v3	1270627	1271158	532	1270758	153	16.1148	2.0896	15.0136	CSA_5mC_peak_1654	PF3D7_0531100		conserved Plasmodium protein, unknown function
Pf3D7_05_v3	1273322	1273757	436	1273600	139	10.5998	1.82519	9.62113	CSA_5mC_peak_1655	PF3D7_0531100		conserved Plasmodium protein, unknown function
Pf3D7_05_v3	1273893	1274270	378	1274070	162	17.5359	2.12064	16.4066	CSA_5mC_peak_1656	PF3D7_0531100		conserved Plasmodium protein, unknown function
Pf3D7_05_v3	1275313	1275942	630	1275616	156	21.8139	2.40045	20.5982	CSA_5mC_peak_1657	PF3D7_0531100		conserved Plasmodium protein, unknown function
Pf3D7_05_v3	1276033	1276494	462	1276303	183	34.6893	2.88786	33.2291	CSA_5mC_peak_1658	PF3D7_0531100		conserved Plasmodium protein, unknown function
Pf3D7_05_v3	1276923	1277683	761	1277435	148	13.5595	1.96582	12.5135	CSA_5mC_peak_1659	PF3D7_0531100		conserved Plasmodium protein, unknown function
Pf3D7_05_v3	1281662	1282216	555	1281978	272	55.2632	3.06477	53.3304	CSA_5mC_peak_1660	PF3D7_0531300		conserved Plasmodium protein, unknown function
Pf3D7_05_v3	1284496	1284737	242	1284622	138	10.1497	1.80067	9.18187	CSA_5mC_peak_1661	PF3D7_0531400		G-patch domain-containing protein, putative
Pf3D7_05_v3	1301173	1301603	431	1301399	234	49.3405	3.12931	47.5594	CSA_5mC_peak_1662	PF3D7_0532100	ETRAMP5	early transcribed membrane protein 5
Pf3D7_05_v3	1309725	1309973	249	1309820	129	8.10129	1.69947	7.18574	CSA_5mC_peak_1663	PF3D7_0532300		Plasmodium exported protein (PHISTb), unknown function
Pf3D7_06_v3	452	1161	710	694	207	48.5949	3.36613	46.8327	CSA_5mC_peak_1664	intergenic
Pf3D7_06_v3	3427	3769	343	3587	106	5.576	1.58987	4.73628	CSA_5mC_peak_1665	PF3D7_0600200	VAR	erythrocyte membrane protein 1, PfEMP1
Pf3D7_06_v3	4744	4995	252	4887	154	14.5023	1.99178	13.435	CSA_5mC_peak_1666	PF3D7_0600200	VAR	erythrocyte membrane protein 1, PfEMP1
Pf3D7_06_v3	5606	5856	251	5719	107	3.94883	1.44401	3.16628	CSA_5mC_peak_1667	PF3D7_0600200	VAR	erythrocyte membrane protein 1, PfEMP1
Pf3D7_06_v3	6054	6712	659	6378	135	12.0583	1.93723	11.0467	CSA_5mC_peak_1668	PF3D7_0600200	VAR	erythrocyte membrane protein 1, PfEMP1
Pf3D7_06_v3	7136	7540	405	7307	131	9.39717	1.78007	8.44818	CSA_5mC_peak_1669	PF3D7_0600200	VAR	erythrocyte membrane protein 1, PfEMP1
Pf3D7_06_v3	7659	8517	859	7938	176	21.3944	2.24687	20.1868	CSA_5mC_peak_1670	PF3D7_0600200	VAR	erythrocyte membrane protein 1, PfEMP1
Pf3D7_06_v3	8759	9372	614	8969	130	7.01267	1.62032	6.12888	CSA_5mC_peak_1671	PF3D7_0600200	VAR	erythrocyte membrane protein 1, PfEMP1
Pf3D7_06_v3	10659	11530	872	11133	144	18.9897	2.31986	17.8307	CSA_5mC_peak_1672	PF3D7_0600200	VAR	erythrocyte membrane protein 1, PfEMP1
Pf3D7_06_v3	12038	12549	512	12299	142	15.4757	2.11477	14.3878	CSA_5mC_peak_1673	PF3D7_0600200	VAR	erythrocyte membrane protein 1, PfEMP1
Pf3D7_06_v3	12859	13342	484	12974	119	10.8658	1.942	9.88094	CSA_5mC_peak_1674	intergenic
Pf3D7_06_v3	15579	15851	273	15723	145	16.6078	2.16594	15.4972	CSA_5mC_peak_1675	PF3D7_0600300	RIF	rifin
Pf3D7_06_v3	21660	22229	570	22070	180	33.2249	2.83723	31.793	CSA_5mC_peak_1676	PF3D7_0600400	VAR	erythrocyte membrane protein 1, PfEMP1
Pf3D7_06_v3	26931	27281	351	27095	144	19.4172	2.34658	18.2492	CSA_5mC_peak_1677	PF3D7_0600500	RIF	rifin
Pf3D7_06_v3	30837	31367	531	31044	191	40.2896	3.1072	38.7164	CSA_5mC_peak_1678	PF3D7_0600600	VAR	erythrocyte membrane protein 1 (PfEMP1), exon 2
Pf3D7_06_v3	32057	32859	803	32250	135	9.86098	1.7943	8.9001	CSA_5mC_peak_1679	PF3D7_0600700	RIF	rifin
Pf3D7_06_v3	35817	36215	399	36019	200	41.4995	3.07762	39.9011	CSA_5mC_peak_1680	intergenic
Pf3D7_06_v3	39122	39459	338	39306	181	34.1732	2.87915	32.7231	CSA_5mC_peak_1681	intergenic
Pf3D7_06_v3	51636	51899	264	51805	99	5.5958	1.61833	4.75462	CSA_5mC_peak_1682	intergenic
Pf3D7_06_v3	60157	61116	960	60831	158	25.0328	2.57315	23.7553	CSA_5mC_peak_1683	intergenic
Pf3D7_06_v3	62269	62730	462	62439	114	9.40724	1.86108	8.45743	CSA_5mC_peak_1684	intergenic
Pf3D7_06_v3	83473	85244	1772	84876	298	84.0788	3.94483	81.368	CSA_5mC_peak_1685	PF3D7_0602000		zinc finger protein, putative
Pf3D7_06_v3	88623	88892	270	88812	101	6.05269	1.6507	5.19715	CSA_5mC_peak_1686	PF3D7_0602000		zinc finger protein, putative
Pf3D7_06_v3	92499	93041	543	92732	286	87.1456	4.214	84.3503	CSA_5mC_peak_1687	PF3D7_0602100	MTR4	ATP-dependent RNA helicase MTR4
Pf3D7_06_v3	94325	94689	365	94468	161	18.8405	2.19815	17.6843	CSA_5mC_peak_1688	PF3D7_0602100	MTR4	ATP-dependent RNA helicase MTR4
Pf3D7_06_v3	97939	98169	231	98095	130	6.85954	1.60958	5.97973	CSA_5mC_peak_1689	PF3D7_0602200		MYND-type zinc finger protein, putative
Pf3D7_06_v3	102170	102623	454	102379	214	36.3252	2.71154	34.8336	CSA_5mC_peak_1690	PF3D7_0602400	EF-G	elongation factor G
Pf3D7_06_v3	103737	104306	570	103945	200	32.752	2.64797	31.3292	CSA_5mC_peak_1691	PF3D7_0602400	EF-G	elongation factor G
Pf3D7_06_v3	108550	108978	429	108765	183	27.5207	2.51373	26.1968	CSA_5mC_peak_1692	PF3D7_0602600		SAC3 domain-containing protein, putative
Pf3D7_06_v3	118670	118960	291	118802	130	10.8858	1.88478	9.90026	CSA_5mC_peak_1693	PF3D7_0602900		conserved Plasmodium protein, unknown function
Pf3D7_06_v3	119864	120424	561	120043	173	24.2468	2.41391	22.9847	CSA_5mC_peak_1694	PF3D7_0602900		conserved Plasmodium protein, unknown function
Pf3D7_06_v3	123831	124387	557	123997	140	14.6545	2.07541	13.5848	CSA_5mC_peak_1695	PF3D7_0603000		SDE2 domain-containing protein, putative
Pf3D7_06_v3	130664	131066	403	130904	173	24.5512	2.43003	23.2836	CSA_5mC_peak_1696	PF3D7_0603300	DHODH	dihydroorotate dehydrogenase
Pf3D7_06_v3	133583	134503	921	133990	236	36.0953	2.56017	34.6081	CSA_5mC_peak_1697	PF3D7_0603400	TEX1	trophozoite exported protein 1
Pf3D7_06_v3	134845	136310	1466	135943	271	69.1486	3.62201	66.8536	CSA_5mC_peak_1698	PF3D7_0603400	TEX1	trophozoite exported protein 1
Pf3D7_06_v3	142101	142548	448	142294	160	15.7097	2.0305	14.6177	CSA_5mC_peak_1699	PF3D7_0603600		AT-rich interactive domain-containing protein, putative
Pf3D7_06_v3	143106	143611	506	143523	124	6.72971	1.61931	5.85406	CSA_5mC_peak_1700	PF3D7_0603600		AT-rich interactive domain-containing protein, putative
Pf3D7_06_v3	145230	146980	1751	146423	254	52.1447	3.08024	50.2927	CSA_5mC_peak_1701	PF3D7_0603600		AT-rich interactive domain-containing protein, putative
Pf3D7_06_v3	148394	148772	379	148567	200	36.062	2.8071	34.5755	CSA_5mC_peak_1702	PF3D7_0603600		AT-rich interactive domain-containing protein, putative
Pf3D7_06_v3	154042	155365	1324	154587	231	45.9427	3.00587	44.2447	CSA_5mC_peak_1703	PF3D7_0603800	CEP76	NdP2 protein, putative
Pf3D7_06_v3	155838	156389	552	156055	220	41.8819	2.91574	40.2753	CSA_5mC_peak_1704	PF3D7_0603800	CEP76	NdP2 protein, putative
Pf3D7_06_v3	158004	158240	237	158156	120	9.16851	1.81292	8.22479	CSA_5mC_peak_1705	PF3D7_0603800	CEP76	NdP2 protein, putative
Pf3D7_06_v3	159899	160441	543	160286	192	24.1526	2.2926	22.8927	CSA_5mC_peak_1706	PF3D7_0603800	CEP76	NdP2 protein, putative
Pf3D7_06_v3	161529	162310	782	162018	262	52.8921	3.04818	51.0222	CSA_5mC_peak_1707	PF3D7_0603900		conserved Plasmodium protein, unknown function
Pf3D7_06_v3	168372	168972	601	168659	258	61.5647	3.43368	59.4708	CSA_5mC_peak_1708	PF3D7_0604000		conserved Plasmodium protein, unknown function
Pf3D7_06_v3	174304	174911	608	174638	307	79.7993	3.6893	77.2097	CSA_5mC_peak_1709	PF3D7_0604100	SIP2	AP2 domain transcription factor
Pf3D7_06_v3	175511	175749	239	175573	107	3.07374	1.36208	2.32726	CSA_5mC_peak_1710	PF3D7_0604100	SIP2	AP2 domain transcription factor
Pf3D7_06_v3	176251	177204	954	176989	215	41.3073	2.93086	39.7127	CSA_5mC_peak_1711	PF3D7_0604100	SIP2	AP2 domain transcription factor
Pf3D7_06_v3	177700	178536	837	177880	148	20.0947	2.358	18.9134	CSA_5mC_peak_1712	PF3D7_0604100	SIP2	AP2 domain transcription factor
Pf3D7_06_v3	183081	183341	261	183196	131	8.26215	1.7032	7.34271	CSA_5mC_peak_1713	PF3D7_0604300		conserved Plasmodium protein, unknown function
Pf3D7_06_v3	191304	192564	1261	191724	268	59.9455	3.27702	57.894	CSA_5mC_peak_1714	PF3D7_0604500		GYF domain-containing protein, putative
Pf3D7_06_v3	195323	197309	1987	196394	362	127.411	4.86384	123.292	CSA_5mC_peak_1715	PF3D7_0604500		GYF domain-containing protein, putative
Pf3D7_06_v3	198933	199335	403	199111	170	18.6488	2.13778	17.4967	CSA_5mC_peak_1716	PF3D7_0604600		DNA helicase, putative
Pf3D7_06_v3	199767	200079	313	199902	185	25.4196	2.39504	24.1354	CSA_5mC_peak_1717	PF3D7_0604600		DNA helicase, putative
Pf3D7_06_v3	203130	203467	338	203351	139	8.06869	1.66303	7.15399	CSA_5mC_peak_1718	PF3D7_0604600		DNA helicase, putative
Pf3D7_06_v3	205657	206068	412	205943	146	9.76389	1.74618	8.80531	CSA_5mC_peak_1719	PF3D7_0604700	GILP	glyoxalase I-like protein GILP
Pf3D7_06_v3	210064	210438	375	210276	226	38.9592	2.74202	37.4139	CSA_5mC_peak_1720	PF3D7_0604800		RAP protein, putative
Pf3D7_06_v3	210760	211101	342	210954	160	17.7589	2.14391	16.6246	CSA_5mC_peak_1721	PF3D7_0604800		RAP protein, putative
Pf3D7_06_v3	211421	211703	283	211584	174	27.989	2.60643	26.6562	CSA_5mC_peak_1722	PF3D7_0604800		RAP protein, putative
Pf3D7_06_v3	213562	214048	487	213761	188	25.5676	2.38364	24.2801	CSA_5mC_peak_1723	PF3D7_0605000		50S ribosomal protein L24, putative
Pf3D7_06_v3	217180	217718	539	217369	204	46.5103	3.2924	44.7989	CSA_5mC_peak_1724	PF3D7_0605100	KH1	KH domain-containing protein, putative
Pf3D7_06_v3	219037	219266	230	219129	129	10.464	1.8611	9.48866	CSA_5mC_peak_1725	PF3D7_0605100	KH1	KH domain-containing protein, putative
Pf3D7_06_v3	226235	226575	341	226419	177	21.7558	2.25957	20.5415	CSA_5mC_peak_1726	PF3D7_0605500		cyclin dependent kinase binding protein, putative
Pf3D7_06_v3	227265	227495	231	227430	106	4.00704	1.45186	3.2223	CSA_5mC_peak_1727	PF3D7_0605500		cyclin dependent kinase binding protein, putative
Pf3D7_06_v3	228246	230230	1985	228918	293	78.9404	3.79349	76.3788	CSA_5mC_peak_1728	PF3D7_0605600		nucleoside diphosphate kinase, putative
Pf3D7_06_v3	230445	230995	551	230785	184	29.151	2.58941	27.796	CSA_5mC_peak_1729	PF3D7_0605600		nucleoside diphosphate kinase, putative
Pf3D7_06_v3	231101	232859	1759	231448	268	67.8071	3.59666	65.5477	CSA_5mC_peak_1730	PF3D7_0605600		nucleoside diphosphate kinase, putative
Pf3D7_06_v3	238545	238876	332	238738	142	10.5803	1.81161	9.60219	CSA_5mC_peak_1731	PF3D7_0605800	RAD50	DNA repair protein RAD50, putative
Pf3D7_06_v3	239025	239569	545	239340	202	30.116	2.51088	28.7428	CSA_5mC_peak_1732	PF3D7_0605800	RAD50	DNA repair protein RAD50, putative
Pf3D7_06_v3	240153	240432	280	240285	144	17.5435	2.23002	16.414	CSA_5mC_peak_1733	PF3D7_0605800	RAD50	DNA repair protein RAD50, putative
Pf3D7_06_v3	240818	241534	717	241354	175	26.7304	2.5312	25.4215	CSA_5mC_peak_1734	PF3D7_0605800	RAD50	DNA repair protein RAD50, putative
Pf3D7_06_v3	241743	242231	489	241955	231	52.6457	3.30627	50.7809	CSA_5mC_peak_1735	PF3D7_0605800	RAD50	DNA repair protein RAD50, putative
Pf3D7_06_v3	243647	243976	330	243831	190	27.6997	2.47466	26.3719	CSA_5mC_peak_1736	PF3D7_0605800	RAD50	DNA repair protein RAD50, putative
Pf3D7_06_v3	251017	251954	938	251502	212	39.7765	2.88479	38.2149	CSA_5mC_peak_1737	PF3D7_0606000	KIC1	protein KIC1
Pf3D7_06_v3	253260	253588	329	253407	157	16.7491	2.10396	15.6355	CSA_5mC_peak_1738	PF3D7_0606000	KIC1	protein KIC1
Pf3D7_06_v3	259152	260040	889	259365	329	85.7635	3.70466	83.0065	CSA_5mC_peak_1739	PF3D7_0606100		RNA-binding protein, putative
Pf3D7_06_v3	272381	273160	780	272876	258	66.6673	3.65291	64.438	CSA_5mC_peak_1740	PF3D7_0606600		conserved Plasmodium protein, unknown function
Pf3D7_06_v3	273486	274499	1014	274205	304	95.884	4.3565	92.8335	CSA_5mC_peak_1741	PF3D7_0606600		conserved Plasmodium protein, unknown function
Pf3D7_06_v3	274658	274967	310	274786	126	8.04925	1.70705	7.13504	CSA_5mC_peak_1742	PF3D7_0606600		conserved Plasmodium protein, unknown function
Pf3D7_06_v3	275109	275451	343	275255	120	10.0622	1.87794	9.09642	CSA_5mC_peak_1743	PF3D7_0606600		conserved Plasmodium protein, unknown function
Pf3D7_06_v3	275628	276003	376	275821	181	30.4217	2.67889	29.0425	CSA_5mC_peak_1744	PF3D7_0606600		conserved Plasmodium protein, unknown function
Pf3D7_06_v3	276534	277109	576	276931	231	51.5151	3.25452	49.6797	CSA_5mC_peak_1745	PF3D7_0606600		conserved Plasmodium protein, unknown function
Pf3D7_06_v3	277443	277676	234	277545	134	11.7618	1.92299	10.7566	CSA_5mC_peak_1746	PF3D7_0606600		conserved Plasmodium protein, unknown function
Pf3D7_06_v3	281992	282526	535	282247	155	22.8286	2.46784	21.5937	CSA_5mC_peak_1747	PF3D7_0606700		coatomer alpha subunit, putative
Pf3D7_06_v3	285031	285657	627	285187	168	20.0293	2.22173	18.8492	CSA_5mC_peak_1748	PF3D7_0606700		coatomer alpha subunit, putative
Pf3D7_06_v3	288892	289199	308	289016	125	11.4574	1.95013	10.4596	CSA_5mC_peak_1749	PF3D7_0606800	VFT1	VFT protein
Pf3D7_06_v3	293008	293333	326	293164	204	33.5317	2.65566	32.0935	CSA_5mC_peak_1750	PF3D7_0607000		translation initiation factor IF-2, putative
Pf3D7_06_v3	293740	295156	1417	294179	318	99.4546	4.32845	96.3014	CSA_5mC_peak_1751	PF3D7_0607000		translation initiation factor IF-2, putative
Pf3D7_06_v3	295893	296721	829	296290	197	26.8771	2.39172	25.5651	CSA_5mC_peak_1752	PF3D7_0607000		translation initiation factor IF-2, putative
Pf3D7_06_v3	302176	302536	361	302371	242	56.0032	3.34893	54.0512	CSA_5mC_peak_1753	PF3D7_0607200		RING zinc finger protein, putative
Pf3D7_06_v3	304307	304605	299	304430	119	10.8658	1.942	9.88094	CSA_5mC_peak_1754	PF3D7_0607300	UROD	uroporphyrinogen III decarboxylase
Pf3D7_06_v3	306989	307232	244	307088	121	10.9488	1.93658	9.9616	CSA_5mC_peak_1755	PF3D7_0607400		G-protein associated signal transduction protein, putative
Pf3D7_06_v3	314622	315160	539	314762	164	22.362	2.37395	21.136	CSA_5mC_peak_1756	PF3D7_0607600	SAS6	spindle assembly abnormal protein 6, putative
Pf3D7_06_v3	315653	316080	428	315894	156	16.333	2.08583	15.228	CSA_5mC_peak_1757	PF3D7_0607600	SAS6	spindle assembly abnormal protein 6, putative
Pf3D7_06_v3	320765	321086	322	320961	116	5.77665	1.57263	4.93031	CSA_5mC_peak_1758	PF3D7_0607700		conserved Plasmodium protein, unknown function
Pf3D7_06_v3	321549	321888	340	321685	140	8.0882	1.66111	7.17297	CSA_5mC_peak_1759	PF3D7_0607700		conserved Plasmodium protein, unknown function
Pf3D7_06_v3	323679	324352	674	323856	143	16.2654	2.15752	15.1619	CSA_5mC_peak_1760	PF3D7_0607700		conserved Plasmodium protein, unknown function
Pf3D7_06_v3	325050	325461	412	325279	150	15.8404	2.09021	14.745	CSA_5mC_peak_1761	PF3D7_0607700		conserved Plasmodium protein, unknown function
Pf3D7_06_v3	330081	330534	454	330372	154	18.2623	2.20787	17.1182	CSA_5mC_peak_1762	PF3D7_0607800		GTP-binding protein, putative
Pf3D7_06_v3	330979	331666	688	331432	215	45.7331	3.13929	44.0405	CSA_5mC_peak_1763	PF3D7_0607800		GTP-binding protein, putative
Pf3D7_06_v3	332394	333362	969	332627	290	85.7367	4.10424	82.98	CSA_5mC_peak_1764	PF3D7_0607900		conserved Plasmodium protein, unknown function
Pf3D7_06_v3	333505	333746	242	333627	135	10.0528	1.80683	9.08729	CSA_5mC_peak_1765	PF3D7_0607900		conserved Plasmodium protein, unknown function
Pf3D7_06_v3	334647	334951	305	334820	165	23.6336	2.43737	22.3833	CSA_5mC_peak_1766	PF3D7_0607900		conserved Plasmodium protein, unknown function
Pf3D7_06_v3	339501	340222	722	340037	194	35.2485	2.81737	33.7778	CSA_5mC_peak_1767	PF3D7_0608100		conserved Plasmodium protein, unknown function
Pf3D7_06_v3	340330	340642	313	340467	167	24.8948	2.49231	23.6203	CSA_5mC_peak_1768	PF3D7_0608100		conserved Plasmodium protein, unknown function
Pf3D7_06_v3	340765	341178	414	341028	161	16.6954	2.07979	15.5829	CSA_5mC_peak_1769	PF3D7_0608100		conserved Plasmodium protein, unknown function
Pf3D7_06_v3	341412	341882	471	341566	218	53.8866	3.50737	51.9902	CSA_5mC_peak_1770	PF3D7_0608100		conserved Plasmodium protein, unknown function
Pf3D7_06_v3	343710	344248	539	343946	252	73.8419	4.05396	71.4173	CSA_5mC_peak_1771	PF3D7_0608300		heptatricopeptide repeat-containing protein, putative
Pf3D7_06_v3	345730	345969	240	345807	140	13.2716	1.98865	12.2312	CSA_5mC_peak_1772	PF3D7_0608300		heptatricopeptide repeat-containing protein, putative
Pf3D7_06_v3	348036	348351	316	348218	155	19.3997	2.26727	18.2326	CSA_5mC_peak_1773	PF3D7_0608310	SAM50	sorting assembly machinery 50 kDa subunit, putative
Pf3D7_06_v3	355381	355824	444	355582	260	63.7907	3.50818	61.6377	CSA_5mC_peak_1774	PF3D7_0608600		conserved Plasmodium protein, unknown function
Pf3D7_06_v3	359311	359822	512	359707	123	9.00707	1.78744	8.06765	CSA_5mC_peak_1775	PF3D7_0608700	CCT6	T-complex protein 1 subunit zeta
Pf3D7_06_v3	365300	365757	458	365572	153	12.1343	1.86022	11.1188	CSA_5mC_peak_1776	PF3D7_0608900		conserved Plasmodium protein, unknown function
Pf3D7_06_v3	367151	367518	368	367335	216	39.2615	2.82905	37.7103	CSA_5mC_peak_1777	PF3D7_0608900		conserved Plasmodium protein, unknown function
Pf3D7_06_v3	369778	370052	275	369904	151	18.616	2.24786	17.4647	CSA_5mC_peak_1778	PF3D7_0609000	NUP637	nucleoporin NUP637, putative
Pf3D7_06_v3	370251	370941	691	370789	171	22.9052	2.35618	21.6688	CSA_5mC_peak_1779	PF3D7_0609000	NUP637	nucleoporin NUP637, putative
Pf3D7_06_v3	373038	373415	378	373210	175	25.4495	2.46344	24.1648	CSA_5mC_peak_1780	PF3D7_0609000	NUP637	nucleoporin NUP637, putative
Pf3D7_06_v3	376412	376761	350	376631	140	9.54586	1.75439	8.59273	CSA_5mC_peak_1781	PF3D7_0609000	NUP637	nucleoporin NUP637, putative
Pf3D7_06_v3	380189	380797	609	380400	232	47.1202	3.04905	45.3942	CSA_5mC_peak_1782	PF3D7_0609000	NUP637	nucleoporin NUP637, putative
Pf3D7_06_v3	382143	382526	384	382329	208	31.9312	2.55488	30.524	CSA_5mC_peak_1783	PF3D7_0609000	NUP637	nucleoporin NUP637, putative
Pf3D7_06_v3	384243	384614	372	384421	238	48.5041	3.05867	46.7447	CSA_5mC_peak_1784	PF3D7_0609000	NUP637	nucleoporin NUP637, putative
Pf3D7_06_v3	385653	385945	293	385806	164	20.6972	2.28215	19.5037	CSA_5mC_peak_1785	PF3D7_0609000	NUP637	nucleoporin NUP637, putative
Pf3D7_06_v3	386995	387421	427	387195	225	44.1701	2.97731	42.5137	CSA_5mC_peak_1786	PF3D7_0609000	NUP637	nucleoporin NUP637, putative
Pf3D7_06_v3	395974	396247	274	396058	139	16.36	2.18962	15.2544	CSA_5mC_peak_1787	PF3D7_0609300		conserved Plasmodium protein, unknown function
Pf3D7_06_v3	396415	396868	454	396620	170	23.8185	2.41177	22.5644	CSA_5mC_peak_1788	PF3D7_0609300		conserved Plasmodium protein, unknown function
Pf3D7_06_v3	397088	397574	487	397388	163	14.7558	1.96443	13.684	CSA_5mC_peak_1789	PF3D7_0609300		conserved Plasmodium protein, unknown function
Pf3D7_06_v3	398139	398409	271	398311	154	22.0409	2.42906	20.8211	CSA_5mC_peak_1790	PF3D7_0609300		conserved Plasmodium protein, unknown function
Pf3D7_06_v3	399585	399879	295	399702	152	22.5587	2.47605	21.3285	CSA_5mC_peak_1791	PF3D7_0609400	CLS	mitochondrial cardiolipin synthase, putative
Pf3D7_06_v3	400638	401902	1265	400907	237	51.5358	3.19903	49.6998	CSA_5mC_peak_1792	PF3D7_0609400	CLS	mitochondrial cardiolipin synthase, putative
Pf3D7_06_v3	408839	409372	534	409214	150	9.82492	1.73603	8.86496	CSA_5mC_peak_1793	PF3D7_0609600		conserved Plasmodium protein, unknown function
Pf3D7_06_v3	411473	411787	315	411611	145	15.536	2.10059	14.447	CSA_5mC_peak_1794	PF3D7_0609600		conserved Plasmodium protein, unknown function
Pf3D7_06_v3	414208	414690	483	414448	221	42.3554	2.92893	40.7383	CSA_5mC_peak_1795	PF3D7_0609700	KIC6	protein KIC6
Pf3D7_06_v3	414918	417526	2609	415666	244	56.4034	3.34709	54.4412	CSA_5mC_peak_1796	PF3D7_0609700	KIC6	protein KIC6
Pf3D7_06_v3	418593	419148	556	418735	183	25.8446	2.42911	24.5523	CSA_5mC_peak_1797	PF3D7_0609700	KIC6	protein KIC6
Pf3D7_06_v3	421722	422179	458	421878	119	10.8658	1.942	9.88094	CSA_5mC_peak_1798	PF3D7_0609800	DHHC2	palmitoyltransferase DHHC2, putative
Pf3D7_06_v3	425912	426265	354	426145	132	7.93493	1.67737	7.02429	CSA_5mC_peak_1799	PF3D7_0609900		conserved Plasmodium protein, unknown function
Pf3D7_06_v3	426459	426865	407	426670	248	56.0561	3.29415	54.1029	CSA_5mC_peak_1800	PF3D7_0609900		conserved Plasmodium protein, unknown function
Pf3D7_06_v3	430663	431290	628	431007	168	24.3264	2.45359	23.0627	CSA_5mC_peak_1801	PF3D7_0609900		conserved Plasmodium protein, unknown function
Pf3D7_06_v3	433825	434177	353	434000	180	31.4542	2.74204	30.0559	CSA_5mC_peak_1802	PF3D7_0610000		ribosomal protein L19, mitochondrial, putative
Pf3D7_06_v3	434656	435919	1264	435601	258	64.9286	3.5773	62.7452	CSA_5mC_peak_1803	PF3D7_0610100	SLU7	pre-mRNA-splicing factor SLU7, putative
Pf3D7_06_v3	437843	440428	2586	438128	289	79.5914	3.8617	77.009	CSA_5mC_peak_1804	PF3D7_0610200	RBM25	RNA-binding protein 25, putative
Pf3D7_06_v3	449287	449575	289	449420	126	13.055	2.05528	12.0188	CSA_5mC_peak_1805	PF3D7_0610600	CDPK2	calcium-dependent protein kinase 2
Pf3D7_06_v3	453967	454447	481	454182	252	64.0784	3.60382	61.9169	CSA_5mC_peak_1806	PF3D7_0610800	TK	transketolase
Pf3D7_06_v3	454760	455201	442	455016	207	35.3687	2.71915	33.8957	CSA_5mC_peak_1807	PF3D7_0610800	TK	transketolase
Pf3D7_06_v3	456975	457217	243	457114	122	8.698	1.76968	7.76643	CSA_5mC_peak_1808	PF3D7_0610900	SPT5	transcription elongation factor SPT5, putative
Pf3D7_06_v3	458833	459204	372	459052	207	34.9663	2.70049	33.5006	CSA_5mC_peak_1809	PF3D7_0610900	SPT5	transcription elongation factor SPT5, putative
Pf3D7_06_v3	459686	460620	935	460361	278	82.1356	4.09654	79.4774	CSA_5mC_peak_1810	PF3D7_0610900	SPT5	transcription elongation factor SPT5, putative
Pf3D7_06_v3	462325	462689	365	462555	172	22.444	2.32535	21.2164	CSA_5mC_peak_1811	intergenic
Pf3D7_06_v3	465666	465942	277	465824	171	25.119	2.47467	23.8401	CSA_5mC_peak_1812	intergenic
Pf3D7_06_v3	472562	472853	292	472704	155	12.1492	1.85309	11.1335	CSA_5mC_peak_1813	PF3D7_0611400	SWIB	SWI/SNF-related matrix-associated actin-dependent regulator of chromatin
Pf3D7_06_v3	485704	487215	1512	485971	259	58.102	3.28058	56.0973	CSA_5mC_peak_1814	PF3D7_0611600	BTP1	basal complex transmembrane protein 1
Pf3D7_06_v3	492133	492382	250	492183	123	5.75909	1.5502	4.91318	CSA_5mC_peak_1815	PF3D7_0611800		conserved Plasmodium protein, unknown function
Pf3D7_06_v3	492448	493301	854	493202	151	11.7731	1.8473	10.7672	CSA_5mC_peak_1816	PF3D7_0611800		conserved Plasmodium protein, unknown function
Pf3D7_06_v3	493962	494502	541	494250	149	14.6062	2.02281	13.537	CSA_5mC_peak_1817	PF3D7_0611800		conserved Plasmodium protein, unknown function
Pf3D7_06_v3	498094	498506	413	498318	279	67.2973	3.47013	65.0518	CSA_5mC_peak_1818	PF3D7_0611800		conserved Plasmodium protein, unknown function
Pf3D7_06_v3	503750	504057	308	503874	139	17.549	2.26567	16.4188	CSA_5mC_peak_1819	intergenic
Pf3D7_06_v3	506539	506793	255	506670	100	5.81534	1.63391	4.96784	CSA_5mC_peak_1820	PF3D7_0611900		lsm12, putative
Pf3D7_06_v3	509152	509498	347	509310	203	45.0328	3.22718	43.3563	CSA_5mC_peak_1821	PF3D7_0612100	EIF3L	eukaryotic translation initiation factor 3 subunit L, putative
Pf3D7_06_v3	513286	513561	276	513404	123	10.5706	1.89863	9.59272	CSA_5mC_peak_1822	PF3D7_0612200	LRR6	leucine-rich repeat protein
Pf3D7_06_v3	515645	518409	2765	517556	234	58.2106	3.53362	56.204	CSA_5mC_peak_1823	PF3D7_0612200	LRR6	leucine-rich repeat protein
Pf3D7_06_v3	518963	519378	416	519187	206	31.8744	2.56542	30.4681	CSA_5mC_peak_1824	PF3D7_0612200	LRR6	leucine-rich repeat protein
Pf3D7_06_v3	524151	524486	336	524286	154	17.4314	2.15987	16.3039	CSA_5mC_peak_1825	PF3D7_0612600	NCS6	cytoplasmic tRNA 2-thiolation protein 1, putative
Pf3D7_06_v3	528711	529069	359	528857	116	7.65208	1.7179	6.74945	CSA_5mC_peak_1826	PF3D7_0612800	P12p	6-cysteine protein P12p
Pf3D7_06_v3	532214	533120	907	532841	269	65.653	3.4977	63.4495	CSA_5mC_peak_1827	PF3D7_0612900	NOG1	nucleolar GTP-binding protein 1, putative
Pf3D7_06_v3	540610	541823	1214	540939	301	103.379	4.72214	100.107	CSA_5mC_peak_1828	PF3D7_0613300	ROP14	rhoptry protein ROP14
Pf3D7_06_v3	544587	545010	424	544807	227	53.395	3.38243	51.512	CSA_5mC_peak_1829	PF3D7_0613300	ROP14	rhoptry protein ROP14
Pf3D7_06_v3	547329	547703	375	547554	113	7.37177	1.70894	6.47698	CSA_5mC_peak_1830	PF3D7_0613400	RPL18	50S ribosomal protein L18, apicoplast, putative
Pf3D7_06_v3	548412	548869	458	548528	122	7.31256	1.66896	6.41939	CSA_5mC_peak_1831	PF3D7_0613500		AP-3 complex subunit beta, putative
Pf3D7_06_v3	551100	551565	466	551485	144	19.4172	2.34658	18.2492	CSA_5mC_peak_1832	PF3D7_0613500		AP-3 complex subunit beta, putative
Pf3D7_06_v3	553622	553851	230	553689	119	10.7182	1.93121	9.73653	CSA_5mC_peak_1833	intergenic
Pf3D7_06_v3	555066	555388	323	555242	183	29.7566	2.62818	28.3901	CSA_5mC_peak_1834	PF3D7_0613600		conserved Plasmodium protein, unknown function
Pf3D7_06_v3	556157	556651	495	556319	132	11.1781	1.8945	10.1857	CSA_5mC_peak_1835	PF3D7_0613600		conserved Plasmodium protein, unknown function
Pf3D7_06_v3	560212	560677	466	560422	204	40.081	2.96869	38.5127	CSA_5mC_peak_1836	PF3D7_0613700		syntaxin-binding protein, putative
Pf3D7_06_v3	566218	567284	1067	566781	200	38.8587	2.94474	37.3153	CSA_5mC_peak_1837	PF3D7_0613800	ApiAP2	AP2 domain transcription factor, putative
Pf3D7_06_v3	568786	569730	945	569464	253	66.9881	3.72296	64.7499	CSA_5mC_peak_1838	PF3D7_0613800	ApiAP2	AP2 domain transcription factor, putative
Pf3D7_06_v3	571729	572119	391	571877	174	24.6398	2.42778	23.3699	CSA_5mC_peak_1839	PF3D7_0613800	ApiAP2	AP2 domain transcription factor, putative
Pf3D7_06_v3	572199	572811	613	572609	283	74.6774	3.72576	72.2314	CSA_5mC_peak_1840	PF3D7_0613800	ApiAP2	AP2 domain transcription factor, putative
Pf3D7_06_v3	573879	574412	534	574045	205	36.423	2.78398	34.9289	CSA_5mC_peak_1841	PF3D7_0613800	ApiAP2	AP2 domain transcription factor, putative
Pf3D7_06_v3	574641	575041	401	574832	163	18.424	2.16372	17.2762	CSA_5mC_peak_1842	PF3D7_0613800	ApiAP2	AP2 domain transcription factor, putative
Pf3D7_06_v3	575414	576941	1528	576440	227	47.8026	3.12331	46.0605	CSA_5mC_peak_1843	PF3D7_0613800	ApiAP2	AP2 domain transcription factor, putative
Pf3D7_06_v3	577799	578145	347	577972	159	15.4108	2.01882	14.3244	CSA_5mC_peak_1844	PF3D7_0613800	ApiAP2	AP2 domain transcription factor, putative
Pf3D7_06_v3	578204	578545	342	578397	153	15.9698	2.08123	14.8726	CSA_5mC_peak_1845	PF3D7_0613800	ApiAP2	AP2 domain transcription factor, putative
Pf3D7_06_v3	580127	581815	1689	580873	260	68.6484	3.71777	66.3659	CSA_5mC_peak_1846	PF3D7_0613900	MyoE	myosin E, putative
Pf3D7_06_v3	581893	583336	1444	582701	250	55.4822	3.25157	53.5432	CSA_5mC_peak_1847	PF3D7_0613900	MyoE	myosin E, putative
Pf3D7_06_v3	589317	589856	540	589533	209	28.4782	2.3951	27.1362	CSA_5mC_peak_1848	PF3D7_0614100		filamin domain-containing protein, putative
Pf3D7_06_v3	590319	590996	678	590830	184	24.4638	2.35394	23.1976	CSA_5mC_peak_1849	PF3D7_0614100		filamin domain-containing protein, putative
Pf3D7_06_v3	592030	592300	271	592149	169	25.2396	2.4961	23.9585	CSA_5mC_peak_1850	PF3D7_0614100		filamin domain-containing protein, putative
Pf3D7_06_v3	599296	599631	336	599469	164	17.6891	2.1183	16.5562	CSA_5mC_peak_1851	PF3D7_0614300	MFR1	major facilitator superfamily-related transporter, putative
Pf3D7_06_v3	600240	600547	308	600399	171	28.2101	2.64332	26.8726	CSA_5mC_peak_1852	PF3D7_0614300	MFR1	major facilitator superfamily-related transporter, putative
Pf3D7_06_v3	604548	605050	503	604769	164	19.5212	2.21782	18.3512	CSA_5mC_peak_1853	PF3D7_0614400	CWF7	pre-mRNA-splicing factor CWF7, putative
Pf3D7_06_v3	606173	606446	274	606302	121	6.87023	1.63984	5.99008	CSA_5mC_peak_1854	PF3D7_0614500	RPL19	60S ribosomal protein L19
Pf3D7_06_v3	609589	609856	268	609747	159	20.7351	2.31702	19.5408	CSA_5mC_peak_1855	PF3D7_0614600		conserved Plasmodium protein, unknown function
Pf3D7_06_v3	610285	610558	274	610474	126	6.8567	1.62201	5.97699	CSA_5mC_peak_1856	PF3D7_0614600		conserved Plasmodium protein, unknown function
Pf3D7_06_v3	612997	613552	556	613170	178	30.5645	2.71174	29.1828	CSA_5mC_peak_1857	PF3D7_0614700		F-box protein FBXO6, putative
Pf3D7_06_v3	615837	616432	596	616149	279	72.0594	3.66039	69.6832	CSA_5mC_peak_1858	PF3D7_0614800	NTHL1	endonuclease III-like protein 1, putative
Pf3D7_06_v3	618247	618518	272	618379	152	11.329	1.81745	10.3329	CSA_5mC_peak_1859	PF3D7_0614900		conserved Plasmodium membrane protein, unknown function
Pf3D7_06_v3	619852	620329	478	620069	250	70.757	3.93352	68.4157	CSA_5mC_peak_1860	PF3D7_0614900		conserved Plasmodium membrane protein, unknown function
Pf3D7_06_v3	620888	621513	626	621121	220	34.3007	2.58232	32.8484	CSA_5mC_peak_1861	PF3D7_0614900		conserved Plasmodium membrane protein, unknown function
Pf3D7_06_v3	622283	622648	366	622473	177	32.3179	2.81587	30.9033	CSA_5mC_peak_1862	PF3D7_0615000		conserved Plasmodium protein, unknown function
Pf3D7_06_v3	623782	624165	384	623984	134	10.9088	1.86721	9.92265	CSA_5mC_peak_1863	PF3D7_0615100	ENR	enoyl-acyl carrier reductase
Pf3D7_06_v3	625844	626291	448	626032	135	16.1091	2.20093	15.0081	CSA_5mC_peak_1864	PF3D7_0615200		conserved protein, unknown function
Pf3D7_06_v3	629094	629397	304	629278	171	30.347	2.7624	28.9692	CSA_5mC_peak_1865	PF3D7_0615300	GWT1	GPI-anchored wall transfer protein 1, putative
Pf3D7_06_v3	629833	630184	352	630011	209	43.3824	3.08342	41.7431	CSA_5mC_peak_1866	PF3D7_0615300	GWT1	GPI-anchored wall transfer protein 1, putative
Pf3D7_06_v3	632816	633125	310	632973	136	10.9312	1.85949	9.94443	CSA_5mC_peak_1867	PF3D7_0615400		ribonuclease, putative
Pf3D7_06_v3	634047	635589	1543	634500	238	50.0306	3.12441	48.2324	CSA_5mC_peak_1868	PF3D7_0615400		ribonuclease, putative
Pf3D7_06_v3	636482	637487	1006	637096	257	75.0418	4.04423	72.5866	CSA_5mC_peak_1869	PF3D7_0615400		ribonuclease, putative
Pf3D7_06_v3	638499	639138	640	638927	180	34.9102	2.92918	33.4455	CSA_5mC_peak_1870	PF3D7_0615400		ribonuclease, putative
Pf3D7_06_v3	639444	640173	730	639676	238	53.4419	3.274	51.5574	CSA_5mC_peak_1871	PF3D7_0615400		ribonuclease, putative
Pf3D7_06_v3	641138	641471	334	641306	188	33.4043	2.77508	31.9691	CSA_5mC_peak_1872	PF3D7_0615400		ribonuclease, putative
Pf3D7_06_v3	644795	645313	519	645086	170	30.1978	2.76332	28.8232	CSA_5mC_peak_1873	PF3D7_0615500	CRK5	cdc2-related protein kinase 5
Pf3D7_06_v3	647960	648431	472	648181	141	14.229	2.04304	13.1674	CSA_5mC_peak_1874	PF3D7_0615600		zinc finger protein, putative
Pf3D7_06_v3	648710	649157	448	648874	186	26.5512	2.44462	25.2453	CSA_5mC_peak_1875	PF3D7_0615600		zinc finger protein, putative
Pf3D7_06_v3	649741	650218	478	649907	195	38.4498	2.97068	36.9151	CSA_5mC_peak_1876	PF3D7_0615600		zinc finger protein, putative
Pf3D7_06_v3	650746	651124	379	650947	157	22.3172	2.42223	21.0918	CSA_5mC_peak_1877	PF3D7_0615600		zinc finger protein, putative
Pf3D7_06_v3	660313	660846	534	660591	210	40.1343	2.91838	38.5647	CSA_5mC_peak_1878	PF3D7_0615800	COG4	conserved oligomeric Golgi complex subunit 4, putative
Pf3D7_06_v3	663733	664235	503	664057	258	60.0372	3.36961	57.9835	CSA_5mC_peak_1879	PF3D7_0615900		protein phosphatase, putative
Pf3D7_06_v3	664473	664874	402	664658	150	13.4934	1.95237	12.4491	CSA_5mC_peak_1880	PF3D7_0615900		protein phosphatase, putative
Pf3D7_06_v3	666630	667032	403	666848	151	22.156	2.45987	20.9336	CSA_5mC_peak_1881	PF3D7_0615900		protein phosphatase, putative
Pf3D7_06_v3	667534	667834	301	667684	135	12.978	1.99688	11.9441	CSA_5mC_peak_1882	PF3D7_0615900		protein phosphatase, putative
Pf3D7_06_v3	672532	672856	325	672710	160	18.1215	2.16405	16.9799	CSA_5mC_peak_1883	PF3D7_0616100		conserved Plasmodium protein, unknown function
Pf3D7_06_v3	674663	675204	542	674852	245	54.4885	3.25446	52.5762	CSA_5mC_peak_1884	PF3D7_0616200	NDC80	kinetochore protein NDC80, putative
Pf3D7_06_v3	676811	677217	407	677032	203	35.2079	2.74203	33.7378	CSA_5mC_peak_1885	PF3D7_0616300		conserved Plasmodium protein, unknown function
Pf3D7_06_v3	680536	680815	280	680673	157	21.3202	2.36446	20.1147	CSA_5mC_peak_1886	PF3D7_0616400		conserved Plasmodium protein, unknown function
Pf3D7_06_v3	686219	686916	698	686529	210	48.7166	3.33835	46.9514	CSA_5mC_peak_1887	PF3D7_0616500	TLP	TRAP-like protein
Pf3D7_06_v3	687365	688574	1210	688359	213	43.4332	3.04829	41.7926	CSA_5mC_peak_1888	PF3D7_0616500	TLP	TRAP-like protein
Pf3D7_06_v3	690072	691123	1052	690688	176	21.4976	2.25215	20.2881	CSA_5mC_peak_1889	PF3D7_0616600		conserved protein, unknown function
Pf3D7_06_v3	692947	693318	372	693147	183	28.9555	2.58696	27.6038	CSA_5mC_peak_1890	PF3D7_0616700		ras GTPAse, putative
Pf3D7_06_v3	699280	699881	602	699495	218	51.5206	3.38951	49.685	CSA_5mC_peak_1891	PF3D7_0616900		conserved Plasmodium protein, unknown function
Pf3D7_06_v3	700226	701215	990	700904	216	48.6289	3.26923	46.8661	CSA_5mC_peak_1892	PF3D7_0616900		conserved Plasmodium protein, unknown function
Pf3D7_06_v3	703132	703419	288	703275	154	13.5579	1.93775	12.5122	CSA_5mC_peak_1893	PF3D7_0616900		conserved Plasmodium protein, unknown function
Pf3D7_06_v3	703510	703810	301	703676	175	24.1252	2.39401	22.8658	CSA_5mC_peak_1894	PF3D7_0616900		conserved Plasmodium protein, unknown function
Pf3D7_06_v3	709797	710331	535	710047	219	42.962	2.97318	41.3318	CSA_5mC_peak_1895	PF3D7_0617100		AP-2 complex subunit alpha, putative
Pf3D7_06_v3	710662	711005	344	710822	199	31.8607	2.61285	30.4548	CSA_5mC_peak_1896	PF3D7_0617100		AP-2 complex subunit alpha, putative
Pf3D7_06_v3	717326	717688	363	717488	192	29.4504	2.54633	28.0894	CSA_5mC_peak_1897	PF3D7_0617200		BFR1 domain-containing protein, putative
Pf3D7_06_v3	717936	718698	763	718276	301	75.5798	3.58739	73.1101	CSA_5mC_peak_1898	PF3D7_0617200		BFR1 domain-containing protein, putative
Pf3D7_06_v3	722542	722835	294	722709	185	31.8192	2.71864	30.414	CSA_5mC_peak_1899	PF3D7_0617400	VAR	erythrocyte membrane protein 1, PfEMP1
Pf3D7_06_v3	724190	725742	1553	724811	229	55.2289	3.44785	53.2966	CSA_5mC_peak_1900	PF3D7_0617400	VAR	erythrocyte membrane protein 1, PfEMP1
Pf3D7_06_v3	725816	727007	1192	726343	177	16.8844	2.01408	15.7679	CSA_5mC_peak_1901	PF3D7_0617400	VAR	erythrocyte membrane protein 1, PfEMP1
Pf3D7_06_v3	728041	728820	780	728389	197	38.7408	2.9666	37.2004	CSA_5mC_peak_1902	PF3D7_0617400	VAR	erythrocyte membrane protein 1, PfEMP1
Pf3D7_06_v3	729134	729668	535	729374	176	25.7461	2.47192	24.4555	CSA_5mC_peak_1903	PF3D7_0617400	VAR	erythrocyte membrane protein 1, PfEMP1
Pf3D7_06_v3	730122	730599	478	730342	139	10.6787	1.8302	9.69801	CSA_5mC_peak_1904	PF3D7_0617400	VAR	erythrocyte membrane protein 1, PfEMP1
Pf3D7_06_v3	730675	731526	852	730897	184	23.6306	2.3128	22.3804	CSA_5mC_peak_1905	PF3D7_0617400	VAR	erythrocyte membrane protein 1, PfEMP1
Pf3D7_06_v3	738801	739136	336	739010	186	22.7583	2.25884	21.5247	CSA_5mC_peak_1906	PF3D7_0617600		stevor
Pf3D7_06_v3	741729	742077	349	741966	124	7.56758	1.68017	6.66714	CSA_5mC_peak_1907	PF3D7_0617700	RIF	rifin
Pf3D7_06_v3	758692	759528	837	759325	177	22.4852	2.29674	21.257	CSA_5mC_peak_1908	PF3D7_0618000		conserved Plasmodium membrane protein, unknown function
Pf3D7_06_v3	763468	763853	386	763628	223	46.2137	3.08708	44.5098	CSA_5mC_peak_1909	PF3D7_0618100		conserved Plasmodium protein, unknown function
Pf3D7_06_v3	764655	765332	678	764842	187	23.9276	2.30993	22.6715	CSA_5mC_peak_1910	PF3D7_0618200		conserved protein, unknown function
Pf3D7_06_v3	773875	774172	298	774066	171	30.7221	2.78353	29.3372	CSA_5mC_peak_1911	intergenic
Pf3D7_06_v3	774616	774901	286	774774	111	6.04957	1.61141	5.19478	CSA_5mC_peak_1912	PF3D7_0618500	MDH	malate dehydrogenase
Pf3D7_06_v3	778729	779219	491	778945	260	65.3667	3.57537	63.1714	CSA_5mC_peak_1913	PF3D7_0618700		trafficking protein particle complex subunit 6A, putative
Pf3D7_06_v3	785104	785649	546	785315	225	35.9149	2.61935	34.431	CSA_5mC_peak_1914	PF3D7_0618900	GPI1	phosphatidylinositol N-acetylglucosaminyltransferase subunit GPI1
Pf3D7_06_v3	791021	792312	1292	791336	280	80.7874	4.01369	78.1688	CSA_5mC_peak_1915	PF3D7_0619000		FPL domain-containing protein, putative
Pf3D7_06_v3	792979	793446	468	793286	188	23.8907	2.30244	22.6353	CSA_5mC_peak_1916	PF3D7_0619000		FPL domain-containing protein, putative
Pf3D7_06_v3	793575	794131	557	793816	249	59.9474	3.45299	57.8957	CSA_5mC_peak_1917	PF3D7_0619000		FPL domain-containing protein, putative
Pf3D7_06_v3	799066	799588	523	799352	282	88.0422	4.30594	85.2215	CSA_5mC_peak_1918	PF3D7_0619200		conserved Plasmodium protein, unknown function
Pf3D7_06_v3	800116	800668	553	800332	125	5.1253	1.49673	4.30045	CSA_5mC_peak_1919	PF3D7_0619200		conserved Plasmodium protein, unknown function
Pf3D7_06_v3	801146	801714	569	801346	214	30.4373	2.45213	29.0578	CSA_5mC_peak_1920	PF3D7_0619200		conserved Plasmodium protein, unknown function
Pf3D7_06_v3	805721	806050	330	805890	221	30.9593	2.4349	29.5703	CSA_5mC_peak_1921	PF3D7_0619300		conserved Plasmodium protein, unknown function
Pf3D7_06_v3	807572	807799	228	807653	116	5.92826	1.5846	5.07683	CSA_5mC_peak_1922	PF3D7_0619300		conserved Plasmodium protein, unknown function
Pf3D7_06_v3	808046	808323	278	808151	155	16.2379	2.08579	15.1348	CSA_5mC_peak_1923	PF3D7_0619300		conserved Plasmodium protein, unknown function
Pf3D7_06_v3	808418	808663	246	808594	113	5.34546	1.54731	4.51322	CSA_5mC_peak_1924	PF3D7_0619300		conserved Plasmodium protein, unknown function
Pf3D7_06_v3	809348	810270	923	809720	194	31.8398	2.64844	30.4342	CSA_5mC_peak_1925	PF3D7_0619300		conserved Plasmodium protein, unknown function
Pf3D7_06_v3	810424	811521	1098	810801	297	84.3895	3.96823	81.6693	CSA_5mC_peak_1926	PF3D7_0619300		conserved Plasmodium protein, unknown function
Pf3D7_06_v3	812358	813816	1459	813320	245	56.4378	3.33894	54.4748	CSA_5mC_peak_1927	PF3D7_0619300		conserved Plasmodium protein, unknown function
Pf3D7_06_v3	813947	814338	392	814124	158	20.1	2.28763	18.9184	CSA_5mC_peak_1928	PF3D7_0619300		conserved Plasmodium protein, unknown function
Pf3D7_06_v3	815811	816070	260	815961	119	8.22651	1.74826	7.30792	CSA_5mC_peak_1929	PF3D7_0619400		cell division cycle protein 48 homologue, putative
Pf3D7_06_v3	816579	817669	1091	816815	156	16.4895	2.0947	15.3808	CSA_5mC_peak_1930	PF3D7_0619400		cell division cycle protein 48 homologue, putative
Pf3D7_06_v3	817901	818185	285	818016	132	9.32399	1.77106	8.37653	CSA_5mC_peak_1931	PF3D7_0619400		cell division cycle protein 48 homologue, putative
Pf3D7_06_v3	822729	823083	355	822918	163	17.9542	2.13808	16.8158	CSA_5mC_peak_1932	PF3D7_0619500	ACS12	acyl-CoA synthetase
Pf3D7_06_v3	826215	826594	380	826412	215	43.8671	3.05053	42.2169	CSA_5mC_peak_1933	PF3D7_0619600		conserved Plasmodium protein, unknown function
Pf3D7_06_v3	829584	830282	699	829811	205	40.1429	2.96265	38.5732	CSA_5mC_peak_1934	PF3D7_0619700		F-box protein FBXO1, putative
Pf3D7_06_v3	830582	830914	333	830738	208	41.9786	3.02452	40.3703	CSA_5mC_peak_1935	intergenic
Pf3D7_06_v3	835584	835954	371	835744	192	36.4846	2.89791	34.9898	CSA_5mC_peak_1936	PF3D7_0619800		conserved Plasmodium membrane protein, unknown function
Pf3D7_06_v3	839043	839301	259	839150	140	17.1956	2.23591	16.0726	CSA_5mC_peak_1937	PF3D7_0619800		conserved Plasmodium membrane protein, unknown function
Pf3D7_06_v3	842546	843027	482	842763	267	56.686	3.15729	54.7169	CSA_5mC_peak_1938	PF3D7_0620000	PIMMS43	PIMMS43 protein
Pf3D7_06_v3	851506	851901	396	851727	142	13.3619	1.98384	12.3196	CSA_5mC_peak_1939	PF3D7_0620400	MSP10	merozoite surface protein 10
Pf3D7_06_v3	855175	856107	933	855814	281	73.3336	3.6918	70.9224	CSA_5mC_peak_1940	PF3D7_0620500		cleavage stimulation factor subunit 1, putative
Pf3D7_06_v3	857786	858059	274	857924	145	9.9896	1.76359	9.02556	CSA_5mC_peak_1941	PF3D7_0620600		conserved Plasmodium protein, unknown function
Pf3D7_06_v3	863132	863389	258	863254	129	9.79478	1.81561	8.83544	CSA_5mC_peak_1942	PF3D7_0621000		conserved Plasmodium protein, unknown function
Pf3D7_06_v3	863510	863764	255	863640	139	11.0869	1.85605	10.097	CSA_5mC_peak_1943	PF3D7_0621000		conserved Plasmodium protein, unknown function
Pf3D7_06_v3	867212	867504	293	867356	167	20.2879	2.24146	19.1023	CSA_5mC_peak_1944	PF3D7_0621100		conserved Plasmodium protein, unknown function
Pf3D7_06_v3	871192	871536	345	871344	155	17.1345	2.137	16.0131	CSA_5mC_peak_1945	PF3D7_0621200	PDX1	pyridoxine biosynthesis protein PDX1
Pf3D7_06_v3	871836	872170	335	872036	148	13.5595	1.96582	12.5135	CSA_5mC_peak_1946	PF3D7_0621200	PDX1	pyridoxine biosynthesis protein PDX1
Pf3D7_06_v3	873773	874409	637	874010	288	82.6955	4.00046	80.0215	CSA_5mC_peak_1947	PF3D7_0621300	PUF3	mRNA-binding protein PUF3
Pf3D7_06_v3	879022	879347	326	879219	115	4.70905	1.48923	3.89872	CSA_5mC_peak_1948	PF3D7_0621400	ALV7	Pf77 protein
Pf3D7_06_v3	884875	885961	1087	885047	208	29.864	2.46222	28.4952	CSA_5mC_peak_1949	PF3D7_0621700		RAP protein, putative
Pf3D7_06_v3	887254	887597	344	887403	194	33.2391	2.71726	31.807	CSA_5mC_peak_1950	PF3D7_0621700		RAP protein, putative
Pf3D7_06_v3	895230	895705	476	895568	146	17.3309	2.20363	16.2053	CSA_5mC_peak_1951	PF3D7_0621900	SRP68	signal recognition particle subunit SRP68, putative
Pf3D7_06_v3	898363	898812	450	898521	186	24.3802	2.3378	23.1155	CSA_5mC_peak_1952	PF3D7_0622100		conserved Plasmodium protein, unknown function
Pf3D7_06_v3	901102	901518	417	901316	166	20.2366	2.2447	19.052	CSA_5mC_peak_1953	PF3D7_0622100		conserved Plasmodium protein, unknown function
Pf3D7_06_v3	902054	902282	229	902212	124	5.26487	1.50992	4.43502	CSA_5mC_peak_1954	PF3D7_0622100		conserved Plasmodium protein, unknown function
Pf3D7_06_v3	904592	905242	651	905011	277	69.2116	3.56505	66.9138	CSA_5mC_peak_1955	PF3D7_0622200	MIAB	tRNA-2-methylthio-N(6)-dimethylallyladenosine synthase
Pf3D7_06_v3	905872	906293	422	906182	134	11.7618	1.92299	10.7566	CSA_5mC_peak_1956	PF3D7_0622200	MIAB	tRNA-2-methylthio-N(6)-dimethylallyladenosine synthase
Pf3D7_06_v3	909294	909868	575	909818	119	4.8112	1.4872	3.99686	CSA_5mC_peak_1957	PF3D7_0622300		vacuolar transporter chaperone, putative
Pf3D7_06_v3	910350	910664	315	910504	156	19.9914	2.29476	18.8122	CSA_5mC_peak_1958	PF3D7_0622300		vacuolar transporter chaperone, putative
Pf3D7_06_v3	919654	920220	567	919836	112	5.13827	1.53328	4.31322	CSA_5mC_peak_1959	PF3D7_0622800		leucine--tRNA ligase, putative
Pf3D7_06_v3	920521	920844	324	920705	166	18.7265	2.16339	17.5724	CSA_5mC_peak_1960	PF3D7_0622800		leucine--tRNA ligase, putative
Pf3D7_06_v3	921491	921742	252	921643	104	3.31807	1.39203	2.56142	CSA_5mC_peak_1961	PF3D7_0622800		leucine--tRNA ligase, putative
Pf3D7_06_v3	922077	922662	586	922465	166	15.3625	1.98376	14.2781	CSA_5mC_peak_1962	PF3D7_0622800		leucine--tRNA ligase, putative
Pf3D7_06_v3	923281	923802	522	923536	227	49.1409	3.1843	47.3646	CSA_5mC_peak_1963	PF3D7_0622800		leucine--tRNA ligase, putative
Pf3D7_06_v3	925356	925837	482	925684	157	16.4281	2.08586	15.3211	CSA_5mC_peak_1964	PF3D7_0622900	AP2Tel	AP2 domain transcription factor AP2Tel
Pf3D7_06_v3	926686	926963	278	926823	140	11.5576	1.88123	10.5557	CSA_5mC_peak_1965	PF3D7_0622900	AP2Tel	AP2 domain transcription factor AP2Tel
Pf3D7_06_v3	927259	927761	503	927592	183	31.2153	2.70389	29.821	CSA_5mC_peak_1966	PF3D7_0622900	AP2Tel	AP2 domain transcription factor AP2Tel
Pf3D7_06_v3	927938	928799	862	928207	167	14.7539	1.94713	13.6824	CSA_5mC_peak_1967	PF3D7_0622900	AP2Tel	AP2 domain transcription factor AP2Tel
Pf3D7_06_v3	929171	929568	398	929312	113	3.75816	1.41284	2.98297	CSA_5mC_peak_1968	PF3D7_0622900	AP2Tel	AP2 domain transcription factor AP2Tel
Pf3D7_06_v3	942513	942775	263	942645	140	17.9166	2.28185	16.7789	CSA_5mC_peak_1969	PF3D7_0623100	NAB2	nuclear polyadenylated RNA-binding protein NAB2, putative
Pf3D7_06_v3	943358	943675	318	943560	131	12.6805	1.99972	11.6533	CSA_5mC_peak_1970	PF3D7_0623100	NAB2	nuclear polyadenylated RNA-binding protein NAB2, putative
Pf3D7_06_v3	948237	948471	235	948347	116	6.35762	1.61825	5.49283	CSA_5mC_peak_1971	PF3D7_0623300		EGF-like membrane protein, putative
Pf3D7_06_v3	954180	954443	264	954321	148	13.5595	1.96582	12.5135	CSA_5mC_peak_1972	PF3D7_0623500	SOD2	superoxide dismutase [Fe]
Pf3D7_06_v3	957741	958198	458	957981	219	44.4751	3.04286	42.8112	CSA_5mC_peak_1973	PF3D7_0623600		splicing factor-like protein 1, putative
Pf3D7_06_v3	964390	965109	720	964790	334	103.573	4.3008	100.293	CSA_5mC_peak_1974	PF3D7_0623800	TKL4	tyrosine kinase-like protein, putative
Pf3D7_06_v3	965230	965486	257	965383	132	6.52031	1.57988	5.651	CSA_5mC_peak_1975	PF3D7_0623800	TKL4	tyrosine kinase-like protein, putative
Pf3D7_06_v3	966744	967817	1074	967561	235	59.6784	3.59169	57.6342	CSA_5mC_peak_1976	PF3D7_0623800	TKL4	tyrosine kinase-like protein, putative
Pf3D7_06_v3	967904	968269	366	968073	149	14.7539	2.03154	13.6824	CSA_5mC_peak_1977	PF3D7_0623800	TKL4	tyrosine kinase-like protein, putative
Pf3D7_06_v3	969046	969273	228	969160	120	8.67185	1.77664	7.74094	CSA_5mC_peak_1978	PF3D7_0623800	TKL4	tyrosine kinase-like protein, putative
Pf3D7_06_v3	969459	970032	574	969654	169	23.0909	2.37946	21.8507	CSA_5mC_peak_1979	PF3D7_0623800	TKL4	tyrosine kinase-like protein, putative
Pf3D7_06_v3	973664	973899	236	973771	153	15.1126	2.03178	14.0323	CSA_5mC_peak_1980	PF3D7_0623800	TKL4	tyrosine kinase-like protein, putative
Pf3D7_06_v3	977068	977615	548	977261	152	22.5587	2.47605	21.3285	CSA_5mC_peak_1981	PF3D7_0623900		ribonuclease H2 subunit A, putative
Pf3D7_06_v3	981640	982437	798	981762	144	16.2633	2.1511	15.1598	CSA_5mC_peak_1982	PF3D7_0624000	HK	hexokinase
Pf3D7_06_v3	985295	985530	236	985429	118	9.31327	1.8333	8.3661	CSA_5mC_peak_1983	PF3D7_0624100		conserved protein, unknown function
Pf3D7_06_v3	985822	986139	318	985978	144	12.9576	1.94899	11.9259	CSA_5mC_peak_1984	PF3D7_0624200		SURP domain-containing protein, putative
Pf3D7_06_v3	990460	990857	398	990635	172	23.6573	2.38947	22.4068	CSA_5mC_peak_1985	PF3D7_0624400		conserved protein, unknown function
Pf3D7_06_v3	994071	994377	307	994244	172	31.1776	2.79972	29.7842	CSA_5mC_peak_1986	PF3D7_0624500	APC11	anaphase-promoting complex subunit 11, putative
Pf3D7_06_v3	999512	1000061	550	999779	167	23.976	2.44167	22.7192	CSA_5mC_peak_1987	PF3D7_0624600	ISWI	ISWI chromatin-remodeling complex ATPase
Pf3D7_06_v3	1000753	1001056	304	1000910	124	8.01531	1.71234	7.10264	CSA_5mC_peak_1988	PF3D7_0624600	ISWI	ISWI chromatin-remodeling complex ATPase
Pf3D7_06_v3	1001435	1001703	269	1001616	126	9.24824	1.7912	8.30262	CSA_5mC_peak_1989	PF3D7_0624600	ISWI	ISWI chromatin-remodeling complex ATPase
Pf3D7_06_v3	1001922	1003777	1856	1003386	237	55.8427	3.39177	53.8945	CSA_5mC_peak_1990	PF3D7_0624600	ISWI	ISWI chromatin-remodeling complex ATPase
Pf3D7_06_v3	1004126	1004535	410	1004309	225	44.2685	2.98171	42.6099	CSA_5mC_peak_1991	PF3D7_0624600	ISWI	ISWI chromatin-remodeling complex ATPase
Pf3D7_06_v3	1005027	1006396	1370	1005980	249	57.8155	3.36033	55.8184	CSA_5mC_peak_1992	PF3D7_0624600	ISWI	ISWI chromatin-remodeling complex ATPase
Pf3D7_06_v3	1007019	1007913	895	1007446	254	57.5733	3.30338	55.5815	CSA_5mC_peak_1993	PF3D7_0624600	ISWI	ISWI chromatin-remodeling complex ATPase
Pf3D7_06_v3	1008286	1008571	286	1008439	154	19.4332	2.27586	18.2648	CSA_5mC_peak_1994	PF3D7_0624600	ISWI	ISWI chromatin-remodeling complex ATPase
Pf3D7_06_v3	1012916	1013166	251	1012998	123	11.2758	1.9486	10.2807	CSA_5mC_peak_1995	PF3D7_0624800		conserved Plasmodium protein, unknown function
Pf3D7_06_v3	1017468	1017715	248	1017614	119	9.17142	1.81793	8.22753	CSA_5mC_peak_1996	PF3D7_0624900		GAS8-like protein, putative
Pf3D7_06_v3	1019864	1020158	295	1020009	167	28.9251	2.7188	27.5738	CSA_5mC_peak_1997	PF3D7_0625000	SMS1	sphingomyelin synthase 1, putative
Pf3D7_06_v3	1025126	1025600	475	1025407	241	60.493	3.56205	58.4274	CSA_5mC_peak_1998	PF3D7_0625200		conserved Plasmodium protein, unknown function
Pf3D7_06_v3	1026086	1026513	428	1026269	199	36.1717	2.82078	34.6829	CSA_5mC_peak_1999	PF3D7_0625200		conserved Plasmodium protein, unknown function
[truncated: 5,284 more rows]

## Sheet: NF54_5mC_peaks
chr	start	end	length	abs_summit	pileup	-log10(p-value)	fold_enrichment	-log10(q-value)	peak_name	gene	name	description
Pf3D7_01_v3	159	5469	5311	1581	259	85.2003	4.50759	82.539	NF_5mC_peak_1	intergenic
Pf3D7_01_v3	5612	6449	838	6023	138	25.2595	2.78829	23.9221	NF_5mC_peak_2	intergenic
Pf3D7_01_v3	8847	11361	2515	9725	232	65.4699	3.91341	63.3505	NF_5mC_peak_3	intergenic
Pf3D7_01_v3	11846	12181	336	12013	111	10.483	1.96162	9.45362	NF_5mC_peak_4	intergenic
Pf3D7_01_v3	19571	19930	360	19773	117	14.7597	2.24463	13.6309	NF_5mC_peak_5	intergenic
Pf3D7_01_v3	27727	28005	279	27855	98	11.0151	2.10155	9.97223	NF_5mC_peak_6	intergenic
Pf3D7_01_v3	29511	31033	1523	30738	135	18.482	2.35782	17.275	NF_5mC_peak_7	PF3D7_0100100	VAR	erythrocyte membrane protein 1, PfEMP1
Pf3D7_01_v3	31099	31636	538	31393	100	10.5094	2.04115	9.47964	NF_5mC_peak_8	PF3D7_0100100	VAR	erythrocyte membrane protein 1, PfEMP1
Pf3D7_01_v3	31776	32967	1192	31976	165	39.7253	3.39793	38.1309	NF_5mC_peak_9	PF3D7_0100100	VAR	erythrocyte membrane protein 1, PfEMP1
Pf3D7_01_v3	33104	35151	2048	33396	180	40.9322	3.26965	39.3161	NF_5mC_peak_10	PF3D7_0100100	VAR	erythrocyte membrane protein 1, PfEMP1
Pf3D7_01_v3	35369	35853	485	35586	123	21.9939	2.73115	20.7178	NF_5mC_peak_11	PF3D7_0100100	VAR	erythrocyte membrane protein 1, PfEMP1
Pf3D7_01_v3	37047	37293	247	37140	105	14.4873	2.3347	13.364	NF_5mC_peak_12	PF3D7_0100100	VAR	erythrocyte membrane protein 1, PfEMP1
Pf3D7_01_v3	39349	39769	421	39482	113	13.5821	2.18787	12.4793	NF_5mC_peak_13	PF3D7_0100200	RIF	rifin
Pf3D7_01_v3	42492	42798	307	42671	119	18.7446	2.52847	17.5323	NF_5mC_peak_14	PF3D7_0100300	VAR	erythrocyte membrane protein 1, PfEMP1
Pf3D7_01_v3	45462	46586	1125	45833	176	34.9572	2.97285	33.4475	NF_5mC_peak_15	PF3D7_0100300	VAR	erythrocyte membrane protein 1, PfEMP1
Pf3D7_01_v3	54304	54700	397	54495	127	23.8198	2.81926	22.5091	NF_5mC_peak_16	PF3D7_0100600	RIF	rifin
Pf3D7_01_v3	62603	63217	615	62803	138	23.9661	2.69917	22.6528	NF_5mC_peak_17	PF3D7_0100900	RIF	rifin
Pf3D7_01_v3	74787	75068	282	74892	106	14.872	2.35672	13.7402	NF_5mC_peak_18	PF3D7_0101300	MC-2TM	Pfmc-2TM Maurer's cleft two transmembrane protein
Pf3D7_01_v3	82258	82675	418	82464	120	17.0006	2.38604	15.8239	NF_5mC_peak_19	PF3D7_0101600	RIF	rifin
Pf3D7_01_v3	90651	91079	429	90869	169	35.7419	3.09694	34.2187	NF_5mC_peak_20	PF3D7_0101900	RIF	rifin
Pf3D7_01_v3	95151	95510	360	95306	123	16.5032	2.32207	15.3364	NF_5mC_peak_21	intergenic
Pf3D7_01_v3	99891	100568	678	100044	120	13.3237	2.1148	12.227	NF_5mC_peak_22	PF3D7_0102200	RESA	ring-infected erythrocyte surface antigen
Pf3D7_01_v3	101446	102530	1085	102164	192	60.0579	4.25091	58.0658	NF_5mC_peak_23	PF3D7_0102200	RESA	ring-infected erythrocyte surface antigen
Pf3D7_01_v3	107988	108324	337	108168	100	9.31606	1.93838	8.31673	NF_5mC_peak_24	intergenic
Pf3D7_01_v3	111465	112140	676	111785	186	48.8201	3.65404	47.06	NF_5mC_peak_25	PF3D7_0102500	EBA181	erythrocyte binding antigen-181
Pf3D7_01_v3	112881	113660	780	113209	304	112.307	5.08304	108.764	NF_5mC_peak_26	PF3D7_0102500	EBA181	erythrocyte binding antigen-181
Pf3D7_01_v3	113827	114106	280	113944	101	8.51416	1.86321	7.53693	NF_5mC_peak_27	PF3D7_0102500	EBA181	erythrocyte binding antigen-181
Pf3D7_01_v3	114698	115042	345	114867	131	16.9865	2.28946	15.81	NF_5mC_peak_28	PF3D7_0102500	EBA181	erythrocyte binding antigen-181
Pf3D7_01_v3	115225	115787	563	115532	159	29.7547	2.84698	28.3358	NF_5mC_peak_29	PF3D7_0102500	EBA181	erythrocyte binding antigen-181
Pf3D7_01_v3	118636	118876	241	118718	97	9.81043	2.00319	8.79867	NF_5mC_peak_30	PF3D7_0102600	FIKK1	serine/threonine protein kinase, FIKK family
Pf3D7_01_v3	119721	121047	1327	120278	219	64.3325	4.04201	62.2391	NF_5mC_peak_31	PF3D7_0102600	FIKK1	serine/threonine protein kinase, FIKK family
Pf3D7_01_v3	127661	128081	421	127861	143	24.6482	2.69163	23.3225	NF_5mC_peak_32	PF3D7_0102800		seipin domain-containing protein, putative
Pf3D7_01_v3	130084	130805	722	130573	211	58.8694	3.86206	56.9035	NF_5mC_peak_33	PF3D7_0102900		aspartate--tRNA ligase
Pf3D7_01_v3	134291	134534	244	134439	112	10.5315	1.95907	9.5004	NF_5mC_peak_34	PF3D7_0103100	VPS51	vacuolar protein sorting-associated protein 51, putative
Pf3D7_01_v3	134746	135253	508	135025	180	36.0706	2.99331	34.5416	NF_5mC_peak_35	PF3D7_0103100	VPS51	vacuolar protein sorting-associated protein 51, putative
Pf3D7_01_v3	135341	136126	786	135888	220	65.4376	4.08711	63.3191	NF_5mC_peak_36	PF3D7_0103100	VPS51	vacuolar protein sorting-associated protein 51, putative
Pf3D7_01_v3	137994	138296	303	138191	96	8.7132	1.91278	7.73008	NF_5mC_peak_37	PF3D7_0103100	VPS51	vacuolar protein sorting-associated protein 51, putative
Pf3D7_01_v3	138820	139397	578	139177	137	25.2177	2.79713	23.8815	NF_5mC_peak_38	PF3D7_0103100	VPS51	vacuolar protein sorting-associated protein 51, putative
Pf3D7_01_v3	140865	141368	504	141179	197	53.5894	3.77107	51.736	NF_5mC_peak_39	PF3D7_0103200	NT4	nucleoside transporter 4
Pf3D7_01_v3	144025	145129	1105	144874	222	70.8903	4.35876	68.6323	NF_5mC_peak_40	PF3D7_0103300		conserved protein, unknown function
Pf3D7_01_v3	145894	146310	417	146116	122	15.2864	2.24222	14.1456	NF_5mC_peak_41	PF3D7_0103300		conserved protein, unknown function
Pf3D7_01_v3	147862	148618	757	148087	190	54.062	3.90967	52.2005	NF_5mC_peak_42	PF3D7_0103400		zinc-carboxypeptidase, putative
Pf3D7_01_v3	148709	149242	534	149050	141	28.6067	2.98455	27.2084	NF_5mC_peak_43	PF3D7_0103400		zinc-carboxypeptidase, putative
Pf3D7_01_v3	149466	150572	1107	150322	206	57.075	3.83591	55.1501	NF_5mC_peak_44	PF3D7_0103400		zinc-carboxypeptidase, putative
Pf3D7_01_v3	152442	152692	251	152565	95	10.8665	2.11444	9.82671	NF_5mC_peak_45	PF3D7_0103400		zinc-carboxypeptidase, putative
Pf3D7_01_v3	157023	157445	423	157232	169	43.6198	3.58995	41.9555	NF_5mC_peak_46	PF3D7_0103500		conserved Plasmodium protein, unknown function
Pf3D7_01_v3	161328	162821	1494	162236	271	104.859	5.31497	101.57	NF_5mC_peak_47	PF3D7_0103600	PSH1	ATP-dependent DNA/RNA helicase PSH1
Pf3D7_01_v3	164770	165051	282	164911	90	8.50315	1.93638	7.52631	NF_5mC_peak_48	PF3D7_0103600	PSH1	ATP-dependent DNA/RNA helicase PSH1
Pf3D7_01_v3	166809	167061	253	166893	102	9.319	1.92526	8.31946	NF_5mC_peak_49	PF3D7_0103700	PSTK	L-seryl-tRNA(Sec) kinase, putative
Pf3D7_01_v3	174176	174560	385	174350	135	27.6307	2.99546	26.2495	NF_5mC_peak_50	PF3D7_0103900	PIESP15	parasite-infected erythrocyte surface protein
Pf3D7_01_v3	185179	185986	808	185805	202	66.5672	4.47116	64.4198	NF_5mC_peak_51	intergenic
Pf3D7_01_v3	190649	191258	610	190821	124	22.4453	2.75318	21.1607	NF_5mC_peak_52	PF3D7_0104300	UBP1	ubiquitin carboxyl-terminal hydrolase 1, putative
Pf3D7_01_v3	191649	192081	433	191954	120	10.7385	1.92703	9.7026	NF_5mC_peak_53	PF3D7_0104300	UBP1	ubiquitin carboxyl-terminal hydrolase 1, putative
Pf3D7_01_v3	192361	195463	3103	192550	232	85.6114	5.02732	82.9389	NF_5mC_peak_54	PF3D7_0104300	UBP1	ubiquitin carboxyl-terminal hydrolase 1, putative
Pf3D7_01_v3	195819	196250	432	196020	187	49.2787	3.66663	47.5096	NF_5mC_peak_55	PF3D7_0104300	UBP1	ubiquitin carboxyl-terminal hydrolase 1, putative
Pf3D7_01_v3	199015	199284	270	199118	99	11.1715	2.10675	10.1249	NF_5mC_peak_56	PF3D7_0104300	UBP1	ubiquitin carboxyl-terminal hydrolase 1, putative
Pf3D7_01_v3	203079	203467	389	203242	88	4.23935	1.53065	3.40295	NF_5mC_peak_57	PF3D7_0104400	LytB	4-hydroxy-3-methylbut-2-enyl diphosphate reductase
Pf3D7_01_v3	204944	205291	348	205158	120	13.561	2.13211	12.4587	NF_5mC_peak_58	PF3D7_0104500		conserved protein, unknown function
Pf3D7_01_v3	206213	206539	327	206386	140	22.3316	2.56864	21.0495	NF_5mC_peak_59	PF3D7_0104600		conserved Plasmodium protein, unknown function
Pf3D7_01_v3	209120	209573	454	209397	100	8.23145	1.84494	7.26227	NF_5mC_peak_60	PF3D7_0104600		conserved Plasmodium protein, unknown function
Pf3D7_01_v3	212161	212513	353	212341	176	42.6086	3.4222	40.9621	NF_5mC_peak_61	PF3D7_0104700	MFR2	major facilitator superfamily-related transporter, putative
Pf3D7_01_v3	217756	218046	291	217892	123	21.8681	2.72151	20.595	NF_5mC_peak_62	intergenic
Pf3D7_01_v3	223500	223928	429	223711	153	32.0857	3.06486	30.6262	NF_5mC_peak_63	PF3D7_0105200		heptatricopeptide repeat and RAP domain-containing protein, putative
Pf3D7_01_v3	229026	229389	364	229169	132	19.9685	2.48539	18.7317	NF_5mC_peak_64	PF3D7_0105500		conserved protein, unknown function
Pf3D7_01_v3	230284	230722	439	230522	213	63.7992	4.10706	61.7183	NF_5mC_peak_65	PF3D7_0105600		FtsJ-like methyltransferase, putative
Pf3D7_01_v3	233737	234006	270	233892	98	8.15663	1.8505	7.18934	NF_5mC_peak_66	PF3D7_0105600		FtsJ-like methyltransferase, putative
Pf3D7_01_v3	239306	239792	487	239484	135	24.2797	2.75472	22.9611	NF_5mC_peak_67	PF3D7_0105700		asparagine-rich antigen Pfa35-2
Pf3D7_01_v3	240539	240982	444	240782	154	28.5149	2.82368	27.1182	NF_5mC_peak_68	PF3D7_0105700		asparagine-rich antigen Pfa35-2
Pf3D7_01_v3	241331	241583	253	241453	129	21.9567	2.65729	20.682	NF_5mC_peak_69	PF3D7_0105700		asparagine-rich antigen Pfa35-2
Pf3D7_01_v3	242973	243966	994	243602	195	52.3411	3.72836	50.5125	NF_5mC_peak_70	PF3D7_0105700		asparagine-rich antigen Pfa35-2
Pf3D7_01_v3	244265	244814	550	244643	137	20.1501	2.45173	18.91	NF_5mC_peak_71	PF3D7_0105700		asparagine-rich antigen Pfa35-2
Pf3D7_01_v3	245374	245951	578	245766	165	34.0966	3.04473	32.6024	NF_5mC_peak_72	PF3D7_0105700		asparagine-rich antigen Pfa35-2
Pf3D7_01_v3	246514	247458	945	247199	211	65.1644	4.21916	63.0503	NF_5mC_peak_73	PF3D7_0105700		asparagine-rich antigen Pfa35-2
Pf3D7_01_v3	249688	250390	703	249877	158	34.161	3.13538	32.6655	NF_5mC_peak_74	PF3D7_0105800		cyclin-dependent kinases regulatory subunit, putative
Pf3D7_01_v3	254325	254690	366	254506	169	27.32	2.6108	25.9446	NF_5mC_peak_75	PF3D7_0105900		3'-5' exonuclease, putative
Pf3D7_01_v3	257370	257851	482	257540	158	30.7815	2.92127	29.3444	NF_5mC_peak_76	PF3D7_0106000		conserved protein, unknown function
Pf3D7_01_v3	266267	266867	601	266689	110	13.2149	2.18395	12.1204	NF_5mC_peak_77	PF3D7_0106300	ATP6	calcium-transporting ATPase
Pf3D7_01_v3	267596	268020	425	267782	124	14.21	2.14979	13.093	NF_5mC_peak_78	PF3D7_0106300	ATP6	calcium-transporting ATPase
Pf3D7_01_v3	268672	269227	556	269042	141	26.7027	2.85241	25.3384	NF_5mC_peak_79	PF3D7_0106300	ATP6	calcium-transporting ATPase
Pf3D7_01_v3	273251	273528	278	273410	133	25.683	2.87985	24.3382	NF_5mC_peak_80	PF3D7_0106400		pre-rRNA-processing protein TSR2, putative
Pf3D7_01_v3	274339	274639	301	274553	93	8.02047	1.87007	7.05654	NF_5mC_peak_81	PF3D7_0106500		conserved Plasmodium protein, unknown function
Pf3D7_01_v3	276180	276890	711	276360	117	9.49466	1.85184	8.49102	NF_5mC_peak_82	PF3D7_0106500		conserved Plasmodium protein, unknown function
Pf3D7_01_v3	279165	279940	776	279488	294	103.634	4.84141	100.391	NF_5mC_peak_83	PF3D7_0106600		conserved Plasmodium protein, unknown function
Pf3D7_01_v3	281142	281473	332	281297	127	21.9063	2.67644	20.6325	NF_5mC_peak_84	PF3D7_0106700	AARP2	small ribosomal subunit assembling AARP2 protein
Pf3D7_01_v3	282256	284459	2204	282446	202	61.0462	4.13056	59.0305	NF_5mC_peak_85	PF3D7_0106700	AARP2	small ribosomal subunit assembling AARP2 protein
Pf3D7_01_v3	285039	285472	434	285251	200	57.6791	3.96359	55.7402	NF_5mC_peak_86	PF3D7_0106700	AARP2	small ribosomal subunit assembling AARP2 protein
Pf3D7_01_v3	290531	290971	441	290800	144	22.3803	2.53426	21.0974	NF_5mC_peak_87	PF3D7_0106900	IspD	2-C-methyl-D-erythritol 4-phosphate cytidylyltransferase, putative
Pf3D7_01_v3	291320	292294	975	291545	240	69.0933	3.98557	66.8832	NF_5mC_peak_88	PF3D7_0106900	IspD	2-C-methyl-D-erythritol 4-phosphate cytidylyltransferase, putative
Pf3D7_01_v3	295799	296061	263	295926	108	10.9657	2.01987	9.92367	NF_5mC_peak_89	PF3D7_0107100		conserved protein, unknown function
Pf3D7_01_v3	299590	299905	316	299800	120	13.561	2.13211	12.4587	NF_5mC_peak_90	PF3D7_0107300		conserved Plasmodium protein, unknown function
Pf3D7_01_v3	300596	300966	371	300693	99	9.62318	1.97194	8.61556	NF_5mC_peak_91	PF3D7_0107300		conserved Plasmodium protein, unknown function
Pf3D7_01_v3	306371	307118	748	306807	203	52.5024	3.6243	50.6705	NF_5mC_peak_92	PF3D7_0107500	NCR1	Niemann-Pick type C1-related protein
Pf3D7_01_v3	308058	308888	831	308664	234	67.2891	3.97804	65.1247	NF_5mC_peak_93	PF3D7_0107500	NCR1	Niemann-Pick type C1-related protein
Pf3D7_01_v3	314565	315450	886	314754	167	43.0071	3.58159	41.3539	NF_5mC_peak_94	PF3D7_0107600	eIK2	eukaryotic translation initiation factor 2-alpha kinase 2, putative
Pf3D7_01_v3	315892	316246	355	316065	120	14.8767	2.22851	13.7448	NF_5mC_peak_95	PF3D7_0107600	eIK2	eukaryotic translation initiation factor 2-alpha kinase 2, putative
Pf3D7_01_v3	316295	316739	445	316531	90	7.88093	1.87729	6.92159	NF_5mC_peak_96	PF3D7_0107600	eIK2	eukaryotic translation initiation factor 2-alpha kinase 2, putative
Pf3D7_01_v3	322431	322709	279	322542	100	11.2775	2.1075	10.228	NF_5mC_peak_97	PF3D7_0107800	MRE11	double-strand break repair protein MRE11
Pf3D7_01_v3	323133	323423	291	323262	123	13.1661	2.08267	12.0726	NF_5mC_peak_98	PF3D7_0107800	MRE11	double-strand break repair protein MRE11
Pf3D7_01_v3	323964	324241	278	324128	91	4.74001	1.56971	3.88427	NF_5mC_peak_99	PF3D7_0107800	MRE11	double-strand break repair protein MRE11
Pf3D7_01_v3	326045	326401	357	326207	98	11.4062	2.13607	10.3539	NF_5mC_peak_100	PF3D7_0107800	MRE11	double-strand break repair protein MRE11
Pf3D7_01_v3	337791	338767	977	338500	224	75.0558	4.56225	72.6874	NF_5mC_peak_101	PF3D7_0108300	ARP	conserved Plasmodium protein, unknown function
Pf3D7_01_v3	340842	341254	413	340993	105	9.97834	1.96033	8.96146	NF_5mC_peak_102	PF3D7_0108300	ARP	conserved Plasmodium protein, unknown function
Pf3D7_01_v3	341481	342158	678	341699	118	14.3457	2.20532	13.2259	NF_5mC_peak_103	PF3D7_0108300	ARP	conserved Plasmodium protein, unknown function
Pf3D7_01_v3	349150	349811	662	349374	159	40.2328	3.52407	38.6293	NF_5mC_peak_104	PF3D7_0108500		ELM2 domain-containing protein, putative
Pf3D7_01_v3	350894	351137	244	351051	84	7.39397	1.87216	6.44836	NF_5mC_peak_105	PF3D7_0108600		DnaJ domain-containing protein, putative
Pf3D7_01_v3	353268	353616	349	353417	94	5.00167	1.58324	4.13524	NF_5mC_peak_106	PF3D7_0108700	PSOP24	secreted ookinete protein, putative
Pf3D7_01_v3	354846	356181	1336	355421	237	73.0036	4.22835	70.688	NF_5mC_peak_107	PF3D7_0108700	PSOP24	secreted ookinete protein, putative
Pf3D7_01_v3	361412	361926	515	361599	95	8.41847	1.89306	7.44364	NF_5mC_peak_108	intergenic
Pf3D7_01_v3	364694	364998	305	364851	123	21.9939	2.73115	20.7178	NF_5mC_peak_109	PF3D7_0109000	PHIL1	photosensitized INA-labeled protein PHIL1
Pf3D7_01_v3	365976	366264	289	366154	90	5.74431	1.67254	4.85273	NF_5mC_peak_110	PF3D7_0109100	CCp5	LCCL domain-containing protein
Pf3D7_01_v3	376458	376710	253	376585	80	6.27517	1.78406	5.36487	NF_5mC_peak_111	PF3D7_0109500		N-acetyltransferase, GNAT family, putative
Pf3D7_01_v3	378982	379585	604	379361	230	79.1075	4.68391	76.6278	NF_5mC_peak_112	PF3D7_0109700	RRP36	rRNA biogenesis protein RRP36, putative
Pf3D7_01_v3	380682	381045	364	380866	120	15.5956	2.28153	14.4486	NF_5mC_peak_113	PF3D7_0109800	cPheRS	phenylalanine--tRNA ligase alpha subunit
Pf3D7_01_v3	388413	388829	417	388618	119	17.1972	2.41049	16.0167	NF_5mC_peak_114	PF3D7_0110000		conserved Plasmodium protein, unknown function
Pf3D7_01_v3	390084	390335	252	390235	112	13.9917	2.22829	12.8798	NF_5mC_peak_115	PF3D7_0110100	SELB	selenocysteine-specific elongation factor, putative
Pf3D7_01_v3	393882	394258	377	394107	178	42.282	3.37516	40.6418	NF_5mC_peak_116	PF3D7_0110400	RPB9	DNA-directed RNA polymerase II subunit RPB9, putative
Pf3D7_01_v3	396609	397563	955	396967	211	66.5171	4.29865	64.3717	NF_5mC_peak_117	PF3D7_0110500	BDP3	bromodomain protein 3, putative
Pf3D7_01_v3	397671	398755	1085	398276	219	65.9006	4.12845	63.7702	NF_5mC_peak_118	PF3D7_0110500	BDP3	bromodomain protein 3, putative
Pf3D7_01_v3	399153	399536	384	399349	186	43.6314	3.34993	41.9669	NF_5mC_peak_119	PF3D7_0110500	BDP3	bromodomain protein 3, putative
Pf3D7_01_v3	401111	401780	670	401584	130	17.2724	2.31712	16.0897	NF_5mC_peak_120	PF3D7_0110500	BDP3	bromodomain protein 3, putative
Pf3D7_01_v3	402065	402612	548	402506	99	7.38014	1.77662	6.43575	NF_5mC_peak_121	PF3D7_0110500	BDP3	bromodomain protein 3, putative
Pf3D7_01_v3	406724	407128	405	406917	69	3.27675	1.4959	2.48164	NF_5mC_peak_122	PF3D7_0110600	PIP5K	phosphatidylinositol-4-phosphate 5-kinase
Pf3D7_01_v3	408143	408780	638	408379	205	60.7483	4.06219	58.737	NF_5mC_peak_123	PF3D7_0110600	PIP5K	phosphatidylinositol-4-phosphate 5-kinase
Pf3D7_01_v3	412362	412696	335	412534	103	13.7298	2.29065	12.6235	NF_5mC_peak_124	PF3D7_0110600	PIP5K	phosphatidylinositol-4-phosphate 5-kinase
Pf3D7_01_v3	413564	413805	242	413631	92	9.86414	2.04837	8.84981	NF_5mC_peak_125	PF3D7_0110700	CAF1C	chromatin assembly factor 1 subunit C, putative
Pf3D7_01_v3	418343	418711	369	418514	153	33.4062	3.1523	31.9237	NF_5mC_peak_126	PF3D7_0110800		transcription initiation factor TFIIB, putative
Pf3D7_01_v3	420487	420751	265	420657	81	4.00317	1.53273	3.17641	NF_5mC_peak_127	PF3D7_0110900	AKLP1	adenylate kinase-like protein 1
Pf3D7_01_v3	422343	422799	457	422621	153	35.117	3.26752	33.6048	NF_5mC_peak_128	PF3D7_0111000		kinesin-8B, putative
Pf3D7_01_v3	423909	424251	343	424085	126	17.1024	2.33901	15.9237	NF_5mC_peak_129	PF3D7_0111000		kinesin-8B, putative
Pf3D7_01_v3	424515	425346	832	424788	131	19.7866	2.48229	18.5538	NF_5mC_peak_130	PF3D7_0111000		kinesin-8B, putative
Pf3D7_01_v3	425492	425890	399	425681	140	25.3005	2.7681	23.962	NF_5mC_peak_131	PF3D7_0111000		kinesin-8B, putative
Pf3D7_01_v3	427201	427568	368	427384	138	29.1125	3.06154	27.7045	NF_5mC_peak_132	PF3D7_0111000		kinesin-8B, putative
Pf3D7_01_v3	431634	431972	339	431804	109	12.6787	2.14944	11.596	NF_5mC_peak_133	PF3D7_0111300		P-loop containing nucleoside triphosphate hydrolase, putative
Pf3D7_01_v3	434003	434658	656	434327	274	96.8988	4.8457	93.884	NF_5mC_peak_134	PF3D7_0111300		P-loop containing nucleoside triphosphate hydrolase, putative
Pf3D7_01_v3	436125	436386	262	436191	92	9.11813	1.97889	8.1243	NF_5mC_peak_135	PF3D7_0111300		P-loop containing nucleoside triphosphate hydrolase, putative
Pf3D7_01_v3	436437	436807	371	436642	98	6.33505	1.68914	5.4229	NF_5mC_peak_136	PF3D7_0111300		P-loop containing nucleoside triphosphate hydrolase, putative
Pf3D7_01_v3	437236	437948	713	437468	191	50.0318	3.65227	48.2482	NF_5mC_peak_137	PF3D7_0111400	GEXP19	conserved Plasmodium protein, unknown function
Pf3D7_01_v3	439820	440486	667	440287	128	19.2838	2.47575	18.0608	NF_5mC_peak_138	PF3D7_0111500		UMP-CMP kinase, putative
Pf3D7_01_v3	440656	441040	385	440835	110	16.4504	2.44482	15.2846	NF_5mC_peak_139	PF3D7_0111500		UMP-CMP kinase, putative
Pf3D7_01_v3	445994	446775	782	446322	291	117.819	5.59719	114.046	NF_5mC_peak_140	PF3D7_0111800		eukaryotic translation initiation factor 4E, putative
Pf3D7_01_v3	448211	448451	241	448333	117	13.7407	2.16799	12.6339	NF_5mC_peak_141	PF3D7_0111800		eukaryotic translation initiation factor 4E, putative
Pf3D7_01_v3	452146	452388	243	452272	99	5.18316	1.58089	4.31097	NF_5mC_peak_142	PF3D7_0112000	TatD	TatD-like deoxyribonuclease
Pf3D7_01_v3	452874	453156	283	453017	139	24.3328	2.71328	23.0124	NF_5mC_peak_143	PF3D7_0112000	TatD	TatD-like deoxyribonuclease
Pf3D7_01_v3	487606	489740	2135	488734	299	108.753	4.99971	105.34	NF_5mC_peak_144	PF3D7_0112900		Plasmodium exported protein, unknown function
Pf3D7_01_v3	493380	493854	475	493597	251	87.4403	4.75895	84.7149	NF_5mC_peak_145	intergenic
Pf3D7_01_v3	495157	495656	500	495341	121	20.038	2.60527	18.8002	NF_5mC_peak_146	PF3D7_0113100	SURF1.1	surface-associated interspersed protein 1.1 (SURFIN 1.1)
Pf3D7_01_v3	496367	500348	3982	497261	238	86.0781	4.93047	83.3915	NF_5mC_peak_147	PF3D7_0113100	SURF1.1	surface-associated interspersed protein 1.1 (SURFIN 1.1)
Pf3D7_01_v3	501428	502425	998	502112	197	55.2828	3.87011	53.3963	NF_5mC_peak_148	PF3D7_0113200		Plasmodium exported protein, unknown function
Pf3D7_01_v3	502777	503146	370	502966	136	27.1762	2.94886	25.8033	NF_5mC_peak_149	PF3D7_0113200		Plasmodium exported protein, unknown function
Pf3D7_01_v3	508648	509136	489	508921	229	80.1982	4.76682	77.6871	NF_5mC_peak_150	PF3D7_0113400		Plasmodium exported protein, unknown function
Pf3D7_01_v3	512358	513665	1308	513456	182	43.4499	3.39116	41.7884	NF_5mC_peak_151	intergenic
Pf3D7_01_v3	513888	514301	414	514083	175	43.4131	3.48587	41.7521	NF_5mC_peak_152	intergenic
Pf3D7_01_v3	514770	517820	3051	516578	221	64.9348	4.04424	62.8264	NF_5mC_peak_153	intergenic
Pf3D7_01_v3	518112	518400	289	518261	145	25.9654	2.75717	24.6153	NF_5mC_peak_154	intergenic
Pf3D7_01_v3	520242	520594	353	520449	173	46.9067	3.7395	45.1826	NF_5mC_peak_155	PF3D7_0113700	HSP40	heat shock protein 40, type II
Pf3D7_01_v3	521661	522218	558	521946	160	35.289	3.18172	33.7741	NF_5mC_peak_156	PF3D7_0113700	HSP40	heat shock protein 40, type II
Pf3D7_01_v3	527428	527956	529	527743	130	16.9417	2.2944	15.766	NF_5mC_peak_157	PF3D7_0113800		DBL containing protein, unknown function
Pf3D7_01_v3	529117	530116	1000	529448	191	44.9691	3.36278	43.2798	NF_5mC_peak_158	PF3D7_0113800		DBL containing protein, unknown function
Pf3D7_01_v3	530435	531059	625	530731	209	57.7267	3.82819	55.7857	NF_5mC_peak_159	PF3D7_0113800		DBL containing protein, unknown function
Pf3D7_01_v3	531953	534195	2243	533210	224	66.9985	4.11002	64.84	NF_5mC_peak_160	PF3D7_0113800		DBL containing protein, unknown function
Pf3D7_01_v3	534980	536467	1488	535352	255	87.7593	4.70516	85.0249	NF_5mC_peak_161	PF3D7_0113800		DBL containing protein, unknown function
Pf3D7_01_v3	537970	538348	379	538152	184	53.4815	3.97591	51.6309	NF_5mC_peak_162	PF3D7_0113900	CBP1	CX3CL1-binding protein 1
Pf3D7_01_v3	538528	538777	250	538612	107	14.9099	2.34956	13.7773	NF_5mC_peak_163	intergenic
Pf3D7_01_v3	542852	546022	3171	543391	265	101.35	5.24535	98.1894	NF_5mC_peak_164	PF3D7_0114000	EPF1	exported protein family 1
Pf3D7_01_v3	546178	546551	374	546372	135	24.6921	2.78385	23.3656	NF_5mC_peak_165	PF3D7_0114000	EPF1	exported protein family 1
Pf3D7_01_v3	550834	551534	701	551331	220	78.8138	4.86762	76.342	NF_5mC_peak_166	PF3D7_0114200	EPF3	exported protein family 3
Pf3D7_01_v3	553014	553598	585	553281	206	52.0481	3.56006	50.2246	NF_5mC_peak_167	intergenic
Pf3D7_01_v3	554379	554645	267	554567	95	9.59062	1.99891	8.58387	NF_5mC_peak_168	intergenic
Pf3D7_01_v3	561040	561336	297	561209	111	11.0562	2.00637	10.0123	NF_5mC_peak_169	intergenic
Pf3D7_01_v3	564069	564513	445	564299	158	31.5931	2.97201	30.1422	NF_5mC_peak_170	PF3D7_0114700	RIF	rifin
Pf3D7_01_v3	579104	580580	1477	579888	183	54.3904	4.05268	52.5206	NF_5mC_peak_171	PF3D7_0115000	SURF1.3	surface-associated interspersed protein 1.3 (SURFIN 1.3)
Pf3D7_01_v3	581058	581425	368	581252	168	45.3716	3.7223	43.6748	NF_5mC_peak_172	PF3D7_0115000	SURF1.3	surface-associated interspersed protein 1.3 (SURFIN 1.3)
Pf3D7_01_v3	581919	582377	459	582109	153	36.9273	3.39192	35.3827	NF_5mC_peak_173	PF3D7_0115000	SURF1.3	surface-associated interspersed protein 1.3 (SURFIN 1.3)
Pf3D7_01_v3	582493	582867	375	582678	153	36.9273	3.39192	35.3827	NF_5mC_peak_174	PF3D7_0115000	SURF1.3	surface-associated interspersed protein 1.3 (SURFIN 1.3)
Pf3D7_01_v3	595410	595872	463	595624	242	79.7297	4.50302	77.2314	NF_5mC_peak_175	PF3D7_0115300	RIF	rifin
Pf3D7_01_v3	598708	599194	487	598874	109	9.44105	1.89182	8.43835	NF_5mC_peak_176	PF3D7_0115400		stevor
Pf3D7_01_v3	607250	607559	310	607373	95	10.8665	2.11444	9.82671	NF_5mC_peak_177	PF3D7_0115700	VAR	erythrocyte membrane protein 1, PfEMP1
Pf3D7_01_v3	608619	615073	6455	612374	200	60.8917	4.15614	58.8776	NF_5mC_peak_178	PF3D7_0115700	VAR	erythrocyte membrane protein 1, PfEMP1
Pf3D7_01_v3	616417	616678	262	616575	100	12.5095	2.21454	11.4312	NF_5mC_peak_179	intergenic
Pf3D7_01_v3	620578	620856	279	620723	93	10.1938	2.07039	9.17117	NF_5mC_peak_180	intergenic
Pf3D7_01_v3	625260	625506	247	625374	108	15.6534	2.40077	14.5045	NF_5mC_peak_181	intergenic
Pf3D7_01_v3	627341	627624	284	627480	93	9.43331	2.00022	8.43083	NF_5mC_peak_182	intergenic
Pf3D7_01_v3	627739	628105	367	627935	106	11.4989	2.07778	10.4446	NF_5mC_peak_183	intergenic
Pf3D7_01_v3	628564	629122	559	628954	89	6.70221	1.77077	5.77856	NF_5mC_peak_184	intergenic
Pf3D7_01_v3	629897	630359	463	630126	104	12.0728	2.14137	11.0045	NF_5mC_peak_185	intergenic
Pf3D7_01_v3	637528	638088	561	638011	84	3.90457	1.51012	3.08133	NF_5mC_peak_186	intergenic
Pf3D7_01_v3	639881	640642	762	640237	223	72.9354	4.45798	70.6218	NF_5mC_peak_187	intergenic
Pf3D7_02_v3	1000	6371	5372	1806	287	118.719	5.72957	114.914	NF_5mC_peak_188	intergenic
Pf3D7_02_v3	7140	7483	344	7291	86	5.96755	1.71558	5.06821	NF_5mC_peak_189	intergenic
Pf3D7_02_v3	9387	9658	272	9438	76	3.13976	1.45106	2.35145	NF_5mC_peak_190	intergenic
Pf3D7_02_v3	10014	12297	2284	10522	218	71.737	4.47959	69.4557	NF_5mC_peak_191	intergenic
Pf3D7_02_v3	16608	17085	478	16871	132	16.2779	2.23383	15.1161	NF_5mC_peak_192	intergenic
Pf3D7_02_v3	23266	23718	453	23500	121	19.6347	2.57449	18.4049	NF_5mC_peak_193	intergenic
Pf3D7_02_v3	25690	28131	2442	26484	163	35.8131	3.17578	34.2886	NF_5mC_peak_194	PF3D7_0200100	VAR	erythrocyte membrane protein 1, PfEMP1
Pf3D7_02_v3	28271	28734	464	28504	165	39.7253	3.39793	38.1309	NF_5mC_peak_195	PF3D7_0200100	VAR	erythrocyte membrane protein 1, PfEMP1
Pf3D7_02_v3	29258	29783	526	29471	170	46.542	3.76635	44.8241	NF_5mC_peak_196	PF3D7_0200100	VAR	erythrocyte membrane protein 1, PfEMP1
Pf3D7_02_v3	30515	30771	257	30682	98	6.79604	1.73029	5.86967	NF_5mC_peak_197	PF3D7_0200100	VAR	erythrocyte membrane protein 1, PfEMP1
Pf3D7_02_v3	33300	33770	471	33523	153	33.8588	3.18257	32.368	NF_5mC_peak_198	PF3D7_0200200	RIF	rifin
Pf3D7_02_v3	38724	38982	259	38854	100	6.52207	1.69637	5.60443	NF_5mC_peak_199	PF3D7_0200400		stevor
Pf3D7_02_v3	42049	42290	242	42234	78	4.1566	1.56295	3.32323	NF_5mC_peak_200	PF3D7_0200500	RIF	rifin
Pf3D7_02_v3	45816	46066	251	45949	100	7.84549	1.81159	6.88704	NF_5mC_peak_201	PF3D7_0200600	RIF	rifin
Pf3D7_02_v3	49024	49496	473	49251	77	4.02492	1.55233	3.19731	NF_5mC_peak_202	PF3D7_0200700	RIF	rifin
Pf3D7_02_v3	54639	55043	405	54858	137	22.0542	2.57948	20.7769	NF_5mC_peak_203	intergenic
Pf3D7_02_v3	57711	58082	372	57935	111	15.3211	2.34298	14.1795	NF_5mC_peak_204	PF3D7_0201000	RIF	rifin
Pf3D7_02_v3	63561	63982	422	63729	128	20.2026	2.54146	18.9617	NF_5mC_peak_205	PF3D7_0201200	RIF	rifin
Pf3D7_02_v3	66768	67069	302	66922	118	15.3944	2.28383	14.2513	NF_5mC_peak_206	PF3D7_0201300		stevor
Pf3D7_02_v3	73470	73895	426	73684	198	54.0962	3.78543	52.2331	NF_5mC_peak_207	PF3D7_0201500		Plasmodium exported protein (hyp9), unknown function
Pf3D7_02_v3	77199	77916	718	77554	215	61.8833	3.96852	59.8483	NF_5mC_peak_208	PF3D7_0201600	RLP1	PHISTb domain-containing RESA-like protein 1
Pf3D7_02_v3	81185	81867	683	81372	163	32.7799	2.98763	31.3078	NF_5mC_peak_209	PF3D7_0201700		DnaJ protein, putative
Pf3D7_02_v3	82522	83087	566	82796	174	37.4481	3.1389	35.8947	NF_5mC_peak_210	PF3D7_0201700		DnaJ protein, putative
Pf3D7_02_v3	87847	88160	314	88027	113	17.6746	2.5109	16.4838	NF_5mC_peak_211	PF3D7_0201800	KAHsp40	knob associated heat shock protein 40
Pf3D7_02_v3	93711	94312	602	94103	100	12.6244	2.22457	11.5428	NF_5mC_peak_212	PF3D7_0201900	EMP3	erythrocyte membrane protein 3
Pf3D7_02_v3	94694	95356	663	94932	132	26.1773	2.92938	24.8226	NF_5mC_peak_213	PF3D7_0201900	EMP3	erythrocyte membrane protein 3
Pf3D7_02_v3	96913	98504	1592	98142	280	105.282	5.16275	101.977	NF_5mC_peak_214	PF3D7_0201900	EMP3	erythrocyte membrane protein 3
Pf3D7_02_v3	103741	104407	667	104031	277	105.711	5.24186	102.394	NF_5mC_peak_215	PF3D7_0202000	KAHRP	knob-associated histidine-rich protein
Pf3D7_02_v3	104518	105407	890	105131	167	44.7902	3.70027	43.1039	NF_5mC_peak_216	PF3D7_0202000	KAHRP	knob-associated histidine-rich protein
Pf3D7_02_v3	120646	123108	2463	121869	295	122.95	5.78394	118.991	NF_5mC_peak_217	PF3D7_0202400	PTEF	translation-enhancing factor
Pf3D7_02_v3	130146	132241	2096	131826	233	74.5302	4.3739	72.1759	NF_5mC_peak_218	PF3D7_0202600		nucleic acid-binding protein, putative
Pf3D7_02_v3	133250	133637	388	133449	172	31.1214	2.79655	29.6788	NF_5mC_peak_219	PF3D7_0202600		nucleic acid-binding protein, putative
Pf3D7_02_v3	142735	143224	490	142864	124	13.4985	2.09947	12.3973	NF_5mC_peak_220	PF3D7_0203000	ROPE	repetitive organellar protein, putative
Pf3D7_02_v3	143491	145791	2301	145460	244	76.2996	4.29105	73.8979	NF_5mC_peak_221	PF3D7_0203000	ROPE	repetitive organellar protein, putative
Pf3D7_02_v3	145898	147627	1730	146581	234	68.4391	4.03674	66.2462	NF_5mC_peak_222	PF3D7_0203000	ROPE	repetitive organellar protein, putative
Pf3D7_02_v3	150625	151395	771	151076	222	65.2971	4.04864	63.1802	NF_5mC_peak_223	PF3D7_0203100		protein kinase, putative
Pf3D7_02_v3	151664	152544	881	151976	188	50.6007	3.73094	48.8062	NF_5mC_peak_224	PF3D7_0203100		protein kinase, putative
Pf3D7_02_v3	153439	154397	959	153751	227	68.668	4.15354	66.4671	NF_5mC_peak_225	PF3D7_0203100		protein kinase, putative
Pf3D7_02_v3	156371	156960	590	156632	219	63.0863	3.97416	61.0241	NF_5mC_peak_226	PF3D7_0203100		protein kinase, putative
Pf3D7_02_v3	158891	159592	702	158967	102	8.19213	1.82992	7.22393	NF_5mC_peak_227	PF3D7_0203200		conserved Plasmodium protein, unknown function
Pf3D7_02_v3	165528	166021	494	165835	119	20.2232	2.64305	18.9814	NF_5mC_peak_228	PF3D7_0203600		conserved Plasmodium protein, unknown function
Pf3D7_02_v3	166211	166518	308	166349	127	20.1416	2.54742	18.9018	NF_5mC_peak_229	PF3D7_0203600		conserved Plasmodium protein, unknown function
Pf3D7_02_v3	166723	167087	365	166885	134	19.1588	2.41175	17.9383	NF_5mC_peak_230	PF3D7_0203600		conserved Plasmodium protein, unknown function
Pf3D7_02_v3	168701	169324	624	169035	210	67.9548	4.4028	65.7726	NF_5mC_peak_231	PF3D7_0203700	MAK16	protein MAK16, putative
Pf3D7_02_v3	169377	170142	766	169622	196	50.6966	3.61944	48.9001	NF_5mC_peak_232	PF3D7_0203700	MAK16	protein MAK16, putative
Pf3D7_02_v3	172212	172501	290	172400	76	5.2383	1.69596	4.36341	NF_5mC_peak_233	PF3D7_0203800		conserved Plasmodium protein, unknown function
Pf3D7_02_v3	181270	181577	308	181399	123	17.0078	2.35876	15.8307	NF_5mC_peak_234	PF3D7_0204000	CAPH2	condensin-2 complex subunit H2, putative
Pf3D7_02_v3	182978	183505	528	183156	158	28.1003	2.75656	26.7111	NF_5mC_peak_235	PF3D7_0204100		Sel1 repeat-containing protein, putative
Pf3D7_02_v3	183991	184342	352	184161	132	21.5894	2.59848	20.3212	NF_5mC_peak_236	PF3D7_0204100		Sel1 repeat-containing protein, putative
Pf3D7_02_v3	184596	185058	463	184875	158	32.4264	3.02454	30.9607	NF_5mC_peak_237	PF3D7_0204100		Sel1 repeat-containing protein, putative
Pf3D7_02_v3	185341	185763	423	185538	180	49.2581	3.77493	47.4896	NF_5mC_peak_238	PF3D7_0204100		Sel1 repeat-containing protein, putative
Pf3D7_02_v3	187260	187744	485	187532	159	37.4901	3.3393	35.9353	NF_5mC_peak_239	PF3D7_0204100		Sel1 repeat-containing protein, putative
Pf3D7_02_v3	188559	189262	704	188830	201	59.543	4.05766	57.5592	NF_5mC_peak_240	PF3D7_0204100		Sel1 repeat-containing protein, putative
Pf3D7_02_v3	192167	192516	350	192327	157	39.12	3.48002	37.5364	NF_5mC_peak_241	intergenic
Pf3D7_02_v3	195153	196354	1202	195653	204	51.457	3.55406	49.6451	NF_5mC_peak_242	PF3D7_0204300		conserved Plasmodium protein, unknown function
Pf3D7_02_v3	201283	201647	365	201465	119	13.9136	2.16544	12.8033	NF_5mC_peak_243	PF3D7_0204600		5'-3' exonuclease, putative
Pf3D7_02_v3	202857	203289	433	203141	117	15.0247	2.26464	13.8897	NF_5mC_peak_244	PF3D7_0204600		5'-3' exonuclease, putative
Pf3D7_02_v3	203606	203940	335	203796	134	18.6703	2.3788	17.4593	NF_5mC_peak_245	PF3D7_0204600		5'-3' exonuclease, putative
Pf3D7_02_v3	206801	207458	658	207285	143	31.6436	3.17166	30.1912	NF_5mC_peak_246	PF3D7_0204700	HT1	hexose transporter
Pf3D7_02_v3	209824	210086	263	209935	98	5.89885	1.6499	5.00168	NF_5mC_peak_247	PF3D7_0204800		3'-5' exonuclease, putative
Pf3D7_02_v3	210445	210891	447	210631	153	28.0546	2.80546	26.6663	NF_5mC_peak_248	PF3D7_0204800		3'-5' exonuclease, putative
Pf3D7_02_v3	212006	212363	358	212190	154	32.5849	3.08476	31.1167	NF_5mC_peak_249	PF3D7_0204900	COQ5	2-methoxy-6-polyprenyl-1,4-benzoquinol methylase, mitochondrial, putative
Pf3D7_02_v3	213026	214347	1322	213368	242	88.2301	4.97408	85.4819	NF_5mC_peak_250	PF3D7_0205000		conserved Plasmodium protein, unknown function
Pf3D7_02_v3	214836	215988	1153	215342	251	101.365	5.55041	98.2009	NF_5mC_peak_251	PF3D7_0205100		conserved Plasmodium protein, unknown function
Pf3D7_02_v3	218376	218857	482	218706	127	23.8198	2.81926	22.5091	NF_5mC_peak_252	PF3D7_0205200		MORN repeat protein, putative
Pf3D7_02_v3	220611	220936	326	220794	95	10.3012	2.06317	9.2762	NF_5mC_peak_253	PF3D7_0205300		conserved Plasmodium protein, unknown function
Pf3D7_02_v3	223349	223690	342	223500	127	19.3596	2.49099	18.1346	NF_5mC_peak_254	PF3D7_0205400		PCI domain-containing protein, putative
Pf3D7_02_v3	229618	229980	363	229783	160	37.3218	3.31371	35.7705	NF_5mC_peak_255	PF3D7_0205600		conserved Plasmodium protein, unknown function
Pf3D7_02_v3	235512	235865	354	235668	126	18.6565	2.45017	17.4459	NF_5mC_peak_256	PF3D7_0205900	RPN1	26S proteasome regulatory subunit RPN1, putative
Pf3D7_02_v3	240157	241364	1208	240622	172	38.1637	3.20585	36.5973	NF_5mC_peak_257	PF3D7_0206000	RAD2	DNA repair protein RAD2, putative
Pf3D7_02_v3	242159	243396	1238	242813	146	22.8296	2.54469	21.5382	NF_5mC_peak_258	PF3D7_0206000	RAD2	DNA repair protein RAD2, putative
Pf3D7_02_v3	249441	249839	399	249677	142	25.4067	2.75291	24.0665	NF_5mC_peak_259	PF3D7_0206200	PAT	pantothenate transporter
Pf3D7_02_v3	252794	253154	361	252934	105	11.1693	2.05836	10.123	NF_5mC_peak_260	intergenic
Pf3D7_02_v3	254436	255064	629	254819	109	14.2395	2.27503	13.1221	NF_5mC_peak_261	intergenic
Pf3D7_02_v3	255450	255818	369	255616	150	22.6313	2.49718	21.3434	NF_5mC_peak_262	intergenic
Pf3D7_02_v3	255994	256291	298	256178	112	11.4067	2.02683	10.3543	NF_5mC_peak_263	intergenic
Pf3D7_02_v3	257329	257718	390	257529	154	28.8217	2.84298	27.4192	NF_5mC_peak_264	intergenic
Pf3D7_02_v3	259067	260271	1205	259716	190	50.6058	3.70089	48.8111	NF_5mC_peak_265	intergenic
Pf3D7_02_v3	261295	261634	340	261448	141	25.756	2.78774	24.4091	NF_5mC_peak_266	intergenic
Pf3D7_02_v3	264105	264702	598	264569	137	22.3874	2.60208	21.1043	NF_5mC_peak_267	PF3D7_0206500		conserved Plasmodium protein, unknown function
Pf3D7_02_v3	271693	271970	278	271866	130	15.8176	2.21755	14.6655	NF_5mC_peak_268	PF3D7_0206700	ADSL	adenylosuccinate lyase
Pf3D7_02_v3	273865	274221	357	274038	136	27.4931	2.97177	26.1148	NF_5mC_peak_269	PF3D7_0206700	ADSL	adenylosuccinate lyase
Pf3D7_02_v3	277468	278338	871	278118	204	57.4593	3.88781	55.526	NF_5mC_peak_270	PF3D7_0207000	MSP4	merozoite surface protein 4
Pf3D7_02_v3	281461	281705	245	281559	90	7.83995	1.8734	6.88184	NF_5mC_peak_271	PF3D7_0207100		conserved Plasmodium protein, unknown function
Pf3D7_02_v3	281946	282268	323	282059	114	14.4646	2.24779	13.3424	NF_5mC_peak_272	PF3D7_0207100		conserved Plasmodium protein, unknown function
Pf3D7_02_v3	282956	283936	981	283676	216	60.6673	3.88735	58.6618	NF_5mC_peak_273	PF3D7_0207100		conserved Plasmodium protein, unknown function
Pf3D7_02_v3	283996	284646	651	284298	158	30.0355	2.87501	28.6119	NF_5mC_peak_274	PF3D7_0207100		conserved Plasmodium protein, unknown function
Pf3D7_02_v3	284997	285442	446	285230	194	52.9387	3.7784	51.0984	NF_5mC_peak_275	PF3D7_0207100		conserved Plasmodium protein, unknown function
Pf3D7_02_v3	290893	291362	470	290999	102	10.6233	2.03551	9.59028	NF_5mC_peak_276	PF3D7_0207300	SERA8	serine repeat antigen 8
Pf3D7_02_v3	291978	292290	313	292188	98	7.62298	1.80351	6.67122	NF_5mC_peak_277	PF3D7_0207300	SERA8	serine repeat antigen 8
Pf3D7_02_v3	294757	295074	318	294886	133	22.281	2.63648	20.9999	NF_5mC_peak_278	PF3D7_0207400	SERA7	serine repeat antigen 7
Pf3D7_02_v3	295405	296172	768	296043	122	14.006	2.14975	12.8938	NF_5mC_peak_279	PF3D7_0207400	SERA7	serine repeat antigen 7
Pf3D7_02_v3	299402	299684	283	299570	120	11.3418	1.97077	10.2909	NF_5mC_peak_280	PF3D7_0207500	SERA6	serine repeat antigen 6
Pf3D7_02_v3	299940	300526	587	300352	111	9.26562	1.86656	8.26725	NF_5mC_peak_281	PF3D7_0207500	SERA6	serine repeat antigen 6
Pf3D7_02_v3	304092	304522	431	304308	169	34.8799	3.04539	33.3715	NF_5mC_peak_282	PF3D7_0207600	SERA5	serine repeat antigen 5
Pf3D7_02_v3	305037	305346	310	305187	95	6.66831	1.73418	5.74572	NF_5mC_peak_283	PF3D7_0207600	SERA5	serine repeat antigen 5
Pf3D7_02_v3	306697	306943	247	306823	93	8.60722	1.92413	7.6268	NF_5mC_peak_284	PF3D7_0207600	SERA5	serine repeat antigen 5
Pf3D7_02_v3	308974	309458	485	309183	166	34.2493	3.04228	32.7518	NF_5mC_peak_285	PF3D7_0207700	SERA4	serine repeat antigen 4
Pf3D7_02_v3	309536	309839	304	309658	97	8.91552	1.92393	7.92659	NF_5mC_peak_286	PF3D7_0207700	SERA4	serine repeat antigen 4
Pf3D7_02_v3	314971	315286	316	315143	102	10.7302	2.04456	9.69479	NF_5mC_peak_287	PF3D7_0207800	SERA3	serine repeat antigen 3
Pf3D7_02_v3	317806	318312	507	318096	111	15.0495	2.32123	13.9142	NF_5mC_peak_288	PF3D7_0207900	SERA2	serine repeat antigen 2
Pf3D7_02_v3	320491	320997	507	320645	157	32.1974	3.02213	30.7353	NF_5mC_peak_289	PF3D7_0207900	SERA2	serine repeat antigen 2
Pf3D7_02_v3	323038	323305	268	323160	116	13.1137	2.1285	12.0214	NF_5mC_peak_290	PF3D7_0208000	SERA1	serine repeat antigen 1
Pf3D7_02_v3	325239	325492	254	325342	79	6.00814	1.76203	5.10665	NF_5mC_peak_291	PF3D7_0208000	SERA1	serine repeat antigen 1
Pf3D7_02_v3	325629	325937	309	325715	83	7.10677	1.85014	6.17001	NF_5mC_peak_292	PF3D7_0208000	SERA1	serine repeat antigen 1
Pf3D7_02_v3	331662	332401	740	331919	260	97.101	5.1127	94.0806	NF_5mC_peak_293	PF3D7_0208100		conserved Plasmodium protein, unknown function
Pf3D7_02_v3	332746	333094	349	332929	162	31.2571	2.90615	29.8116	NF_5mC_peak_294	PF3D7_0208100		conserved Plasmodium protein, unknown function
Pf3D7_02_v3	333308	334046	739	333827	198	50.5518	3.58377	48.7582	NF_5mC_peak_295	PF3D7_0208100		conserved Plasmodium protein, unknown function
Pf3D7_02_v3	334406	334863	458	334635	282	99.1854	4.82415	96.0922	NF_5mC_peak_296	PF3D7_0208100		conserved Plasmodium protein, unknown function
Pf3D7_02_v3	335640	336068	429	335813	129	16.771	2.2907	15.5991	NF_5mC_peak_297	PF3D7_0208200	KRR1	KRR1 small subunit processome component, putative
Pf3D7_02_v3	343516	343786	271	343658	81	5.09087	1.65157	4.22167	NF_5mC_peak_298	PF3D7_0208400		conserved Plasmodium protein, unknown function
Pf3D7_02_v3	344599	345009	411	344806	187	37.8168	3.01638	36.2569	NF_5mC_peak_299	PF3D7_0208400		conserved Plasmodium protein, unknown function
Pf3D7_02_v3	345323	345773	451	345555	194	52.1117	3.72984	50.2873	NF_5mC_peak_300	PF3D7_0208400		conserved Plasmodium protein, unknown function
Pf3D7_02_v3	347044	347309	266	347128	97	9.86228	2.00778	8.8488	NF_5mC_peak_301	PF3D7_0208400		conserved Plasmodium protein, unknown function
Pf3D7_02_v3	347436	347697	262	347602	80	4.54581	1.59727	3.69681	NF_5mC_peak_302	PF3D7_0208400		conserved Plasmodium protein, unknown function
Pf3D7_02_v3	348735	349422	688	349222	181	39.6017	3.18093	38.0102	NF_5mC_peak_303	PF3D7_0208400		conserved Plasmodium protein, unknown function
Pf3D7_02_v3	349981	350411	431	350203	185	55.6338	4.09673	53.739	NF_5mC_peak_304	PF3D7_0208400		conserved Plasmodium protein, unknown function
Pf3D7_02_v3	354837	355670	834	355432	264	102.323	5.31939	99.128	NF_5mC_peak_305	PF3D7_0208600	RRF1	ribosome-recycling factor
Pf3D7_02_v3	360940	361552	613	361099	131	20.0887	2.50337	18.8498	NF_5mC_peak_306	PF3D7_0208900	P230p	6-cysteine protein P230p
Pf3D7_02_v3	363705	363981	277	363896	107	10.025	1.95095	9.00746	NF_5mC_peak_307	PF3D7_0208900	P230p	6-cysteine protein P230p
Pf3D7_02_v3	366908	367476	569	367019	109	10.921	2.00934	9.88031	NF_5mC_peak_308	PF3D7_0208900	P230p	6-cysteine protein P230p
Pf3D7_02_v3	370140	370609	470	370338	161	33.4824	3.05461	31.9984	NF_5mC_peak_309	PF3D7_0209000	P230	6-cysteine protein P230
Pf3D7_02_v3	370745	372943	2199	371325	230	80.6233	4.77204	78.0992	NF_5mC_peak_310	PF3D7_0209000	P230	6-cysteine protein P230
Pf3D7_02_v3	382507	382951	445	382610	83	7.10677	1.85014	6.17001	NF_5mC_peak_311	PF3D7_0209100	PATPL1	patatin-like phospholipase 1
Pf3D7_02_v3	391562	392331	770	391950	193	50.9913	3.6792	49.1893	NF_5mC_peak_312	PF3D7_0209500		conserved Plasmodium protein, unknown function
Pf3D7_02_v3	397981	398301	321	398125	111	8.90187	1.83809	7.91419	NF_5mC_peak_313	PF3D7_0209600		transporter, putative
Pf3D7_02_v3	400111	400505	395	400296	174	38.7379	3.21524	37.1613	NF_5mC_peak_314	PF3D7_0209700		RING zinc finger protein, putative
Pf3D7_02_v3	401515	401803	289	401685	118	12.4287	2.06309	11.3522	NF_5mC_peak_315	PF3D7_0209700		RING zinc finger protein, putative
Pf3D7_02_v3	406094	406359	266	406233	110	16.4504	2.44482	15.2846	NF_5mC_peak_316	PF3D7_0209800	UAP56	ATP-dependent RNA helicase UAP56
Pf3D7_02_v3	408085	408444	360	408266	143	31.6436	3.17166	30.1912	NF_5mC_peak_317	intergenic
Pf3D7_02_v3	413867	414321	455	414066	180	38.6676	3.13934	37.0921	NF_5mC_peak_318	PF3D7_0210200		conserved Plasmodium protein, unknown function
Pf3D7_02_v3	414691	415016	326	414838	122	18.9034	2.50847	17.6881	NF_5mC_peak_319	PF3D7_0210200		conserved Plasmodium protein, unknown function
Pf3D7_02_v3	417799	418069	271	417926	104	10.4241	2.00409	9.39655	NF_5mC_peak_320	PF3D7_0210200		conserved Plasmodium protein, unknown function
Pf3D7_02_v3	418516	418851	336	418647	93	7.11639	1.7865	6.1793	NF_5mC_peak_321	PF3D7_0210200		conserved Plasmodium protein, unknown function
Pf3D7_02_v3	419592	420050	459	419799	164	40.3968	3.45657	38.7906	NF_5mC_peak_322	PF3D7_0210200		conserved Plasmodium protein, unknown function
Pf3D7_02_v3	420428	421130	703	420673	169	33.6338	2.97163	32.1474	NF_5mC_peak_323	PF3D7_0210200		conserved Plasmodium protein, unknown function
Pf3D7_02_v3	424241	424605	365	424420	130	14.8218	2.14991	13.6918	NF_5mC_peak_324	PF3D7_0210300		monocarboxylate transporter, putative
Pf3D7_02_v3	427739	428314	576	427894	116	13.4629	2.15484	12.3625	NF_5mC_peak_325	PF3D7_0210500		conserved Plasmodium protein, unknown function
Pf3D7_02_v3	436011	436361	351	436240	122	15.5293	2.25985	14.3836	NF_5mC_peak_326	PF3D7_0210700	SYN17	syntaxin, Qa-SNARE family
Pf3D7_02_v3	442007	442282	276	442090	91	6.43463	1.73373	5.51966	NF_5mC_peak_327	PF3D7_0210900		conserved Plasmodium protein, unknown function
Pf3D7_02_v3	463403	463819	417	463627	167	35.1759	3.08663	33.6627	NF_5mC_peak_328	PF3D7_0211500		GAF domain-related protein, putative
Pf3D7_02_v3	464461	465204	744	464794	259	85.2003	4.50759	82.539	NF_5mC_peak_329	PF3D7_0211500		GAF domain-related protein, putative
Pf3D7_02_v3	469801	470068	268	469899	103	8.84072	1.8787	7.85434	NF_5mC_peak_330	PF3D7_0211700	TKL1	tyrosine kinase-like protein, putative
Pf3D7_02_v3	470705	471724	1020	471048	194	53.9224	3.83666	52.0627	NF_5mC_peak_331	PF3D7_0211700	TKL1	tyrosine kinase-like protein, putative
Pf3D7_02_v3	475218	475736	519	475454	200	52.9884	3.69293	51.1469	NF_5mC_peak_332	PF3D7_0211800	AsnRS	asparagine--tRNA ligase
Pf3D7_02_v3	477595	478092	498	477783	129	16.5016	2.27209	15.3349	NF_5mC_peak_333	PF3D7_0211800	AsnRS	asparagine--tRNA ligase
Pf3D7_02_v3	481388	481630	243	481476	102	13.3572	2.26862	12.2589	NF_5mC_peak_334	PF3D7_0212000		GDP-fructose:GMP antiporter, putative
Pf3D7_02_v3	486998	488234	1237	487887	280	104.905	5.14348	101.616	NF_5mC_peak_335	PF3D7_0212100		conserved Plasmodium protein, unknown function
Pf3D7_02_v3	490133	490504	372	490280	130	25.2245	2.88533	23.8874	NF_5mC_peak_336	PF3D7_0212200		ribosomal protein L12, mitochondrial, putative
Pf3D7_02_v3	493354	493982	629	493545	142	24.9181	2.72018	23.5869	NF_5mC_peak_337	PF3D7_0212300	ERF1	eukaryotic peptide chain release factor subunit 1, putative
Pf3D7_02_v3	499222	499520	299	499385	134	19.257	2.4184	18.0347	NF_5mC_peak_338	PF3D7_0212400		conserved Plasmodium membrane protein, unknown function
Pf3D7_02_v3	504004	504504	501	504218	139	19.8434	2.41415	18.609	NF_5mC_peak_339	PF3D7_0212400		conserved Plasmodium membrane protein, unknown function
Pf3D7_02_v3	507396	507646	251	507468	87	5.45997	1.65929	4.57807	NF_5mC_peak_340	PF3D7_0212400		conserved Plasmodium membrane protein, unknown function
Pf3D7_02_v3	509500	510676	1177	510466	183	45.5947	3.50443	43.8939	NF_5mC_peak_341	PF3D7_0212500		conserved Plasmodium protein, unknown function
Pf3D7_02_v3	511423	511727	305	511560	162	26.6852	2.6349	25.3212	NF_5mC_peak_342	PF3D7_0212500		conserved Plasmodium protein, unknown function
Pf3D7_02_v3	513316	513995	680	513598	249	88.1423	4.83361	85.3968	NF_5mC_peak_343	PF3D7_0212500		conserved Plasmodium protein, unknown function
Pf3D7_02_v3	515454	515764	311	515661	94	6.41586	1.71612	5.50136	NF_5mC_peak_344	PF3D7_0212500		conserved Plasmodium protein, unknown function
Pf3D7_02_v3	518162	518507	346	518327	178	39.1648	3.19142	37.5804	NF_5mC_peak_345	PF3D7_0212500		conserved Plasmodium protein, unknown function
Pf3D7_02_v3	518915	519335	421	519048	98	9.81718	1.99622	8.80537	NF_5mC_peak_346	PF3D7_0212500		conserved Plasmodium protein, unknown function
Pf3D7_02_v3	523601	523933	333	523708	100	8.54087	1.87163	7.56291	NF_5mC_peak_347	PF3D7_0212600	SPATR	secreted protein with altered thrombospondin repeat domain
Pf3D7_02_v3	525294	525591	298	525447	122	13.2942	2.09863	12.1979	NF_5mC_peak_348	PF3D7_0212700		SRR1-like protein
Pf3D7_02_v3	525762	526044	283	525917	119	19.3992	2.57897	18.1734	NF_5mC_peak_349	PF3D7_0212700		SRR1-like protein
Pf3D7_02_v3	528789	529310	522	529083	189	43.0938	3.28269	41.4384	NF_5mC_peak_350	PF3D7_0212800	MATE	multidrug efflux pump, putative
Pf3D7_02_v3	529376	529629	254	529505	108	10.0108	1.94338	8.99353	NF_5mC_peak_351	PF3D7_0212800	MATE	multidrug efflux pump, putative
Pf3D7_02_v3	530383	530790	408	530568	124	21.4256	2.67573	20.1609	NF_5mC_peak_352	PF3D7_0212800	MATE	multidrug efflux pump, putative
Pf3D7_02_v3	533246	533503	258	533352	77	5.40491	1.70856	4.5248	NF_5mC_peak_353	PF3D7_0212900	ATEL1	arginyl-tRNA--protein transferase
Pf3D7_02_v3	535622	535885	264	535703	93	10.1938	2.07039	9.17117	NF_5mC_peak_354	PF3D7_0213000		conserved protein, unknown function
Pf3D7_02_v3	538069	538406	338	538214	114	12.2466	2.0774	11.1746	NF_5mC_peak_355	PF3D7_0213100	SIS1	protein SIS1
Pf3D7_02_v3	540103	540356	254	540186	100	12.6244	2.22457	11.5428	NF_5mC_peak_356	PF3D7_0213100	SIS1	protein SIS1
Pf3D7_02_v3	545070	545325	256	545195	108	7.59132	1.74886	6.64053	NF_5mC_peak_357	PF3D7_0213500		tetratricopeptide repeat protein, putative
Pf3D7_02_v3	549763	550044	282	549920	101	11.2801	2.09937	10.2304	NF_5mC_peak_358	PF3D7_0213600		conserved Plasmodium protein, unknown function
Pf3D7_02_v3	553129	553601	473	553440	126	17.592	2.37387	16.4033	NF_5mC_peak_359	PF3D7_0213600		conserved Plasmodium protein, unknown function
Pf3D7_02_v3	554295	554878	584	554575	298	121.291	5.63462	117.395	NF_5mC_peak_360	PF3D7_0213600		conserved Plasmodium protein, unknown function
Pf3D7_02_v3	557834	558158	325	557979	125	20.6192	2.60392	19.3701	NF_5mC_peak_361	PF3D7_0213700		conserved protein, unknown function
Pf3D7_02_v3	561638	563583	1946	562664	278	113.798	5.65635	110.197	NF_5mC_peak_362	PF3D7_0213900		RTR1 domain-containing protein, putative
Pf3D7_02_v3	569561	570231	671	569991	148	27.2428	2.80789	25.8688	NF_5mC_peak_363	PF3D7_0214100	SEC31	protein transport protein SEC31
Pf3D7_02_v3	571011	571511	501	571290	192	43.9271	3.29297	42.257	NF_5mC_peak_364	PF3D7_0214100	SEC31	protein transport protein SEC31
Pf3D7_02_v3	572837	573170	334	573003	137	19.848	2.43166	18.6133	NF_5mC_peak_365	PF3D7_0214100	SEC31	protein transport protein SEC31
Pf3D7_02_v3	578422	578744	323	578602	106	14.872	2.35672	13.7402	NF_5mC_peak_366	PF3D7_0214300		conserved Plasmodium protein, unknown function
Pf3D7_02_v3	580062	580446	385	580297	106	14.872	2.35672	13.7402	NF_5mC_peak_367	PF3D7_0214300		conserved Plasmodium protein, unknown function
Pf3D7_02_v3	583970	585297	1328	584819	266	107.132	5.54653	103.769	NF_5mC_peak_368	PF3D7_0214300		conserved Plasmodium protein, unknown function
Pf3D7_02_v3	585673	586328	656	586031	264	98.0415	5.08585	94.9871	NF_5mC_peak_369	PF3D7_0214300		conserved Plasmodium protein, unknown function
Pf3D7_02_v3	586714	587080	367	586924	166	41.2911	3.48468	39.6692	NF_5mC_peak_370	PF3D7_0214400		protein LTV1, putative
Pf3D7_02_v3	587321	589047	1727	587841	182	41.3536	3.26926	39.7307	NF_5mC_peak_371	PF3D7_0214400		protein LTV1, putative
Pf3D7_02_v3	594371	594850	480	594633	165	27.9891	2.6834	26.6018	NF_5mC_peak_372	PF3D7_0214600	STK2	serine/threonine protein kinase STK2, putative
Pf3D7_02_v3	595017	595429	413	595235	150	24.2461	2.59695	22.9278	NF_5mC_peak_373	PF3D7_0214600	STK2	serine/threonine protein kinase STK2, putative
Pf3D7_02_v3	595692	596566	875	595974	184	39.7825	3.15647	38.1873	NF_5mC_peak_374	PF3D7_0214600	STK2	serine/threonine protein kinase STK2, putative
Pf3D7_02_v3	596726	597335	610	596969	214	74.6142	4.7327	72.258	NF_5mC_peak_375	PF3D7_0214600	STK2	serine/threonine protein kinase STK2, putative
Pf3D7_02_v3	597406	597922	517	597637	152	32.0192	3.07337	30.5609	NF_5mC_peak_376	PF3D7_0214600	STK2	serine/threonine protein kinase STK2, putative
Pf3D7_02_v3	606108	606538	431	606305	201	65.0937	4.39776	62.9814	NF_5mC_peak_377	PF3D7_0214800		conserved Plasmodium membrane protein, unknown function
Pf3D7_02_v3	607743	608534	792	608176	210	64.3436	4.18837	62.2495	NF_5mC_peak_378	PF3D7_0214800		conserved Plasmodium membrane protein, unknown function
Pf3D7_02_v3	611051	612605	1555	611938	278	118.235	5.9057	114.447	NF_5mC_peak_379	PF3D7_0214900	RON6	rhoptry neck protein 6
Pf3D7_02_v3	618175	619107	933	618315	168	45.3716	3.7223	43.6748	NF_5mC_peak_380	PF3D7_0215000	ACS9	acyl-CoA synthetase
Pf3D7_02_v3	620047	620333	287	620187	103	13.7298	2.29065	12.6235	NF_5mC_peak_381	PF3D7_0215000	ACS9	acyl-CoA synthetase
Pf3D7_02_v3	628643	629068	426	628865	180	39.3158	3.17635	37.7291	NF_5mC_peak_382	PF3D7_0215300	ACS8	acyl-CoA synthetase
Pf3D7_02_v3	635304	635956	653	635558	179	51.932	3.96458	50.1108	NF_5mC_peak_383	PF3D7_0215400		conserved Plasmodium protein, unknown function
Pf3D7_02_v3	637232	637563	332	637437	120	18.2065	2.47681	17.0046	NF_5mC_peak_384	PF3D7_0215400		conserved Plasmodium protein, unknown function
Pf3D7_02_v3	641360	641790	431	641572	158	33.5214	3.09427	32.037	NF_5mC_peak_385	PF3D7_0215500		conserved Plasmodium protein, unknown function
Pf3D7_02_v3	641887	642472	586	642126	127	23.8198	2.81926	22.5091	NF_5mC_peak_386	PF3D7_0215500		conserved Plasmodium protein, unknown function
Pf3D7_02_v3	644033	644327	295	644203	102	8.93012	1.8924	7.9407	NF_5mC_peak_387	PF3D7_0215600	GET2	Golgi to ER traffic protein 2
Pf3D7_02_v3	647261	647508	248	647269	77	2.2179	1.33084	1.47775	NF_5mC_peak_388	PF3D7_0215700	RPB2	DNA-directed RNA polymerase II subunit RPB2, putative
Pf3D7_02_v3	647754	648051	298	647974	80	4.942	1.64068	4.07884	NF_5mC_peak_389	PF3D7_0215700	RPB2	DNA-directed RNA polymerase II subunit RPB2, putative
Pf3D7_02_v3	652876	653202	327	652993	107	9.82403	1.93472	8.81174	NF_5mC_peak_390	PF3D7_0215800	ORC5	origin recognition complex subunit 5
Pf3D7_02_v3	653402	653789	388	653636	86	7.72706	1.89086	6.77171	NF_5mC_peak_391	PF3D7_0215800	ORC5	origin recognition complex subunit 5
Pf3D7_02_v3	654103	654360	258	654194	99	12.2642	2.20254	11.1912	NF_5mC_peak_392	intergenic
Pf3D7_02_v3	658713	659039	327	658846	99	9.01606	1.91919	8.02471	NF_5mC_peak_393	PF3D7_0216000		DEAD/DEAH box helicase, putative
Pf3D7_02_v3	662864	664728	1865	663462	242	70.9424	4.04976	68.6827	NF_5mC_peak_394	PF3D7_0216000		DEAD/DEAH box helicase, putative
Pf3D7_02_v3	672848	673524	677	673108	263	89.8924	4.67888	87.0943	NF_5mC_peak_395	PF3D7_0216300		conserved Plasmodium protein, unknown function
Pf3D7_02_v3	679396	679688	293	679486	109	14.3375	2.28296	13.218	NF_5mC_peak_396	PF3D7_0216500		conserved Plasmodium protein, unknown function
Pf3D7_02_v3	682468	683899	1432	683666	165	28.6984	2.72432	27.2979	NF_5mC_peak_397	PF3D7_0216500		conserved Plasmodium protein, unknown function
Pf3D7_02_v3	686627	687017	391	686796	95	10.8665	2.11444	9.82671	NF_5mC_peak_398	PF3D7_0216600		sugar transporter, putative
Pf3D7_02_v3	687157	687562	406	687323	113	12.1444	2.07677	11.0746	NF_5mC_peak_399	PF3D7_0216600		sugar transporter, putative
Pf3D7_02_v3	692776	695797	3022	695242	261	85.8012	4.50597	83.1233	NF_5mC_peak_400	PF3D7_0216700	ATG11	autophagy-related protein 11, putative
Pf3D7_02_v3	698566	698903	338	698704	109	15.6252	2.3879	14.4776	NF_5mC_peak_401	PF3D7_0216800		TMEM121 domain-containing protein, putative
Pf3D7_02_v3	700314	700623	310	700475	84	7.39397	1.87216	6.44836	NF_5mC_peak_402	intergenic
Pf3D7_02_v3	701208	701600	393	701356	133	25.8392	2.89125	24.4909	NF_5mC_peak_403	PF3D7_0216900		conserved Plasmodium protein, unknown function
Pf3D7_02_v3	701739	702423	685	701987	218	72.0336	4.4971	69.7443	NF_5mC_peak_404	PF3D7_0216900		conserved Plasmodium protein, unknown function
Pf3D7_02_v3	705347	705600	254	705497	82	5.90141	1.73191	5.00417	NF_5mC_peak_405	PF3D7_0217000		conserved Plasmodium membrane protein, unknown function
Pf3D7_02_v3	707825	708480	656	708130	206	58.871	3.93761	56.9049	NF_5mC_peak_406	PF3D7_0217100		ATP synthase subunit alpha, mitochondrial
Pf3D7_02_v3	710183	710483	301	710298	102	8.93012	1.8924	7.9407	NF_5mC_peak_407	PF3D7_0217200		conserved Plasmodium protein, unknown function
Pf3D7_02_v3	713444	713704	261	713601	99	6.4285	1.69278	5.51364	NF_5mC_peak_408	PF3D7_0217200		conserved Plasmodium protein, unknown function
Pf3D7_02_v3	714778	715045	268	714848	112	12.9852	2.14952	11.8962	NF_5mC_peak_409	PF3D7_0217200		conserved Plasmodium protein, unknown function
Pf3D7_02_v3	720256	720809	554	720618	145	32.0219	3.16939	30.5636	NF_5mC_peak_410	PF3D7_0217500	CDPK1	calcium-dependent protein kinase 1
Pf3D7_02_v3	721230	721556	327	721332	90	5.73799	1.67192	4.84659	NF_5mC_peak_411	PF3D7_0217500	CDPK1	calcium-dependent protein kinase 1
Pf3D7_02_v3	724040	724372	333	724210	76	5.2383	1.69596	4.36341	NF_5mC_peak_412	PF3D7_0217600		conserved Plasmodium protein, unknown function
Pf3D7_02_v3	725135	725983	849	725756	190	46.2953	3.4503	44.5822	NF_5mC_peak_413	PF3D7_0217600		conserved Plasmodium protein, unknown function
Pf3D7_02_v3	726634	727016	383	726807	178	42.282	3.37516	40.6418	NF_5mC_peak_414	PF3D7_0217600		conserved Plasmodium protein, unknown function
Pf3D7_02_v3	736500	736775	276	736637	122	12.3934	2.03413	11.3174	NF_5mC_peak_415	PF3D7_0217900		thioesterase/thiol ester dehydrase-isomerase, putative
Pf3D7_02_v3	743684	744135	452	743873	165	34.6107	3.07614	33.1071	NF_5mC_peak_416	PF3D7_0218200		SUZ domain-containing protein, putative
Pf3D7_02_v3	745037	745623	587	745435	121	21.1015	2.6871	19.8426	NF_5mC_peak_417	PF3D7_0218200		SUZ domain-containing protein, putative
Pf3D7_02_v3	751196	751726	531	751546	146	30.3269	3.0379	28.8978	NF_5mC_peak_418	PF3D7_0218400	DDX47	ATP-dependent RNA helicase DDX47, putative
Pf3D7_02_v3	755614	755916	303	755808	106	8.58735	1.84022	7.60825	NF_5mC_peak_419	PF3D7_0218600		patatin-like phospholipase, putative
Pf3D7_02_v3	756365	757316	952	756639	156	38.0473	3.42223	36.4829	NF_5mC_peak_420	PF3D7_0218600		patatin-like phospholipase, putative
Pf3D7_02_v3	758032	758680	649	758440	207	51.5538	3.52099	49.7405	NF_5mC_peak_421	PF3D7_0218600		patatin-like phospholipase, putative
Pf3D7_02_v3	759903	760358	456	760109	179	43.6376	3.44293	41.9721	NF_5mC_peak_422	PF3D7_0218600		patatin-like phospholipase, putative
Pf3D7_02_v3	761877	762314	438	762073	210	60.0734	3.94399	58.0792	NF_5mC_peak_423	PF3D7_0218600		patatin-like phospholipase, putative
Pf3D7_02_v3	763596	764858	1263	763968	188	43.7269	3.33032	42.0601	NF_5mC_peak_424	PF3D7_0218700	PRP45	pre-mRNA-processing protein 45, putative
Pf3D7_02_v3	769744	770108	365	769930	100	6.67419	1.70971	5.75122	NF_5mC_peak_425	PF3D7_0219100		saccharopine dehydrogenase, putative
Pf3D7_02_v3	776903	777320	418	777116	182	42.956	3.36222	41.3037	NF_5mC_peak_426	PF3D7_0219500		pseudouridine synthase, putative
Pf3D7_02_v3	777975	778294	320	778126	139	22.5728	2.59449	21.2858	NF_5mC_peak_427	PF3D7_0219500		pseudouridine synthase, putative
Pf3D7_02_v3	780457	780872	416	780657	124	15.6342	2.25111	14.4863	NF_5mC_peak_428	PF3D7_0219600	RFC1	replication factor C subunit 1
Pf3D7_02_v3	781028	781314	287	781102	91	5.26371	1.62111	4.38811	NF_5mC_peak_429	PF3D7_0219600	RFC1	replication factor C subunit 1
Pf3D7_02_v3	787157	787623	467	787382	162	36.6772	3.24397	35.1377	NF_5mC_peak_430	PF3D7_0219800		Plasmodium exported protein (PHISTc), unknown function
Pf3D7_02_v3	797165	798154	990	797649	203	63.424	4.25674	61.3528	NF_5mC_peak_431	PF3D7_0220000	LSA3	liver stage antigen 3
Pf3D7_02_v3	798638	801185	2548	800420	257	81.7583	4.36738	79.2007	NF_5mC_peak_432	PF3D7_0220000	LSA3	liver stage antigen 3
Pf3D7_02_v3	801387	801649	263	801509	121	17.7518	2.43253	16.5593	NF_5mC_peak_433	PF3D7_0220000	LSA3	liver stage antigen 3
Pf3D7_02_v3	805298	805539	242	805364	94	3.94487	1.4801	3.12034	NF_5mC_peak_434	PF3D7_0220100		DnaJ protein, putative
Pf3D7_02_v3	805854	806263	410	806064	135	27.6307	2.99546	26.2495	NF_5mC_peak_435	PF3D7_0220100		DnaJ protein, putative
Pf3D7_02_v3	807232	807689	458	807451	145	27.4081	2.85289	26.0312	NF_5mC_peak_436	PF3D7_0220100		DnaJ protein, putative
Pf3D7_02_v3	809375	809914	540	809768	111	10.4302	1.9575	9.40234	NF_5mC_peak_437	PF3D7_0220200		Plasmodium exported protein, unknown function
Pf3D7_02_v3	814931	815200	270	815014	113	12.1444	2.07677	11.0746	NF_5mC_peak_438	PF3D7_0220300		Plasmodium exported protein, unknown function
Pf3D7_02_v3	822166	822476	311	822299	111	13.3258	2.18437	12.229	NF_5mC_peak_439	intergenic
Pf3D7_02_v3	823934	824493	560	824069	91	9.53903	2.02634	8.53321	NF_5mC_peak_440	PF3D7_0220500		Plasmodium exported protein (hyp2), unknown function
Pf3D7_02_v3	834204	834612	409	834407	136	24.2893	2.74386	22.9698	NF_5mC_peak_441	PF3D7_0220700		Plasmodium exported protein (hyp9), unknown function
Pf3D7_02_v3	834976	835267	292	835065	125	22.9	2.7752	21.6068	NF_5mC_peak_442	intergenic
Pf3D7_02_v3	861043	861417	375	861215	118	13.5089	2.14306	12.4076	NF_5mC_peak_443	PF3D7_0221400		stevor
Pf3D7_02_v3	866905	867281	377	867088	164	32.0156	2.93011	30.5574	NF_5mC_peak_444	intergenic
Pf3D7_02_v3	869645	870700	1056	870543	174	31.6609	2.8078	30.2082	NF_5mC_peak_445	PF3D7_0221700		Plasmodium exported protein, unknown function
Pf3D7_02_v3	889957	890338	382	890130	137	28.6154	3.03951	27.2163	NF_5mC_peak_446	PF3D7_0222500	RIF	rifin
Pf3D7_02_v3	893368	893712	345	893547	119	15.7301	2.30022	14.5798	NF_5mC_peak_447	PF3D7_0222600	RIF	rifin
Pf3D7_02_v3	896561	896992	432	896784	145	25.9008	2.75292	24.5514	NF_5mC_peak_448	PF3D7_0222700	RIF	rifin
Pf3D7_02_v3	899743	900009	267	899860	101	8.4551	1.85816	7.47926	NF_5mC_peak_449	PF3D7_0222800		stevor
Pf3D7_02_v3	908013	908443	431	908201	151	30.2614	2.97013	28.8332	NF_5mC_peak_450	PF3D7_0223200	RIF	rifin
Pf3D7_02_v3	913808	914094	287	913957	102	12.7167	2.21361	11.6332	NF_5mC_peak_451	PF3D7_0223400	RIF	rifin
Pf3D7_02_v3	917561	918147	587	917852	145	32.6771	3.21571	31.2066	NF_5mC_peak_452	PF3D7_0223500	VAR	erythrocyte membrane protein 1, PfEMP1
Pf3D7_02_v3	918416	920004	1589	919174	194	45.9622	3.38069	44.2545	NF_5mC_peak_453	PF3D7_0223500	VAR	erythrocyte membrane protein 1, PfEMP1
Pf3D7_02_v3	920141	923241	3101	922713	246	85.1323	4.72447	82.4742	NF_5mC_peak_454	PF3D7_0223500	VAR	erythrocyte membrane protein 1, PfEMP1
Pf3D7_02_v3	923367	923821	455	923698	117	15.9115	2.33195	14.7577	NF_5mC_peak_455	PF3D7_0223500	VAR	erythrocyte membrane protein 1, PfEMP1
Pf3D7_02_v3	934579	938288	3710	936334	226	64.5995	3.95253	62.4992	NF_5mC_peak_456	intergenic
Pf3D7_02_v3	940835	941400	566	941211	99	10.1554	2.0182	9.13425	NF_5mC_peak_457	intergenic
Pf3D7_02_v3	941831	946642	4812	945516	257	89.0932	4.74018	86.3193	NF_5mC_peak_458	intergenic
Pf3D7_03_v3	7544	7959	416	7758	108	15.6534	2.40077	14.5045	NF_5mC_peak_459	intergenic
Pf3D7_03_v3	8109	8473	365	8316	94	6.73276	1.74541	5.80826	NF_5mC_peak_460	intergenic
Pf3D7_03_v3	15513	15849	337	15687	154	28.1369	2.79998	26.7464	NF_5mC_peak_461	intergenic
Pf3D7_03_v3	20366	20825	460	20510	97	6.85963	1.74109	5.93058	NF_5mC_peak_462	intergenic
Pf3D7_03_v3	24628	25033	406	24809	94	9.18595	1.96982	8.19044	NF_5mC_peak_463	intergenic
Pf3D7_03_v3	31327	31574	248	31474	120	17.9374	2.45646	16.7414	NF_5mC_peak_464	intergenic
Pf3D7_03_v3	36772	38198	1427	37856	225	73.5342	4.45641	71.2052	NF_5mC_peak_465	PF3D7_0300100	VAR	erythrocyte membrane protein 1, PfEMP1
Pf3D7_03_v3	38340	39596	1257	38601	173	38.1311	3.19147	36.5654	NF_5mC_peak_466	PF3D7_0300100	VAR	erythrocyte membrane protein 1, PfEMP1
Pf3D7_03_v3	39929	42145	2217	40870	200	55.8666	3.85757	53.9684	NF_5mC_peak_467	PF3D7_0300100	VAR	erythrocyte membrane protein 1, PfEMP1
Pf3D7_03_v3	42403	43193	791	42973	145	32.6771	3.21571	31.2066	NF_5mC_peak_468	PF3D7_0300100	VAR	erythrocyte membrane protein 1, PfEMP1
Pf3D7_03_v3	46793	47111	319	46948	74	4.7517	1.65191	3.89473	NF_5mC_peak_469	PF3D7_0300200	RIF	rifin
Pf3D7_03_v3	52613	52945	333	52730	97	11.4513	2.14907	10.398	NF_5mC_peak_470	PF3D7_0300400		stevor
Pf3D7_03_v3	55408	55659	252	55551	122	15.7968	2.27931	14.6451	NF_5mC_peak_471	PF3D7_0300500	RIF	rifin
Pf3D7_03_v3	55816	56295	480	56087	133	26.6586	2.95141	25.2952	NF_5mC_peak_472	PF3D7_0300500	RIF	rifin
Pf3D7_03_v3	61995	62440	446	62205	147	29.1495	2.94545	27.7407	NF_5mC_peak_473	PF3D7_0300700	RIF	rifin
Pf3D7_03_v3	68116	68555	440	68297	101	8.4551	1.85816	7.47926	NF_5mC_peak_474	PF3D7_0300900		stevor
Pf3D7_03_v3	69408	69794	387	69615	198	51.7292	3.65001	49.9128	NF_5mC_peak_475	PF3D7_0301000	ACS2	acyl-CoA synthetase
Pf3D7_03_v3	70051	70343	293	70194	85	5.50082	1.67363	4.61668	NF_5mC_peak_476	PF3D7_0301000	ACS2	acyl-CoA synthetase
Pf3D7_03_v3	71016	71440	425	71231	149	30.5026	3.01098	29.0707	NF_5mC_peak_477	PF3D7_0301000	ACS2	acyl-CoA synthetase
Pf3D7_03_v3	79660	79926	267	79759	91	9.53903	2.02634	8.53321	NF_5mC_peak_478	PF3D7_0301200	FIKK3	serine/threonine protein kinase, FIKK family
Pf3D7_03_v3	82758	83229	472	83013	165	29.4251	2.76651	28.0119	NF_5mC_peak_479	PF3D7_0301300	EH1	epoxide hydrolase 1
Pf3D7_03_v3	85425	85894	470	85683	191	55.9004	4.00634	54.0007	NF_5mC_peak_480	PF3D7_0301400		Plasmodium exported protein, unknown function
Pf3D7_03_v3	96313	96696	384	96616	90	5.17373	1.61672	4.30206	NF_5mC_peak_481	PF3D7_0301700		Plasmodium exported protein, unknown function
Pf3D7_03_v3	106279	106557	279	106407	109	12.6787	2.14944	11.596	NF_5mC_peak_482	PF3D7_0301900		conserved protein, unknown function
Pf3D7_03_v3	108400	108849	450	108678	97	5.39715	1.60833	4.51755	NF_5mC_peak_483	PF3D7_0302000	PRP46	pre-mRNA-splicing factor PRP46, putative
Pf3D7_03_v3	109248	109724	477	109475	144	23.1722	2.58523	21.8742	NF_5mC_peak_484	PF3D7_0302000	PRP46	pre-mRNA-splicing factor PRP46, putative
Pf3D7_03_v3	114751	115206	456	114900	128	16.3317	2.26827	15.1689	NF_5mC_peak_485	PF3D7_0302100	SRPK1	serine/threonine protein kinase
Pf3D7_03_v3	115308	115758	451	115529	140	23.4931	2.64596	22.189	NF_5mC_peak_486	PF3D7_0302100	SRPK1	serine/threonine protein kinase
Pf3D7_03_v3	117226	117997	772	117424	176	40.1383	3.27338	38.5373	NF_5mC_peak_487	PF3D7_0302100	SRPK1	serine/threonine protein kinase
Pf3D7_03_v3	124730	125078	349	124908	201	50.8352	3.55939	49.0354	NF_5mC_peak_488	PF3D7_0302200	CLAG3.2	cytoadherence linked asexual protein 3.2
Pf3D7_03_v3	128156	128492	337	128386	107	8.15885	1.7999	7.19143	NF_5mC_peak_489	intergenic
Pf3D7_03_v3	128861	129416	556	129127	164	34.8474	3.10286	33.3395	NF_5mC_peak_490	intergenic
Pf3D7_03_v3	130312	130598	287	130436	112	11.8158	2.05855	10.7537	NF_5mC_peak_491	intergenic
Pf3D7_03_v3	133691	134060	370	133893	105	13.2775	2.23316	12.1817	NF_5mC_peak_492	intergenic
Pf3D7_03_v3	140606	141064	459	140895	194	46.4589	3.40814	44.743	NF_5mC_peak_493	PF3D7_0302500	CLAG3.1	cytoadherence linked asexual protein 3.1
Pf3D7_03_v3	160394	160759	366	160544	116	11.3526	1.99626	10.3013	NF_5mC_peak_494	PF3D7_0303000	NSF	N-ethylmaleimide-sensitive fusion protein
Pf3D7_03_v3	160963	161693	731	161540	133	20.4841	2.51144	19.2373	NF_5mC_peak_495	PF3D7_0303000	NSF	N-ethylmaleimide-sensitive fusion protein
Pf3D7_03_v3	165470	165924	455	165719	176	34.5468	2.94967	33.0444	NF_5mC_peak_496	PF3D7_0303100		CLP1 P-loop domain-containing protein, putative
Pf3D7_03_v3	166500	166847	348	166670	148	26.1717	2.73855	24.8178	NF_5mC_peak_497	PF3D7_0303100		CLP1 P-loop domain-containing protein, putative
Pf3D7_03_v3	170181	171827	1647	171339	256	80.4216	4.31651	77.9029	NF_5mC_peak_498	PF3D7_0303200		lipin, putative
Pf3D7_03_v3	172180	172547	368	172324	148	25.4397	2.69159	24.0991	NF_5mC_peak_499	PF3D7_0303200		lipin, putative
Pf3D7_03_v3	175320	175590	271	175450	104	13.18	2.23429	12.0862	NF_5mC_peak_500	PF3D7_0303300	RPB6	DNA-directed RNA polymerases I, II, and III subunit RPABC2, putative
Pf3D7_03_v3	182825	183665	841	183273	189	43.297	3.29401	41.638	NF_5mC_peak_501	PF3D7_0303500		spindle pole body protein, putative
Pf3D7_03_v3	184720	184979	260	184829	99	7.13242	1.75489	6.19492	NF_5mC_peak_502	PF3D7_0303500		spindle pole body protein, putative
Pf3D7_03_v3	186866	187584	719	187414	184	47.1744	3.58463	45.4447	NF_5mC_peak_503	PF3D7_0303500		spindle pole body protein, putative
Pf3D7_03_v3	191926	192620	695	192237	198	48.6451	3.47805	46.8881	NF_5mC_peak_504	PF3D7_0303700	BCKDH-E2	lipoamide acyltransferase component of branched-chain alpha-keto acid dehydrogenase complex
Pf3D7_03_v3	195533	195840	308	195672	144	24.4005	2.66503	23.0788	NF_5mC_peak_505	PF3D7_0303800		IBR domain protein, putative
Pf3D7_03_v3	199310	199831	522	199639	174	42.2474	3.42805	40.6077	NF_5mC_peak_506	PF3D7_0304000	IMC1a	inner membrane complex protein 1a, putative
Pf3D7_03_v3	204798	205262	465	205129	97	5.80758	1.64598	4.91314	NF_5mC_peak_507	PF3D7_0304100	IMC1e	inner membrane complex protein 1e, putative
Pf3D7_03_v3	205891	206138	248	205966	94	8.31791	1.89066	7.34565	NF_5mC_peak_508	PF3D7_0304100	IMC1e	inner membrane complex protein 1e, putative
Pf3D7_03_v3	207083	207439	357	207243	160	36.9746	3.29095	35.4292	NF_5mC_peak_509	PF3D7_0304200	EHD	EH domain-containing protein
Pf3D7_03_v3	215455	215818	364	215651	123	15.2088	2.22861	14.0704	NF_5mC_peak_510	PF3D7_0304300		conserved Plasmodium protein, unknown function
Pf3D7_03_v3	221540	222348	809	221776	173	48.3165	3.83243	46.5653	NF_5mC_peak_511	PF3D7_0304600	CSP	circumsporozoite (CS) protein
Pf3D7_03_v3	224212	225407	1196	224581	227	62.486	3.82943	60.4373	NF_5mC_peak_512	PF3D7_0304700		conserved Plasmodium protein, unknown function
Pf3D7_03_v3	226885	227426	542	226991	96	11.2094	2.13647	10.1614	NF_5mC_peak_513	PF3D7_0304800		conserved Plasmodium membrane protein, unknown function
Pf3D7_03_v3	231960	232323	364	232131	114	11.7972	2.04311	10.7355	NF_5mC_peak_514	PF3D7_0304900		conserved protein, unknown function
Pf3D7_03_v3	236444	236791	348	236617	111	13.5083	2.19878	12.407	NF_5mC_peak_515	PF3D7_0305100		conserved Plasmodium protein, unknown function
Pf3D7_03_v3	238559	239279	721	239030	205	58.498	3.93183	56.5386	NF_5mC_peak_516	PF3D7_0305100		conserved Plasmodium protein, unknown function
Pf3D7_03_v3	240656	240919	264	240812	105	10.5339	2.00602	9.50264	NF_5mC_peak_517	PF3D7_0305100		conserved Plasmodium protein, unknown function
Pf3D7_03_v3	242837	243455	619	242951	127	13.5744	2.08478	12.4718	NF_5mC_peak_518	PF3D7_0305100		conserved Plasmodium protein, unknown function
Pf3D7_03_v3	244028	246407	2380	245018	229	66.7155	4.01986	64.564	NF_5mC_peak_519	PF3D7_0305100		conserved Plasmodium protein, unknown function
Pf3D7_03_v3	252322	254480	2159	253763	207	43.0085	3.08436	41.3552	NF_5mC_peak_520	PF3D7_0305200		GRIP domain-containing protein, putative
Pf3D7_03_v3	257244	257799	556	257556	276	91.398	4.546	88.5531	NF_5mC_peak_521	PF3D7_0305300		transporter, putative
Pf3D7_03_v3	259147	259499	353	259298	178	46.4591	3.63063	44.7432	NF_5mC_peak_522	PF3D7_0305300		transporter, putative
Pf3D7_03_v3	262073	262533	461	262304	202	51.9346	3.60653	50.1131	NF_5mC_peak_523	PF3D7_0305500		protein dopey homolog, putative
Pf3D7_03_v3	264775	265310	536	264992	123	17.4459	2.39074	16.2598	NF_5mC_peak_524	PF3D7_0305500		protein dopey homolog, putative
Pf3D7_03_v3	269191	269741	551	269522	231	75.7279	4.47397	73.3418	NF_5mC_peak_525	PF3D7_0305500		protein dopey homolog, putative
Pf3D7_03_v3	270094	270474	381	270292	184	43.5779	3.37245	41.9144	NF_5mC_peak_526	PF3D7_0305500		protein dopey homolog, putative
Pf3D7_03_v3	271171	271987	817	271387	177	38.652	3.17359	37.0767	NF_5mC_peak_527	PF3D7_0305500		protein dopey homolog, putative
Pf3D7_03_v3	273169	273420	252	273255	97	8.24125	1.86418	7.2717	NF_5mC_peak_528	PF3D7_0305500		protein dopey homolog, putative
Pf3D7_03_v3	276630	277305	676	277089	192	40.7261	3.11985	39.1145	NF_5mC_peak_529	PF3D7_0305600	APE1	DNA-(apurinic or apyrimidinic site) endonuclease
Pf3D7_03_v3	282189	282592	404	282388	192	47.5795	3.49687	45.8431	NF_5mC_peak_530	PF3D7_0305800		P-loop containing nucleoside triphosphate hydrolase, putative
Pf3D7_03_v3	282969	283559	591	283186	220	64.2179	4.0205	62.1295	NF_5mC_peak_531	PF3D7_0305800		P-loop containing nucleoside triphosphate hydrolase, putative
Pf3D7_03_v3	283719	284678	960	283937	232	85.282	5.00749	82.6185	NF_5mC_peak_532	PF3D7_0305800		P-loop containing nucleoside triphosphate hydrolase, putative
Pf3D7_03_v3	289238	289621	384	289526	98	9.31559	1.95222	8.31638	NF_5mC_peak_533	PF3D7_0306100		conserved Plasmodium protein, unknown function
Pf3D7_03_v3	293971	294253	283	294147	102	11.0563	2.07219	10.0124	NF_5mC_peak_534	PF3D7_0306200	AHA1	activator of Hsp90 ATPase
Pf3D7_03_v3	301541	301890	350	301746	118	16.8039	2.3904	15.6314	NF_5mC_peak_535	PF3D7_0306500	COX6C	cytochrome c oxidase subunit 6c, putative
Pf3D7_03_v3	306209	307133	925	306460	144	25.4512	2.73407	24.1102	NF_5mC_peak_536	PF3D7_0306800	CCT2	T-complex protein 1 subunit beta
Pf3D7_03_v3	315110	315644	535	315509	99	9.41714	1.95403	8.41554	NF_5mC_peak_537	PF3D7_0307200		60S ribosomal protein L7, putative
Pf3D7_03_v3	319122	319502	381	319259	186	43.6314	3.34993	41.9669	NF_5mC_peak_538	PF3D7_0307300	EB1	microtubule-associated protein RP/EB family, putative
Pf3D7_03_v3	327654	327974	321	327786	102	10.1389	1.99455	9.11813	NF_5mC_peak_539	PF3D7_0307600		conserved Plasmodium protein, unknown function
Pf3D7_03_v3	329729	330024	296	329883	126	17.592	2.37387	16.4033	NF_5mC_peak_540	PF3D7_0307700		conserved Plasmodium protein, unknown function
Pf3D7_03_v3	330469	331264	796	330779	114	15.5821	2.33465	14.4353	NF_5mC_peak_541	PF3D7_0307700		conserved Plasmodium protein, unknown function
Pf3D7_03_v3	332063	332775	713	332276	125	16.6561	2.31582	15.4863	NF_5mC_peak_542	PF3D7_0307700		conserved Plasmodium protein, unknown function
Pf3D7_03_v3	333838	334332	495	334021	107	12.2323	2.12969	11.1605	NF_5mC_peak_543	PF3D7_0307700		conserved Plasmodium protein, unknown function
Pf3D7_03_v3	337522	338093	572	337783	168	44.5807	3.66948	42.8987	NF_5mC_peak_544	PF3D7_0307800		PDZ domain-containing protein, putative
Pf3D7_03_v3	341987	342302	316	342150	111	10.1427	1.93506	9.12177	NF_5mC_peak_545	PF3D7_0307900		conserved Plasmodium protein, unknown function
Pf3D7_03_v3	343815	344741	927	344208	167	37.1333	3.20654	35.5855	NF_5mC_peak_546	PF3D7_0307900		conserved Plasmodium protein, unknown function
Pf3D7_03_v3	345183	345586	404	345401	177	41.011	3.31245	39.3937	NF_5mC_peak_547	PF3D7_0307900		conserved Plasmodium protein, unknown function
Pf3D7_03_v3	345812	346468	657	346168	215	66.9748	4.25547	64.8167	NF_5mC_peak_548	PF3D7_0307900		conserved Plasmodium protein, unknown function
Pf3D7_03_v3	347868	348523	656	348129	158	37.4021	3.34816	35.8495	NF_5mC_peak_549	PF3D7_0307900		conserved Plasmodium protein, unknown function
Pf3D7_03_v3	349114	350413	1300	349532	194	50.6489	3.64492	48.8533	NF_5mC_peak_550	PF3D7_0307900		conserved Plasmodium protein, unknown function
Pf3D7_03_v3	351325	351668	344	351527	149	27.9811	2.84474	26.5941	NF_5mC_peak_551	PF3D7_0307900		conserved Plasmodium protein, unknown function
Pf3D7_03_v3	353200	353906	707	353401	189	54.6013	3.95986	52.7288	NF_5mC_peak_552	PF3D7_0308000		DNA polymerase delta small subunit, putative
Pf3D7_03_v3	354870	355199	330	355011	169	37.5025	3.20363	35.9476	NF_5mC_peak_553	PF3D7_0308000		DNA polymerase delta small subunit, putative
Pf3D7_03_v3	357279	357618	340	357461	119	12.0876	2.03134	11.019	NF_5mC_peak_554	PF3D7_0308100		zinc finger protein, putative
Pf3D7_03_v3	358447	358792	346	358586	132	18.3078	2.37128	17.1042	NF_5mC_peak_555	PF3D7_0308100		zinc finger protein, putative
Pf3D7_03_v3	360950	361311	362	361241	75	3.85221	1.54103	3.03109	NF_5mC_peak_556	PF3D7_0308100		zinc finger protein, putative
Pf3D7_03_v3	363460	363717	258	363555	97	9.41959	1.96857	8.41779	NF_5mC_peak_557	PF3D7_0308200	CCT7	T-complex protein 1 subunit eta
Pf3D7_03_v3	366319	366744	426	366524	131	21.5035	2.60295	20.2373	NF_5mC_peak_558	PF3D7_0308300	PIC4	PhIL1-interacting candidate PIC4
Pf3D7_03_v3	376379	376632	254	376482	98	4.60911	1.53134	3.75791	NF_5mC_peak_559	PF3D7_0308700		conserved protein, unknown function
Pf3D7_03_v3	382317	383292	976	382559	179	44.3437	3.48562	42.6657	NF_5mC_peak_560	PF3D7_0308900	SF3B1	splicing factor 3B subunit 1, putative
Pf3D7_03_v3	390190	393815	3626	390637	234	73.1632	4.28392	70.8441	NF_5mC_peak_561	PF3D7_0309200	ARK2	serine/threonine protein kinase ARK2, putative
Pf3D7_03_v3	398427	398729	303	398579	146	33.1983	3.23774	31.7191	NF_5mC_peak_562	PF3D7_0309300		N2227-like protein, putative
Pf3D7_03_v3	407984	408420	437	408129	128	20.8936	2.59128	19.639	NF_5mC_peak_563	PF3D7_0309600	PfP2	60S acidic ribosomal protein P2
Pf3D7_03_v3	409578	410979	1402	410534	226	82.3548	4.95775	79.7795	NF_5mC_peak_564	PF3D7_0309700	SBP2	SECIS-binding protein 2, putative
Pf3D7_03_v3	416313	416757	445	416636	100	11.1128	2.09326	10.0678	NF_5mC_peak_565	PF3D7_0309900		conserved Plasmodium protein, unknown function
Pf3D7_03_v3	422385	423063	679	422579	160	29.0072	2.79124	27.6017	NF_5mC_peak_566	PF3D7_0310100	CDPK3	calcium-dependent protein kinase 3
Pf3D7_03_v3	423568	423996	429	423849	100	12.257	2.19252	11.1848	NF_5mC_peak_567	PF3D7_0310100	CDPK3	calcium-dependent protein kinase 3
Pf3D7_03_v3	427667	427949	283	427847	129	22.5514	2.70056	21.2648	NF_5mC_peak_568	PF3D7_0310200		phd finger protein, putative
Pf3D7_03_v3	428414	428896	483	428677	266	93.4394	4.80838	90.5331	NF_5mC_peak_569	PF3D7_0310200		phd finger protein, putative
Pf3D7_03_v3	429479	429988	510	429697	224	62.9562	3.89493	60.8979	NF_5mC_peak_570	PF3D7_0310200		phd finger protein, putative
Pf3D7_03_v3	430266	431399	1134	430970	242	84.2312	4.7483	81.6	NF_5mC_peak_571	PF3D7_0310200		phd finger protein, putative
Pf3D7_03_v3	432364	432749	386	432583	127	17.8323	2.38199	16.6382	NF_5mC_peak_572	PF3D7_0310200		phd finger protein, putative
Pf3D7_03_v3	433022	433646	625	433343	217	60.2087	3.84835	58.2095	NF_5mC_peak_573	PF3D7_0310200		phd finger protein, putative
Pf3D7_03_v3	434591	434959	369	434805	136	25.9263	2.85927	24.5766	NF_5mC_peak_574	PF3D7_0310200		phd finger protein, putative
Pf3D7_03_v3	435276	435633	358	435465	90	5.31057	1.63018	4.43338	NF_5mC_peak_575	PF3D7_0310200		phd finger protein, putative
Pf3D7_03_v3	437359	438136	778	437985	137	23.0683	2.64848	21.7722	NF_5mC_peak_576	PF3D7_0310200		phd finger protein, putative
Pf3D7_03_v3	438399	438763	365	438578	133	26.6586	2.95141	25.2952	NF_5mC_peak_577	PF3D7_0310200		phd finger protein, putative
Pf3D7_03_v3	439169	439813	645	439348	144	32.1589	3.19369	30.6974	NF_5mC_peak_578	PF3D7_0310200		phd finger protein, putative
Pf3D7_03_v3	444045	444534	490	444260	209	63.082	4.13179	61.0205	NF_5mC_peak_579	PF3D7_0310300		phosphoglycerate mutase, putative
Pf3D7_03_v3	444899	445187	289	445022	97	4.41024	1.51587	3.5671	NF_5mC_peak_580	PF3D7_0310300		phosphoglycerate mutase, putative
Pf3D7_03_v3	445379	445642	264	445476	80	3.24575	1.44995	2.45185	NF_5mC_peak_581	PF3D7_0310300		phosphoglycerate mutase, putative
Pf3D7_03_v3	447861	448224	364	448071	125	14.8039	2.18445	13.6741	NF_5mC_peak_582	PF3D7_0310400	PIESP1	parasite-infected erythrocyte surface protein
Pf3D7_03_v3	450291	451171	881	450505	244	78.9791	4.43005	76.5026	NF_5mC_peak_583	PF3D7_0310400	PIESP1	parasite-infected erythrocyte surface protein
Pf3D7_03_v3	452763	453020	258	452901	99	8.03894	1.83418	7.07458	NF_5mC_peak_584	PF3D7_0310500	DHX57	ATP-dependent RNA helicase DHX57, putative
Pf3D7_03_v3	456730	456979	250	456899	101	7.40744	1.76836	6.46141	NF_5mC_peak_585	PF3D7_0310500	DHX57	ATP-dependent RNA helicase DHX57, putative
Pf3D7_03_v3	457436	457885	450	457709	157	21.514	2.37566	20.2477	NF_5mC_peak_586	PF3D7_0310500	DHX57	ATP-dependent RNA helicase DHX57, putative
Pf3D7_03_v3	458675	458948	274	458889	94	6.5728	1.73064	5.65284	NF_5mC_peak_587	PF3D7_0310500	DHX57	ATP-dependent RNA helicase DHX57, putative
Pf3D7_03_v3	467114	467522	409	467302	140	21.5018	2.51391	20.2357	NF_5mC_peak_588	PF3D7_0310900		conserved Plasmodium protein, unknown function
Pf3D7_03_v3	471369	472042	674	471756	273	105.283	5.29764	101.978	NF_5mC_peak_589	PF3D7_0311100		pre-mRNA splicing factor, putative
Pf3D7_03_v3	476652	477235	584	476879	214	62.513	4.01875	60.4628	NF_5mC_peak_590	PF3D7_0311200		valine--tRNA ligase, putative
Pf3D7_03_v3	480200	480710	511	480454	225	63.069	3.88683	61.0091	NF_5mC_peak_591	PF3D7_0311300		phosphatidylinositol 3- and 4-kinase, putative
Pf3D7_03_v3	481169	481523	355	481355	102	7.3396	1.75739	6.3963	NF_5mC_peak_592	PF3D7_0311300		phosphatidylinositol 3- and 4-kinase, putative
Pf3D7_03_v3	489250	489789	540	489454	176	50.1133	3.8985	48.3274	NF_5mC_peak_593	PF3D7_0311400	PKRP	kinase-related protein PKRP, putative
Pf3D7_03_v3	490744	495568	4825	494384	276	100.734	5.00383	97.5919	NF_5mC_peak_594	PF3D7_0311400	PKRP	kinase-related protein PKRP, putative
Pf3D7_03_v3	507192	507518	327	507414	91	7.64282	1.84804	6.69058	NF_5mC_peak_595	PF3D7_0311800		ATP synthase F0 subunit d-like protein, putative
Pf3D7_03_v3	516170	516456	287	516341	147	27.5677	2.8404	26.188	NF_5mC_peak_596	PF3D7_0312100		E3 ubiquitin-protein ligase
Pf3D7_03_v3	518057	518460	404	518264	198	52.3926	3.68766	50.5629	NF_5mC_peak_597	PF3D7_0312200		tetratricopeptide repeat protein, putative
Pf3D7_03_v3	519109	519453	345	519272	178	40.5055	3.26975	38.8974	NF_5mC_peak_598	PF3D7_0312200		tetratricopeptide repeat protein, putative
Pf3D7_03_v3	519904	520542	639	520320	214	65.076	4.16338	62.9637	NF_5mC_peak_599	PF3D7_0312200		tetratricopeptide repeat protein, putative
Pf3D7_03_v3	525730	526470	741	525961	150	35.312	3.32584	33.7957	NF_5mC_peak_600	PF3D7_0312400	GSK3	glycogen synthase kinase 3
Pf3D7_03_v3	529884	530236	353	530083	160	25.4971	2.58317	24.1554	NF_5mC_peak_601	PF3D7_0312500	MFR3	multidrug-resistant modulator MFR3
Pf3D7_03_v3	531111	531450	340	531267	101	12.9887	2.24659	11.8988	NF_5mC_peak_602	intergenic
Pf3D7_03_v3	536396	536766	371	536575	128	24.2847	2.84128	22.9653	NF_5mC_peak_603	PF3D7_0312900		hypothetical protein
Pf3D7_03_v3	538216	538469	254	538352	89	8.90259	1.98229	7.91419	NF_5mC_peak_604	PF3D7_0313000		conserved Plasmodium protein, unknown function
Pf3D7_03_v3	539851	540468	618	540031	200	42.5552	3.13158	40.9096	NF_5mC_peak_605	PF3D7_0313100	HRD3	ubiquitin-protein ligase, putative
Pf3D7_03_v3	546816	547237	422	547016	193	46.9214	3.44664	45.1969	NF_5mC_peak_606	PF3D7_0313400		conserved Plasmodium protein, unknown function
Pf3D7_03_v3	547297	547843	547	547603	233	75.9437	4.45121	73.5524	NF_5mC_peak_607	PF3D7_0313400		conserved Plasmodium protein, unknown function
Pf3D7_03_v3	550199	550793	595	550611	103	8.47097	1.84768	7.49478	NF_5mC_peak_608	PF3D7_0313500	PfG	Ras-like G protein
Pf3D7_03_v3	551955	552761	807	552336	297	111.535	5.16639	108.02	NF_5mC_peak_609	PF3D7_0313600		conserved Plasmodium protein, unknown function
Pf3D7_03_v3	553010	553294	285	553131	112	9.93426	1.91285	8.9183	NF_5mC_peak_610	PF3D7_0313600		conserved Plasmodium protein, unknown function
Pf3D7_03_v3	554035	554640	606	554473	140	27.0155	2.8862	25.6462	NF_5mC_peak_611	PF3D7_0313600		conserved Plasmodium protein, unknown function
Pf3D7_03_v3	559135	559417	283	559297	117	19.3591	2.599	18.1341	NF_5mC_peak_612	PF3D7_0313800		conserved Plasmodium protein, unknown function
Pf3D7_03_v3	572745	573210	466	572960	210	51.6589	3.48944	49.8443	NF_5mC_peak_613	PF3D7_0314200		conserved Plasmodium protein, unknown function
Pf3D7_03_v3	580085	580477	393	580270	155	27.8475	2.77152	26.4624	NF_5mC_peak_614	PF3D7_0314400	PPP6	serine/threonine protein phosphatase 6, putative
Pf3D7_03_v3	583584	583964	381	583762	191	58.9296	4.19744	56.9599	NF_5mC_peak_615	PF3D7_0314500		conserved Plasmodium protein, unknown function
Pf3D7_03_v3	586543	586914	372	586688	146	26.5083	2.78194	25.148	NF_5mC_peak_616	PF3D7_0314600		conserved protein, unknown function
Pf3D7_03_v3	587148	587593	446	587447	92	8.48384	1.91988	7.50745	NF_5mC_peak_617	PF3D7_0314600		conserved protein, unknown function
Pf3D7_03_v3	589882	590689	808	590155	264	95.9186	4.97291	92.9385	NF_5mC_peak_618	PF3D7_0314700	RNF1	RING finger protein RNF1
Pf3D7_03_v3	590965	591788	824	591330	149	22.8514	2.51936	21.5597	NF_5mC_peak_619	PF3D7_0314700	RNF1	RING finger protein RNF1
Pf3D7_03_v3	606389	607105	717	606648	212	50.2243	3.3922	48.4363	NF_5mC_peak_620	PF3D7_0314800		conserved Plasmodium protein, unknown function
Pf3D7_03_v3	609431	610062	632	609638	156	28.8264	2.82171	27.4237	NF_5mC_peak_621	PF3D7_0314900		conserved Plasmodium membrane protein, unknown function
Pf3D7_03_v3	617415	618150	736	617792	138	23.2894	2.65303	21.9894	NF_5mC_peak_622	PF3D7_0315200	CTRP	circumsporozoite- and TRAP-related protein
Pf3D7_03_v3	618533	618787	255	618612	80	4.28621	1.56853	3.44796	NF_5mC_peak_623	PF3D7_0315200	CTRP	circumsporozoite- and TRAP-related protein
Pf3D7_03_v3	619369	619661	293	619467	115	13.2933	2.14972	12.1971	NF_5mC_peak_624	PF3D7_0315200	CTRP	circumsporozoite- and TRAP-related protein
Pf3D7_03_v3	620071	620824	754	620260	126	16.8999	2.32463	15.7251	NF_5mC_peak_625	PF3D7_0315200	CTRP	circumsporozoite- and TRAP-related protein
Pf3D7_03_v3	621067	622966	1900	621299	165	37.3233	3.24464	35.772	NF_5mC_peak_626	PF3D7_0315200	CTRP	circumsporozoite- and TRAP-related protein
Pf3D7_03_v3	626073	626679	607	626486	168	39.3784	3.33318	37.7906	NF_5mC_peak_627	PF3D7_0315300		conserved Plasmodium protein, unknown function
Pf3D7_03_v3	626791	627266	476	626997	126	15.1569	2.20178	14.0195	NF_5mC_peak_628	PF3D7_0315300		conserved Plasmodium protein, unknown function
Pf3D7_03_v3	628468	628893	426	628687	186	41.2623	3.21609	39.6406	NF_5mC_peak_629	PF3D7_0315300		conserved Plasmodium protein, unknown function
Pf3D7_03_v3	629666	630276	611	630105	147	27.7007	2.84916	26.3183	NF_5mC_peak_630	PF3D7_0315300		conserved Plasmodium protein, unknown function
Pf3D7_03_v3	633277	633609	333	633454	126	17.0226	2.33334	15.8452	NF_5mC_peak_631	PF3D7_0315500		ribosomal protein L47, mitochondrial, putative
Pf3D7_03_v3	636590	637240	651	636883	277	117.996	5.91554	114.216	NF_5mC_peak_632	PF3D7_0315600		zinc finger protein, putative
Pf3D7_03_v3	638168	638580	413	638364	173	42.069	3.43117	40.4322	NF_5mC_peak_633	PF3D7_0315700		conserved Plasmodium membrane protein, unknown function
Pf3D7_03_v3	639627	640159	533	639801	173	33.5194	2.92246	32.035	NF_5mC_peak_634	PF3D7_0315700		conserved Plasmodium membrane protein, unknown function
Pf3D7_03_v3	646444	646734	291	646557	95	10.8665	2.11444	9.82671	NF_5mC_peak_635	PF3D7_0316000	MA	microneme associated antigen
Pf3D7_03_v3	647444	647706	263	647602	108	15.6534	2.40077	14.5045	NF_5mC_peak_636	PF3D7_0316000	MA	microneme associated antigen
Pf3D7_03_v3	649361	649949	589	649440	120	14.0466	2.1676	12.9336	NF_5mC_peak_637	PF3D7_0316100		ribosomal protein L27, mitochondrial, putative
Pf3D7_03_v3	651730	652801	1072	652469	216	61.2688	3.91997	59.2494	NF_5mC_peak_638	PF3D7_0316200		conserved Plasmodium protein, unknown function
Pf3D7_03_v3	654266	654707	442	654471	148	31.1584	3.06814	29.7148	NF_5mC_peak_639	PF3D7_0316200		conserved Plasmodium protein, unknown function
Pf3D7_03_v3	654936	655302	367	655128	190	46.6	3.46767	44.8809	NF_5mC_peak_640	PF3D7_0316200		conserved Plasmodium protein, unknown function
Pf3D7_03_v3	658698	658983	286	658823	115	15.9287	2.35209	14.7745	NF_5mC_peak_641	PF3D7_0316300	PPase	inorganic pyrophosphatase, putative
Pf3D7_03_v3	662479	663250	772	662691	132	19.3628	2.44358	18.1376	NF_5mC_peak_642	PF3D7_0316400		CS domain-containing protein, putative
Pf3D7_03_v3	663648	664830	1183	664177	261	86.0413	4.51792	83.3556	NF_5mC_peak_643	PF3D7_0316400		CS domain-containing protein, putative
Pf3D7_03_v3	667745	668284	540	668072	175	44.938	3.58117	43.2491	NF_5mC_peak_644	PF3D7_0316500	NUF2	kinetochore protein NUF2, putative
Pf3D7_03_v3	671231	671547	317	671389	134	27.1431	2.97343	25.7706	NF_5mC_peak_645	PF3D7_0316600	FNT	formate-nitrite transporter
Pf3D7_03_v3	686056	686701	646	686320	158	39.5949	3.49655	38.0036	NF_5mC_peak_646	PF3D7_0317100	B9	6-cysteine protein
Pf3D7_03_v3	688984	689377	394	689187	118	13.8427	2.16786	12.7338	NF_5mC_peak_647	PF3D7_0317100	B9	6-cysteine protein
Pf3D7_03_v3	690969	691962	994	691424	175	42.5376	3.43184	40.8922	NF_5mC_peak_648	PF3D7_0317200	CRK4	cdc2-related protein kinase 4
Pf3D7_03_v3	692030	693240	1211	692600	210	60.0558	3.94299	58.0644	NF_5mC_peak_649	PF3D7_0317200	CRK4	cdc2-related protein kinase 4
Pf3D7_03_v3	694431	694877	447	694663	227	63.6692	3.89014	61.5947	NF_5mC_peak_650	PF3D7_0317200	CRK4	cdc2-related protein kinase 4
Pf3D7_03_v3	699498	700881	1384	700148	212	69.1107	4.43507	66.9	NF_5mC_peak_651	PF3D7_0317300		conserved Plasmodium protein, unknown function
Pf3D7_03_v3	701118	701382	265	701236	108	8.60603	1.83074	7.62568	NF_5mC_peak_652	PF3D7_0317300		conserved Plasmodium protein, unknown function
Pf3D7_03_v3	704484	705012	529	704827	132	16.2779	2.23383	15.1161	NF_5mC_peak_653	PF3D7_0317300		conserved Plasmodium protein, unknown function
Pf3D7_03_v3	705505	706149	645	705962	170	33.2934	2.94092	31.8125	NF_5mC_peak_654	PF3D7_0317300		conserved Plasmodium protein, unknown function
Pf3D7_03_v3	706314	706628	315	706435	136	23.7924	2.70923	22.4827	NF_5mC_peak_655	PF3D7_0317300		conserved Plasmodium protein, unknown function
Pf3D7_03_v3	709065	709665	601	709335	193	40.3545	3.08961	38.749	NF_5mC_peak_656	PF3D7_0317300		conserved Plasmodium protein, unknown function
Pf3D7_03_v3	711734	711975	242	711921	79	6.00814	1.76203	5.10665	NF_5mC_peak_657	intergenic
Pf3D7_03_v3	713839	714142	304	713988	114	14.8505	2.2777	13.7201	NF_5mC_peak_658	PF3D7_0317400		DNA replication complex GINS protein, putative
Pf3D7_03_v3	714638	715504	867	715329	198	63.593	4.36115	61.5196	NF_5mC_peak_659	intergenic
Pf3D7_03_v3	716480	716934	455	716659	110	13.0266	2.16898	11.9358	NF_5mC_peak_660	PF3D7_0317500	EG5	kinesin-5
Pf3D7_03_v3	718746	719153	408	718963	182	42.9771	3.36345	41.3245	NF_5mC_peak_661	PF3D7_0317500	EG5	kinesin-5
Pf3D7_03_v3	720271	720657	387	720431	100	7.47723	1.77969	6.52937	NF_5mC_peak_662	PF3D7_0317500	EG5	kinesin-5
Pf3D7_03_v3	720723	721046	324	720910	101	10.6905	2.04892	9.65564	NF_5mC_peak_663	PF3D7_0317500	EG5	kinesin-5
Pf3D7_03_v3	728406	728836	431	728540	79	2.97767	1.42129	2.19723	NF_5mC_peak_664	PF3D7_0317700		CPSF (cleavage and polyadenylation specific factor), subunit A, putative
Pf3D7_03_v3	731411	731780	370	731558	112	15.9515	2.38344	14.7967	NF_5mC_peak_665	PF3D7_0317700		CPSF (cleavage and polyadenylation specific factor), subunit A, putative
Pf3D7_03_v3	732511	733119	609	732809	195	50.5445	3.62476	48.7513	NF_5mC_peak_666	PF3D7_0317700		CPSF (cleavage and polyadenylation specific factor), subunit A, putative
Pf3D7_03_v3	733955	734317	363	734157	115	17.1779	2.44961	15.9977	NF_5mC_peak_667	PF3D7_0317700		CPSF (cleavage and polyadenylation specific factor), subunit A, putative
Pf3D7_03_v3	734458	735080	623	734859	162	32.2289	2.96535	30.7662	NF_5mC_peak_668	PF3D7_0317700		CPSF (cleavage and polyadenylation specific factor), subunit A, putative
Pf3D7_03_v3	738041	738898	858	738775	130	23.9032	2.78754	22.591	NF_5mC_peak_669	PF3D7_0317700		CPSF (cleavage and polyadenylation specific factor), subunit A, putative
Pf3D7_03_v3	739564	739828	265	739664	108	14.862	2.33548	13.7311	NF_5mC_peak_670	PF3D7_0317900		conserved protein, unknown function
Pf3D7_03_v3	740481	740762	282	740630	103	7.60095	1.77445	6.64973	NF_5mC_peak_671	PF3D7_0317900		conserved protein, unknown function
Pf3D7_03_v3	744479	744771	293	744633	111	14.5845	2.28413	13.4593	NF_5mC_peak_672	PF3D7_0318100	STOML	stomatin-like protein, putative
Pf3D7_03_v3	748437	748858	422	748621	137	19.2561	2.39249	18.0339	NF_5mC_peak_673	PF3D7_0318200	RPB1	DNA-directed RNA polymerase II subunit RPB1
Pf3D7_03_v3	748952	749877	926	749160	145	26.8657	2.81673	25.4986	NF_5mC_peak_674	PF3D7_0318200	RPB1	DNA-directed RNA polymerase II subunit RPB1
Pf3D7_03_v3	750925	751730	806	751537	125	16.3253	2.29223	15.1628	NF_5mC_peak_675	PF3D7_0318200	RPB1	DNA-directed RNA polymerase II subunit RPB1
Pf3D7_03_v3	751905	752444	540	752235	145	26.5924	2.79859	25.2308	NF_5mC_peak_676	PF3D7_0318200	RPB1	DNA-directed RNA polymerase II subunit RPB1
Pf3D7_03_v3	753481	754189	709	753721	196	56.4291	3.95442	54.5193	NF_5mC_peak_677	PF3D7_0318200	RPB1	DNA-directed RNA polymerase II subunit RPB1
Pf3D7_03_v3	754988	755548	561	755373	137	26.4154	2.88149	25.0567	NF_5mC_peak_678	PF3D7_0318200	RPB1	DNA-directed RNA polymerase II subunit RPB1
Pf3D7_03_v3	757888	758149	262	758032	105	10.0264	1.96428	9.00853	NF_5mC_peak_679	PF3D7_0318300		conserved Plasmodium protein, unknown function
Pf3D7_03_v3	761609	762645	1037	762279	131	22.5355	2.67652	21.2493	NF_5mC_peak_680	PF3D7_0318400		coiled-coil domain-containing protein CCDC148/CCDC112, putative
Pf3D7_03_v3	764719	764978	260	764839	99	7.05134	1.74777	6.11694	NF_5mC_peak_681	PF3D7_0318400		coiled-coil domain-containing protein CCDC148/CCDC112, putative
Pf3D7_03_v3	768031	768386	356	768148	120	13.802	2.14971	12.6939	NF_5mC_peak_682	PF3D7_0318500		conserved Plasmodium protein, unknown function
Pf3D7_03_v3	769243	769755	513	769557	173	40.5133	3.33531	38.9052	NF_5mC_peak_683	PF3D7_0318500		conserved Plasmodium protein, unknown function
Pf3D7_03_v3	770529	770947	419	770733	119	12.7576	2.08043	11.6733	NF_5mC_peak_684	PF3D7_0318500		conserved Plasmodium protein, unknown function
Pf3D7_03_v3	771570	772253	684	771759	183	43.9916	3.4097	42.3204	NF_5mC_peak_685	PF3D7_0318500		conserved Plasmodium protein, unknown function
Pf3D7_03_v3	772905	773180	276	773009	104	7.86634	1.79151	6.9074	NF_5mC_peak_686	PF3D7_0318500		conserved Plasmodium protein, unknown function
Pf3D7_03_v3	775411	775792	382	775598	181	41.9743	3.31776	40.3391	NF_5mC_peak_687	PF3D7_0318500		conserved Plasmodium protein, unknown function
Pf3D7_03_v3	776126	776980	855	776722	172	39.9459	3.31401	38.348	NF_5mC_peak_688	PF3D7_0318500		conserved Plasmodium protein, unknown function
Pf3D7_03_v3	777077	777589	513	777310	196	53.0452	3.75443	51.2026	NF_5mC_peak_689	PF3D7_0318500		conserved Plasmodium protein, unknown function
Pf3D7_03_v3	777746	778175	430	777959	173	38.0214	3.18493	36.4574	NF_5mC_peak_690	PF3D7_0318500		conserved Plasmodium protein, unknown function
Pf3D7_03_v3	778521	778872	352	778660	158	28.12	2.75776	26.7305	NF_5mC_peak_691	PF3D7_0318500		conserved Plasmodium protein, unknown function
Pf3D7_03_v3	779787	780751	965	780081	228	61.3406	3.75825	59.3167	NF_5mC_peak_692	PF3D7_0318500		conserved Plasmodium protein, unknown function
Pf3D7_03_v3	780900	782473	1574	781109	162	31.0876	2.89589	29.6457	NF_5mC_peak_693	PF3D7_0318500		conserved Plasmodium protein, unknown function
Pf3D7_03_v3	784058	784472	415	784259	158	29.2199	2.82482	27.81	NF_5mC_peak_694	PF3D7_0318600		cleavage and polyadenylation specificity factor, putative
Pf3D7_03_v3	785561	786117	557	785829	183	40.6313	3.21589	39.021	NF_5mC_peak_695	PF3D7_0318600		cleavage and polyadenylation specificity factor, putative
Pf3D7_03_v3	791816	792393	578	791999	177	38.9113	3.1887	37.3318	NF_5mC_peak_696	PF3D7_0318900		conserved protein, unknown function
Pf3D7_03_v3	797309	797560	252	797394	83	3.7035	1.49169	2.88914	NF_5mC_peak_697	PF3D7_0319000	ATPase7	P4-type ATPase ATP7, putative
Pf3D7_03_v3	798983	799390	408	799096	88	4.45319	1.5527	3.60853	NF_5mC_peak_698	PF3D7_0319000	ATPase7	P4-type ATPase ATP7, putative
Pf3D7_03_v3	805048	805829	782	805634	188	45.6264	3.43835	43.9252	NF_5mC_peak_699	PF3D7_0319200	CCR4-4	CCR4 domain-containing protein 4, putative
Pf3D7_03_v3	806347	806603	257	806454	106	14.0324	2.28659	12.9198	NF_5mC_peak_700	PF3D7_0319200	CCR4-4	CCR4 domain-containing protein 4, putative
Pf3D7_03_v3	810162	810528	367	810345	126	17.0226	2.33334	15.8452	NF_5mC_peak_701	PF3D7_0319400		kinesin-8X
Pf3D7_03_v3	811554	811984	431	811788	133	18.8635	2.40048	17.6492	NF_5mC_peak_702	PF3D7_0319400		kinesin-8X
Pf3D7_03_v3	812643	813532	890	813315	154	26.6731	2.70904	25.3094	NF_5mC_peak_703	PF3D7_0319400		kinesin-8X
Pf3D7_03_v3	816325	816874	550	816558	224	60.7183	3.77904	58.708	NF_5mC_peak_704	PF3D7_0319500		RNA-binding protein, putative
Pf3D7_03_v3	822083	822477	395	822297	199	46.309	3.33919	44.5957	NF_5mC_peak_705	PF3D7_0319700	ABCI3	ABC transporter I family member 1, putative
Pf3D7_03_v3	826845	827241	397	827049	129	13.1064	2.04017	12.0142	NF_5mC_peak_706	PF3D7_0319700	ABCI3	ABC transporter I family member 1, putative
Pf3D7_03_v3	829227	829728	502	829433	161	32.6371	3.00201	31.1681	NF_5mC_peak_707	PF3D7_0319700	ABCI3	ABC transporter I family member 1, putative
Pf3D7_03_v3	833230	833496	267	833438	81	6.06112	1.75486	5.15815	NF_5mC_peak_708	intergenic
Pf3D7_03_v3	835072	835337	266	835194	119	16.6119	2.36632	15.4429	NF_5mC_peak_709	PF3D7_0319900		conserved protein, unknown function
Pf3D7_03_v3	842592	843417	826	843044	264	84.2146	4.38248	81.584	NF_5mC_peak_710	PF3D7_0320200		CPW-WPC family protein
Pf3D7_03_v3	849019	849486	468	849250	135	20.5766	2.4987	19.3282	NF_5mC_peak_711	PF3D7_0320400	Cap380	oocyst capsule protein Cap380
Pf3D7_03_v3	849789	850254	466	849963	133	15.1275	2.14997	13.9906	NF_5mC_peak_712	PF3D7_0320400	Cap380	oocyst capsule protein Cap380
Pf3D7_03_v3	850440	851457	1018	851319	105	9.03055	1.88238	8.0387	NF_5mC_peak_713	PF3D7_0320400	Cap380	oocyst capsule protein Cap380
Pf3D7_03_v3	867916	868157	242	867993	101	12.9887	2.24659	11.8988	NF_5mC_peak_714	intergenic
Pf3D7_03_v3	870217	870487	271	870308	111	16.8547	2.46685	15.6805	NF_5mC_peak_715	PF3D7_0320800	DOZI	ATP-dependent RNA helicase DDX6
Pf3D7_03_v3	870957	871209	253	870983	79	2.78813	1.39821	2.01722	NF_5mC_peak_716	PF3D7_0320800	DOZI	ATP-dependent RNA helicase DDX6
Pf3D7_03_v3	877933	879031	1099	878562	256	79.74	4.28308	77.2415	NF_5mC_peak_717	PF3D7_0321000		conserved protein, unknown function
Pf3D7_03_v3	879953	880466	514	880245	124	16.2691	2.2966	15.1075	NF_5mC_peak_718	PF3D7_0321100		conserved Plasmodium protein, unknown function
Pf3D7_03_v3	880921	881648	728	881208	155	33.1753	3.11044	31.6972	NF_5mC_peak_719	PF3D7_0321100		conserved Plasmodium protein, unknown function
Pf3D7_03_v3	884278	884752	475	884444	132	19.062	2.4229	17.8431	NF_5mC_peak_720	PF3D7_0321100		conserved Plasmodium protein, unknown function
Pf3D7_03_v3	891029	891761	733	891170	119	15.7677	2.30303	14.6165	NF_5mC_peak_721	PF3D7_0321300		conserved Plasmodium protein, unknown function
Pf3D7_03_v3	892244	892774	531	892536	220	63.0798	3.959	61.0184	NF_5mC_peak_722	PF3D7_0321300		conserved Plasmodium protein, unknown function
Pf3D7_03_v3	898270	898674	405	898481	101	8.69413	1.87858	7.71157	NF_5mC_peak_723	PF3D7_0321500		peptidase, putative
Pf3D7_03_v3	900777	901551	775	901231	192	48.9716	3.57647	47.2077	NF_5mC_peak_724	PF3D7_0321600	DDX42	ATP-dependent RNA helicase DDX42, putative
Pf3D7_03_v3	902631	903130	500	902905	230	72.2369	4.29875	69.942	NF_5mC_peak_725	PF3D7_0321600	DDX42	ATP-dependent RNA helicase DDX42, putative
Pf3D7_03_v3	905146	906919	1774	906278	257	82.4575	4.402	79.879	NF_5mC_peak_726	PF3D7_0321700		conserved Plasmodium protein, unknown function
Pf3D7_03_v3	907195	907697	503	907530	192	51.7291	3.73736	49.9127	NF_5mC_peak_727	PF3D7_0321700		conserved Plasmodium protein, unknown function
Pf3D7_03_v3	909202	909468	267	909350	124	20.8307	2.63096	19.5773	NF_5mC_peak_728	PF3D7_0321700		conserved Plasmodium protein, unknown function
Pf3D7_03_v3	912925	913336	412	913066	134	18.383	2.35948	17.1779	NF_5mC_peak_729	PF3D7_0321800		WD repeat-containing protein, putative
Pf3D7_03_v3	913641	914050	410	913803	149	24.0921	2.59662	22.7766	NF_5mC_peak_730	PF3D7_0321800		WD repeat-containing protein, putative
Pf3D7_03_v3	915829	916284	456	916027	184	43.0495	3.34191	41.3955	NF_5mC_peak_731	PF3D7_0321800		WD repeat-containing protein, putative
Pf3D7_03_v3	917042	918529	1488	917879	192	45.2693	3.36709	43.575	NF_5mC_peak_732	PF3D7_0321800		WD repeat-containing protein, putative
Pf3D7_03_v3	920501	921018	518	920824	192	48.9716	3.57647	47.2077	NF_5mC_peak_733	PF3D7_0321800		WD repeat-containing protein, putative
Pf3D7_03_v3	923925	924312	388	924121	169	31.2534	2.83317	29.808	NF_5mC_peak_734	PF3D7_0321900	CARL	cyclic amine resistance locus protein
Pf3D7_03_v3	924687	924951	265	924767	104	7.86634	1.79151	6.9074	NF_5mC_peak_735	PF3D7_0321900	CARL	cyclic amine resistance locus protein
Pf3D7_03_v3	930807	931092	286	931010	105	6.39734	1.66352	5.48342	NF_5mC_peak_736	PF3D7_0322100	Prt1	mRNA-capping enzyme subunit beta
Pf3D7_03_v3	935860	936566	707	936321	168	41.1657	3.44659	39.5459	NF_5mC_peak_737	PF3D7_0322200		conserved protein, unknown function
Pf3D7_03_v3	937914	938319	406	938137	111	16.0198	2.39918	14.8638	NF_5mC_peak_738	PF3D7_0322300	DGAT	diacylglycerol O-acyltransferase
Pf3D7_03_v3	939500	939807	308	939669	98	8.92848	1.91826	7.93921	NF_5mC_peak_739	PF3D7_0322300	DGAT	diacylglycerol O-acyltransferase
Pf3D7_03_v3	942707	943432	726	943235	159	30.0694	2.86625	28.645	NF_5mC_peak_740	PF3D7_0322400		regulator of initiation factor 2 (eIF2)
Pf3D7_03_v3	943741	944553	813	944103	148	34.2494	3.28179	32.7518	NF_5mC_peak_741	PF3D7_0322400		regulator of initiation factor 2 (eIF2)
Pf3D7_03_v3	945843	946220	378	946044	159	30.4608	2.8903	29.0297	NF_5mC_peak_742	PF3D7_0322500	IscA2	iron-sulfur assembly protein, putative
Pf3D7_03_v3	948354	949270	917	948606	231	73.9279	4.3745	71.5893	NF_5mC_peak_743	PF3D7_0322600		conserved Plasmodium protein, unknown function
Pf3D7_03_v3	950533	951557	1025	951340	141	21.9923	2.5368	20.7169	NF_5mC_peak_744	PF3D7_0322600		conserved Plasmodium protein, unknown function
Pf3D7_03_v3	959788	960154	367	959954	126	21.6529	2.66928	20.3834	NF_5mC_peak_745	PF3D7_0322700		conserved Plasmodium protein, unknown function
Pf3D7_03_v3	971213	972923	1711	971813	210	51.1463	3.46284	49.3413	NF_5mC_peak_746	PF3D7_0323100		conserved Plasmodium protein, unknown function
Pf3D7_03_v3	973119	973474	356	973299	116	13.6405	2.16825	12.5364	NF_5mC_peak_747	PF3D7_0323100		conserved Plasmodium protein, unknown function
Pf3D7_03_v3	974491	974901	411	974714	122	16.1266	2.30334	14.9678	NF_5mC_peak_748	PF3D7_0323100		conserved Plasmodium protein, unknown function
Pf3D7_03_v3	977385	977679	295	977530	111	12.6173	2.12859	11.5366	NF_5mC_peak_749	PF3D7_0323200		conserved Plasmodium protein, unknown function
Pf3D7_03_v3	981302	981768	467	981580	156	26.8473	2.70014	25.4808	NF_5mC_peak_750	PF3D7_0323400	RIPR	Rh5 interacting protein
Pf3D7_03_v3	986365	986948	584	986507	114	14.9158	2.28276	13.7831	NF_5mC_peak_751	PF3D7_0323500	SMN	survival motor neuron-like protein
Pf3D7_03_v3	987240	987728	489	987571	90	8.61005	1.94653	7.62962	NF_5mC_peak_752	PF3D7_0323500	SMN	survival motor neuron-like protein
Pf3D7_03_v3	989131	989447	317	989218	113	10.4302	1.94507	9.40234	NF_5mC_peak_753	PF3D7_0323600		BSD domain-containing protein, putative
Pf3D7_03_v3	991546	991859	314	991679	105	13.2775	2.23316	12.1817	NF_5mC_peak_754	PF3D7_0323700	SART1	U4/U6.U5 tri-snRNP-associated protein 1, putative
Pf3D7_03_v3	991971	993688	1718	993481	232	73.1898	4.31771	70.8698	NF_5mC_peak_755	PF3D7_0323700	SART1	U4/U6.U5 tri-snRNP-associated protein 1, putative
Pf3D7_03_v3	998754	999155	402	999041	121	17.3929	2.40576	16.208	NF_5mC_peak_756	PF3D7_0323800		conserved Plasmodium protein, unknown function
Pf3D7_03_v3	1001248	1001514	267	1001373	101	10.8908	2.06604	9.85066	NF_5mC_peak_757	PF3D7_0323800		conserved Plasmodium protein, unknown function
Pf3D7_03_v3	1019203	1019595	393	1019389	129	19.0726	2.45123	17.8534	NF_5mC_peak_758	PF3D7_0324500	RIF	rifin
Pf3D7_03_v3	1030602	1030952	351	1030744	104	14.1065	2.31267	12.9916	NF_5mC_peak_759	PF3D7_0324900	VAR	erythrocyte membrane protein 1, PfEMP1
Pf3D7_03_v3	1031011	1031344	334	1031205	96	8.91099	1.93046	7.92226	NF_5mC_peak_760	PF3D7_0324900	VAR	erythrocyte membrane protein 1, PfEMP1
Pf3D7_03_v3	1032352	1034959	2608	1033246	215	75.3461	4.75749	72.9694	NF_5mC_peak_761	PF3D7_0324900	VAR	erythrocyte membrane protein 1, PfEMP1
Pf3D7_03_v3	1035157	1036501	1345	1036270	163	33.6186	3.03908	32.1326	NF_5mC_peak_762	PF3D7_0324900	VAR	erythrocyte membrane protein 1, PfEMP1
Pf3D7_03_v3	1037046	1038035	990	1037317	180	40.9322	3.26965	39.3161	NF_5mC_peak_763	PF3D7_0324900	VAR	erythrocyte membrane protein 1, PfEMP1
Pf3D7_03_v3	1043064	1043407	344	1043227	119	20.0044	2.62597	18.767	NF_5mC_peak_764	intergenic
Pf3D7_03_v3	1045991	1046296	306	1046148	92	7.20745	1.8009	6.2679	NF_5mC_peak_765	intergenic
Pf3D7_03_v3	1051132	1055022	3891	1053065	232	73.1945	4.31797	70.8744	NF_5mC_peak_766	intergenic
Pf3D7_03_v3	1057647	1058048	402	1057851	106	12.1204	2.12869	11.0511	NF_5mC_peak_767	intergenic
Pf3D7_03_v3	1058514	1059141	628	1058834	172	42.0292	3.44299	40.3931	NF_5mC_peak_768	intergenic
Pf3D7_03_v3	1059215	1059588	374	1059412	92	9.86414	2.04837	8.84981	NF_5mC_peak_769	intergenic
Pf3D7_03_v3	1059727	1063363	3637	1062556	251	83.5274	4.55222	80.9177	NF_5mC_peak_770	intergenic
Pf3D7_04_v3	8401	10544	2144	9456	228	62.4934	3.81644	60.4442	NF_5mC_peak_771	intergenic
Pf3D7_04_v3	13595	13973	379	13703	77	2.38078	1.35228	1.63146	NF_5mC_peak_772	intergenic
Pf3D7_04_v3	14977	15237	261	15103	91	7.62892	1.84673	6.67697	NF_5mC_peak_773	intergenic
Pf3D7_04_v3	15400	15642	243	15511	92	5.77733	1.66601	4.8838	NF_5mC_peak_774	intergenic
Pf3D7_04_v3	16871	17143	273	17033	85	4.59708	1.58006	3.74635	NF_5mC_peak_775	intergenic
Pf3D7_04_v3	19539	20029	491	19883	87	8.28481	1.93824	7.3135	NF_5mC_peak_776	intergenic
Pf3D7_04_v3	20249	20625	377	20449	138	26.1129	2.84778	24.7601	NF_5mC_peak_777	intergenic
Pf3D7_04_v3	22368	22713	346	22509	101	9.41734	1.94027	8.41563	NF_5mC_peak_778	intergenic
Pf3D7_04_v3	23048	23299	252	23182	88	7.34408	1.83928	6.40069	NF_5mC_peak_779	intergenic
Pf3D7_04_v3	26843	27161	319	27038	97	10.0595	2.02527	9.04063	NF_5mC_peak_780	intergenic
Pf3D7_04_v3	28642	32165	3524	29488	175	40.2985	3.29584	38.6939	NF_5mC_peak_781	PF3D7_0400100	VAR	erythrocyte membrane protein 1, PfEMP1
Pf3D7_04_v3	32885	35612	2728	33867	214	70.2563	4.46631	68.0156	NF_5mC_peak_782	PF3D7_0400100	VAR	erythrocyte membrane protein 1, PfEMP1
Pf3D7_04_v3	35706	36329	624	36064	157	39.12	3.48002	37.5364	NF_5mC_peak_783	PF3D7_0400100	VAR	erythrocyte membrane protein 1, PfEMP1
Pf3D7_04_v3	38336	38968	633	38561	189	58.1482	4.18483	56.1993	NF_5mC_peak_784	intergenic
Pf3D7_04_v3	42456	42862	407	42677	138	23.8564	2.69167	22.5451	NF_5mC_peak_785	PF3D7_0400300	RIF	rifin
Pf3D7_04_v3	45674	46052	379	45873	144	23.6989	2.61934	22.3909	NF_5mC_peak_786	PF3D7_0400400	VAR	erythrocyte membrane protein 1, PfEMP1
Pf3D7_04_v3	46942	48621	1680	48479	153	27.3109	2.75876	25.9356	NF_5mC_peak_787	PF3D7_0400400	VAR	erythrocyte membrane protein 1, PfEMP1
Pf3D7_04_v3	49084	50014	931	49300	132	23.3357	2.72244	22.035	NF_5mC_peak_788	PF3D7_0400400	VAR	erythrocyte membrane protein 1, PfEMP1
Pf3D7_04_v3	50528	51039	512	50758	118	18.9003	2.55158	17.6851	NF_5mC_peak_789	PF3D7_0400400	VAR	erythrocyte membrane protein 1, PfEMP1
Pf3D7_04_v3	52228	54744	2517	53663	181	47.0377	3.62077	45.3113	NF_5mC_peak_790	PF3D7_0400400	VAR	erythrocyte membrane protein 1, PfEMP1
Pf3D7_04_v3	54917	56861	1945	56226	145	23.1232	2.57263	21.8261	NF_5mC_peak_791	PF3D7_0400400	VAR	erythrocyte membrane protein 1, PfEMP1
Pf3D7_04_v3	63597	64008	412	63802	158	39.4519	3.48676	37.863	NF_5mC_peak_792	PF3D7_0400700	RIF	rifin
Pf3D7_04_v3	73611	74012	402	73823	166	38.1894	3.28576	36.6227	NF_5mC_peak_793	PF3D7_0401000	RIF	rifin
Pf3D7_04_v3	82737	83063	327	82883	111	13.3864	2.18915	12.2876	NF_5mC_peak_794	PF3D7_0401300	RIF	rifin
Pf3D7_04_v3	85643	86284	642	85840	109	12.5694	2.14069	11.4899	NF_5mC_peak_795	PF3D7_0401400	RIF	rifin
Pf3D7_04_v3	89331	89690	360	89470	131	21.8287	2.62605	20.5562	NF_5mC_peak_796	intergenic
Pf3D7_04_v3	92939	93544	606	93310	205	60.7458	4.06204	58.7345	NF_5mC_peak_797	PF3D7_0401600	RIF	rifin
Pf3D7_04_v3	100904	101608	705	101161	173	36.8758	3.11704	35.3328	NF_5mC_peak_798	intergenic
Pf3D7_04_v3	104305	104800	496	104585	120	20.6606	2.66508	19.41	NF_5mC_peak_799	PF3D7_0401800	PfD80	Plasmodium exported protein (PHISTb), unknown function
Pf3D7_04_v3	108382	109289	908	108864	229	85.178	5.06585	82.5175	NF_5mC_peak_800	PF3D7_0401900	ACS6	acyl-CoA synthetase
Pf3D7_04_v3	110289	111130	842	110568	221	72.4524	4.46628	70.1523	NF_5mC_peak_801	PF3D7_0401900	ACS6	acyl-CoA synthetase
Pf3D7_04_v3	115255	115737	483	115519	203	54.1632	3.71632	52.2982	NF_5mC_peak_802	PF3D7_0402000		Plasmodium exported protein (PHISTa), unknown function
Pf3D7_04_v3	124039	124434	396	124220	155	28.2194	2.79459	26.8275	NF_5mC_peak_803	PF3D7_0402100		Plasmodium exported protein (PHISTb), unknown function
Pf3D7_04_v3	124602	125040	439	124822	110	13.5305	2.20909	12.4288	NF_5mC_peak_804	PF3D7_0402100		Plasmodium exported protein (PHISTb), unknown function
Pf3D7_04_v3	126945	127415	471	127114	114	16.1555	2.37955	14.9961	NF_5mC_peak_805	intergenic
Pf3D7_04_v3	127470	130905	3436	128182	206	56.9376	3.8282	55.0157	NF_5mC_peak_806	intergenic
Pf3D7_04_v3	131139	132027	889	131438	221	56.2186	3.58864	54.312	NF_5mC_peak_807	intergenic
Pf3D7_04_v3	132904	133516	613	133159	187	47.5759	3.56541	45.8395	NF_5mC_peak_808	intergenic
Pf3D7_04_v3	133766	134017	252	133993	87	3.39369	1.44422	2.59353	NF_5mC_peak_809	intergenic
Pf3D7_04_v3	134290	134553	264	134429	91	6.05938	1.6979	5.15643	NF_5mC_peak_810	intergenic
Pf3D7_04_v3	139460	140697	1238	139744	188	39.1594	3.07831	37.5751	NF_5mC_peak_811	PF3D7_0402300	RH1	reticulocyte binding protein homologue 1
Pf3D7_04_v3	141154	141754	601	141339	140	22.6765	2.59151	21.3879	NF_5mC_peak_812	PF3D7_0402300	RH1	reticulocyte binding protein homologue 1
Pf3D7_04_v3	142880	143253	374	143061	117	12.6596	2.08717	11.5774	NF_5mC_peak_813	PF3D7_0402300	RH1	reticulocyte binding protein homologue 1
Pf3D7_04_v3	144239	144727	489	144657	106	7.89178	1.78323	6.93221	NF_5mC_peak_814	PF3D7_0402300	RH1	reticulocyte binding protein homologue 1
Pf3D7_04_v3	145869	146576	708	146176	153	29.6023	2.90377	28.1863	NF_5mC_peak_815	PF3D7_0402300	RH1	reticulocyte binding protein homologue 1
Pf3D7_04_v3	147692	148092	401	147812	102	9.72177	1.95929	8.71209	NF_5mC_peak_816	PF3D7_0402400	GEXP18	Plasmodium exported protein, unknown function
Pf3D7_04_v3	162942	163361	420	163250	104	10.5573	2.01515	9.52532	NF_5mC_peak_817	intergenic
Pf3D7_04_v3	165569	166033	465	165880	168	35.2418	3.07872	33.7274	NF_5mC_peak_818	intergenic
Pf3D7_04_v3	167354	168826	1473	168154	149	28.8981	2.90468	27.4943	NF_5mC_peak_819	intergenic
Pf3D7_04_v3	169185	169877	693	169401	146	24.9119	2.67794	23.5809	NF_5mC_peak_820	intergenic
Pf3D7_04_v3	170461	170746	286	170650	91	8.69945	1.9474	7.71682	NF_5mC_peak_821	intergenic
Pf3D7_04_v3	175905	176380	476	175968	95	7.5331	1.81293	6.58374	NF_5mC_peak_822	PF3D7_0403100		regulator of chromosome condensation, putative
Pf3D7_04_v3	178474	180245	1772	179099	281	104.801	5.11981	101.515	NF_5mC_peak_823	PF3D7_0403200		pre-mRNA splicing factor, putative
Pf3D7_04_v3	184226	184521	296	184350	104	12.414	2.16993	11.3377	NF_5mC_peak_824	PF3D7_0403400		conserved Plasmodium protein, unknown function
Pf3D7_04_v3	189439	189923	485	189700	206	56.5153	3.80456	54.6017	NF_5mC_peak_825	PF3D7_0403400		conserved Plasmodium protein, unknown function
Pf3D7_04_v3	193564	193804	241	193718	90	6.84077	1.77817	5.91218	NF_5mC_peak_826	PF3D7_0403400		conserved Plasmodium protein, unknown function
Pf3D7_04_v3	197694	197963	270	197892	90	9.2185	2.00431	8.22134	NF_5mC_peak_827	PF3D7_0403600		conserved Plasmodium protein, unknown function
Pf3D7_04_v3	198834	199437	604	199162	167	31.4784	2.86642	30.0295	NF_5mC_peak_828	PF3D7_0403600		conserved Plasmodium protein, unknown function
Pf3D7_04_v3	206094	206716	623	206508	211	69.3259	4.46697	67.1084	NF_5mC_peak_829	PF3D7_0403700	CLF1	pre-mRNA-splicing factor CLF1, putative
Pf3D7_04_v3	208696	209264	569	209058	168	42.4035	3.52641	40.7613	NF_5mC_peak_830	PF3D7_0403700	CLF1	pre-mRNA-splicing factor CLF1, putative
Pf3D7_04_v3	210397	210688	292	210571	111	16.8547	2.46685	15.6805	NF_5mC_peak_831	PF3D7_0403800		alpha/beta hydrolase, putative
Pf3D7_04_v3	212894	213211	318	213074	107	10.1961	1.96477	9.17344	NF_5mC_peak_832	PF3D7_0403800		alpha/beta hydrolase, putative
Pf3D7_04_v3	220239	220768	530	220475	238	79.3608	4.55195	76.874	NF_5mC_peak_833	PF3D7_0403900	SET8	SET domain protein, putative
Pf3D7_04_v3	222435	222799	365	222605	113	13.5821	2.18787	12.4793	NF_5mC_peak_834	PF3D7_0403900	SET8	SET domain protein, putative
Pf3D7_04_v3	223946	224245	300	224090	139	28.4041	2.99682	27.0091	NF_5mC_peak_835	PF3D7_0404000		conserved Plasmodium protein, unknown function
Pf3D7_04_v3	227819	228445	627	228033	150	28.9749	2.89797	27.5699	NF_5mC_peak_836	PF3D7_0404100	ApiAP2	AP2 domain transcription factor AP2-SP2, putative
Pf3D7_04_v3	228805	229354	550	229120	243	72.945	4.13566	70.631	NF_5mC_peak_837	PF3D7_0404100	ApiAP2	AP2 domain transcription factor AP2-SP2, putative
Pf3D7_04_v3	230718	231567	850	231075	193	45.2154	3.3518	43.5218	NF_5mC_peak_838	PF3D7_0404100	ApiAP2	AP2 domain transcription factor AP2-SP2, putative
Pf3D7_04_v3	234954	236357	1404	236112	238	91.6946	5.26408	88.8388	NF_5mC_peak_839	PF3D7_0404300		conserved Plasmodium protein, unknown function
Pf3D7_04_v3	239088	239486	399	239288	141	23.0885	2.60893	21.792	NF_5mC_peak_840	PF3D7_0404400	P36	6-cysteine protein P36
Pf3D7_04_v3	247699	248014	316	247865	143	22.9384	2.57962	21.6444	NF_5mC_peak_841	PF3D7_0404600		conserved Plasmodium membrane protein, unknown function
Pf3D7_04_v3	250308	250556	249	250436	104	10.6848	2.02573	9.65001	NF_5mC_peak_842	PF3D7_0404600		conserved Plasmodium membrane protein, unknown function
Pf3D7_04_v3	251603	251869	267	251753	104	10.9294	2.04606	9.88867	NF_5mC_peak_843	PF3D7_0404600		conserved Plasmodium membrane protein, unknown function
Pf3D7_04_v3	253927	254402	476	254158	178	39.7177	3.2236	38.1238	NF_5mC_peak_844	PF3D7_0404600		conserved Plasmodium membrane protein, unknown function
Pf3D7_04_v3	255443	256304	862	255629	197	53.8675	3.78723	52.0086	NF_5mC_peak_845	PF3D7_0404600		conserved Plasmodium membrane protein, unknown function
Pf3D7_04_v3	256815	257057	243	257001	86	5.14874	1.63262	4.2777	NF_5mC_peak_846	PF3D7_0404600		conserved Plasmodium membrane protein, unknown function
Pf3D7_04_v3	258294	258619	326	258468	114	13.9084	2.20485	12.7982	NF_5mC_peak_847	PF3D7_0404600		conserved Plasmodium membrane protein, unknown function
Pf3D7_04_v3	260515	260939	425	260709	179	46.6079	3.62458	44.8886	NF_5mC_peak_848	PF3D7_0404700	DPAP3	dipeptidyl aminopeptidase 3
Pf3D7_04_v3	262312	262979	668	262600	197	48.6085	3.4889	46.8522	NF_5mC_peak_849	PF3D7_0404700	DPAP3	dipeptidyl aminopeptidase 3
Pf3D7_04_v3	263267	263623	357	263498	122	19.7072	2.56889	18.4759	NF_5mC_peak_850	PF3D7_0404700	DPAP3	dipeptidyl aminopeptidase 3
Pf3D7_04_v3	265353	266062	710	265825	205	59.2363	3.97429	57.2613	NF_5mC_peak_851	PF3D7_0404800		sporozoite-specific protein S10, putative
Pf3D7_04_v3	269628	269904	277	269736	97	11.1499	2.12219	10.1039	NF_5mC_peak_852	PF3D7_0405000	DDX51	ATP-dependent RNA helicase DDX51, putative
Pf3D7_04_v3	270778	271137	360	270936	125	16.0988	2.27611	14.9405	NF_5mC_peak_853	PF3D7_0405000	DDX51	ATP-dependent RNA helicase DDX51, putative
Pf3D7_04_v3	274006	274309	304	274122	118	13.5089	2.14306	12.4076	NF_5mC_peak_854	PF3D7_0405100	SEC24B	protein transport protein Sec24B, putative
Pf3D7_04_v3	275395	276021	627	275845	175	36.141	3.05129	34.6108	NF_5mC_peak_855	PF3D7_0405100	SEC24B	protein transport protein Sec24B, putative
Pf3D7_04_v3	282394	283103	710	282816	198	57.6962	3.9974	55.7564	NF_5mC_peak_856	PF3D7_0405300	LISP2	liver specific protein 2, putative
Pf3D7_04_v3	284810	287417	2608	286379	257	87.8329	4.67458	85.0965	NF_5mC_peak_857	PF3D7_0405300	LISP2	liver specific protein 2, putative
Pf3D7_04_v3	291893	292283	391	292100	156	30.9121	2.95242	29.473	NF_5mC_peak_858	PF3D7_0405400	PRPF8	pre-mRNA-processing-splicing factor 8, putative
Pf3D7_04_v3	292530	292974	445	292699	160	25.4971	2.58317	24.1554	NF_5mC_peak_859	PF3D7_0405400	PRPF8	pre-mRNA-processing-splicing factor 8, putative
Pf3D7_04_v3	293854	294400	547	294121	218	64.9662	4.09249	62.8565	NF_5mC_peak_860	PF3D7_0405400	PRPF8	pre-mRNA-processing-splicing factor 8, putative
Pf3D7_04_v3	295068	295667	600	295460	152	28.1718	2.82369	26.7808	NF_5mC_peak_861	PF3D7_0405400	PRPF8	pre-mRNA-processing-splicing factor 8, putative
Pf3D7_04_v3	296779	297348	570	297019	167	35.6131	3.1132	34.0921	NF_5mC_peak_862	PF3D7_0405400	PRPF8	pre-mRNA-processing-splicing factor 8, putative
Pf3D7_04_v3	306303	306865	563	306630	145	27.8914	2.88529	26.5057	NF_5mC_peak_863	PF3D7_0405700		lysine decarboxylase, putative
Pf3D7_04_v3	308335	308581	247	308368	82	3.72497	1.49776	2.90973	NF_5mC_peak_864	PF3D7_0405700		lysine decarboxylase, putative
Pf3D7_04_v3	309111	309653	543	309454	185	43.0975	3.33201	41.4418	NF_5mC_peak_865	PF3D7_0405700		lysine decarboxylase, putative
Pf3D7_04_v3	312406	312973	568	312743	124	19.116	2.50352	17.8962	NF_5mC_peak_866	PF3D7_0405700		lysine decarboxylase, putative
Pf3D7_04_v3	317102	318007	906	317553	178	51.3233	3.94255	49.5137	NF_5mC_peak_867	PF3D7_0405900	ASP	apical sushi protein
Pf3D7_04_v3	321092	321336	245	321202	100	8.7295	1.88788	7.74587	NF_5mC_peak_868	PF3D7_0406000		conserved protein, unknown function
Pf3D7_04_v3	323796	324664	869	324457	188	46.7391	3.50256	45.0175	NF_5mC_peak_869	PF3D7_0406100		V-type proton ATPase subunit B
Pf3D7_04_v3	329568	330155	588	329977	192	54.6631	3.91339	52.7896	NF_5mC_peak_870	PF3D7_0406200	Pfs16	parasitophorous vacuole membrane protein S16
Pf3D7_04_v3	334085	334375	291	334216	135	23.2398	2.68183	21.9408	NF_5mC_peak_871	PF3D7_0406400	cGLO2	cytosolic glyoxalase II
Pf3D7_04_v3	335134	336628	1495	335343	215	61.3197	3.93756	59.2966	NF_5mC_peak_872	PF3D7_0406500		NYN domain-containing protein, putative
Pf3D7_04_v3	336687	337368	682	337201	159	40.2328	3.52407	38.6293	NF_5mC_peak_873	PF3D7_0406500		NYN domain-containing protein, putative
Pf3D7_04_v3	337554	337959	406	337761	89	8.20226	1.9151	7.23386	NF_5mC_peak_874	PF3D7_0406500		NYN domain-containing protein, putative
Pf3D7_04_v3	338044	338421	378	338247	141	30.319	3.10588	28.8901	NF_5mC_peak_875	PF3D7_0406500		NYN domain-containing protein, putative
Pf3D7_04_v3	338680	340539	1860	338936	253	102.879	5.59446	99.6614	NF_5mC_peak_876	PF3D7_0406500		NYN domain-containing protein, putative
Pf3D7_04_v3	340907	341476	570	341186	234	75.1817	4.39259	72.8105	NF_5mC_peak_877	PF3D7_0406500		NYN domain-containing protein, putative
Pf3D7_04_v3	342230	342653	424	342418	109	10.2166	1.95341	9.19376	NF_5mC_peak_878	PF3D7_0406500		NYN domain-containing protein, putative
Pf3D7_04_v3	342889	344074	1186	343898	169	45.1462	3.69038	43.454	NF_5mC_peak_879	PF3D7_0406500		NYN domain-containing protein, putative
Pf3D7_04_v3	354228	356255	2028	355730	242	83.3267	4.69827	80.7223	NF_5mC_peak_880	PF3D7_0406900		conserved Plasmodium protein, unknown function
Pf3D7_04_v3	356532	357568	1037	357283	115	7.17361	1.68529	6.23497	NF_5mC_peak_881	PF3D7_0406900		conserved Plasmodium protein, unknown function
Pf3D7_04_v3	357869	358673	805	358433	266	82.7534	4.28389	80.1669	NF_5mC_peak_882	PF3D7_0406900		conserved Plasmodium protein, unknown function
Pf3D7_04_v3	366343	366826	484	366547	216	63.7449	4.05614	61.6653	NF_5mC_peak_883	PF3D7_0407300		transcription factor, putative
Pf3D7_04_v3	367759	368073	315	367918	144	23.6989	2.61934	22.3909	NF_5mC_peak_884	PF3D7_0407400		conserved Plasmodium protein, unknown function
Pf3D7_04_v3	373407	373656	250	373528	99	9.723	1.98061	8.71313	NF_5mC_peak_885	PF3D7_0407600		conserved Plasmodium protein, unknown function
Pf3D7_04_v3	374461	374736	276	374602	92	8.51728	1.92299	7.54001	NF_5mC_peak_886	PF3D7_0407600		conserved Plasmodium protein, unknown function
Pf3D7_04_v3	375073	375467	395	375278	106	11.9481	2.11456	10.8824	NF_5mC_peak_887	PF3D7_0407600		conserved Plasmodium protein, unknown function
Pf3D7_04_v3	375605	375956	352	375783	107	10.0974	1.9568	9.07792	NF_5mC_peak_888	PF3D7_0407600		conserved Plasmodium protein, unknown function
Pf3D7_04_v3	378819	379559	741	379059	174	37.8277	3.16127	36.2675	NF_5mC_peak_889	PF3D7_0407700		conserved Plasmodium protein, unknown function
Pf3D7_04_v3	381117	382627	1511	382004	179	34.3754	2.90971	32.8758	NF_5mC_peak_890	PF3D7_0407700		conserved Plasmodium protein, unknown function
Pf3D7_04_v3	386236	386558	323	386348	95	6.68662	1.73586	5.76345	NF_5mC_peak_891	PF3D7_0407800	CINCH	protein CINCH
Pf3D7_04_v3	387738	388651	914	388406	187	47.7585	3.57619	46.0179	NF_5mC_peak_892	PF3D7_0407800	CINCH	protein CINCH
Pf3D7_04_v3	389493	389999	507	389679	137	18.6802	2.35456	17.469	NF_5mC_peak_893	PF3D7_0407800	CINCH	protein CINCH
Pf3D7_04_v3	390450	390696	247	390603	95	5.90947	1.66434	5.01183	NF_5mC_peak_894	PF3D7_0407800	CINCH	protein CINCH
Pf3D7_04_v3	392152	393345	1194	393099	207	60.9133	4.03905	58.8988	NF_5mC_peak_895	PF3D7_0407900		AAA family ATPase, putative
Pf3D7_04_v3	398409	398926	518	398746	191	42.6706	3.23587	41.0229	NF_5mC_peak_896	PF3D7_0408100		conserved Plasmodium protein, unknown function
Pf3D7_04_v3	399227	400704	1478	400311	200	60.3884	4.12558	58.3868	NF_5mC_peak_897	PF3D7_0408100		conserved Plasmodium protein, unknown function
Pf3D7_04_v3	401457	403150	1694	401700	250	71.4846	3.96802	69.2104	NF_5mC_peak_898	PF3D7_0408200		conserved Plasmodium protein, unknown function
Pf3D7_04_v3	404351	404633	283	404473	94	10.5279	2.09242	9.49709	NF_5mC_peak_899	PF3D7_0408300	ZRANB2	zinc finger Ran-binding domain-containing protein 2, putative
Pf3D7_04_v3	407493	407869	377	407656	157	30.7059	2.92789	29.27	NF_5mC_peak_900	PF3D7_0408400		conserved protein, unknown function
Pf3D7_04_v3	409098	409635	538	409372	179	45.2612	3.54153	43.567	NF_5mC_peak_901	PF3D7_0408500	FEN1	flap endonuclease 1
Pf3D7_04_v3	410135	410536	402	410368	148	28.0743	2.86224	26.6858	NF_5mC_peak_902	PF3D7_0408500	FEN1	flap endonuclease 1
Pf3D7_04_v3	419766	420039	274	419919	96	11.2094	2.13647	10.1614	NF_5mC_peak_903	PF3D7_0408700	PLP1	perforin-like protein 1
Pf3D7_04_v3	420204	420585	382	420385	116	18.9325	2.57698	17.7161	NF_5mC_peak_904	PF3D7_0408700	PLP1	perforin-like protein 1
Pf3D7_04_v3	425074	425575	502	425401	129	23.979	2.80562	22.6655	NF_5mC_peak_905	PF3D7_0408900	KAE1	tRNA N6-adenosine threonylcarbamoyltransferase
Pf3D7_04_v3	425779	426436	658	425939	133	23.4218	2.71707	22.1188	NF_5mC_peak_906	PF3D7_0408900	KAE1	tRNA N6-adenosine threonylcarbamoyltransferase
Pf3D7_04_v3	429477	429859	383	429675	195	45.0351	3.31786	43.3447	NF_5mC_peak_907	PF3D7_0409000		conserved Plasmodium protein, unknown function
Pf3D7_04_v3	436426	436766	341	436591	150	28.9749	2.89797	27.5699	NF_5mC_peak_908	PF3D7_0409100	PRPF31	U4/U6 small nuclear ribonucleoprotein PRP31, putative
Pf3D7_04_v3	437279	437821	543	437543	243	89.8189	5.04527	87.0235	NF_5mC_peak_909	PF3D7_0409100	PRPF31	U4/U6 small nuclear ribonucleoprotein PRP31, putative
Pf3D7_04_v3	439027	439285	259	439162	103	8.47097	1.84768	7.49478	NF_5mC_peak_910	PF3D7_0409200	SOF1	protein SOF1, putative
Pf3D7_04_v3	443898	444270	373	444049	117	15.7766	2.32167	14.6252	NF_5mC_peak_911	PF3D7_0409300		methyltransferase, putative
Pf3D7_04_v3	447316	447746	431	447547	150	24.9218	2.63913	23.5904	NF_5mC_peak_912	PF3D7_0409400	DnaJ	chaperone protein DnaJ
Pf3D7_04_v3	453251	453684	434	453429	113	13.0873	2.14954	11.9954	NF_5mC_peak_913	PF3D7_0409600	RPA1	replication protein A1, large subunit
Pf3D7_04_v3	454731	454988	258	454850	87	6.22144	1.7353	5.31362	NF_5mC_peak_914	PF3D7_0409600	RPA1	replication protein A1, large subunit
Pf3D7_04_v3	460019	460407	389	460217	127	17.6908	2.37196	16.4994	NF_5mC_peak_915	PF3D7_0409800		zinc finger protein, putative
Pf3D7_04_v3	466289	466721	433	466522	178	51.244	3.93734	49.437	NF_5mC_peak_916	PF3D7_0410000	EVP1	erythrocyte vesicle protein 1
Pf3D7_04_v3	470973	471448	476	471302	116	12.2245	2.06163	11.1528	NF_5mC_peak_917	PF3D7_0410300	PPM1	protein phosphatase PPM1, putative
Pf3D7_04_v3	471669	472487	819	471888	145	26.2698	2.77725	24.9135	NF_5mC_peak_918	PF3D7_0410300	PPM1	protein phosphatase PPM1, putative
Pf3D7_04_v3	474651	474934	284	474789	118	13.8427	2.16786	12.7338	NF_5mC_peak_919	PF3D7_0410400	RRP4	exosome complex component RRP4
Pf3D7_04_v3	476065	476489	425	476284	153	36.2207	3.34305	34.6892	NF_5mC_peak_920	PF3D7_0410500		conserved Plasmodium protein, unknown function
Pf3D7_04_v3	483077	483708	632	483291	175	49.5119	3.87648	47.7375	NF_5mC_peak_921	PF3D7_0410700	RbgA	ribosome biogenesis GTPase A, putative
Pf3D7_04_v3	486733	487060	328	486940	132	24.6218	2.81526	23.2965	NF_5mC_peak_922	PF3D7_0410800		conserved Plasmodium protein, unknown function
Pf3D7_04_v3	487663	488092	430	487828	108	11.9995	2.1029	10.9328	NF_5mC_peak_923	PF3D7_0410800		conserved Plasmodium protein, unknown function
Pf3D7_04_v3	489455	489766	312	489612	134	26.5476	2.92981	25.1868	NF_5mC_peak_924	PF3D7_0410800		conserved Plasmodium protein, unknown function
Pf3D7_04_v3	491582	492243	662	491870	124	18.2847	2.44254	17.0814	NF_5mC_peak_925	PF3D7_0410900		conserved Plasmodium protein, unknown function
Pf3D7_04_v3	492487	493761	1275	492959	243	75.4837	4.26455	73.1033	NF_5mC_peak_926	PF3D7_0410900		conserved Plasmodium protein, unknown function
Pf3D7_04_v3	500968	501419	452	501149	157	31.7934	2.99646	30.3387	NF_5mC_peak_927	PF3D7_0411000		conserved Plasmodium protein, unknown function
Pf3D7_04_v3	501471	502053	583	501740	166	36.901	3.20504	35.3576	NF_5mC_peak_928	PF3D7_0411000		conserved Plasmodium protein, unknown function
Pf3D7_04_v3	505730	505994	265	505907	116	17.1975	2.44072	16.017	NF_5mC_peak_929	PF3D7_0411200		PP-loop family protein, putative
Pf3D7_04_v3	506696	507033	338	506874	139	25.0266	2.76071	23.6935	NF_5mC_peak_930	PF3D7_0411200		PP-loop family protein, putative
Pf3D7_04_v3	511091	511895	805	511595	133	18.284	2.36118	17.0808	NF_5mC_peak_931	PF3D7_0411300		conserved Plasmodium protein, unknown function
Pf3D7_04_v3	515117	515450	334	515282	146	25.4522	2.71296	24.1112	NF_5mC_peak_932	PF3D7_0411400		DEAD box ATP-dependent RNA helicase, putative
Pf3D7_04_v3	520561	520913	353	520721	127	15.7718	2.23714	14.6205	NF_5mC_peak_933	PF3D7_0411800		conserved Plasmodium protein, unknown function
Pf3D7_04_v3	522938	523346	409	523160	162	35.3016	3.15642	33.7862	NF_5mC_peak_934	PF3D7_0411800		conserved Plasmodium protein, unknown function
Pf3D7_04_v3	524880	525264	385	525052	160	27.198	2.68318	25.8247	NF_5mC_peak_935	PF3D7_0411800		conserved Plasmodium protein, unknown function
Pf3D7_04_v3	532994	533409	416	533243	143	19.2755	2.34538	18.0527	NF_5mC_peak_936	PF3D7_0411900		DNA polymerase alpha catalytic subunit A
Pf3D7_04_v3	538310	539194	885	538936	167	37.4189	3.22423	35.8661	NF_5mC_peak_937	PF3D7_0412000		LITAF-like zinc finger protein, putative
Pf3D7_04_v3	547329	550005	2677	547866	269	104.256	5.32285	100.99	NF_5mC_peak_938	PF3D7_0412400	VAR	erythrocyte membrane protein 1, PfEMP1
Pf3D7_04_v3	550476	550724	249	550573	84	5.84056	1.71392	4.94525	NF_5mC_peak_939	PF3D7_0412400	VAR	erythrocyte membrane protein 1, PfEMP1
Pf3D7_04_v3	551053	553776	2724	551989	195	48.9958	3.53688	47.2318	NF_5mC_peak_940	PF3D7_0412400	VAR	erythrocyte membrane protein 1, PfEMP1
Pf3D7_04_v3	561309	561754	446	561520	199	49.7176	3.52415	47.9396	NF_5mC_peak_941	PF3D7_0412700	VAR	erythrocyte membrane protein 1, PfEMP1
Pf3D7_04_v3	563100	564314	1215	564081	173	44.0685	3.55668	42.396	NF_5mC_peak_942	PF3D7_0412700	VAR	erythrocyte membrane protein 1, PfEMP1
Pf3D7_04_v3	564415	566315	1901	565469	202	59.0484	4.01174	57.0758	NF_5mC_peak_943	PF3D7_0412700	VAR	erythrocyte membrane protein 1, PfEMP1
Pf3D7_04_v3	566437	569331	2895	567252	185	44.0779	3.38841	42.4051	NF_5mC_peak_944	PF3D7_0412700	VAR	erythrocyte membrane protein 1, PfEMP1
Pf3D7_04_v3	582567	582990	424	582823	144	32.1589	3.19369	30.6974	NF_5mC_peak_945	PF3D7_0412900	VAR	erythrocyte membrane protein 1, PfEMP1
Pf3D7_04_v3	583591	584047	457	583841	106	14.872	2.35672	13.7402	NF_5mC_peak_946	PF3D7_0412900	VAR	erythrocyte membrane protein 1, PfEMP1
Pf3D7_04_v3	584232	584547	316	584346	116	18.9325	2.57698	17.7161	NF_5mC_peak_947	PF3D7_0412900	VAR	erythrocyte membrane protein 1, PfEMP1
Pf3D7_04_v3	597732	598139	408	597989	114	18.0902	2.53292	16.8905	NF_5mC_peak_948	PF3D7_0413100	VAR	erythrocyte membrane protein 1, PfEMP1
Pf3D7_04_v3	598663	599839	1177	599210	164	41.7033	3.543	40.0735	NF_5mC_peak_949	PF3D7_0413100	VAR	erythrocyte membrane protein 1, PfEMP1
Pf3D7_04_v3	609670	610081	412	609899	120	15.3274	2.26172	14.1857	NF_5mC_peak_950	PF3D7_0413300	RIF	rifin
Pf3D7_04_v3	611398	611651	254	611526	116	14.8968	2.2636	13.7646	NF_5mC_peak_951	intergenic
Pf3D7_04_v3	611996	612366	371	612149	136	15.6764	2.16581	14.5269	NF_5mC_peak_952	intergenic
Pf3D7_04_v3	612490	613727	1238	612685	118	13.3352	2.13017	12.2381	NF_5mC_peak_953	intergenic
Pf3D7_04_v3	613931	614201	271	614108	102	10.838	2.05369	9.79999	NF_5mC_peak_954	intergenic
Pf3D7_04_v3	615597	615876	280	615688	119	11.4475	1.98452	10.3943	NF_5mC_peak_955	PF3D7_0413500	PGM2	phosphoglucomutase-2
Pf3D7_04_v3	620220	620876	657	620649	179	41.8421	3.33577	40.2099	NF_5mC_peak_956	PF3D7_0413700		lysine decarboxylase-like protein, putative
Pf3D7_04_v3	623699	624116	418	623881	152	26.1435	2.69597	24.7902	NF_5mC_peak_957	PF3D7_0413900	USP13	ubiquitin carboxyl-terminal hydrolase 13, putative
Pf3D7_04_v3	625189	625781	593	625433	202	52.429	3.63383	50.5987	NF_5mC_peak_958	PF3D7_0413900	USP13	ubiquitin carboxyl-terminal hydrolase 13, putative
Pf3D7_04_v3	629868	630209	342	630103	80	4.60961	1.60429	3.75839	NF_5mC_peak_959	PF3D7_0414000	SMC3	structural maintenance of chromosomes protein 3
Pf3D7_04_v3	632442	632808	367	632628	124	11.9481	1.99026	10.8825	NF_5mC_peak_960	PF3D7_0414000	SMC3	structural maintenance of chromosomes protein 3
Pf3D7_04_v3	636917	637248	332	637101	134	17.8204	2.32178	16.6265	NF_5mC_peak_961	PF3D7_0414100		conserved Plasmodium membrane protein, unknown function
Pf3D7_04_v3	637555	637814	260	637671	112	10.9929	1.99478	9.95049	NF_5mC_peak_962	PF3D7_0414100		conserved Plasmodium membrane protein, unknown function
Pf3D7_04_v3	652878	653502	625	653354	138	26.4662	2.87258	25.1069	NF_5mC_peak_963	PF3D7_0414400		conserved Plasmodium protein, unknown function
Pf3D7_04_v3	673080	673644	565	673426	250	82.1339	4.49642	79.566	NF_5mC_peak_964	PF3D7_0415200		conserved Plasmodium protein, unknown function
Pf3D7_04_v3	675958	676220	263	676064	102	7.50416	1.77143	6.55558	NF_5mC_peak_965	PF3D7_0415200		conserved Plasmodium protein, unknown function
[truncated: 5,504 more rows]

## Sheet: NF54CSAh_5hmC_peaks
chr	start	end	length	abs_summit	pileup	-log10(p-value)	fold_enrichment	-log10(q-value)	peak_name	gene	name	description
[truncated: 269 more rows]
